# Supplementary material for: Integrated Metabolomics and Morpho-Biochemical Analyses Reveal a Better Performance of Azospirillum brasilense over Plant-Derived Biostimulants in Counteracting Salt Stress in Tomato
Source: MDPI journal article supplement (doi:10.3390/ijms232214216), 2022-11-17
Supplement: s1 [file s1]

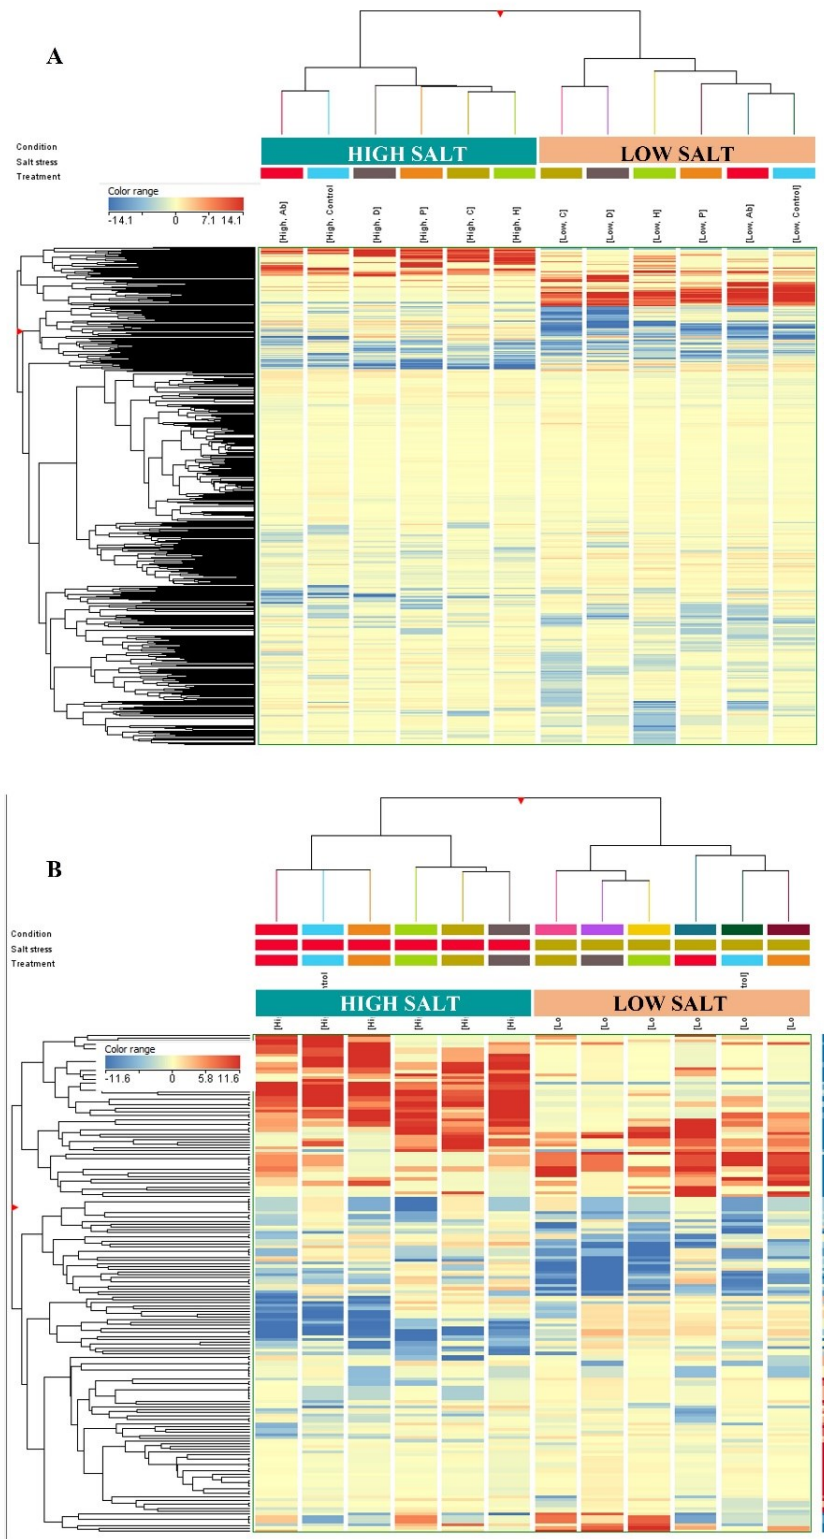

**Supplementary Figure S1.** Unsupervised hierarchical cluster analysis carried out from UHPLC-ESI/QTOF-MS metabolomic analysis of leaves (A) and root exudates (B) of tomato plants under low salt or high salt conditions, treated with either protein hydrolysates-based biostimulants (PHs), or with PGPR *A. brasilense*. The fold-change based heat map was used to build hierarchical clusters (linkage rule: Ward; distance: Euclidean).
