# Supplementary material for: Integrated Metabolomics and Morpho-Biochemical Analyses Reveal a Better Performance of Azospirillum brasilense over Plant-Derived Biostimulants in Counteracting Salt Stress in Tomato
Source: Int J Mol Sci. 2022 Nov 17;23(22):14216. doi: 10.3390/ijms232214216 (PMC9698407; doi:10.3390/ijms232214216)
Supplement: Supplementary file 1 [file ijms-23-14216-s001.zip › Supplementary Table S1.xlsx]

## Sheet: Supplementary Table S1
Supplementary Table S1:	Sequence of forward and reverse primers used in Real-time RT-PCR experiments.
Gene	Forward primer 5-3	Reverse primer 5-3
SlEF1α	ACTGTGCAGTGTGATGCTGG	AATACACAACTCAAAGACCAAAC
SlPAL6	ACTTCAATTATTTTTTACATTTACC	AAGGACTTGTAATAATATATAGCT
SlPAL2	TTGTGGAACTTTTTCTAATGGTT	GAAAGAAGCCACAAAAGTTCAA
