# Supplementary material for: Integrated Metabolomics and Morpho-Biochemical Analyses Reveal a Better Performance of Azospirillum brasilense over Plant-Derived Biostimulants in Counteracting Salt Stress in Tomato
Source: Int J Mol Sci. 2022 Nov 17;23(22):14216. doi: 10.3390/ijms232214216 (PMC9698407; doi:10.3390/ijms232214216)
Supplement: Supplementary file 1 [file ijms-23-14216-s001.zip › Supplementary Table S2.xlsx]

## Sheet: Supplementary Table S2
Supplementary Table S2:		ANOVA mean square values
	Parameters			Mean squarea
				Salt levels (S)	Biostimulants (B)	S × B
	Biomass	RDW		0.00003***	0.0003***	0.00006***
		SDW		0.19***	0.007***	0.004***
	WinRhizo	Length		0.09***	0.003***	0.0009**
		Surface area		10.7NS	633.6***	211.6***
		Volume		0.017***	0.024***	0.01***																		1
	Antioxidant enzymes	CAT		3.74***	1.27***	0.42***
		APX		48,714***	76,969***	10,549***
		GPX		57,124***	5,282***	3,034***
		SOD		5.54***	1.89***	0.53***
	Compounds in leaves	Phenolics		0.00004NS	0.009***	0.007***
		Flavonoids		0.23***	1.42***	0.50***
		Proline		23,865***	1,271***	1,228***
	aAsterisks denote levels of statistical significance: ** p < 0.01, *** p < 0.001.
	NSnot significant.
