# Supplementary material for: Integrated Metabolomics and Morpho-Biochemical Analyses Reveal a Better Performance of Azospirillum brasilense over Plant-Derived Biostimulants in Counteracting Salt Stress in Tomato
Source: Int J Mol Sci. 2022 Nov 17;23(22):14216. doi: 10.3390/ijms232214216 (PMC9698407; doi:10.3390/ijms232214216)
Supplement: Supplementary file 1 [file ijms-23-14216-s001.zip › Supplementary Table S3.xlsx]

## Sheet: Dataset leaves
		Low salt																																				High salt
Compound	Compound Name	Ab1-r001	Ab1-r002	Ab2-r001	Ab2-r002	Ab3-r001	Ab3-r002	C1-r001	C1-r002	C2-r001	C2-r002	C3-r001	C3-r002	Ct1-r001	Ct1-r002	Ct2-r001	Ct2-r002	Ct3-r001	Ct3-r002	D1-r001	D1-r002	D2-r001	D2-r002	D3-r001	D3-r002	H1-r001	H1-r002	H2-r001	H2-r002	H3-r001	H3-r002	P1-r001	P1-r002	P2-r001	P2-r002	P3-r001	P3-r002	SCt1-r001	SCt1-r002	SCt2-r001	SCt2-r002	SCt3-r001	SCt3-r002	SAb1-r001	SAb1-r002	SAb2-r001	SAb2-r002	SAb3-r001	SAb3-r002
1-183-2-183-SN-GLYCEROL-PHOSPHOCHOLINE	1-&alpha;-linolenoyl-2-&alpha;-linolenoyl-phosphatidylcholine	5948353	5.81182e+06	5827081	5.71982e+06	4.55882e+06	4.41073e+06	1193982	1.19949e+06	9425298	9656215	12299933	12569957	6647356	6533862	5638831	5.54026e+06	9381469	9058094	8405800	8815718	10508710	10241770	10476038	10723209	1	1	8948348	8934079	4.58214e+06	4.43768e+06	10001608	9613757	11632523	11831936	9772078	9867317	7547486	6.7849e+06	8.32856e+06	8.083e+06	8720966	8619290	7.62439e+06	7.5393e+06	15543229	15728582	12926183	12823126
1-3-7-TRIMETHYLXANTHINE	caffeine	48765.6	24989.5	46769.9	44705.9	17720	41797.6	1	11735.1	37722.5	37083.1	41363.8	10616	22890.2	41218	41122.1	43011.4	29630.8	24101.3	17517.6	39312.2	35744.3	43914	41676.5	30628.8	33926.1	33363.9	17005	53691.9	41660.9	42284.6	37797.2	31201.7	43081.2	36306.2	24325.7	17020.1	17666.5	35418.6	17387.8	10843.2	10546.8	34245	11367.3	29397.2	16378.2	17451	17124.9	12156.9
16-EPIVELLOSIMINE	16-epivellosimine	10764.2	1	1	23223.5	1	1	1	1	1	1	1	1	1	1	24567.2	30380.8	28460.2	1	1	1	16437.3	11003.2	1	1	73463.2	53151.7	1	1	51515.3	42624.2	1	1	58551.1	52947.3	57308.5	50676	47837.9	51189.8	1	22576.3	1	1	1	1	1	10907.1	17893.9	10917.5
16-HYDROXYPALMITATE	16-hydroxypalmitate	63881.7	64773.2	101658	110955	60805.8	66676.1	128654	125311	98750.3	88015.4	54931.8	55812.8	75015.6	77857.3	150687	150608	101377	93574.1	131002	121654	99588.1	103262	57429.6	57426.5	397140	389218	223643	222734	109822	102991	74440.8	71582.1	62498.1	60884.2	71710	76492.2	55423.9	68411.6	80701.2	89303.4	48193.9	46939.1	99188	110664	109050	101705	78369.2	80784.2
17-O-ACETYLNORAJMALINE	17-<i>O</i>-acetylnorajmaline	372400	378540	530763	523154	392462	364379	117876	129909	372072	404055	425874	419103	451330	407067	441159	444890	427812	426870	364026	388944	401104	381051	376891	383291	243047	255336	540992	553527	626425	639569	466707	454861	412389	413823	423160	417722	638356	552122	599808	573257	556149	592609	483970	473891	428979	456743	614172	651836
17-O-DEACETYLVINDOLINE	17-O-deacetylvindoline	1	1	1	1	1	1	63169	75900.8	1	1	1	1	1	1	1	1	1	1	23364.9	29648.8	1	1	1	1	37102.1	18017.1	1	1	22854.2	24840.2	1	1	1	1	1	1	1	1	1	1	1	1	1	1	1	1	1	1
18-OXOOLEATE	18-oxo-oleate	1	11545.9	16711.2	12775.6	1	1	39892	38158.7	27166.2	24964.3	27812.4	29051.8	11442	1	40905.5	40734.9	20477.4	20672.6	37850.8	33270.6	19335.1	19279.5	1	1	117731	123198	61957	65920.6	1	1	12608.3	12637.3	1	1	1	1	11358.5	11549.6	20468.6	24073.3	1	1	19865.1	19049	18736.4	17491.9	1	1
1-KESTOTRIOSE	1-kestotriose	12548.2	1	12349.6	12659.3	1	1	32890.4	28601.3	27918.4	25180.8	38558.6	37465.3	1	12709.1	1	1	1	1	20219.7	20027.7	13539.1	14830.6	12413.4	19974.5	111752	122314	131837	132003	99805.2	115083	14124.6	13236.7	1	1	13348.4	11601.2	1	1	1	1	1	1	1	1	55044.1	47821.4	39862.3	38387.7
1-KETO-2-METHYLVALERATE	(<i>R</i>)-2,3-dihydroxy-3-methylpentanoate	41311	40554.9	75637.6	83232.1	1	19002.8	1	1	1	1	46397.9	38090.5	31558.4	32104.9	47183.9	43784.4	23569.2	18421.3	1	1	1	1	1	1	1	1	11047.7	1	1	1	66461.8	65322.2	48046.9	30568.8	20210.1	18272.9	54255.3	47779.6	60406.5	63481.7	82238.4	84465	147937	139220	266948	272147	228000	237698
1-O-GALLOYL-BETA-D-GLUCOSE	1-O-galloyl-&beta;-D-glucose	31176.2	29838.6	25378	27151.3	10800.9	1	1	1	17107.3	18177.4	1	44903.5	31056.4	23074	27093.3	28560.1	38151.4	12033.8	27376.4	21520.3	20803.4	23404.1	19647.4	21379.4	19955	27196.5	11238.9	12390	17780.3	13234.8	35552.9	33773.9	35021.8	41256.6	22988	29574.6	10825.3	30667.5	30099.8	30832	23207.9	29396.1	12157	28345.2	37559.9	10755.9	38393.2	33784.2
1-O-SINAPOYL-BETA-D-GLUCOSE	1-<i>O</i>-sinapoyl-&beta;-D-glucose	254482	245745	189419	200862	91348.7	89870.1	119785	121259	157964	290201	346591	343971	269385	276783	324098	319360	171957	298019	371773	176549	345537	351623	391949	233361	108083	91584.9	1	1	76367.4	71529	488295	280790	376630	385379	326409	334984	1	132409	166863	1	257512	251444	1	176059	305290	306494	531171	539288
1-PALMITOYLGLYCEROL-3-PHOSPHATE	1-palmitoyl-<i>sn</i>-glycerol 3-phosphate	1	1	103583	88235.3	1	23255.4	1	1	78658.9	58580.5	139027	137393	1	105495	77081.1	76613.8	104496	90118.1	1	1	97071.5	96194.7	78770.3	79428.7	1	1	152354	150617	1	51602.6	159718	146204	93933.4	96049.9	81531.4	83152.8	42278.6	41694.1	56481.5	56857.3	87652.2	86248.9	121051	115472	212579	205148	314171	317746
23-DIPHOSPHOGLYCERATE	2,3-diphospho-D-glycerate	55098.1	59915.4	96086.3	95961.1	44893.1	51883.5	13224.3	13054.7	111278	114213	151451	155176	89247.9	95675.9	111375	122219	122864	120584	88286.2	90930.1	85807.3	80367.9	84699.9	90551.6	32030.9	35531.1	129606	131796	78626.5	79541.1	118553	115076	81155.2	73733.2	84708.4	87955.1	1	1	1	1	1	1	1	1	1	1	1	1
2-ACETO-2-HYDROXY-BUTYRATE	(<i>S</i>)-2-aceto-2-hydroxybutanoate	138389	137023	190255	188904	103217	97277.1	1	1	81852.6	79891.4	137123	136811	129525	134663	149577	145535	121004	124749	79219.6	64929.9	84653.8	91014.1	60384.4	56608.9	17553.7	17674.5	99203	102120	47906.4	55394.3	175396	171403	136194	139936	113241	113652	145445	151638	153105	160934	198978	194785	319759	308469	567745	596780	495898	491444
2-AMINOACRYLATE	2-aminoprop-2-enoate	1	1	1	1	1	1.67976e+06	27594.6	11876.7	30724	16207.5	18874.3	11466.5	1	1	1	1	1	1	1	1	179485	16959.4	130110	41171.4	23906.8	1	1	1	1	1	1	1	1	1	1	1	1	1	1	1	1	1	1	1	1	1	1	1
2-CARBOXY-D-ARABINITOL-1-PHOSPHATASE	2-carboxy-D-arabinitol 1-phosphate	34237.5	33511.4	34842	44254.8	33071.7	33230.6	1	1	1	10687.2	23575.6	22266.9	35150	36499.9	43017.4	41107.5	34845	33501.2	11301.8	11056.9	17440.2	21165.5	1	11726.7	1	1	31586	33205.4	24237.9	12043.9	35833.1	33782.4	32897.7	31034.4	31075.3	19384.5	1	1	1	1	1	1	1	1	1	1	1	1
2-C-METHYL-D-ERYTHRITOL-4-PHOSPHATE	2-C-methyl-D-erythritol 4-phosphate	33673.1	35592.3	35064.4	31159.8	27070.2	29799	1	1	1	1	22380.6	17725.3	30607.7	37166.6	39218.2	39811.7	38313.5	32229.5	12618.3	10984.2	13029.3	11572.8	1	10862.7	1	1	26408.6	29608.6	27434.3	19457.5	37180.6	34398.7	34415.3	32087.9	22271.1	21312.2	18487.6	16824.4	23864	30389	24805.4	24035.5	1	1	16589.2	1	11154.8	11526.2
2-DEHYDROPANTOATE	2-dehydropantoate	138389	137023	190255	188904	103217	97277.1	1	1	81852.6	79891.4	137123	136811	129525	134663	149577	145535	121004	124749	79219.6	64929.9	84653.8	91014.1	60384.4	56608.9	17553.7	17674.5	99203	102120	47906.4	55394.3	175396	171403	136194	139936	113241	113652	145445	151638	153105	160934	198978	194785	319759	308469	567745	596780	495898	491444
2-D-THREO-HYDROXY-3-CARBOXY-ISOCAPROATE	(2<i>R</i>,3<i>S</i>)-3-isopropylmalate	84608.8	83644.3	84433.4	77319.9	82064.4	82873.6	1	1	81257.7	72470.5	87051.8	87646.8	80651.1	82994.2	72164.5	77171.3	78204.3	79624.1	1	88696.6	87023.4	86804.9	86320.6	85657.8	71095.7	58262.7	78513.6	78833.3	69328.9	70405.4	79913.3	81980.8	84920	80058.3	78129	70074.4	58508.9	57973.8	52587.8	55715.1	52677.2	55048.5	58831.3	64869.3	59371.7	62004.8	62456.9	62207.9
2-HYDROXY-23-DIHYDRODAIDZEIN	(3R)-2'-hydroxydihydrodaidzein	107480	101635	40245.1	29710.2	65539.6	61541.8	64880	58605.1	28332.8	26453.5	14276.1	15361.3	40862.8	43617.1	31957.5	20344.7	26841.3	25250.6	32217.9	31667.2	41605.6	44122.4	29482.8	31624.9	38792.5	34700.6	17770.4	15420.4	38398.8	38922.3	23744.1	22895.2	39048.4	38796.8	37743.1	47054.4	22367.3	44889.7	35570	17268	1	1	66334	62702	48776.4	42729.6	11513.8	18260.4
2-HYDROXYFORMONONETIN	2-hydroxyformononetin	1	1	1	1	1	1	1	1	1	1	1	1	1	1	1	1	1	1	1	1	1	1	1	1	1	1	11413.7	17915.6	1	1	1	1	1	1	1	1	1	1	1	1	1	1	1	1	1	1	1	1
2-HYDROXYISOFLAVANONE	2,4',7-trihydroxyisoflavanone	107480	101635	40245.1	29710.2	65539.6	61541.8	64880	58605.1	28332.8	26453.5	14276.1	15361.3	40862.8	43617.1	31957.5	20344.7	26841.3	25250.6	32217.9	31667.2	41605.6	44122.4	29482.8	31624.9	38792.5	34700.6	17770.4	15420.4	38398.8	38922.3	23744.1	22895.2	39048.4	38796.8	37743.1	47054.4	22367.3	44889.7	35570	17268	1	1	66334	62702	48776.4	42729.6	11513.8	18260.4
2K-4CH3-PENTANOATE	4-methyl-2-oxopentanoate	154557	68061.9	213620	212456	45910.6	60988.6	10764.1	28140.8	119508	46171.1	172496	159884	154822	59136.9	160886	172525	145625	130296	71050.9	60928.8	65786.9	64450.4	24967	32309	10506.9	1	148379	69769.4	35973.7	1	203460	11620.8	129283	130977	28219.8	21668.5	45994.1	58327.5	59804.1	57453.1	85330.6	93109.4	129032	118689	41736.4	49252.8	89026.9	198988
2K-ADIPATE	2-oxoadipate	277603	282016	176004	166165	141378	137234	57234.6	60194.1	57390.4	51995	52285.4	54044.9	100681	101824	129328	138366	110472	106659	56200.3	65574.6	32549.1	29679.7	1	1	60464.2	53905.9	35256.6	33196.8	26114.9	25473.7	74406.8	77683.2	56337.2	57970.9	47785.7	47152.1	1	1	1	1	1	1	1	1	1	1	1	1
2-KETO-3-METHYL-VALERATE	(<i>S</i>)-3-methyl-2-oxopentanoate	154557	68061.9	213620	212456	45910.6	60988.6	10764.1	28140.8	119508	46171.1	172496	159884	154822	59136.9	160886	172525	145625	130296	71050.9	60928.8	65786.9	64450.4	24967	32309	10506.9	1	148379	69769.4	35973.7	1	203460	11620.8	129283	130977	28219.8	21668.5	45994.1	58327.5	59804.1	57453.1	85330.6	93109.4	129032	118689	41736.4	49252.8	89026.9	198988
2-KETO-6-AMINO-CAPROATE	6-amino-2-oxohexanoate	29253.3	19144.3	11725.7	16356.3	1	1	1	1	1	1	1	12110.5	12814.4	16693.1	17736.4	11391.3	1	1	1	1	1	1	1	11369.9	17816.6	16982.1	16749.7	16789.1	1	1	12861.3	11693.7	1	11532.5	1	1	1	1	1	1	1	1	1	1	1	1	1	1
2-KETO-GLUTARAMATE	2-oxoglutaramate	1	674989	1.66136e+06	936681	309585	382973	1	1	132612	318792	1	1	817757	673724	1	1	278710	1	1	144778	328917	350262	273328	121748	375726	502170	1	132458	386437	1	344710	1	1	1	281516	628792	618285	485509	2.25663e+06	319809	552748	161337	659175	2.54718e+06	1	1	1	1
2-KETO-ISOVALERATE	3-methyl-2-oxobutanoate	1.88936e+06	134555	115800	51821.3	142625	165376	68840.7	58382	849649	134315	26645.2	28911	1.75871e+06	127166	1.9092e+06	1.90887e+06	127891	1.66195e+06	84093.6	903310	63621.9	993206	858924	99941.9	1.14276e+06	1.20214e+06	1.44102e+06	55572.9	182091	129554	30028.1	31787.6	121259	69642.7	70214.7	55177.6	1.01806e+06	1.15596e+06	1.18663e+06	1.36091e+06	1.39963e+06	1.41555e+06	926238	882592	982886	923894	1.03251e+06	102108
2-METHYL-3-HYDROXY-BUTYRYL-COA	(2S,3S)-3-hydroxy-2-methylbutanoyl-CoA	47582.6	44881.6	42033.1	44630.5	30912	28288.2	23794.5	25506.7	39487.7	42987.1	74375.5	73000.6	42396.6	41560.1	46287.8	43442	63492.6	66869.9	40852.7	44207.2	44513.4	48705.6	47026	42822.6	53953	58215.4	56079.8	53739.3	105624	98596.7	61123.9	53686.7	64647.6	65183.5	53397.1	53037.7	72984.7	60638.8	50071.4	45854.6	49433.5	50720.9	62497.2	62120.4	54668.3	55356.3	52325.7	52111.2
2-METHYLPROPANAL-OXIME	(<i>E</i>)-2-methylpropanal-oxime	10413.6	115561	126234	122527	98455.5	110999	64757	49652.7	101902	102762	156696	148724	106944	16944.4	92013.1	10671	119264	108690	116620	121607	144907	133900	114341	113026	87975.6	89855.3	164697	157141	128123	110004	131539	130617	129838	140727	126267	132589	108053	59506.5	86888.9	90840.8	81695.7	86601.1	43054.7	50064.7	47738.9	57536.7	47453.6	43563.8
2-O-CAFFEOYLGLUCARATE	2-O-caffeoylglucarate	101692	90341.7	38723.7	38739.1	48756.3	46675	1	1	1	1	1	1	16746.5	17383.1	17659.4	22590.9	10878.2	1	1	1	1	1	1	1	1	1	1	1	1	1	1	1	1	1	1	1	1	1	1	1	1	1	1	1	1	1	1	1
2-OXOBUTANOATE	2-oxobutanoate	1	1	1	1	97324.2	239865	1	74321.7	1	1	1	1	1	1	1	94915.5	38209.7	22181.6	1	38126.3	1	32837.3	1	130872	25201.5	280626	1	1	139422	80129	1	1	51717.6	1	1	155757	1	9858.41	48409.6	1	34262.4	11097.3	22565.5	31028.5	4191.51	1	1	36470.8
2-TRANS6-TRANS-FARNESOL	(<i>2E,6E</i>)-farnesol	1	1	1	1	1	1	1	1	53295.4	51971.8	131419	86958.6	1	1	1	1	1	1	716614	669587	538146	620648	528676	549046	1	1	30848.8	30776.6	1	1	538183	547120	566314	568556	504916	489803	1	1	1	1	1	1	1	1	1	1	1	1
2-UNDECANONE	2-undecanone	34844.3	36632.3	51762.2	54222.7	41675.1	50356.8	11283.2	11372.7	44051.4	38898.6	46378.5	51215.4	35127.8	29430.5	35254.8	22878.9	47935.9	54095.5	41686.1	41268.7	41027.5	40379.5	42122.6	31498.8	35506	28343.8	71629	67157.1	78028.2	82538.9	35329.7	34196.5	52179.1	52352.6	47173.5	47777.8	41740	51404.1	41543.7	49128.7	42677.1	40597.4	57002.6	62591.4	55743.4	47077.2	40290.1	42691.6
3-B-D-GALACTOSYL-SN-GLYCEROL	3-&beta;-D-galactosyl-sn-glycerol	228296	50188	93806.5	191590	51482.9	41901.9	56659.3	60243.5	26411.3	33039.1	144036	149446	36403.3	45209.7	64780.5	126281	121037	39702.4	27562.5	89907.2	96347.6	103438	28942.4	34276.5	48834	41539.5	213117	65604.2	213535	63146.1	40573.9	51125.8	129936	49789.5	34020.1	34569.4	38022	59731.7	105081	84438.5	201729	109385	198920	59720.2	284553	266847	287005	290254
3-CARBOXY-3-HYDROXY-ISOCAPROATE	(2<i>S</i>)-2-isopropylmalate	84608.8	83644.3	84433.4	77319.9	82064.4	82873.6	1	1	81257.7	72470.5	87051.8	87646.8	80651.1	82994.2	72164.5	77171.3	78204.3	79624.1	1	88696.6	87023.4	86804.9	86320.6	85657.8	71095.7	58262.7	78513.6	78833.3	69328.9	70405.4	79913.3	81980.8	84920	80058.3	78129	70074.4	58508.9	57973.8	52587.8	55715.1	52677.2	55048.5	58831.3	64869.3	59371.7	62004.8	62456.9	62207.9
3-DEOXY-D-ARABINO-HEPTULOSONATE-7-P	3-deoxy-D-arabino-heptulosonate 7-phosphate	25618.7	18133.4	16715.5	1	28322.7	22740.5	16775	12083.5	25167.8	11866.5	1	1	18797.3	17579.1	1	1	11349.6	1	18616.7	19449.4	23501.8	25271.6	18442.4	18497.2	12679.4	11570.5	1	11229.5	12209.1	14248.2	1	1	18044.7	11416.8	12887.8	12598.2	1	1	1	1	1	1	1	1	1	1	1	1
3-HYDROXY-N-METHYL-S-COCLAURINE	(<i>S</i>)-3'-hydroxy-<i>N</i>-methylcoclaurine	137191	134425	159170	158481	71594.6	72622.1	10407.9	1	98483.1	89575.9	164625	170830	116434	126740	141184	142115	129159	126358	126661	120254	123449	127244	118620	108664	56587.7	1	149203	150643	97514.7	94585.3	139342	1	148631	158258	135694	134798	10696.8	21866.4	24387.9	28792.7	1	38764.3	1	1	24677.9	23602.1	45213.6	48743.7
3-HYDROXY-PROPIONATE	3-hydroxypropanoate	1	1	1	1	1	1	1	1	1	1	1	1	1	1	1	1	1	1	1	1	1	1	1	1	1	1	1	1	1	1	1	1	1	1	1	1	1	1	1	1	1	1	1	1	1	1	1	1
3-HYDROXY-PROPIONYL-COA	3-hydroxypropanoyl-CoA	208932	200176	186576	189039	148614	125793	148628	165588	308010	160880	305504	312519	178286	179322	189737	193174	272619	268564	165020	291250	203342	218263	178129	166493	215765	246514	235217	241570	379348	383061	246093	236184	250318	259474	210339	204462	298897	268150	204521	207490	208759	197907	244950	254668	241736	241991	231296	216532
3-KETOBUTYRATE	acetoacetate	1	1	1	1	97324.2	239865	1	74321.7	1	1	1	1	1	1	1	94915.5	38209.7	22181.6	1	38126.3	1	32837.3	1	130872	25201.5	280626	1	1	139422	80129	1	1	51717.6	1	1	155757	1	9858.41	48409.6	1	34262.4	11097.3	22565.5	31028.5	4191.51	1	1	36470.8
3-METHYLTHIOPROPYL-GLUCOSINOLATE	glucoiberverin	17892.8	21963.6	1	10864.7	1	1	1	1	1	1	1	1	1	1	1	1	1	1	1	1	1	1	1	1	1	1	1	1	1	1	1	1	1	1	1	1	1	1	1	1	1	1	1	1	1	1	1	1
3-P-HYDROXYPYRUVATE	3-phosphooxypyruvate	13895.7	12908.2	34598.7	29123.6	15774.1	13947.2	1	1	24221.8	24928.5	41150.1	39488.1	26701.8	28829.2	25760.5	26691.7	36880.8	38984.7	21532.3	21897.1	26068.4	17976.6	27607.2	29925.9	14454.3	15958.4	32696.9	31837.3	22444.9	22595.9	33539.8	28476.7	33174.6	36147.6	43013.5	41105.3	11874.4	1	11765.7	1	1	1	1	1	1	1	1	1
3-P-SERINE	<i>O</i>-phospho-L-serine	1	1	1	1	1	16563.3	10323.7	1	1	40605.8	1	11598.5	1	1	16498	12149.2	1	1	1	1	1	1	1	1	1	1	1	1	37479	1	1	1	1	1	1	1	1	1	1	1	11453	1	1	1	1	1	1	1
3-SULFINOALANINE	3-sulfino-L-alanine	35490.5	28744.5	12415.7	11908.3	70342.9	24083.4	138471	150828	11548.6	111161	18508.4	11788.9	17413.6	11669.1	17595	40225.3	36397.7	11463	125535	54987	18185.5	45063.4	63864.8	105385	130709	13454.7	11351.9	11130.3	36121.1	48628.4	1	1	17683.3	23594.5	23832.8	35988.5	17696.9	10860.3	10856.5	11118.7	1	11483.2	1	1	1	1	1	1
3-UREIDO-PROPIONATE	3-ureidopropanoate	38253.9	22971.2	19979.6	24324.6	25192.2	12959.2	1	1	28384.6	18330.9	16970.4	23250	30205.6	30945.6	18364	17585.6	25309.9	23817.7	18928.5	21392.5	18028.5	16987.7	10111	27176.1	19662.3	31006.9	26684.2	39986.9	38782.2	33043.6	17874	17698.7	35814.4	36151.9	42428.4	11918.1	18695.2	29485.6	24566.3	32946	33511.7	27978.6	11699.6	1	11194.3	1	19176.4	16665.1
3Z-PHYTOCHROMOBILIN	(3Z)-phytochromobilin	1	1	1	1	1	1	1	1	1	1	1	1	1	1	1	1	1	1	1	1	1	1	1	1	1	1	10738.4	1	16476.2	17646.1	1	1	1	1	1	1	1	1	1	1	1	1	1	1	124251	116310	104942	99474.8
4-ALPHA-METHYL-5-ALPHA	4&alpha;-methyl-5&alpha;-cholest-7-en-3&beta;-ol	72712.2	1.64382e+06	1.40994e+06	1.44322e+06	1.11834e+06	1.0471e+06	37172.9	44586.8	57004.5	54822.3	102811	103345	1.57064e+06	1.49076e+06	1.44443e+06	1.49957e+06	102907	93272.8	57989.8	58580.6	1.59267e+06	61719.2	50598.9	52947.1	1.57493e+06	1.66948e+06	80842.6	84453.8	113564	121313	77484.1	1.7035e+06	1.81592e+06	78094.1	72764.4	1.56606e+06	1.96645e+06	1.74994e+06	1.67967e+06	1631505	1.61968e+06	1.62027e+06	1.90397e+06	85358.1	75148.3	1938232	68698.4	1.94504e+06
4-AMINO-4-DEOXYCHORISMATE	4-amino-4-deoxychorismate	4.24973e+06	4.24708e+06	4.24558e+06	4.2249e+06	3.18056e+06	3178950	1.4192e+06	1.38766e+06	2.91349e+06	2.86048e+06	3.23348e+06	3185880	3.85163e+06	3.91113e+06	4.59888e+06	4.63596e+06	3.83596e+06	3.69657e+06	3.03474e+06	3062742	2.60744e+06	2.42807e+06	2196223	2.27186e+06	1.71645e+06	1737853	2.66309e+06	2735618	2237899	2.27555e+06	3712537	3690890	3.7475e+06	3658462	3397223	3.38096e+06	2.04131e+06	2.02726e+06	1.99879e+06	2.06867e+06	1.49947e+06	660245	595214	2.89996e+06	1.30414e+06	1290793	1.80749e+06	1.24188e+06
4-AMINO-BUTYRALDEHYDE	4-aminobutanal	1.32119e+06	1.2846e+06	1.34609e+06	955856	1.32948e+06	972188	1.30264e+06	1.2978e+06	792232	1073620	866652	847148	865816	861564	1.29193e+06	964516	1.23353e+06	879611	1.10109e+06	1.05766e+06	1079207	1.12131e+06	1.13455e+06	1157184	1.15101e+06	1.11182e+06	1.42285e+06	1.48071e+06	1329318	1.32976e+06	863498	1.21011e+06	1.27543e+06	1.24923e+06	1.0942e+06	753418	2.59662e+06	841811	3.53e+06	2498989	2.40213e+06	2.76407e+06	2.56158e+06	2.54664e+06	2.30463e+06	2666052	3853617	587562
4-AMINO-BUTYRATE	4-aminobutanoate	365951	317126	285181	296660	356835	425946	97968.4	62650	40052.5	61152	48185.2	50291	272147	296862	243385	266258	245194	215553	64481.2	48021.4	62752.3	64274.7	66272.2	118431	160483	224479	125579	148139	284703	239524	139997	139791	137838	117491	113513	85355.6	52864.4	60729.4	71817.2	72842.6	67967.9	67856.4	55646.5	52316.8	96620.4	80758.5	68412.5	68479
4-METHYL-824-CHOLESTADIENOL	4&alpha;-methyl-5&alpha;-cholesta-8,24-dien-3&beta;-ol	59769	59306.8	56152.3	60957.4	46955	49279.4	40943.6	41079.7	61542.2	60085.1	97492.9	102086	60005.9	54615.8	67125.4	62975.9	93972.8	88776	63181.5	60807.2	70026.2	74625.2	55870.1	58419.4	70986.3	70134.4	86880.8	86201.3	101937	105550	60621.5	56695.8	75516.1	76338.5	67319.5	63949.6	62474.3	61284.6	86883.1	92646.1	83350.2	77474	146376	147096	181554	180619	117161	119177
4-METHYL-MYO-INOSITOL	D-ononitol	48765.6	24989.5	46769.9	44705.9	17720	41797.6	1	11735.1	37722.5	37083.1	41363.8	50393.7	22890.2	41218	41122.1	43011.4	29630.8	24101.3	17517.6	39312.2	35744.3	43914	41676.5	30628.8	33926.1	33363.9	17005	53691.9	41660.9	42284.6	37797.2	31201.7	43081.2	36306.2	24325.7	17020.1	17666.5	35418.6	17387.8	10843.2	10546.8	34245	11367.3	29397.2	16378.2	17451	17124.9	12156.9
4-PHOSPHONOOXY-THREONINE	4-phosphooxy-L-threonine	103490	95246	92308.1	89988.8	81762.5	50653.6	87821.2	96303.9	108758	97180.4	108374	111168	91780	88619.4	97720.4	90116.5	94587	74804.6	112345	105432	124698	124074	82703.3	69159.8	126730	120099	88153.1	67262.7	97748.2	105586	94789.4	86495.2	101798	112637	100627	115388	113279	114569	96170.7	91258.1	67483.7	79830.9	112077	104615	99655.7	104617	95203.8	91412.8
5-ALPHA-CHOLESTA-724-DIEN-3-BETA-OL	5&alpha;-cholesta-7,24-dien-3&beta;-ol	1	1	37461.2	33256.8	19338.1	20033.6	20158.5	20059.6	23768.6	29386.3	55811	55730	39870.3	32108.7	30045	32812.1	52834	51578.8	29171.6	1	33402.7	34489.8	28460.7	29768.7	30770.9	31823.3	49270.1	48980.8	63874	63944.7	1	1	50378.8	51453.3	43122	35776.3	1	126516	35777.5	37123	38704.7	36268.4	17373.6	42166.3	47649.4	47779.2	46716.8	46560.1
5-AMINO-LEVULINATE	5-aminolevulinate	1	1	1	1	1	1	1	1	1	1	1	1	1	1	1	1	1	1	1	1	1	1	1	1	1	1	1	1	1	1	1	1	1	1	1	1	49715.9	51290.2	51365.8	57555.8	35258.5	42050.4	39571.2	37281.6	17560.5	17331.5	1	11572.7
5-AMINOPENTANOATE	5-aminopentanoate	3.6415e+06	3530721	3.30355e+06	3323063	2.98628e+06	3.23693e+06	1.96444e+06	1.77944e+06	4014064	4.31102e+06	4741673	4.82034e+06	2.86007e+06	3.02898e+06	3.22003e+06	3372386	5172679	5095992	2.28117e+06	2.15584e+06	2.31351e+06	2.28576e+06	2.02234e+06	2582710	2.06487e+06	2.08617e+06	2.36644e+06	2659389	2457760	2.23225e+06	2.7995e+06	2.80093e+06	2.88241e+06	2.76565e+06	2.75535e+06	2.42543e+06	2042481	2.12753e+06	2.15786e+06	2.34686e+06	1918379	1.88595e+06	1.3614e+06	1.32022e+06	2.42275e+06	2.3757e+06	1.20702e+06	1171972
5-HYDROXY-CONIFERALDEHYDE	5-hydroxy-coniferaldehyde	1	1	1	1	18154.5	22364.5	1	1	1	1	1	10766.2	1	1	31803.9	31507.4	67278.3	64082.8	1	1	1	1	1	1	1	1	1	10921.8	1	1	70930.2	64015.5	1	1	12174	11971	1	1	1	1	11246.4	17467.3	1	1	49906.2	40287.8	58438	57222.2
5-HYDROXYISOURATE	(<i>S</i>)-5-hydroxyisourate	246070	243654	406299	424456	326639	329977	90726.9	81029.3	238245	254187	275931	279176	421377	448507	433171	442268	459165	447528	233025	237264	213689	214572	226872	250661	143186	145458	296151	292927	234187	228019	388865	394845	233673	241677	335183	331788	106958	103869	112115	116896	115040	105703	39643.6	42644.2	58094.5	60915.5	62512.8	68698.1
5-HYDROXY-TRYPTOPHAN	5-hydroxy-L-tryptophan	505605	542378	309757	274005	1	1	1	1	140542	124487	1	114090	214514	230051	260260	273641	1	1	143219	155363	89015.1	95862.4	54334.9	1	1	1	1	1	1	1	77525.1	89329.1	1	1	1	110653	1	1	1	1	1	1	1	1	1	1	1	1
5-METHYLTHIOADENOSINE	<i>S</i>-methyl-5'-thioadenosine	110553	666550	789354	767664	418222	423006	116042	122416	70198.9	60973.3	571272	334643	1	561794	142966	777943	112891	621282	77009	289913	92799.1	99669.8	275438	275436	43633.9	302473	630132	611455	123899	135302	124633	728173	133009	133596	135193	126650	146493	316182	111410	113145	812046	755542	3684.24	21890	8993.45	113342	1.03961e+06	1.03932e+06
5-P-BETA-D-RIBOSYL-AMINE	5-phospho-&beta;-D-ribosylamine	11687.2	16337.9	1	1	12734.3	19906	1	1	11747.1	1	1	1	1	1	1	1	1	1	1	1	16665.2	19846.3	25970.9	18546.9	22273.6	18623.4	1	1	25123.8	17372.1	1	1	11572.4	1	17660.1	18135.6	44882.2	32902.4	39085	30972.8	77670.1	73487.5	75670.7	66292.2	82602.7	71220.8	78120.1	73741.7
5-PHOSPHORIBOSYL-N-FORMYLGLYCINEAMIDINE	2-(formamido)-N<sup>1</sup>-(5-phospho-&beta;-D-ribosyl)acetamidine	1	1	1	1	1	1	1	1	1	1	27030.1	26928.2	1	1	1	1	1	1	1	1	1	1	1	1	55504.1	49521.3	1	41250.3	1	1	1	1	1	1	1	1	1	1	1	1	1	1	1	1	1	1	39043	39659
5-P-RIBOSYL-N-FORMYLGLYCINEAMIDE	<i>N</i><sup>2</sup>-formyl-<i>N</i><sup>1</sup>-(5-phospho-&beta;-D-ribosyl)glycinamide	112505	109480	51308.1	43499.1	93746.9	89200.2	1	1	1	1	1	1	34087.3	36997.2	28458.7	30544.6	33663.6	20675.6	1	1	1	1	1	1	25623.3	16432.1	1	1	18008.6	11417	10584.1	1	27380.7	20157.4	1	10881.6	1	1	1	1	1	1	1	1	1	1	1	1
6AS11AS-36A9-TRIHYDROXYPTEROCARPAN	(-)-glycinol	107480	101635	40245.1	29710.2	65539.6	61541.8	64880	58605.1	28332.8	26453.5	14276.1	15361.3	40862.8	43617.1	31957.5	20344.7	26841.3	25250.6	32217.9	31667.2	41605.6	44122.4	29482.8	31624.9	38792.5	34700.6	17770.4	15420.4	38398.8	38922.3	23744.1	22895.2	39048.4	38796.8	37743.1	47054.4	22367.3	44889.7	35570	17268	1	1	66334	62702	48776.4	42729.6	11513.8	18260.4
6-O-BETA-D-XYLOPYRANOSYL	primeverose	103402	57958.9	175525	121765	54663.6	67247.5	12752.7	11865.3	42113.7	56840.4	169425	152455	80794.1	136585	135168	135098	119956	117908	52508.2	47125.3	47444.1	33406.8	44970.7	35033	87203.9	107634	247072	252011	352564	356666	143209	139464	103832	119197	54359.8	98828.9	12076.7	108186	108005	106059	16839.4	119914	55119.9	54269.7	14204	29032	53982.6	60696.1
6-O-METHYLNORLAUDANOSOLINE	(<i>S</i>)-6-<i>O</i>-methylnorlaudanosoline	232147	240252	223344	231460	246050	248609	290736	292720	271692	272057	269852	259957	246966	251715	226518	233817	235174	228887	258696	276599	282175	280077	281138	283664	245345	241774	249427	234127	247708	239812	244673	238549	243103	233439	241977	235451	186494	194746	209806	198540	195784	197720	221284	210039	220881	212684	197986	185624
7-8-DIHYDROPTEROATE	7,8-dihydropteroate	1	64399.6	67442.1	70258.8	28357.8	29417	1	1	1	1	10925.7	1	64441.7	67922	61798.1	54808.5	52028	56125.9	1	1	1	1	1	1	1	1	1	1	12592	17191.2	40636.4	42474.7	31038.7	33076.4	45250.1	40413.7	1	1	1	1	1	1	1	1	1	1	1	1
7-O-ACETYLSALUTARIDINOL	7-<i>O</i>-acetylsalutaridinol	19708.5	13746.3	34077	16541.6	1	1	1	1	16883	15967.4	27264.1	27817.7	11508.4	10569.7	1	1	31433	11358.2	58352.2	11410.8	10790.6	10334.1	52903.5	30575.6	83746	73748.1	31789.4	32729.9	125577	128026	20045.7	24524.8	25208.1	29249.7	11009.6	23294.5	34549.5	109474	93341.5	103371	121526	112331	87771.6	90729	181213	178706	284011	278820
91018-TRIHYDROXYSTEARATE	9,10,18-trihydroxystearate	1	1	122173	11171.5	54387.1	56411.7	16265.9	16049.2	68922.8	63868.5	130058	128445	107061	114170	1	1	109371	117333	75779.3	77142.8	75124.3	75503.9	73783.4	79707.3	1	1	114484	22807.9	64082.6	67246.8	123439	118594	91584.6	95666	95121.2	80804.6	17013.9	10763.5	25319.6	11912.3	30744.3	24717	12162.1	18322.7	34553.3	43080	14248.1	19493.1
ACETOL	hydroxyacetone	1.10155e+06	1104449	2.00594e+06	2.05829e+06	867760	879256	1.19135e+06	1.21741e+06	1013144	1.02952e+06	1.67665e+06	1.6491e+06	1524773	1.63458e+06	1.71157e+06	1.7412e+06	1.64889e+06	1.6247e+06	919226	883599	763759	743560	1.02413e+06	1127975	1.73663e+06	1.74796e+06	2.20415e+06	2.38565e+06	1141957	1.11602e+06	2826266	3.2843e+06	1290920	1.23913e+06	1.1494e+06	1134825	541407	531622	604848	597874	1.51387e+06	1.5659e+06	393134	336766	703951	702245	2.05395e+06	2.17544e+06
ACETYL-COA	acetyl-CoA	18809.3	18872.5	18834.5	19949.2	1	1	1	1	17183.5	16187.7	1	36126.4	19227.5	18654.2	19602.1	13236	29610.4	31186.5	11527.1	12569.9	18660.6	20633.8	11605.1	12267.4	21652.2	24309.9	27283.6	23867.2	1	1	28512.5	29011.8	22801.8	28863.3	12919.6	20648.6	40415.7	31682.8	25045.5	20500.6	19711.4	18585	29669.6	23802	28865.4	22283.5	28019.8	26780.5
ACETYLSERINE	<i>O</i>-acetyl-L-serine	8.26075e+06	7948930	8396907	8237656	7.83202e+06	8.33132e+06	5377331	4929031	8987628	9913299	8453935	8636078	8988376	9419010	9411130	9630780	9689106	9510883	9373684	8651908	8.21274e+06	8244613	7.6056e+06	8783456	6336578	6163397	8433359	8968831	8.20844e+06	7.82901e+06	6731026	6629417	7.40392e+06	7.04584e+06	7592793	6817775	2905650	3.10513e+06	3.09569e+06	3.28081e+06	2776993	2.73185e+06	2.2247e+06	2.16642e+06	1.54722e+06	1.5152e+06	1.08867e+06	1.06235e+06
ADENINE	adenine	700159	650437	742043	718771	591865	569916	276639	283049	56893	53025	653072	651253	373119	383748	574577	594515	117408	269564	31470.9	53271.9	35151.4	34446.7	40916.7	42942	391880	413718	573673	603365	1.23793e+06	1.23949e+06	384503	395580	64953.3	76658.2	48699.3	64697.9	81370.4	88466.1	98228.7	291374	382063	399272	210095	222697	342022	326965	395075	394156
ADENINE-RING	adenine-ring	700159	650437	742043	718771	591865	569916	276639	283049	56893	53025	653072	651253	373119	383748	574577	594515	117408	269564	31470.9	53271.9	35151.4	34446.7	40916.7	42942	391880	413718	573673	603365	1.23793e+06	1.23949e+06	384503	395580	64953.3	76658.2	48699.3	64697.9	81370.4	88466.1	98228.7	291374	382063	399272	210095	222697	342022	326965	395075	394156
ADENOSINE	adenosine	2.42906e+06	2.45347e+06	2.66166e+06	2.53276e+06	2.00033e+06	2.00659e+06	954194	954034	482948	475705	889542	907318	1.33437e+06	1.37915e+06	2.14742e+06	2.22393e+06	945659	941387	478679	1	574135	566420	503827	499421	1.38095e+06	1.33367e+06	2.19694e+06	2140703	4.34107e+06	4317624	1.53109e+06	1.51583e+06	919374	889627	867119	872361	1.29297e+06	1.23965e+06	1.24172e+06	1.24442e+06	1709707	1.72852e+06	887551	920985	1.47044e+06	1.39364e+06	1.75545e+06	1.76503e+06
ADENOSINE_DIPHOSPHATE_RIBOSE	ADP-D-ribose	210745	216654	195651	192250	162761	168685	140803	145013	184551	181057	279993	266394	183952	184278	211399	206307	275480	258973	186303	187183	206346	217739	182547	186841	251385	253004	232065	222187	356791	350270	237114	250693	248605	255172	217078	216699	238078	255102	185815	194417	186560	189836	235811	236961	235448	213736	203856	192069
AGMATHINE	agmatine	1	167224	1	1	1	74552.4	1	54453.8	1	1	127094	132295	1	165728	16897.6	1	11143.9	2572.8	884.453	1	113387	1	10614.2	11008	128592	1	1	10984.4	11034.3	1	74485.4	1	155515	1	4638.68	1	1	1	1	338557	1	1	1	1	1	1	1	1
AICAR	5-amino-1-(5-phospho-D-ribosyl)imidazole-4-carboxamide	85478.6	89541.4	68577.7	57927	34599.9	32454.4	1	1	48648.5	40741.4	57374.3	56090	54530.5	52709.9	43895.4	43905	49531.5	57835.8	44372.8	43212.9	63712.4	66200.2	31124	30958.4	1	1	64179.8	61648.8	61250.6	64203.8	52657.7	56696.8	43029.1	38048.4	25576.1	31275	1	1	1	1	1	1	1	1	1	1	1	1
ALLANTOATE	allantoate	301574	292754	311570	283708	250106	234123	288467	304705	359775	471868	338171	445740	287183	281562	304338	295752	294562	250078	345111	324668	387174	376527	254557	225736	403650	375943	249034	217173	367333	341776	305791	316064	381422	358262	332922	367335	431403	425523	346832	350826	264210	273967	419566	392030	341306	350651	346286	341631
ALL-TRANS-PENTAPRENYL-DIPHOSPHATE	geranylfarnesyl diphosphate	61739	60750.4	66672.4	68226.1	41276	39359.4	1	1	52082	43306.9	74290.4	72127.9	53685.2	51973.9	102097	104131	58888.8	57854	36339	41765.5	38197.4	38163.6	50495.7	44583	16065.9	10946.4	53877.1	53453.3	27305.1	21870.1	170170	179031	148582	161503	130882	143936	59866.5	58077.7	70737	62839	11041.6	98323.5	55301.1	58681.7	74700.1	76369.2	104821	109404
ALLYSINE	(<i>S</i>)-2-amino-6-oxohexanoate	29253.3	19144.3	11725.7	16356.3	1	1	1	1	1	1	1	12110.5	12814.4	16693.1	17736.4	11391.3	1	1	1	1	1	1	1	11369.9	17816.6	16982.1	16749.7	16789.1	1	1	12861.3	11693.7	1	11532.5	1	1	1	1	1	1	1	1	1	1	1	1	1	1
ALPHA-D-GALACTOSE	&alpha;-D-galactopyranose	820412	878758	1.25882e+06	1.22293e+06	310300	65275.3	47496.3	26202.3	2134499	985698	107029	907661	1.14597e+06	639575	1.17112e+06	1.20168e+06	1.01073e+06	987522	296172	249093	268654	180608	132094	186752	81539	127229	1	133984	132312	119542	407991	519398	388860	31467.5	350478	353424	1167135	1.00522e+06	1.04997e+06	961638	1099263	1.07598e+06	1.39765e+06	1.39441e+06	1.36252e+06	1.41268e+06	1.58136e+06	1.51725e+06
ALPHA-GLUCOSE	&alpha;-D-glucopyranose	820412	878758	1.25882e+06	1.22293e+06	310300	65275.3	47496.3	26202.3	2134499	985698	107029	907661	1.14597e+06	639575	1.17112e+06	1.20168e+06	1.01073e+06	987522	296172	249093	268654	180608	132094	186752	81539	127229	1	133984	132312	119542	407991	519398	388860	31467.5	350478	353424	1167135	1.00522e+06	1.04997e+06	961638	1099263	1.07598e+06	1.39765e+06	1.39441e+06	1.36252e+06	1.41268e+06	1.58136e+06	1.51725e+06
ALPHA-METHYL-5-ALPHA-ERGOSTA	4&alpha;-methyl-5&alpha;-ergosta-8,14,24(28)-trien-3&beta;-ol	126741	118218	187539	198081	282171	284959	18310.4	18674	28361.5	24556.2	94571.5	83772.7	43001.1	1	25891.5	55857.9	211381	207267	62600.3	49687.7	17956.1	16977.3	82662.6	33557	25958.1	25221	147799	1	1	1	146073	145414	43479.1	122565	94413	35805.2	11492.9	16761.1	74142.2	18681.1	68776.9	69335.5	49833.8	56472.6	189908	64573.5	198675	167367
ALPHA-TOCOPHEROL	&alpha;-tocopherol	1.7928e+06	1837580	1.64232e+06	1.64455e+06	1.38133e+06	1.2032e+06	1.27491e+06	1.22547e+06	1.49019e+06	1.56316e+06	2444559	2.50786e+06	1	17773.4	1.76298e+06	1.87746e+06	2.29991e+06	2.33366e+06	1.68104e+06	1	1.83034e+06	1.77947e+06	1.65463e+06	1.6022e+06	1.87949e+06	1.8857e+06	2.09855e+06	2148906	2.69938e+06	2.68615e+06	1.95422e+06	1.96836e+06	2.21063e+06	2250194	1.88e+06	1.93131e+06	2.92958e+06	2281916	39651.8	2167560	2.06787e+06	1.99464e+06	2116816	2.06408e+06	2.06476e+06	2.10789e+06	2.29353e+06	2.26232e+06
AMINO-RIBOSYLAMINO-1H-3H-PYR-DIONE	5-amino-6-(D-ribitylamino)uracil	1	1	10490.5	16262.9	1	1	1	1	32172.3	24297.4	26001.8	78765	1	1	1	27550.8	1	1	67390.3	70483.5	60481.1	61380.9	55693.8	52194.4	1	1	1	1	1	1	52706	51467.6	52851.8	53632.8	46068.9	50431	1	1	11073.1	1	23315	22533.7	1	1	29427.2	26665	50188.6	51179.1
ANDROST4ENE	androst-4-ene-3,17-dione	1	1	1	1	1	1	1	1	1	1	31707.4	34885.8	1	1	13498.4	17998.6	16210.2	11049.9	11642.7	17283.2	1	1	1	1	51306.3	54211.4	37126.8	30473.4	1	1	11910.1	17026.9	1	1	1	1	1	1	1	1	1	1	1	10659.5	1	1	1	1
ANTHRANILATE	anthranilate	303775	302863	204486	192471	157708	142697	57234.6	60194.1	68371.8	51995	77895.2	74988.6	106100	113692	135744	144856	122281	112259	56200.3	65574.6	32549.1	29679.7	1	1	131813	122953	124544	1	116011	109940	95615.3	105094	79822.6	69925.5	62519.3	66971	1	1	1	1	1	1	1	1	1	1	22461.3	31724.4
ARACHIDONIC_ACID	arachidonate	178118	142871	21682.6	89532	137363	67339.7	59104	21174.5	119525	105965	192961	201562	153928	139150	10787.6	106192	148334	12026.6	45693.3	22991.3	10684.7	159758	48715.4	140044	225324	231719	239353	187131	1299370	1.18146e+06	74608.7	63741.1	177465	235960	153748	162190	135681	151800	152321	144365	207373	204399	55951.6	11863.4	238272	11788.7	270511	284495
ARG	L-arginine	578552	605428	629626	663410	669699	663005	692218	655146	467229	664161	632750	688804	663808	656595	616774	593935	651480	649489	685898	705643	737162	760947	521979	706465	615363	617341	603422	667538	649420	605723	595993	618441	603407	620269	624788	637693	657885	720531	615342	637124	653681	663598	675948	648507	692824	671534	697605	767529
ASN	L-asparagine	193274	185796	209228	207777	373024	400924	140315	111002	150176	1	154031	153051	200725	216618	235650	239699	218636	222703	177831	160666	160541	156183	163038	212698	190227	185167	201803	210468	213888	194141	144081	138827	163745	150753	172839	162264	1	130883	134374	145314	118652	119289	91175.3	88587.6	49304.2	54334.8	22807.9	22445.5
BENZALDEHYDE	benzaldehyde	45920.7	50090.6	51198.6	51536.3	31797.7	33488.1	29690.3	33183.6	46128.3	69445.3	47870.9	67889.7	42863.5	1	40683	1	47329	47284.6	51488.3	44929.9	57574.7	64644.2	49940.4	52164.4	31050.2	29586.3	58260.8	54695.2	51326.5	48265.6	1	51276.2	61726.1	68443.4	48745.8	44240	53202	42853.6	53527.2	53304.4	47158.9	49627.3	39251.6	40894.7	54699.7	50999	42655	60048.1
BENZOATE	benzoate	1	1	1	1	36317.6	23137.9	99389.6	30720	1	1	1	1	1	1	1	1	1	1	11258.8	1	1	11088.2	1	12313.8	26540.6	54490.6	1	1	1	11054.5	1	1	1	1	1	1	1	1	1	1	1	1	1	1	1	1	1	1
BENZYL-ALCOHOL	benzyl alcohol	1	1	20125.6	12778.6	1	1	1	1	1	1	27598.6	20614.5	1	1	1	1	25926.5	27928	22837.2	11132.7	1	1	1	1	1	1	22641.8	27914.3	17759.1	17085	16732.5	1	1	16769.5	10461.5	1	30133.3	28082.6	28725.2	33424.4	41602.1	40827.7	38537.5	40461.2	57398.9	46010.5	59493.1	59844.5
BERBERINE	berberine	1	1	1	1	25323.9	1	1	1	1	1	1	1	1	1	1	1	1	1	1	1	1	1	1	1	1	1	1	1	40481.3	1	1	1	1	1	1	1	1	1	1	1	1	1	1	1	10893	16537.8	1	1
BETA-D-FRUCTOSE	&beta;-D-fructofuranose	820412	878758	1.25882e+06	1.22293e+06	310300	65275.3	47496.3	26202.3	2134499	985698	107029	907661	1.14597e+06	639575	1.17112e+06	1.20168e+06	1.01073e+06	987522	296172	249093	268654	180608	132094	186752	81539	127229	1	133984	132312	119542	407991	519398	388860	31467.5	350478	353424	1167135	1.00522e+06	1.04997e+06	961638	1099263	1.07598e+06	1.39765e+06	1.39441e+06	1.36252e+06	1.41268e+06	1.58136e+06	1.51725e+06
BETAINE	glycine betaine	3.6415e+06	3530721	3.30355e+06	3323063	2.98628e+06	3.23693e+06	1.96444e+06	1.77944e+06	4014064	4.31102e+06	4741673	4.82034e+06	2.86007e+06	3.02898e+06	3.22003e+06	3372386	5172679	5095992	2.28117e+06	2.15584e+06	2.31351e+06	2.28576e+06	2.02234e+06	2582710	2.06487e+06	2.08617e+06	2.36644e+06	2659389	2457760	2.23225e+06	2.7995e+06	2.80093e+06	2.88241e+06	2.76565e+06	2.75535e+06	2.42543e+06	2042481	2.12753e+06	2.15786e+06	2.34686e+06	1918379	1.88595e+06	1.3614e+06	1.32022e+06	2.42275e+06	2.3757e+06	1.20702e+06	1171972
BETAINE-ALDEHYDE-HYDRATE	betaine aldehyde hydrate	1	1	1	1	1	1	1	1	10843.3	1	1	1	1	1	1	1	1	1	10594.4	1	12564.7	17548.5	19002.4	11741.2	1	1	1	1	1	1	1	1	23071.7	17951.5	1	1	1	1	1	1	1	1	1	1	1	1	1	1
BETA-TOCOPHEROL	&beta;-tocopherol	1	1	23270.4	111766	155585	137368	141737	120284	28725.7	105603	84272	50046.3	116218	105515	120934	131451	103350	117172	1	24402.9	108553	24723.7	110595	125374	94568.2	100805	87895.2	36411.8	48800.9	50065.6	1	1	120460	115499	118733	123147	1	1	20456.5	107171	101285	102406	110554	110057	83331.2	1	26109.4	66580.1
BILIRUBIN	(<i>Z,Z</i>)-bilirubin-IX &alpha;	1	1	1	1	1	1	1	1	1	1	1	1	1	1	1	1	1	1	1	1	1	1	1	1	1	1	10738.4	1	16476.2	17646.1	1	1	1	1	1	1	1	1	1	1	1	1	1	1	124251	116310	104942	99474.8
BILIVERDINE	(<i>Z,Z</i>)-biliverdin-IX &alpha;	618629	625560	639486	872205	621445	625594	305698	313084	505545	507443	582763	215795	546827	573607	599084	618321	581972	576709	496681	477060	513077	520252	540410	549314	512782	516372	543374	651965	618801	598299	596624	576303	613056	603773	509695	499568	558954	571132	574787	591710	511647	511331	628409	596282	764669	577058	754656	798653
BISOHMYR-GLUCOSAMINYL-1P	lipid X	516206	499844	746424	789358	299610	294145	270833	253328	765809	752091	1.05016e+06	1.05007e+06	795222	701919	479420	490303	624723	637345	736387	787008	764309	780633	793792	833188	902708	936527	1.86018e+06	1.82162e+06	1.32014e+06	1.32265e+06	849861	855610	620422	661053	584819	547403	1.46794e+06	1.30527e+06	1.54384e+06	1511238	1.77014e+06	1.81572e+06	1.19511e+06	1.13721e+06	1.99945e+06	2.04272e+06	3.28836e+06	3.14151e+06
BUTANAL	butan-1-al	1	545146	578344	585497	417388	477846	291115	273130	723242	748532	875974	866764	661799	741727	770165	1	812245	802891	869258	839555	1.27906e+06	1.31602e+06	1.42388e+06	1.61392e+06	370672	1	726329	668166	822843	1	926024	971609	1.31848e+06	1.18426e+06	1.10784e+06	1.1561e+06	852174	862805	865258	885387	837480	814493	934776	922396	869171	856146	817862	816404
CAFFEOYLQUINATE	<i>trans</i>-5-O-caffeoyl-D-quinate	105335	109249	56586.2	56054.3	74241.2	74773.7	60512.4	53540.2	42880.9	40680.3	16747.5	16654.2	56478.3	54531.5	40803.3	35794.3	38742.3	57105.5	41345.2	41167	52145.2	51264.9	47504.1	54425.2	37174.5	29748.5	25960.3	23008.7	35449	33098.5	58405.4	57981	102954	89686.3	75911.8	89309.3	65448.1	69952.6	47399.3	34535.4	27599	16161.7	103051	103459	109618	109950	24539.6	24093.6
CAMP	cyclic-AMP	1	1	1	1	1	1	1	1	1	1	1	1	1	1	1	1	1	1	1	1	1	1	1	1	29231.3	30597.5	27198.1	27357.5	1	1	1	1	1	1	1	1	1	1	1	1	1	1	1	1	1	1	1	1
CANAVANINE	L-canavanine	1	1	1	1	1	1	1	1	1	1	1	1	1	1	1	1	1	1	1	1	1	1	1	1	21895.5	25817.5	17090.6	12116.4	1	1	1	1	1	1	1	1	1	1	1	1	1	1	1	1	1	1	1	1
CATECHOL	catechol	53961.7	52078.3	61706.9	62215	63621.3	60354.8	27745.6	26562.6	41387.7	45952.5	51814.4	48410.1	59188.9	65126.1	70892.1	69306.3	76545.6	68490.6	52895.6	50899	41151.4	45632.7	23299.6	37372	92291.5	81601.5	50422.9	51921.5	24181.9	29687.5	67776.6	68719.7	51192.4	44317	49598.9	55545.6	1	1	1	1	1	1	1	1	1	1	1	1
CH33ADO	5'-deoxyadenosine	35661.8	29409.6	1	1	1	1	1	1	1	1	1	1	1	1	1	1	1	1	1	1	1	1	1	1	1	1	20645.8	19879	17030.4	12257.1	1	1	1	1	1	1	1	1	1	1	1	1	1	1	1	1	1	1
CH3-MALONATE-S-ALD	(<i>S</i>)-methylmalonate-semialdehyde	1	1	1	1	97324.2	239865	1	74321.7	1	1	1	1	1	1	1	94915.5	38209.7	22181.6	1	38126.3	1	32837.3	1	130872	25201.5	280626	1	1	139422	80129	1	1	51717.6	1	1	155757	1	9858.41	48409.6	1	34262.4	11097.3	22565.5	31028.5	4191.51	1	1	36470.8
CHLOROPHYLL-A	chlorophyll <i>a</i>	1	1	1	1	1	1	190745	366661	1	1	1	1	1	1	1	1	1	1	1	1	79427.6	69001.4	95943.4	1	1	1	1	1	97988.6	99656.9	1	32100.8	1	1	1	1	1	1	127235	125452	1	86552.9	112276	111825	1	58766.8	1	1
CHLOROPHYLL-B	chlorophyll <i>b</i>	118173	107583	65784.7	121696	3.97601e+06	898466	2.07619e+06	2.37044e+06	750845	828701	466021	484853	130707	3.97735e+06	104980	98817.4	105444	104315	843395	912982	1.20733e+06	977759	960216	1.17451e+06	34197.2	1194209	300887	402418	498178	453784	2.49186e+06	49703.7	156620	161758	160561	161492	1074641	1.04276e+06	118182	99644.4	3.72021e+06	3818284	907350	903177	3.6187e+06	3.64843e+06	3.39317e+06	3.49414e+06
CHOLESTEROL	cholesterol	1	1	1	1	1	1	37720.1	46486.2	1	1	1	1	1	1	1	1	1	1	1	1	1	1	74038.6	1	1	1	1	1	1	1	1	1	1	1	1	1	1	1	126382	76248.1	1	120510	1	1	1	1	1	1
CHOLINE	choline	10457.6	16076.6	36615.2	37391.2	1	1	1	1	1	1	22691.8	20727.6	1	10329.5	10454	11586.8	1	1	1	1	1	1	1	1	1	1	1	1	1	1	23525.9	23799	1	1	1	1	11812.1	17029.1	16722.6	18480.9	45730.3	38267.2	96925.6	89129.6	196448	207286	171951	175353
CINNAMALDEHYDE	cinnamaldehyde	24872.6	24209.7	1	1	31535.1	29662.7	19277	16360.2	20466.2	24771.7	1	37975.2	11185.4	11020.5	10916.6	1	1	1	19969.8	29548.3	1	1	13062.6	11734.6	16462	18025	16459.3	1	11066.6	11575.4	1	1	10897.7	1	12412.5	1	11671.7	1	1	1	1	1	1	1	1	1	1	1
CINNAMYL-ALC	cinnamyl alcohol	59330.8	55335.8	50588.5	55366.5	31777.1	42950.6	19612.1	18790.3	40753.4	50469.3	45124.9	46088.7	51195.5	50144	53165.9	46610.2	51217.4	50432.3	33788.4	34596.1	38525.3	43853	32591.3	44822.8	1	1	53564.9	56206.2	48036.9	39352	52073.5	53179.2	54827.5	48075.2	42855.4	41668.7	18811	17863.8	14512.2	21974.1	18418.2	11970	12791.5	12418	29091.5	28391.4	20718.7	24187.1
CIS-3-HEXENAL	(Z)-3-hexanal	10464806	10577550	13184967	13146005	9963590	9977692	6.58711e+06	6663947	12748957	13363555	11547923	11766241	13433927	13695894	13060204	8920183	8976039	12564647	10332445	6.42567e+06	11027071	6953342	11261309	11238471	11283423	11280329	13542861	8801163	12673602	12416208	9655358	9722772	13335887	8442561	11801267	11684069	7080640	7118674	8.10254e+06	8.06752e+06	6.59143e+06	6492763	2.1952e+06	2.19119e+06	7476882	7.39996e+06	5.58602e+06	5936456
CIS-3-HEXENOL	(3Z)-hex-3-en-1-ol	1	1	10563.6	16765.1	10259.8	16828.5	1	1	1	1	1	17353.6	6137.95	10346.2	10625.1	33234.4	1	49987.5	1	29946.2	44881.3	1979.34	1	1	10577.7	1	1	1	1	28056.6	22955	1	1	10352.3	1	1	27650.4	1	44541.9	16591.9	16301.9	5648.87	42194	21423.9	10562.7	21879.6	11032.5	21471
CIS-ACONITATE	<i>cis</i>-aconitate	1	1	15448.8	17733.8	1	1	1	1	16341.5	22984.9	28816.8	29316.9	13408.7	13727.9	17346.3	23290	18552.4	21256.8	10777.8	1	1	1	1	1	1	1	25733.3	24695.6	1	1	25626.9	22325.7	1	13011.2	1	1	1	1	1	1	1	1	1	1	1	1	1	1
CMP-KDO	CMP-3-deoxy-&beta;-D-<i>manno</i>-octulosonate	330269	330499	299314	292995	257934	252838	213237	224527	282471	285429	423979	407161	292337	286672	322257	319363	425103	401271	280252	291329	329769	343728	279671	295455	388010	389907	351770	346701	533966	526173	376664	372448	385866	387629	331306	321747	382674	385026	289798	300547	298786	301382	360543	368527	349189	335647	301840	293187
CO-A	coenzyme A	19426.7	20023.4	18303.9	18496.7	1	10943.5	1	1	18255	11931.5	37112.9	35186.5	11422	19250.2	20537.3	20715.4	34248.7	31967.6	18418.6	11428.3	28174.9	22637.6	22764.9	11636.5	32519.7	26611.4	31042.3	29215.4	69174.3	59203.3	28861	30989.8	32912.5	25218.9	26669.7	21143.2	17810	31061.6	1	10841.9	1	11897.2	22991	29195.3	28568.3	26901	19202.8	21406.9
COA-GROUP	a coenzyme-A group	19426.7	20023.4	18303.9	18496.7	1	10943.5	1	1	18255	11931.5	37112.9	35186.5	11422	19250.2	20537.3	20715.4	34248.7	31967.6	18418.6	11428.3	28174.9	22637.6	22764.9	11636.5	32519.7	26611.4	31042.3	29215.4	69174.3	59203.3	28861	30989.8	32912.5	25218.9	26669.7	21143.2	17810	31061.6	1	10841.9	1	11897.2	22991	29195.3	28568.3	26901	19202.8	21406.9
CODEINE	codeine	1	1	1	1	1	1	1	1	1	1	1	1	1	1	1	1	1	1	1	1	1	1	12894.6	18484.2	1	1	1	11506.4	1	1	1	1	1	1	1	1	1	1	1	1	1	1	1	1	1	1	1	1
CODEINONE	codeinone	587539	610596	243900	245549	143628	134587	143081	142116	216402	201056	313753	318443	212860	201804	195151	203333	326603	317598	261187	262411	187670	191555	175078	182087	253318	285241	253369	258915	285871	295730	499270	487348	271510	263755	200166	207359	359953	415700	182826	181239	176468	177933	247088	248174	220481	223982	215110	213806
CONIFERYL-ALCOHOL	coniferyl alcohol	749262	745228	481501	1	404298	398873	180727	167482	163067	150825	1	1	292115	312382	382318	403327	32132.1	1	175889	177506	104567	104497	53804.1	28826.6	173062	175816	118810	122195	94122.8	100654	1	206916	183970	21909.6	1	153863	1	92280.4	75934.9	39302.2	98854.6	87925.6	78092.1	85885.9	151654	147385	195467	217003
COPROPORPHYRINOGEN_III	coproporphyrinogen III	209212	208550	322310	327963	163377	171564	46471.2	35026.4	72826.6	70265.8	136371	60398.5	305692	290542	281388	170006	255517	254898	72184.6	29535.7	11620.8	32749.3	58826.9	57653.5	171319	185993	88312.3	30030.5	16356.6	16993.9	362215	362773	91796.3	93966.5	72855.1	76479.8	330511	338390	319437	303838	412526	410260	628138	638772	505420	495850	660043	651503
CORTISOL	cortisol	523803	564513	689208	676641	357314	393053	130635	125427	445228	391182	613785	608107	503676	543147	549943	560001	506187	503838	451083	430641	474897	472646	409597	389375	280784	237218	566672	591880	360790	393453	594756	605544	568030	560683	449687	442781	263433	270458	265440	291788	366558	365684	253716	256214	272510	274267	458889	490554
CORTISONE	cortisone	1	1	1	1	1	1	1	1	1	1	1	1	1	1	1	1	21273.3	33828.3	1	1	1	1	1	1	1	1	11246.7	1	1	1	30043.6	24935.3	1	1	1	1	1	1	1	1	1	1	1	1	1	1	30220.4	30965.1
COUMARALDEHYDE	4-coumaraldehyde	410003	399745	418098	423395	383453	403051	262107	225785	443752	489232	437196	437582	443964	1	462728	470680	474806	472120	454210	420417	400315	412483	368404	440261	294021	313292	414499	453320	413985	401067	328403	331075	379632	351476	369599	349673	137734	143681	146439	157058	130857	126100	111213	106810	74987.4	74021.3	45515	41718.2
COUMARIN	coumarin	31629.9	34022.8	20382.3	19660.4	22361.8	19744.2	1	1	25044.7	25851.5	21091.8	22452.5	17744.3	17909.1	11402	28271.8	18147.4	11227.3	21428.9	22893.2	23328.5	30251.4	24272.3	24892	1	1	17851.6	16910.5	12776.8	12219.8	65030.3	13034.6	12485.1	12528.8	11479.9	10987.1	19455	17104.8	25041.6	22979.2	29021.1	23027	26709.8	150524	137512	293168	400888	154956
COUMARYL-ALCOHOL	4-coumaryl alcohol	168134	1.1108e+06	1	1	848291	12706.5	1	1	1	1	1	1	1	11700.8	1	18285	815030	12646.1	1	1	1	1	1	1	434946	426113	584959	590819	548974	533912	185650	405864	828319	823807	1	720882	1	1	18270.4	24646	16501.9	316226	10929.5	179908	191177	168482	75394.7	153138
CPD0-1028	2-<i>cis</i>,6-<i>trans</i>,10-<i>trans</i>-geranylgeranyl diphosphate	31619.1	29618	63304.4	67476.3	1	1	1	1	40970.9	39539.1	133036	119162	54423.7	57788.8	53501.8	45678.2	82181	86247.7	47812.2	53046.7	55568.8	49723.4	63583.1	62416.8	1	1	97988.4	88848.3	28935.4	18559.8	142408	142887	59967	64843.8	61358.1	55350.3	1	1	1	19118.3	73662.3	70560.8	1	1	54021.2	60400.8	131965	128885
CPD0-1163	(S)-3-hydroxy-(5Z)-tetradecenoyl-CoA	1	1	1	1	1	1	1	1	1	1	1	1	1	1	1	1	27545.2	21191.2	1	1	1	1	1	1	1	1	1	1	22026.9	1	1	1	10962	1	1	1	27938.3	10443.5	15744.3	1	1	1	1	1	1	1	1	16568.1
CPD0-1240	monofluoromethylornithine	25917.3	23262.4	34400	38401.2	22935.6	24837.4	1	1	32021.8	26458.7	51305.2	50572	31020.8	33054.8	24594.3	27925	33777.7	37150.6	30901.8	33409.7	36044.9	43148.7	34390	30869.4	13443.8	18940.5	41634.6	43775.6	32860.7	31923	35881	35862.2	32365.6	31063.5	33568	30533.1	1	1	1	1	11880.2	11250.1	16896.7	1	11526.4	11468.6	42029.5	11628.9
CPD0-1422	dipalmitoyl phosphatidate	444048	432297	1.14428e+06	1.18067e+06	582814	315281	286180	292763	69536.4	122809	671272	680054	532751	638017	491980	642469	1273815	856397	401899	368885	52209.9	41627	340836	319766	554279	468096	746448	784013	766548	849552	1.01119e+06	682169	921726	623025	582560	1.10607e+06	1.34427e+06	1.38336e+06	456330	1.70416e+06	1262165	1.17684e+06	628843	621216	975355	1.0975e+06	484528	1370946
CPD0-1660	&alpha; -ethynylagmatine	29642.7	33230.3	28782.6	34459.6	29088.5	36086.2	17381.9	17852.2	18775	26320.1	17962	24511.1	38370.7	42040.2	37453.5	36727.4	1	36123.4	25009.6	24629.2	19294.9	24962.8	23830.4	35135.3	34296.4	36227.6	37039.5	30199.4	36918.2	1	36119	35021	36671.4	30415	1	34966.5	31065.8	24043	24050.4	18426.1	23555.4	23007.4	28120.1	26507.1	27232.5	30083.9	27761.2	19895.6
CPD0-1661	&alpha;-monofluoromethylagmatine	1	20224.2	1	1	1	1	1	1	1	1	1	29354.1	3298.6	7992.67	1	21932.2	1	1	1	1	26781.7	18081.4	1	1	1	1	25907.9	12631.4	1	1	4805.33	1	1	23435.5	26784.1	1	1	26260.5	1	16968	10733.5	10134	29728	24147.2	1	1	17910.1	33504.3
CPD0-1662	&alpha;-monofluoromethylarginine	1.05764e+06	1.00174e+06	1.00913e+06	1.03352e+06	1.03651e+06	1.11552e+06	1.1651e+06	1.13051e+06	1.09362e+06	1.0945e+06	1.04228e+06	1.03833e+06	1.03391e+06	1.03235e+06	1.04566e+06	1.1043e+06	1.02741e+06	1.04092e+06	1.07299e+06	1.0386e+06	1.11349e+06	1.1152e+06	1.16501e+06	1.13486e+06	1.07449e+06	1.06954e+06	1.04539e+06	982156	1.05512e+06	1.01873e+06	1.06616e+06	1.0131e+06	1.12054e+06	1.07616e+06	1.07182e+06	1.10908e+06	985288	971386	943802	954308	937495	939195	1.04421e+06	1.04197e+06	947401	956323	864798	854818
CPD0-1663	&alpha;-difluoromethylarginine	1	1	1	1	1	1	1	1	1	1	1	1	1	1	1	1	1	1	1	1	1	1	1	1	1	1	1	1	1	1	1	1	1	1	1	1	16788.1	16937.1	14411.6	17343.1	1	1	15427.4	14527.4	1	1	1	1
CPD0-1905	8-oxo-dGTP	598351	561369	1.00634e+06	979681	1.07547e+06	986261	900407	905413	1.11968e+06	1.15966e+06	1.41049e+06	1.30705e+06	862467	997581	1.19183e+06	1.20981e+06	1.50222e+06	1480030	825307	710789	1.59489e+06	1.61764e+06	1.47112e+06	1.41958e+06	878392	638340	1.82563e+06	1.78874e+06	2742678	2696220	673205	702303	1.53426e+06	1.51892e+06	1.60165e+06	1.61282e+06	849627	958191	1233328	1.2421e+06	1.63411e+06	1.65883e+06	892027	847420	1.46821e+06	1.51698e+06	1.43962e+06	1.46236e+06
CPD0-2298	(<i>S</i>)-ureidoglycine	29617.6	24677.9	169453	155187	279095	19088.7	12667	238460	210169	84148	157466	112226	22029	22957.7	28614	32865.3	96844.6	99916.1	31831.6	28972.4	196030	31537.4	25417.8	27678.1	175175	169782	200002	197004	237054	223151	30235.5	30881.4	37790.8	38692.5	33725	32346.3	47707.7	48295.7	50598.3	49197.7	49984.6	55284.9	25865.7	18893.7	102474	109122	31651.3	27691.1
CPD0-2461	isoguanine	101215	94682.1	334848	316158	350734	141541	74393.1	76436.1	48050.9	110962	167997	164341	180245	183857	99443.1	195909	135706	125833	131535	124923	120292	121708	137813	138429	245184	232087	320552	311084	566463	566060	184759	182537	74360.1	158301	154967	147932	57389.1	34463	56089	55836.7	80844.9	84376.6	39898.8	42007.8	73265.9	65927.5	100560	102115
CPD0-2472	(<i>R</i>)-NADHX	18768.7	24048.7	21322	17681.1	10494.6	10512.1	1	1	13494.1	12929.6	36128.7	30972.5	17667.1	11634.1	17734.4	22986.4	30253.7	35478.2	23325.4	18005.4	19819.7	25222.1	18456.9	17323	30839.8	26648.6	26978.5	24985.1	45565.1	43873.4	26508.5	26178.8	29139.3	27812.9	25787	18419.3	12186.7	27446.1	1	11871.4	11200	12461.4	22207.9	22470.5	20920.7	19212.2	17297.6	16994.9
CPD0-2474	(<i>S</i>)-NADPHX	111739	113639	98331.2	93814.6	70140.7	56013.8	65805.5	58073.5	81424.1	93608.5	157617	157896	106702	95180.8	92088.2	99600.7	157728	151686	80895.2	92172.6	102971	104816	89425.1	92459.3	101217	117774	127115	125964	176419	180926	117962	112423	125720	138041	115714	108455	190139	147095	140372	132292	130538	127112	128807	113754	126695	131069	137428	139659
CPD-10051	(-)-<i>trans</i>-carveol	136888	143313	91020.5	107322	77833.5	64912.3	74177.9	59944.8	87154.5	85983.1	149501	149610	104315	101941	95065.2	101845	171449	150146	92038	104115	98706.9	108639	100075	91725.6	107703	128698	133019	121040	165041	186062	153735	153868	142778	148084	126403	115506	143813	115088	109059	102882	142766	123131	157282	134474	123486	128969	150108	129000
CPD-10157	Fe(II)-nicotianamine	465420	479808	585664	588934	369727	384232	1	1	1	406890	1	1	548695	571724	594061	602005	601691	596879	1	1	1	1	1	1	249716	250581	399850	386993	275093	275452	713551	718931	554059	544789	581645	570472	293426	291351	290881	291398	312835	308549	306873	314327	494249	504984	351334	358776
CPD-10205	4-hydroxy-5-methyl-2-methylene-3(2H)-furanone	1.58433e+06	1.47871e+06	1539820	1.43731e+06	1.36219e+06	1.10911e+06	1582196	1.47904e+06	1.42957e+06	1.72691e+06	1	1	1.41517e+06	1.1871e+06	1.0814e+06	1.32145e+06	1.71311e+06	1.32798e+06	1.60975e+06	1.99807e+06	1.64967e+06	1883672	1.55359e+06	1.87312e+06	1.34492e+06	1.09359e+06	1591562	1.75963e+06	1.27126e+06	1.43588e+06	1.52148e+06	1255800	1.27321e+06	1213081	1369624	1.3714e+06	2.17624e+06	1598858	1.56357e+06	1.32605e+06	1.43019e+06	1.65846e+06	2.05802e+06	2.3647e+06	1.9763e+06	2.13341e+06	2.04152e+06	2.24374e+06
CPD-10211	furaneol (enol form)	7173336	6.50136e+06	6.76172e+06	7.51758e+06	7.29818e+06	8696623	3.62134e+06	2.99283e+06	3554935	4.25368e+06	3.89437e+06	4.01111e+06	7.56902e+06	8266571	8850989	9139411	8.23713e+06	7422939	4.27149e+06	3.90185e+06	4185826	4.23563e+06	3.76841e+06	5.26205e+06	5.03233e+06	1	5368913	6.59052e+06	1	5418550	6775609	6.45863e+06	1	6.13497e+06	7062536	5843533	4.66083e+06	5263574	5.25517e+06	6296876	6424775	6172051	4.18923e+06	3.91641e+06	4270454	4095868	4.38216e+06	4.28426e+06
CPD-10214	mesifurane (enol form)	10457.6	100530	73301.5	64336.7	78637.3	11736.5	46412.4	41901.9	18300.3	68581.3	83035	27802.8	63413.7	63932.3	50085.7	52333.2	55503.3	50808.1	19038.4	19839.5	25412.4	28200.4	96484.2	27487.3	11167.6	16655.8	62495	62152.3	64710.9	64848.2	53648.5	11529.2	57285.3	56638.3	46680.3	50397.8	13947.7	30410.8	12958.7	12815.5	17485.3	38267.2	12147.8	89129.6	23182.4	23683.6	18967.1	19389.7
CPD-10216	furaneol glucopyranoside	1	1	1	1	1	11109.2	1	1	11206	1	1	11267.6	1	1	1	1	1	1	25654.8	19038.7	10969.3	17064.9	17332	11252.2	12433.3	10468.9	12199.3	10953.6	11987.3	16992.9	1	1	1	10699.7	1	11292.4	232844	232647	232568	233901	266283	258880	274583	279953	233891	235721	178694	179102
CPD-10254	(9Z,12Z)-hexadeca-9,12-dienoyl-CoA	44020.5	45784.5	88690.1	81748.6	58102.3	48720.1	40562.5	41962.6	62373.2	66521.4	91775.9	93673	51597.5	65212.4	18998.9	19062.3	68746.7	61327.3	104414	104380	76480.5	78158.8	76972.5	74992.7	109581	104420	106434	111554	137203	130647	61077.9	67327.9	10708.1	10452.4	93230.6	96156.1	11132.7	10874.7	99893	107391	90933.2	97592	10452.6	10708.5	89726.5	99713.9	87725.4	94311.5
CPD-10263	thalianol	1	54620.3	48835.1	50479.3	40340.2	47836.9	43398	41148.8	58515.4	55306.8	98288.8	93634.6	55058.7	56783.3	52432.6	52608.6	1	94201.2	63167.8	55951.4	58761.6	59669.7	46460.7	53100.8	1	62000.2	80373.9	79637.1	111136	108928	1	1	65935.9	66768.3	53597.8	53234.3	53200.3	61762.2	45369.4	52569.9	55185	53569.1	82234	92737.1	77099.7	71944.1	61318.3	59080.8
CPD-10269	palmitoleoyl-CoA	65616.8	62499.9	41398.5	49503.2	21657.5	20770.6	17441.1	18988.2	22890.1	37205.4	77099.7	83641.8	60482	62281.4	55648.9	59963.8	102017	92924.7	47555.5	45547.6	44659.6	53400.4	37207.3	36654.9	1	1	68657.7	70174.1	91087.2	81500.2	73258.8	53864.2	87358.5	90737.5	51575	60142.2	83627.9	80990.8	58760.5	65421.3	51298.8	49933.4	45929.1	43265.5	58409.6	51005.7	54823	63153.3
CPD-10273	(1E,2S)-2-methylbutanal oxime	163232	172058	109540	102776	76273.7	98530.6	18142.6	40223.1	144023	156866	212363	196717	101271	116141	107187	164949	211641	223550	98696.1	93554	151796	164087	1	153514	1	1	119304	181257	230341	228462	125048	110679	183359	123512	122290	104574	109909	108745	111198	124610	123969	125302	187742	123877	122434	125467	1	111967
CPD-10284	3-oxo-myristoyl-CoA	1	1	1	1	1	1	1	1	1	1	1	1	1	1	1	1	27545.2	21191.2	1	1	1	1	1	1	1	1	1	1	22026.9	1	1	1	10962	1	1	1	27938.3	10443.5	15744.3	1	1	1	1	1	1	1	1	16568.1
CPD-10296	pyropheophorbide <i>a</i>	117071	120284	226824	138029	117941	120213	27298.2	31117.2	90357.4	81975.7	62775	128200	114857	68732.1	74004.1	128101	115697	117482	92760.8	80079.9	103320	139887	106166	102292	74030.8	78167.3	231478	238897	113101	112256	120038	182452	61670.9	73388.3	97362.9	98743.7	102481	113188	99939.7	106949	125570	136386	109833	110635	180401	187025	201654	335871
CPD-10332	gibberellin<sub>44</sub> (open lactone form)	1	1	1	1	1	1	1	1	1	1	1	1	1	1	1	1	1	1	1	1	1	1	1	1	1	1	1	1	1	1	1	1	1	1	1	1	1	1	10739.8	1	1	1	1	1	11380.8	1	1	1
CPD-10507	4-(indol-3-yl)butanoate	68263.4	65600.6	10425.3	10975.4	1	1	1	1	85661.1	73759.9	89613.9	81548.3	74031.8	82357.2	97371.1	111568	91857.4	91793	105075	99767.3	96247.5	88806.1	106644	111904	1	1	10472.8	1	1	1	158516	158131	115305	122523	100575	96032.6	1	1	1	15393.6	28150.4	37458.3	23121.4	18128.4	67047.3	62513.4	141211	142772
CPD-10511	hexadecanedioate	1	101350	1	1	1	1	1	1	1	1	1	1	1	1	1	1	47180.4	43229.3	1	1	1	1	1	1	1	49988	41510.1	1	1	1	1	56969.2	1	47902.2	1	46918.2	1	1	1	20712.3	12504.9	12817.8	1	1	1	1	1	1
CPD-10512	16-oxo-palmitate	1	1	1	1	1	1	1	1	1	1	1	1	1	1	1	1	1	1	1	1	1	1	1	1	1	1	1	1	1	1	1	1	1	1	1	1	1	1	1	1	1	1	1	1	10502.9	1	191237	103712
CPD-10515	(9R,10S)-dihydroxystearate	176433	1	1	1	1	1	1	1	1	1	1	1	1	1	1	1	1	1	1	1	1	1	1	1	1	127819	1	1	1	1	1	1	1	1	1	1	1	1	1	1	1	1	1	1	1	1	1	1
CPD-10519	indole-3-acetyl-CoA	1	1	1	1	1	1	1	1	1	1	1	1	1	1	1	1	1	1	1	1	1	1	1	1	1	1	1	1	1	1	1	1	11205.6	1	1	1	1	1	1	1	1	1	1	1	1	1	36705	31624.5
CPD-1063	5-(methylsulfanyl)-ribulose 1-phosphate	17259.9	17089.3	29047.4	57604.6	27023.5	31496.2	57662.3	41478.4	54168	41086.6	77975.4	17557.8	29571.7	35722	19347.9	28086.6	31588.5	53425.4	72783.4	22913.9	81504.4	29658.4	51827.3	29248.6	87971	28129.5	29610.9	38301	23266.6	18648.6	37563.6	37539	40038.9	25317.2	27041	40119.3	55465.6	48703.4	59048.2	66832.1	81478.7	68744.5	37468.7	30990.1	51790.3	43121.5	23238.8	34948.3
CPD-10667	taraxerol	1	54620.3	48835.1	50479.3	40340.2	47836.9	43398	41148.8	58515.4	55306.8	98288.8	93634.6	55058.7	56783.3	52432.6	52608.6	1	94201.2	63167.8	55951.4	58761.6	59669.7	46460.7	53100.8	1	62000.2	80373.9	79637.1	111136	108928	1	1	65935.9	66768.3	53597.8	53234.3	53200.3	61762.2	45369.4	52569.9	55185	53569.1	82234	92737.1	77099.7	71944.1	61318.3	59080.8
CPD-10723	&alpha;-D-fructofuranose	820412	878758	1.25882e+06	1.22293e+06	310300	65275.3	47496.3	26202.3	2134499	985698	107029	907661	1.14597e+06	639575	1.17112e+06	1.20168e+06	1.01073e+06	987522	296172	249093	268654	180608	132094	186752	81539	127229	1	133984	132312	119542	407991	519398	388860	31467.5	350478	353424	1167135	1.00522e+06	1.04997e+06	961638	1099263	1.07598e+06	1.39765e+06	1.39441e+06	1.36252e+06	1.41268e+06	1.58136e+06	1.51725e+06
CPD-1086	5-amino-6-(5-phospho-D-ribitylamino)uracil	31176.2	29838.6	25378	27151.3	10800.9	1	1	1	17107.3	18177.4	1	44903.5	31056.4	23074	27093.3	28560.1	38151.4	1	27376.4	21520.3	20803.4	23404.1	19647.4	21379.4	19955	27196.5	1	1	34977.9	33466.6	35552.9	33773.9	35021.8	41256.6	22988	29574.6	1	30667.5	30099.8	30832	23207.9	29396.1	22124.1	28345.2	37559.9	1	38393.2	33784.2
CPD-1089	(-)-carvone	235538	224706	303860	308455	162617	163810	43471.2	39527.3	150928	133831	250703	245955	209033	240354	256128	248541	192105	200189	139571	137622	160596	166856	133010	129243	52024.5	48362.5	157304	156791	106207	106216	275481	267187	203925	211813	182497	194176	279925	273073	274339	273873	350849	350565	569419	550012	1.00087e+06	1.03628e+06	854256	868984
CPD-1090	(-)-isopiperitenone	235538	224706	303860	308455	162617	163810	43471.2	39527.3	150928	133831	250703	245955	209033	240354	256128	248541	192105	200189	139571	137622	160596	166856	133010	129243	52024.5	48362.5	157304	156791	106207	106216	275481	267187	203925	211813	182497	194176	279925	273073	274339	273873	350849	350565	569419	550012	1.00087e+06	1.03628e+06	854256	868984
CPD-1091	(<i>S</i>)-ureidoglycolate	1	244801	148666	276257	1	1	1	50775.9	22540.9	1	11536.8	63353.1	276775	350320	342749	397047	365303	289073	1	23129.9	6088.39	63876.1	1	215640	1	414718	110546	1	1	1	313376	307630	374990	82714	352822	1	1	11327	10668.2	16795.7	17329.9	1	16510.8	1	11261.4	10967.2	11238	17455.3
CPD-1099	raffinose	12548.2	1	12349.6	12659.3	1	1	32890.4	28601.3	27918.4	25180.8	38558.6	37465.3	1	12709.1	1	1	1	1	20219.7	20027.7	13539.1	14830.6	12413.4	19974.5	111752	122314	131837	132003	99805.2	115083	14124.6	13236.7	1	1	13348.4	11601.2	1	1	1	1	1	1	1	1	55044.1	47821.4	39862.3	38387.7
CPD-1102	1-<i>O</i>-(indol-3-ylacetyl)-&beta;-D-glucose	76597.7	27014.3	111929	47191.4	13667.3	50379.2	58949.7	65788.7	139798	137105	176209	115364	59562.5	64664.2	32242.5	31035.1	106355	58347.5	157809	136111	98692.1	163472	93287.4	91402.9	93521.5	131895	218620	135470	205532	130389	77856.4	113962	88282.3	99308.4	90206.4	98615.9	109131	93542.6	115953	131718	147096	77792.6	141782	87272.1	140005	136372	206561	214967
CPD-1107	D-<i>myo</i>-inositol 1,3,4,5,6-pentakisphosphate	1	1	1	1	1	1	1	1	1	1	1	1	1	1	1	1	1	1	1	1	1	1	1	1	1	1	1	1	1	1	1	1	1	1	1	1	34663.1	30605.4	35048.7	31200.3	30945.7	27863.2	1	11067.2	11609.1	1	1	1
CPD-11227	(indol-3-yl)acetyl-L-isoleucine	644911	200353	325423	445497	449774	430785	161802	1	130551	378136	170276	166611	265538	411051	416579	442067	412345	381992	162151	140135	182017	185922	81942.1	71237.8	367752	373756	720668	696514	645006	373175	420509	422436	616386	626044	362749	376234	491102	231795	495760	473628	499023	268415	182336	496263	859207	314595	882016	195967
CPD-11228	(indol-3-yl)acetyl-L-methionine	1	1	1	1	1	1	53877.8	56003.4	137223	114615	17799.4	17258.1	26961.3	20551.5	1	1	1	1	1	1	1	1	1	1	1	1	1	1	1	1	365130	365938	1	1	1	1	38374.3	35778.8	27889.3	28567.6	49242.7	39064.8	277848	281545	585025	580830	604547	606618
CPD-11229	(indol-3-yl)acetyl-L-tyrosine	76597.7	27014.3	111929	47191.4	13667.3	50379.2	58949.7	65788.7	139798	137105	176209	115364	59562.5	64664.2	72797.1	70404.9	53866.5	58347.5	157809	136111	98692.1	163472	93287.4	91402.9	93521.5	131895	157131	183769	205532	196551	113830	69379.8	150685	99308.4	90206.4	54800.6	109131	93542.6	63956.4	70396.6	147096	77792.6	141782	160638	140005	136372	149295	214967
CPD-11232	(-)-jasmonoyl-L-isoleucine	1	1	1	1	1	1	1	1	1	1	1	1	1	1	1	1	1	1	1	1	1	1	1	1	1	1	1	1	1	1	1	1	1	1	1	1	1	1	1	1	1	1	1	1	1	1	1	1
CPD-1125	(R)-amygdalin	317231	297688	334808	333565	330568	318770	174794	177797	268426	931060	319351	312701	291788	292922	276416	300457	295849	274550	245734	258755	282608	289672	296287	290861	286777	296384	400178	390410	180582	355905	319444	308027	303742	307521	274434	272978	389184	293377	410090	274195	250187	263912	370870	441484	531777	555930	268114	264638
CPD-11253	<i>trans</i>-tuberonic acid	26368.6	20427.3	13216.1	1	27473.5	30467.2	1	1	11283.9	12437	1	1	15301.9	28500.1	11554.5	20396.4	19440.8	19235	10999.3	1	12072.1	11619.5	1	22863.7	24041.5	20915.6	22151.3	25236.8	32147.1	23895.8	1	1	19981.5	13659.6	18121.4	1	1	1	1	1	1	1	1	1	1	1	1	1
CPD-11259	(+)-7-<i>epi</i>-jasmonoyl-L-isoleucine	1	1	1	1	1	1	1	1	1	1	1	1	1	1	1	1	1	1	1	1	1	1	1	1	1	1	1	1	1	1	1	1	1	1	1	1	1	1	1	1	1	1	1	1	1	1	1	1
CPD-11260	<i>cis</i>-tuberonic acid	26368.6	20427.3	13216.1	1	27473.5	30467.2	1	1	11283.9	12437	1	1	15301.9	28500.1	11554.5	20396.4	19440.8	19235	10999.3	1	12072.1	11619.5	1	22863.7	24041.5	20915.6	22151.3	25236.8	32147.1	23895.8	1	1	19981.5	13659.6	18121.4	1	1	1	1	1	1	1	1	1	1	1	1	1
CPD-11281	<i>S</i>-sulfanylglutathione	28538.6	22267.4	1	1	11402.6	17005.6	15887.1	10558.9	1	1	1	1	1	10882.8	1	1	1	1	1	1	16128.8	1	1	1	1	1	1	1	1	1	1	1	1	1	1	1	1	1	1	1	1	1	1	1	1	1	1	1
CPD-1142	salicin	55330.7	55977.2	36459.2	71784	46873.8	36625.3	21124.8	25810.4	47227.2	47480.1	69539.3	70925.1	35108.8	64355.9	25635.6	42524.8	47466.9	49561	42463.1	43024.5	53875.9	48793	38141.8	45239.9	44353.4	43465.5	85724.6	131964	50786.8	51938	61656.8	56296.9	50532.9	47409.7	44105.6	42074.9	68666.3	38388.9	70073.7	32999.9	87934.4	85969.2	45863.2	72429.4	85993.9	50869.6	45317.8	46428.7
CPD-11505	olivetol	531009	553378	513430	512032	362037	342770	1	1	673797	667657	807839	817614	443103	430827	509197	520392	684824	707717	890623	824604	863611	923020	685170	692415	38675.9	1	422640	390463	387492	401316	636502	634231	791959	818747	689546	697257	470476	516508	467810	460283	1	476065	583449	594136	645128	652069	661751	666513
CPD-11506	tetraketide pyrone	143675	1	1	22511.1	1	93687.1	47346.5	47413.2	60446.6	55379.7	38500.1	38428.3	95598.5	77945.9	87258.8	1	10762.8	58121.5	21434.2	1	64766.9	63107.8	15949.6	11234.6	37537.5	24577.4	18980.5	19041.8	16735.9	10927.7	34881.1	34834	76793.8	16926.1	65882.1	64817	154027	165444	155389	159776	232397	217614	228327	242275	219558	221527	202203	206809
CPD-11507	triketide pyrone	83013.1	61322.2	21904.1	33651	1	1	1	1	1	1	1	1	1	1	1	1	1	1	1	1	1	1	1	1	1	1	1	1	1	1	1	1	1	1	1	1	1	1	1	1	1	1	1	1	1	1	1	1
CPD-11517	3-oxo-2-(cis-2'-pentenyl)-cyclopentane-1-octanoyl-CoA	1	1	1	1	1	1	1	1	1	1	24228.5	31242.1	1	22866.4	1	1	1	1	1	1	1	1	1	1	25302.9	23001.7	10740.4	1	1	10896.8	26654.4	26237.9	1	1	1	1	1	1	1	1	1	1	1	1	1	1	1	1
CPD-11518	3-oxo-2-(cis-2'-pentenyl)-cyclopentane-1-(E-octa-2-enoyl)-CoA	1	1	1	1	1	1	15725.8	1	1	1	106834	92601.2	56640.6	43649.6	104376	94983	1	1	137884	143412	1	1	1	1	254469	263028	1	1	1	1	74834.2	51077	1	1	1	1	1	1	1	1	1	1	1	1	1	1	1	1
CPD-11519	3-oxo-2-(cis-2'-pentenyl)-cyclopentane-1-(3R-hydroxyoctanoyl)-CoA	557985	521964	394430	387154	375718	361219	778662	755226	368876	397531	779203	674923	671830	643072	878922	838179	380953	416574	962195	1133508	445837	477046	354951	329588	1.92368e+06	2232737	206806	198173	572776	601183	645652	588401	500914	410883	290182	275644	526952	528757	439134	436537	165619	180378	426931	468428	230370	242431	135001	171591
CPD-11520	3-oxo-2-(cis-2'-pentenyl)-cyclopentane-1-(3-oxooctanoyl)-CoA	711724	712407	499031	494472	472609	462507	1.00316e+06	960727	472141	520331	1.01542e+06	879415	859944	806912	1.11485e+06	1.06357e+06	491616	521240	1.25257e+06	1.48752e+06	580241	617225	455026	436569	2445323	2831374	269683	259397	723093	758156	816542	781141	627424	647349	367068	345151	665456	689471	555093	560974	209282	231439	591481	594700	291549	313683	176620	221353
CPD-11525	3-oxo-2-(cis-2'-pentenyl)-cyclopentane-1-butanoyl-CoA	98476.1	95256.6	62339.6	73906.6	61200.4	56591.2	1	1	1	1	1	1	112007	117746	139277	137202	81276.8	84609.1	1	1	1	1	1	1	336952	349095	33815.9	38253	106287	105157	129569	120707	94903.5	90989.6	41297.2	52768.3	112305	109405	90541.2	94657.3	23831.4	29383.3	106745	93469.5	32729.4	39218	18696.6	28225.1
CPD-11591	16-feruloyloxypalmitate	71219.6	71171.4	81831.5	82705.9	34005.8	33819.8	1	1	1	1	1	1	42978.9	45804.8	48264.8	41160.7	1	1	1	1	1	1	1	1	1	17775.3	11638.6	17679.1	47191.1	47052.2	31914.7	30571.4	1	1	1	1	1	1	1	1	13326.7	12580.8	1	1	1	1	1	1
CPD-11641	4-methylumbelliferyl glucoside	39067.3	36729.6	62272.8	58884.2	23299.7	10779.8	1	1	33535.3	27378.5	63461.1	75203.2	44972.4	46611.8	42491	44907.1	52476.4	38568.2	33725.1	26360.2	37995.5	36680.8	27052	30774.5	1	1	75959.6	74638.8	40405.1	43932.5	59147	60344.8	47402.3	46523.9	32600	34516.7	15926.1	11563.1	17999.7	18203.1	42178.4	41995.1	22810.3	39163.1	148358	139599	223638	257061
CPD-11668	dihydroxyferuloyl-sinapoyl spermidine	77095	76779.4	18615.8	26079.9	1	1	55744.6	57461.6	1	1	195623	194572	105490	110758	43824.5	44529.1	111338	104272	133587	150282	1	1	1	1	155078	170345	37817.6	33915.1	1	1	122428	111950	10857.7	1	1	1	98964.2	80440.3	46122.5	41925.9	1	1	99797.2	105593	25114	20816.4	12695.6	13326.8
CPD-11712	2-methyl-6-geranylgeranyl-1,4-benzoquinol	491970	499314	464324	470224	304823	334525	299874	288530	478178	471852	611771	587995	457298	462373	459419	1	531054	504777	432669	467023	475382	506215	447082	460815	484083	505539	632669	651812	588659	1	556987	551470	505114	1	488832	473033	349716	358835	353272	345317	358782	315612	1	352568	428484	394384	442700	429820
CPD-11763	bisorganyltrisulfane	16483.3	11087	48563.4	49972.8	32509.7	29118.6	1	1	1	1	1	45298.4	1	32099	11147.1	1	37843	40183.2	1	1	16826.5	11590	1	1	114176	15657.8	23302.3	18480.2	61541.8	54733	59304.4	17105.1	29880.1	39833.5	16522.1	23082.8	37918.1	36357.6	39032.2	31079.3	10477.9	30857.6	28508.9	23876.4	28640.7	30295.6	16486.5	30063.1
CPD-11770	7,8-dihydromonapterin	869760	631713	758012	732640	815579	851834	168507	161917	454980	466568	417839	422162	692839	730692	803594	861032	675118	681117	542471	537924	440947	710008	568833	702588	344472	1	433837	1	530245	428470	522061	517059	655976	631936	598805	316291	269321	346479	1	290393	271972	283120	168375	180359	156739	108712	93584.2	100158
CPD-11827	(<i>22R,23R</i>)-28-homocastasterone	319516	307857	248882	267659	216411	224371	247078	248821	277971	261435	446904	461570	280638	285768	265184	287062	416830	412212	316746	299345	310710	305085	240243	247383	367870	367161	367642	366193	470003	473915	311368	316360	1	360389	299339	287446	278383	284197	230096	243464	229602	235342	377649	389875	343288	321196	297860	279335
CPD-11835	24-epibrassinolide	1	1	1	1	43351.5	39701.9	30313.4	33453.7	55890.4	51598.1	91634.8	1	1	1	51220	50922.8	1	1	50037.8	49832.2	61914.9	62582.8	49718.5	47862.5	60721.9	56132.2	1	1	1	93592.2	1	1	69669.2	1	1	54918.4	42525.7	47145.7	38325.9	46010	48259.2	47932	55270.7	1	68824.7	62753.4	60687.2	59503.3
CPD-11937	1D-<i>myo</i>-inositol 3-diphosphate 1,2,4,5,6-pentakisphosphate	29092.2	22996.6	39466.2	36707.9	29509.8	1	1	1	1	11143.6	1	1	22457.8	26144.5	42793	33808.7	10656.4	10543.3	1	11066.1	1	1	11323.9	23573.2	1	1	1	1	1	1	1	22116.3	26743.9	42847.4	35084.8	27739.6	50394.7	37253	58127.7	49131	44816.4	60677.6	1	1	1	1	35056.2	65678.9
CPD-11938	1D-<i>myo</i>-inositol 1,5-bis(diphosphate) 2,3,4,6-tetrakisphosphate	77192.3	79261.4	38722.4	71207.3	23909.9	22414.3	37997.1	48120.9	21511.8	31885.4	113672	115372	50430.9	37323	74160.5	48670.3	107872	107709	81970.3	78676.2	10547	84616	21959.3	33877.2	80750.5	79448.2	93081	94146.1	121517	42552.6	41895.6	84809.7	10673.7	96833.4	79707.8	80106.6	68300.6	77258	54403.5	53282.7	10030.1	59512.6	84811.8	87473.1	96697.4	76573.7	81769.5	77074
CPD-11939	3,5-bisdiphosphoinositol-1D-<i>myo</i>-inositol 2,3,4,6-tetrakisphosphate	77192.3	79261.4	38722.4	71207.3	23909.9	22414.3	37997.1	48120.9	21511.8	31885.4	113672	115372	50430.9	37323	74160.5	48670.3	107872	107709	81970.3	78676.2	10547	84616	21959.3	33877.2	80750.5	79448.2	93081	94146.1	121517	42552.6	41895.6	84809.7	10673.7	96833.4	79707.8	80106.6	68300.6	77258	54403.5	53282.7	10030.1	59512.6	84811.8	87473.1	96697.4	76573.7	81769.5	77074
CPD-12177	(<i>R</i>)-methylmalonate-semialdehyde	1	1	1	1	97324.2	239865	1	74321.7	1	1	1	1	1	1	1	94915.5	38209.7	22181.6	1	38126.3	1	32837.3	1	130872	25201.5	280626	1	1	139422	80129	1	1	51717.6	1	1	155757	1	9858.41	48409.6	1	34262.4	11097.3	22565.5	31028.5	4191.51	1	1	36470.8
CPD-12212	tricoumaroyl spermidine	1	1	1	1	1	1	1	1	1	1	1	1	1	1	1	1	1	1	1	1	1	1	1	1	1	1	1	1	1	1	1	1	1	1	1	1	1	1	1	1	1	1	1	1	26816.1	26467.8	19350.6	18290
CPD-12213	tricaffeoyl spermidine	34134.3	33792.6	22918.8	28974.5	11678.9	1	1	1	1	1	1	1	11313	22349.2	10530.8	21623.6	1	1	1	1	1	1	1	1	1	1	1	1	1	1	30973	33382	1	1	1	1	1	1	1	1	1	1	1	1	1	1	1	1
CPD-12214	triferuloyl spermidine	1	1	1	1	1	1	1	1	1	1	1	1	1	1	1	1	1	1	1	1	1	1	1	1	1	1	31513.5	28050.9	10823.1	1	1	1	1	1	1	1	1	1	1	1	10359.7	10538.7	1	1	17086.3	16238.6	38224.3	40323.8
CPD-12282	12-hydroxylaurate	56888.4	53053.5	113399	124029	11031.9	11534.8	1	1	88504.8	97265.6	118348	150914	78959.9	94952.1	148805	140526	139618	139218	112390	73407.8	198635	209804	15765.5	11336.6	290750	214748	50549.1	56493.8	346894	322773	130241	118361	290922	270723	239464	229705	241321	286564	94932.6	115173	12164.2	1	158008	122535	60540	96828.4	170727	174805
CPD-12299	11-hydroxydodecanoate	56888.4	53053.5	113399	124029	11031.9	11534.8	1	1	88504.8	97265.6	118348	150914	78959.9	94952.1	148805	140526	139618	139218	112390	73407.8	198635	209804	15765.5	11336.6	290750	214748	50549.1	56493.8	346894	322773	130241	118361	290922	270723	239464	229705	241321	286564	94932.6	115173	12164.2	1	158008	122535	60540	96828.4	170727	174805
CPD-12321	15-<i>cis</i>-phytoene	30202.6	1	1	1	1	1	18223.9	19160	1	19771.6	21206.7	1	12591.1	20166.6	19585.8	19624.7	45896.1	1	1	1	20814.2	21351.7	13917.4	12999.4	1	23544.8	1	1	1	1	28233.1	21047	1	1	20568.8	1	1	1	1	1	20925.3	19295.7	1	1	1	1	17101	18375.1
CPD-12366	8-oxo-GTP	70201.6	59972.8	17797.4	17831.6	2.7342e+06	2893990	2419809	11670.7	18700.8	17021.5	33758.7	34721.6	18516.5	27132.2	10810.3	11256.9	18562.9	24868.4	65744.7	63326	3.80152e+06	3.90615e+06	3.14977e+06	3.21583e+06	51066.1	73003.7	3.91245e+06	3.79149e+06	5.34892e+06	5438425	64140.6	64566.2	32135.5	11032.2	3546750	3604653	33802.1	47410.8	2575452	2.72445e+06	2.63207e+06	2668092	18604.9	16730.2	3809888	3.57683e+06	3.33821e+06	3.35013e+06
CPD-12384	(<i>Z</i>)-1-(glutathion-<i>S</i>-yl)-<i>N</i>-hydroxy-2-phenylethan-1-imine	1	1	1	1	1	1	1	1	1	1	1	1	1	1	1	1	1	1	1	1	1	1	1	1	1	1	1	1	1	1	1	1	1	1	1	1	1	1	1	1	1	1	1	1	1	1	16631.7	17960.6
CPD-12397	(<i>E</i>)-1-(L-cysteinylglycin-<i>S</i>-yl)-<i>N</i>-hydroxy-&omega;-(methylsulfanyl)hexan-1-imine	76597.7	27014.3	111929	47191.4	13667.3	50379.2	58949.7	65788.7	139798	137105	176209	115364	59562.5	64664.2	32242.5	31035.1	106355	58347.5	157809	136111	98692.1	163472	93287.4	91402.9	93521.5	131895	218620	135470	205532	130389	77856.4	113962	88282.3	99308.4	90206.4	98615.9	109131	93542.6	115953	131718	147096	77792.6	141782	87272.1	140005	136372	206561	214967
CPD-12399	(<i>E</i>)-1-(glutathion-<i>S</i>-yl)-<i>N</i>-hydroxy-&omega;-(methylsulfanyl)heptan-1-imine	1	1	1	1	1	1	1	1	1	1	1	1	1	1	1	1	1	1	1	1	1	1	1	1	1	1	1	1	1	1	1	1	1	1	1	1	280283	285460	265359	265801	322965	296967	845926	858260	1.22041e+06	1.19546e+06	379294	389880
CPD-12480	1,3,7-trimethylurate	169384	165199	127152	137155	111145	115229	100871	90845.8	128783	114674	125789	125548	128753	128198	125646	119225	106115	112587	117252	121952	160097	167684	106064	121361	120751	110765	153267	186565	160078	157574	111696	102177	127332	119892	104208	97305	345755	353631	343173	332246	302328	301011	347689	328520	215694	220131	215764	215782
CPD-12487	petivericin	22502	24038.4	19047.8	13370.9	17142.4	12529.3	1	1	1	1	33239.7	33096.7	12230.8	1	18182.6	23594.3	1	11616.5	12274.3	13438.2	11526.5	13064.6	10288.4	1	1	1	13219.5	18351.5	12357.4	1	27139.4	16205.7	11423.3	10644.9	1	1	21692.2	21596.2	19019.5	20546.2	43982.7	35566.6	47412.9	50050.5	54192.6	38753.4	27783	31127.2
CPD-12491	phenylmethanesulfenate	1	1	1	1	1	1	17944.1	10881.9	11068.9	10220.3	1	1	1	1	1	1	1	1	1	1	11019.7	1	10709.7	1	15421.2	11118.4	1	1	1	1	1	1	1	1	1	1	1	1	1	1	1	1	1	1	1	1	1	1
CPD-12493	3-epi-6-deoxocathasterone	54056.7	52254	42639.3	48505	32840.3	40734.9	32581.3	30075.8	43176.2	45959.2	1.71159e+06	1.73146e+06	54053.6	51807.2	52948.8	51604.4	2.35919e+06	2.2449e+06	55250.5	46864	50018.8	54199.1	46668.9	38016.4	4.57705e+06	56741.5	2.01863e+06	2051769	75673.1	6215150	60740.9	4278147	68966.7	1.65859e+06	57844.5	52131	3.85082e+06	4303024	37883.5	34855.8	37477.2	41304.6	52263.7	60582.2	1.89554e+06	53307.5	41350.7	3.86853e+06
CPD-12495	(22R,23R)-22,23-dihydroxycampesterol	1	1	1	1	1	1	32105.4	33458.4	1	1	1	1	1	1	1	1	1	1	1	1	11196.1	1	1	1	1	1	1	1	100164	108103	1	1	1	1	1	1	1	74866.3	1	66182.4	1	58149.3	62798.3	54702.9	61782.9	1	1	1
CPD-12496	(22R,23R)-22,23-dihydroxy-campest-4-en-3-one	1	122495	500511	122141	246631	217609	1	1	103680	198533	607209	578824	125408	301536	109778	118411	177362	188426	136103	142603	1	120224	1	98438.3	126808	150901	191179	185122	220802	440633	400481	134263	186361	155488	136155	149291	153692	141818	139500	130414	132472	125189	144472	141786	152576	136975	138204	156236
CPD-12497	7-oxatyphasterol	1	1	48835.1	50479.3	40340.2	47836.9	43398	41148.8	58515.4	55306.8	98288.8	93634.6	55058.7	56783.3	52432.6	52608.6	93881.9	94201.2	63167.8	55951.4	58761.6	59669.7	46460.7	53100.8	1	1	1	1	111136	1	1	1	10929.5	66768.3	53597.8	53234.3	1	1	1	52569.9	55185	53569.1	82234	92737.1	77099.7	71944.1	1	59080.8
CPD-12498	7-oxateasterone	1	1	48835.1	50479.3	40340.2	47836.9	43398	41148.8	58515.4	55306.8	98288.8	93634.6	55058.7	56783.3	52432.6	52608.6	93881.9	94201.2	63167.8	55951.4	58761.6	59669.7	46460.7	53100.8	1	1	1	1	111136	1	1	1	10929.5	66768.3	53597.8	53234.3	1	1	1	52569.9	55185	53569.1	82234	92737.1	77099.7	71944.1	1	59080.8
CPD-12500	26-hydroxycastasterone	1	1	1	1	43351.5	39701.9	30313.4	33453.7	55890.4	51598.1	91634.8	1	1	1	51220	50922.8	1	1	50037.8	49832.2	61914.9	62582.8	49718.5	47862.5	60721.9	56132.2	1	1	1	93592.2	1	1	69669.2	1	1	54918.4	42525.7	47145.7	38325.9	46010	48259.2	47932	55270.7	1	68824.7	62753.4	60687.2	59503.3
CPD-12501	26-hydroxybrassinolide	301717	320825	342132	366804	192000	196742	1	1	1	1	207121	206648	263782	251883	179398	189557	216921	230697	1	1	139865	145454	115566	1	1	1	253862	261627	240654	238494	322293	306268	153154	170871	163085	1	1	1	1	1	1	1	191633	183183	481139	496695	416444	400616
CPD-12511	UDP-&beta;-L-arabinofuranose	1	1	1	1	1	1	1	1	1	1	1	11370.8	1	1	1	1	1	1	1	1	1	1	1	1	1	12026.8	11147.3	10765.5	1	1	1	12613.4	11274.6	1	1	1	22979.7	17577.5	17733.8	13059.2	11660	1	17891.5	1	11005.6	11182.3	1	12326.2
CPD-12513	UDP-&beta;-L-arabinopyranose	1	1	1	1	1	1	1	1	1	1	1	11370.8	1	1	1	1	1	1	1	1	1	1	1	1	1	12026.8	11147.3	10765.5	1	1	1	12613.4	11274.6	1	1	1	22979.7	17577.5	17733.8	13059.2	11660	1	17891.5	1	11005.6	11182.3	1	12326.2
CPD-12568	(3<i>S</i>,6<i>E</i>)-nerolidol	1	1	1	1	1	1	1	1	53295.4	51971.8	131419	86958.6	1	1	1	1	1	1	716614	669587	538146	620648	528676	549046	1	1	30848.8	30776.6	1	1	538183	547120	566314	568556	504916	489803	1	1	1	1	1	1	1	1	1	1	1	1
CPD-12575	UDP-&alpha;-D-glucose	330286	346868	312127	311945	268589	285650	247526	255435	320626	296385	444505	434625	314382	314362	340783	343152	430144	423031	310408	306536	356887	360457	320935	304967	406788	403527	368243	359421	549939	557632	380569	385328	392929	397635	338167	331124	358102	404464	282462	296040	294659	289946	370532	382592	370132	340321	313950	316762
CPD-12581	<i>S</i>-(2<i>E</i>,6<i>E</i>)-farnesyl-L-cysteine	1	1	10849.3	10891	1	1	1	1	1	1	1	1	1	11553.6	1	1	11418	11113.8	1	1	1	1	1	1	1	1	1	1	1	1	19794.2	20969.7	11802.5	11847.6	1	1	12698.6	12538.3	1	16868	22644.9	16304.1	1	1	1	40416.1	45906.4	1
CPD-12587	(2<i>E</i>,6<i>E</i>)-farnesyl phosphate	1	1	1	1	1	1	1	1	1	1	1	1	1	1	1	1	1	1	1	1	1	1	12894.6	18484.2	1	1	1	11506.4	1	1	1	1	1	1	1	1	1	1	1	1	1	1	1	22472.6	73470	69782.7	115165	106388
CPD-12594	all-<i>trans</i>-geranyl-geranyl monophosphate	1	1	1	1	1	1	1	1	1	1	23162.9	18194.8	10440.4	17909.4	1	1	1	11522.7	10525.4	1	1	1	1	1	1	1	11749.6	30526.3	1	1	23256.1	11529.6	1	11009.7	1	1	1	1	1	1	1	1	1	1	1	1	1	1
CPD-12601	&beta;-D-mannopyranose	820412	878758	1.25882e+06	1.22293e+06	310300	65275.3	47496.3	26202.3	2134499	985698	107029	907661	1.14597e+06	639575	1.17112e+06	1.20168e+06	1.01073e+06	987522	296172	249093	268654	180608	132094	186752	81539	127229	1	133984	132312	119542	407991	519398	388860	31467.5	350478	353424	1167135	1.00522e+06	1.04997e+06	961638	1099263	1.07598e+06	1.39765e+06	1.39441e+06	1.36252e+06	1.41268e+06	1.58136e+06	1.51725e+06
CPD-12629	salicylate &beta;-D-glucose ester	28538.6	60098.9	68375.9	69310.8	11402.6	64952.3	35274.7	54024.6	54892.7	51227.7	80678.6	81233	63399.8	10882.8	69191.1	68385.2	53413.5	52074.1	62338.2	66281.9	83062.8	75517.9	55586.1	65283.6	51834.9	54751.2	84598.4	76640.4	60321.4	63153.1	56447.8	51632	60203.1	69455.1	44120.4	46487.9	161672	160013	131458	128228	86161.8	87401.7	137285	129971	98074.1	106754	83285.8	90329.1
CPD-12630	benzoyl-&beta;-D-glucopyranose	112548	115013	159006	157926	92123.9	95785.8	63079.9	48934.3	133234	131450	167246	164448	161672	160446	172233	171477	150650	147861	152156	138721	120636	124978	116023	111396	113761	107748	162876	174668	1	120035	194115	178970	164029	165962	126393	127778	107903	104718	114468	110065	120078	119039	63341.6	66384.8	68951.6	67711.4	48075.4	52046.1
CPD-12635	(L-cysteinylglycin-<i>S</i>-yl)(1<i>H</i>-indol-3-yl)acetonitrile	6461934	4.15817e+06	3502617	6.92465e+06	4.25239e+06	4.65298e+06	5.01222e+06	6.56689e+06	4063158	6383584	4354296	7026863	4257510	4430541	3.95907e+06	4708906	2421068	4.01782e+06	3.23425e+06	3.59463e+06	5389209	3.60218e+06	3.60632e+06	4.48734e+06	5155713	3.74314e+06	3.40888e+06	7684360	3443927	4.30987e+06	5034680	6420759	4.39777e+06	4.32995e+06	4.17286e+06	6593402	8757885	8772026	8673405	9576448	8840694	8567846	9197036	8922677	8802103	8963167	8953325	9225669
CPD-12644	1-palmitoyl-2-vernoloyl-phosphatidylcholine	1	1	940824	985527	1	1	1	1	1	1	1	1.33335e+06	1	1	1	1	1	1	1	1	1	1	1	1	1	1	681451	728443	1	1	1	1	1	857126	1	1	689871	636739	969924	569621	1.38029e+06	1.26162e+06	1	1	1.16388e+06	1.17223e+06	960839	1.53489e+06
CPD-12655	1-(4-hydroxyphenyl)-3-(2,4,6-trihydroxyphenyl)propane-1,3-dione	1	1	1	1	1	1	1	1	1	1	1	1	1	1	1	1	1	1	1	1	1	1	1	1	1	1	1	1	1	1	1	1	1	1	1	1	1	1	1	1	1	1	1	1	11332.9	11145.1	18567.1	17037.5
CPD-12702	(<i>R</i>)-mandelonitrile	222877	12047.2	169453	155187	279095	177833	152430	238460	210169	205796	157466	112226	169627	170347	146146	146840	155263	142013	218229	203445	196030	184622	162976	185173	292033	169782	200002	197004	237054	223151	113799	104197	157630	164555	173130	161691	47707.7	48295.7	50598.3	49197.7	49984.6	55284.9	25865.7	18893.7	102474	109122	31651.3	27691.1
CPD-12724	baicalein	1	1	1	1	1	1	1	1	1	1	1	1	1	1	1	1	1	1	1	1	1	1	1	1	1	1	1	1	1	1	1	1	1	1	1	1	1	1	1	1	1	1	1	1	1	1	1	1
CPD-12745	(13<i>E</i>)-8&alpha;-hydroxylabd-13-en-15-yl diphosphate	583405	602692	783189	803347	411020	392216	200251	202972	610797	581130	1.02806e+06	1.0346e+06	775630	708263	658375	658489	818043	837058	631056	688043	794998	766828	651749	639978	376239	400706	849446	864636	578744	598886	868693	884611	716829	706026	637962	646752	465363	412518	546717	537187	675316	643409	477598	458179	481379	463959	753038	736286
CPD-12815	CDP-1,2-dipalmitoylglycerol	12383.2	24379.8	1	1	35850.4	1	1	1	19931.6	12957.7	1	25919.5	1	1	1	1	1	1	18822.1	19742	1	1	1	1	1	1	1.92357e+06	1.92771e+06	1.96685e+06	1.99005e+06	1	1	20106.2	19839.9	18355.4	1	1.8444e+06	1.7818e+06	1.84823e+06	1.86083e+06	1.41863e+06	1446170	2.02459e+06	1.97503e+06	1.81556e+06	1.80476e+06	1.18071e+06	1.15469e+06
CPD-12829	plastoquinol-9	7638032	3648010	6403736	3.21426e+06	163136	139750	5895682	5.92926e+06	6.59248e+06	6866649	10393636	9997626	7.23623e+06	7.07808e+06	3.44746e+06	6.7752e+06	5.00902e+06	4871661	7286011	7565556	7486178	7.52361e+06	6576510	6.53504e+06	3.63803e+06	3.8557e+06	4.29516e+06	4.19931e+06	11661845	5117105	3.88835e+06	3895072	4283434	4.27154e+06	3.73232e+06	3.60571e+06	9744658	9090247	3.80061e+06	3794060	3631325	7364842	4.21899e+06	9181022	4.18249e+06	8818717	4243426	8.16898e+06
CPD-12830	demethylphylloquinol	147309	152344	128898	121284	118579	133833	130408	135241	122458	130852	160348	156549	176852	195418	173252	176973	304645	175572	208650	195026	151944	167771	165516	90187.4	226845	116945	250460	188849	310756	305525	159256	221640	170934	166600	136682	131468	225298	161169	133724	137221	138613	155887	111507	120293	108824	173354	205253	202104
CPD-12831	phylloquinol	792644	788395	684373	690297	531092	578664	460121	471158	774706	691042	1213582	1.23528e+06	745880	795104	798387	789175	1.15213e+06	1.14385e+06	837369	763004	890404	890143	637807	653306	895702	812823	1.01888e+06	1.01641e+06	1.2131e+06	1.24095e+06	867057	872172	998144	984351	818527	823153	591572	790871	560304	607379	607908	594499	842388	897584	945360	879360	829329	819681
CPD-12850	4&alpha;,14&alpha;-dimethyl-9&beta;,19-cyclo-5&alpha;-cholest-24-en-3&beta;-ol	5837547	5923613	4994600	5.42111e+06	4433088	4.10876e+06	3750235	3.75575e+06	1970657	2.05403e+06	2.33582e+06	2.21382e+06	5.27964e+06	5076726	5.85629e+06	5898983	3165486	3.04263e+06	2336034	2477227	2.00789e+06	1.96273e+06	2.04733e+06	2.24662e+06	4681766	5009381	2710405	2.82888e+06	6.67711e+06	6.8179e+06	5245811	5.2064e+06	2.25408e+06	2.27716e+06	2402701	2.40152e+06	6.74687e+06	5803498	5805875	5.45444e+06	6732033	7.04691e+06	5240545	5.05397e+06	2.51677e+06	2.62267e+06	5.68447e+06	6.22021e+06
CPD-12852	4&alpha;,14&alpha;-dimethyl-5&alpha;-cholesta-8,24-dien-3&beta;-ol	5837547	5923613	4994600	5.42111e+06	4433088	4.10876e+06	3750235	3.75575e+06	1970657	2.05403e+06	2.33582e+06	2.21382e+06	5.27964e+06	5076726	5.85629e+06	5898983	3165486	3.04263e+06	2336034	2477227	2.00789e+06	1.96273e+06	2.04733e+06	2.24662e+06	4681766	5009381	2710405	2.82888e+06	6.67711e+06	6.8179e+06	5245811	5.2064e+06	2.25408e+06	2.27716e+06	2402701	2.40152e+06	6.74687e+06	5803498	5805875	5.45444e+06	6732033	7.04691e+06	5240545	5.05397e+06	2.51677e+06	2.62267e+06	5.68447e+06	6.22021e+06
CPD-12853	4&alpha;-methyl-5&alpha;-cholesta-8,14,24-trien-3&beta;-ol	142688	132589	120238	129986	100175	108322	88495.9	102193	140553	139040	219316	221239	138842	138683	131448	140288	202749	194404	157849	145496	174775	163580	139168	133283	159768	154113	178307	192851	234747	226679	156691	152079	182400	179123	152968	156725	115778	133639	116101	122850	127971	124902	170425	182607	184268	173395	152802	150519
CPD-12860	4&alpha;-methyl-5&alpha;-cholesta-7,24-dien-3&beta;-ol	59769	59306.8	56152.3	60957.4	46955	49279.4	40943.6	41079.7	61542.2	60085.1	97492.9	102086	60005.9	54615.8	67125.4	62975.9	93972.8	88776	63181.5	60807.2	70026.2	74625.2	55870.1	58419.4	70986.3	70134.4	86880.8	86201.3	101937	105550	60621.5	56695.8	75516.1	76338.5	67319.5	63949.6	62474.3	61284.6	86883.1	92646.1	83350.2	77474	146376	147096	181554	180619	117161	119177
CPD-12865	4&alpha;-hydroxymethyl,4&beta;,14&alpha;-dimethyl-9&beta;,19-cyclo-5&alpha;-ergost-24(24<sup>1</sup>)-en-3&beta;-ol	111816	116445	99932.3	97751.8	77117.9	62751.9	62691.7	60533.5	68262.5	76027.1	133800	131968	106568	102390	107602	93672.1	128368	117420	73621.4	80827.3	77651.3	73975.9	73454	74201.3	95661.7	111341	110040	113317	165711	158123	115228	114235	101120	107389	91044	88882.1	116201	106450	106141	101303	118845	123187	103233	101468	91591.7	88948.3	113204	121213
CPD-12867	4&alpha;-carboxy-4&beta;,14&alpha;-dimethyl-9&beta;,19-cyclo-5&alpha;-ergost-24(24<sup>1</sup>)-en-3&beta;-ol	341626	338081	192186	295353	269879	128437	378452	371975	344454	192014	350647	531336	338644	294945	272407	274550	434399	311959	313206	225457	363408	216059	318653	171914	449648	470309	291582	395091	315242	308503	245010	234023	375280	283765	334444	323450	313627	352378	264816	259381	257514	259752	456440	456289	422672	278541	300607	307748
CPD-12868	cycloeucalenone	150883	550849	1	1	395867	414969	374256	348593	314987	1	1	1	384283	535980	403991	397590	1	1	415422	251820	1	641987	125521	344314	601740	438090	1	1	230615	796035	1	415189	192856	186543	1	1	353475	544507	114544	334014	331158	124518	566340	273698	181655	432977	512586	168172
CPD-12907	4&alpha;-hydroxymethyl-ergosta-7,24(24<sup>1</sup>)-dien-3&beta;-ol	3.79872e+06	3.72191e+06	5084182	4865954	3.24489e+06	3.15061e+06	1.37386e+06	1.32347e+06	3.43322e+06	3.52055e+06	4565075	4587142	4.23243e+06	4.03843e+06	4.17792e+06	4074365	3.88659e+06	3.75404e+06	3.1207e+06	3.38595e+06	3.22889e+06	3.37948e+06	3532080	3.73405e+06	2.53832e+06	2752700	4.6505e+06	4.6871e+06	3146451	3.54935e+06	4648461	4.34787e+06	3.89195e+06	3.7468e+06	3.56383e+06	3.64662e+06	4.25198e+06	4027256	4618453	4.21622e+06	5.53477e+06	5250396	3.529e+06	3.54408e+06	5.11732e+06	5.3087e+06	5.91056e+06	6165165
CPD-12908	4&alpha;-formyl-ergosta-7,24(24<sup>1</sup>)-dien-3&beta;-ol	1	59919.9	50965.5	1	41535.7	47145.2	49916.2	49988.8	56979.4	56732.1	1	1	1	1	1	1	1	1	60296.3	45632.8	56017.3	59375.6	46235.5	48267.7	1	1	1	1	1	101245	62391.2	51275.2	1	1	1	57709	43737	1	37236.8	45401.5	1	1	61609.9	68151.6	1	1	1	1
CPD-12909	4&alpha;-carboxy-ergosta-7,24(24<sup>1</sup>)-dien-3&beta;-ol	1.33552e+06	1.32224e+06	1.17458e+06	1.20905e+06	933438	840871	770910	772856	1.05501e+06	1.11455e+06	1.91756e+06	1.85891e+06	1.31276e+06	1.22312e+06	1.21926e+06	1.27186e+06	1.80449e+06	1.82553e+06	1.16228e+06	1.27742e+06	1.26516e+06	1.30838e+06	1.07041e+06	1.06187e+06	1.23753e+06	1334057	1.59849e+06	1.61158e+06	1.98403e+06	1915434	1403867	1371787	1.5871e+06	1.59129e+06	1.36099e+06	1.32604e+06	1.64633e+06	1418166	1.49509e+06	1.46645e+06	1.43734e+06	1.44273e+06	1.57383e+06	1.51581e+06	1.58432e+06	1.60812e+06	1.6638e+06	1.61579e+06
CPD-12910	episterone	142688	132589	120238	129986	100175	108322	88495.9	102193	140553	139040	219316	221239	138842	138683	131448	140288	202749	194404	157849	145496	174775	163580	139168	133283	159768	154113	178307	192851	234747	226679	156691	152079	182400	179123	152968	156725	115778	133639	116101	122850	127971	124902	170425	182607	184268	173395	152802	150519
CPD-12911	4&alpha;-hydroxymethyl-stigmasta-7,24(24<sup>1</sup>)-dien-3&beta;-ol	52561.8	52264.3	47440.9	47993.4	43351.5	39701.9	30313.4	33453.7	55890.4	51598.1	91634.8	85228.1	47515.6	49437.3	51220	50922.8	75680.9	77810.1	50037.8	49832.2	61914.9	62582.8	49718.5	47862.5	60721.9	56132.2	70142.8	72939.3	97559.1	93592.2	54644.8	58967	69669.2	68472.5	63442.5	54918.4	42525.7	47145.7	38325.9	46010	48259.2	47932	55270.7	57930.7	68824.7	62753.4	60687.2	59503.3
CPD-12912	4&alpha;-formyl-stigmasta-7,24(24<sup>1</sup>)-dien-3&beta;-ol	42911.2	42600.5	38439.1	31365.1	28945.2	23728.4	19338	25950.7	34257.3	31080.8	64661.7	1	36423.4	35720.3	37385.9	40183.2	54887.4	55068.1	38588.7	38598.4	47177.5	44558.8	31568.6	26881.4	43107.3	38081.4	52247	51210	1	1	44219.7	44140.6	52260.6	49093.3	38440.2	38678.3	22311.6	34337.8	21955.8	23886.4	29827.6	25294.5	37479.5	47744.7	49459.1	43661.8	45191.4	36913.4
CPD-12914	4&alpha;-carboxy-stigmasta-7,24(24<sup>1</sup>)-dien-3&beta;-ol	13305059	13253397	11407309	11648771	9158257	8550569	7660979	7.9137e+06	10139342	10694174	16847532	16313521	12786426	11806642	11978053	12134887	16111192	16092937	11320679	12532653	12010087	12023634	10579291	10307648	11987986	13248945	14844457	14873165	16402924	16339866	13881829	13856681	14205187	14575644	12840814	12335752	16430594	14485590	14698961	14471452	14196542	14161371	14766343	14305491	14929308	15094090	15329547	15363659
CPD-12915	avenastenone	126741	118218	187539	198081	282171	284959	18310.4	18674	28361.5	24556.2	94571.5	83772.7	43001.1	1	25891.5	55857.9	211381	207267	62600.3	49687.7	17956.1	16977.3	82662.6	33557	25958.1	25221	147799	1	1	1	146073	145414	43479.1	122565	94413	35805.2	11492.9	16761.1	74142.2	18681.1	68776.9	69335.5	49833.8	56472.6	189908	64573.5	198675	167367
CPD-12916	4&alpha;-hydroxymethyl,4&beta;,14&alpha;-dimethyl-9&beta;,19-cyclo-5&alpha;-cholest-24-en-3&beta;-ol	52561.8	52264.3	47440.9	47993.4	43351.5	39701.9	30313.4	33453.7	55890.4	51598.1	91634.8	85228.1	47515.6	49437.3	51220	50922.8	75680.9	77810.1	50037.8	49832.2	61914.9	62582.8	49718.5	47862.5	60721.9	56132.2	70142.8	72939.3	97559.1	93592.2	54644.8	58967	69669.2	68472.5	63442.5	54918.4	42525.7	47145.7	38325.9	46010	48259.2	47932	55270.7	57930.7	68824.7	62753.4	60687.2	59503.3
CPD-12917	4&alpha;-hydroxymethyl-5&alpha;-cholesta-7,24-dien-3&beta;-ol	1	1	1	1	1	65669.8	53766.5	1	1	1	176159	182981	1	99157.1	64299.4	1	119955	150908	1	107606	1	1	78828.1	1	104129	1	95236.3	106097	173472	154424	103170	98223.8	1	120759	71531.2	1	1	120951	81442	62370.6	1	92936.6	90492.2	118308	130673	133893	1	119067
CPD-12918	4&alpha;-formyl,4&beta;,14&alpha;-dimethyl-9&beta;,19-cyclo-5&alpha;-cholest-24-en-3&beta;-ol	42911.2	42600.5	38439.1	31365.1	28945.2	23728.4	19338	25950.7	34257.3	31080.8	64661.7	1	36423.4	35720.3	37385.9	40183.2	54887.4	55068.1	38588.7	38598.4	47177.5	44558.8	31568.6	26881.4	43107.3	38081.4	52247	51210	1	1	44219.7	44140.6	52260.6	49093.3	38440.2	38678.3	22311.6	34337.8	21955.8	23886.4	29827.6	25294.5	37479.5	47744.7	49459.1	43661.8	45191.4	36913.4
CPD-12919	4&alpha;-carboxy,4&beta;,14&alpha;-dimethyl-9&beta;,19-cyclo-5&alpha;-cholest-24-en-3&beta;-ol	13305059	13253397	11407309	11648771	9158257	8550569	7660979	7.9137e+06	10139342	10694174	16847532	16313521	12786426	11806642	11978053	12134887	16111192	16092937	11320679	12532653	12010087	12023634	10579291	10307648	11987986	13248945	14844457	14873165	16402924	16339866	13881829	13856681	14205187	14575644	12840814	12335752	16430594	14485590	14698961	14471452	14196542	14161371	14766343	14305491	14929308	15094090	15329547	15363659
CPD-12920	4&alpha;,14&alpha;-dimethyl-9&beta;,19-cyclo-5&alpha;-cholest-24-en-3-one	126741	118218	187539	198081	282171	284959	18310.4	18674	28361.5	24556.2	94571.5	83772.7	43001.1	1	25891.5	55857.9	211381	207267	62600.3	49687.7	17956.1	16977.3	82662.6	33557	25958.1	25221	147799	1	1	1	146073	145414	43479.1	122565	94413	35805.2	11492.9	16761.1	74142.2	18681.1	68776.9	69335.5	49833.8	56472.6	189908	64573.5	198675	167367
CPD-12927	4&alpha;-formyl-5&alpha;-cholesta-7,24-dien-3&beta;-ol	1.49081e+06	1.4739e+06	1.28321e+06	1.33166e+06	990111	865180	731958	707162	1.03369e+06	1.11231e+06	1.79574e+06	1.74182e+06	1.38231e+06	1.26675e+06	1.23586e+06	1319008	1.79715e+06	1.68604e+06	1255341	1.36604e+06	1.24087e+06	1.24691e+06	1.00929e+06	1.09739e+06	1.13647e+06	1.38584e+06	1.59865e+06	1.61091e+06	1705143	1.70055e+06	1.40104e+06	1.49495e+06	1.51571e+06	1.50185e+06	1.40753e+06	1306768	1.81949e+06	1.52145e+06	1.49596e+06	1.53419e+06	1.41827e+06	1.50098e+06	1.63007e+06	1.57417e+06	1.58178e+06	1.64299e+06	1.66547e+06	1.70509e+06
CPD-12928	4&alpha;-carboxy-5&alpha;-cholesta-7,24-dien-3&beta;-ol	364236	367958	292055	302856	220545	195871	183501	1	259845	266869	552297	517510	354355	305281	304239	322978	361436	538863	287388	334235	327626	347772	254192	258264	340791	378829	462377	460973	431433	567030	421860	302188	437532	462158	355955	1	489421	404043	419989	391540	394769	381031	453020	423163	460610	447464	472472	440416
CPD-12929	5&alpha;-cholesta-7,24-dien-3-one	1	1	201298	214260	105584	112055	36005.8	32466	42887.4	99903.9	64101.7	64123.4	106508	113133	291510	305562	154372	150461	1	1	45503.6	46005.9	35926.3	41545.2	584952	576328	55893.4	53637.7	68773.9	74242.6	1	1	40125.1	41169.4	40540.9	39542.4	1	1	36448.8	41488.7	40912.7	41655.7	60804	61602.7	53072.1	51623.9	42920.2	36336
CPD-1301	tetrahydropteroyl tri-L-glutamate	50985.2	50135.7	12838.5	12660.2	1	1	19333.2	13173.8	1	1	146124	128916	73791.1	71546	15683.9	21229.5	80029.8	74925.1	78613	91952.6	1	1	1	1	101592	122268	21261	15770.6	1	1	81845.8	86034.3	1	1	1	1	62249.8	59299.4	26223.7	20487.2	1	1	68108.2	63611.5	13042.6	13756.6	22919.8	19342.4
CPD-13014	tributyrin	1	1	1	1	1	1	1	1	1	1	1	1	1	1	13375.2	1	1	1	17143.9	1	1	1	1	1	63869.9	61734	40013.3	34936.4	10960.9	1	1	1	1	1	1	1	1	1	1	1	1	1	1	1	11507.2	1	1	1
CPD-13040	1,2-dibutyrin	1	1	1	1	1	1	1	1	1	1	28902.5	29261.8	1	1	1	1	11907.6	10522.8	1	1	1	1	1	1	1	1	10419.9	1	1	1	1	15898.6	1	1	1	1	1	10711.6	10784.3	1	38591	36566.1	1	1	10413.7	1	31659	39168.7
CPD-13047	friedelin	1	54620.3	48835.1	50479.3	40340.2	47836.9	43398	41148.8	58515.4	55306.8	98288.8	93634.6	55058.7	56783.3	52432.6	52608.6	1	94201.2	63167.8	55951.4	58761.6	59669.7	46460.7	53100.8	1	62000.2	80373.9	79637.1	111136	108928	1	1	65935.9	66768.3	53597.8	53234.3	53200.3	61762.2	45369.4	52569.9	55185	53569.1	82234	92737.1	77099.7	71944.1	61318.3	59080.8
CPD-13048	glutinol	1	54620.3	48835.1	50479.3	40340.2	47836.9	43398	41148.8	58515.4	55306.8	98288.8	93634.6	55058.7	56783.3	52432.6	52608.6	1	94201.2	63167.8	55951.4	58761.6	59669.7	46460.7	53100.8	1	62000.2	80373.9	79637.1	111136	108928	1	1	65935.9	66768.3	53597.8	53234.3	53200.3	61762.2	45369.4	52569.9	55185	53569.1	82234	92737.1	77099.7	71944.1	61318.3	59080.8
CPD-13049	multiflorenol	1	54620.3	48835.1	50479.3	40340.2	47836.9	43398	41148.8	58515.4	55306.8	98288.8	93634.6	55058.7	56783.3	52432.6	52608.6	1	94201.2	63167.8	55951.4	58761.6	59669.7	46460.7	53100.8	1	62000.2	80373.9	79637.1	111136	108928	1	1	65935.9	66768.3	53597.8	53234.3	53200.3	61762.2	45369.4	52569.9	55185	53569.1	82234	92737.1	77099.7	71944.1	61318.3	59080.8
CPD-13080	solasodine	33196084	32544202	35472444	35779652	35035740	36188844	15796272	16082322	26977528	26844610	31468474	30874742	30689394	30993276	30772846	30854712	31276426	29805692	25763454	24907666	27277160	28438258	28682104	28229026	32779204	31181190	46268932	44781020	39400076	40710444	33881312	33213232	32006380	32701448	28152822	28199822	33709176	34963836	32801538	34968048	39262608	38876204	35315064	34792908	386028	50915924	442666	520550
CPD-13081	solasodine 3-O-&beta;-D-glucoside	670656	629520	461568	140661328	136520496	141503600	65402968	66753888	113448872	802407	129883216	128400120	633014	547247	120898944	123103696	284098	118847776	109331248	104357760	114736928	632332	697994	116456048	818393	121008256	2.48021e+06	2.2668e+06	1.28943e+06	1.26785e+06	1164485	1194590	125390592	127838336	111327816	110157200	1.21169e+06	1.49041e+06	1.31374e+06	1.48157e+06	1795473	1.57377e+06	1.33718e+06	135177232	1.54865e+06	1.18559e+06	2126707	2.60705e+06
CPD-13087	(9Z)-12,13,17-trihydroxyoctadeca-9-enoate	59761.1	68906.6	81942.8	88521.4	42737.2	35811.9	1	1	47817.9	50664.8	72886.4	72788.3	64325.1	54336.3	67841.8	70583	65293.2	64476.9	152955	135572	125824	129477	105234	44154.1	21001.2	27360.4	69231.8	65984.6	38879	45105.2	35292.5	35292.1	35249.5	30555.1	26813.7	31814.2	12655.4	12231.9	20090.9	19803.2	30647.1	36845.1	1	1	18009.1	11192.6	32051.4	30043.9
CPD-13089	(12Z,15Z)-9,10-epoxyoctadeca-12,15-dienoate	88391.7	79976.5	61581.1	61872.6	42554.3	50342.5	36428.9	26754.1	1	55613.9	101138	98180.9	67518.6	65716.3	71167.5	72667.5	109423	103728	16057.6	24037.1	13956.1	14056.6	11709.4	11893.9	1	70445.8	1	80781	117952	107739	88634.4	84333.6	86906.6	93448	71318.9	74055.6	74929.5	75819.5	69267.2	67790	60758.3	60875.5	83169.1	78519.2	84554.4	81095.1	77998.8	82138.1
CPD-13090	(9Z,15Z)-12,13-epoxy-octadeca-9,15-dienoate	88391.7	79976.5	61581.1	61872.6	42554.3	50342.5	36428.9	26754.1	1	55613.9	101138	98180.9	67518.6	65716.3	71167.5	72667.5	109423	103728	16057.6	24037.1	13956.1	14056.6	11709.4	11893.9	1	70445.8	1	80781	117952	107739	88634.4	84333.6	86906.6	93448	71318.9	74055.6	74929.5	75819.5	69267.2	67790	60758.3	60875.5	83169.1	78519.2	84554.4	81095.1	77998.8	82138.1
CPD-13091	(9Z,12Z)-15,16-epoxyoctadeca-9,12-dienoate	88391.7	79976.5	61581.1	61872.6	42554.3	50342.5	36428.9	26754.1	1	55613.9	101138	98180.9	67518.6	65716.3	71167.5	72667.5	109423	103728	16057.6	24037.1	13956.1	14056.6	11709.4	11893.9	1	70445.8	1	80781	117952	107739	88634.4	84333.6	86906.6	93448	71318.9	74055.6	74929.5	75819.5	69267.2	67790	60758.3	60875.5	83169.1	78519.2	84554.4	81095.1	77998.8	82138.1
CPD-13171	15,9'-di-<i>cis</i>-phytofluene	143678	1	107870	107836	80936.5	83728.6	67384.3	73753.1	116968	110010	199354	190673	113394	122424	121270	127667	1	173159	122800	121744	127507	129786	101732	102469	138201	142632	1	1	218717	212209	140380	137814	161817	157133	127186	126436	108149	131234	99186.2	96351.2	103498	104394	1	1	162065	150792	135983	123005
CPD-13218	pent-1-en-3-one	45151.8	30744.1	1	1	51223.1	43148.2	29690.3	33183.6	61021.1	35094.2	65213.3	51080.3	1	54261.6	43794	57572.8	1	50950.5	43414.3	67655.5	46861.6	45733.2	60710.7	57429	29390.3	39807.9	57977.8	59190.1	46278.3	52384.2	47227.4	1	50513.8	56379.1	72983.8	56854.5	52152.5	46717	44999.4	44346.3	54616.2	58610.1	45195.7	40863.6	37123.2	46307.8	51464.4	40309.5
CPD-13220	1-pentan-3-one	573173	506552	515562	580650	557243	646942	296630	246961	287275	372419	27598.6	320960	575234	604457	652579	674229	625153	565245	342821	11132.7	329544	324406	288889	413104	464167	501083	462016	572233	552365	475217	552750	526873	553899	511183	561366	476865	30133.3	352808	358801	416152	424642	410753	38537.5	40461.2	57398.9	46010.5	59493.1	59844.5
CPD-13222	<i>trans</i>-4-hexen-3-one	10464806	10577550	13184967	13146005	9963590	9977692	6.58711e+06	6663947	12748957	13363555	11547923	11766241	13433927	13695894	13060204	8920183	8976039	12564647	10332445	6.42567e+06	11027071	6953342	11261309	11238471	11283423	11280329	13542861	8801163	12673602	12416208	9655358	9722772	13335887	8442561	11801267	11684069	7080640	7118674	8.10254e+06	8.06752e+06	6.59143e+06	6492763	2.1952e+06	2.19119e+06	7476882	7.39996e+06	5.58602e+06	5936456
CPD-13223	hexan-3-one	1	1	10563.6	16765.1	10259.8	16828.5	1	1	1	1	1	17353.6	6137.95	10346.2	10625.1	33234.4	1	49987.5	1	29946.2	44881.3	1979.34	1	1	10577.7	1	1	1	1	28056.6	22955	1	1	10352.3	1	1	27650.4	1	44541.9	16591.9	16301.9	5648.87	42194	21423.9	10562.7	21879.6	11032.5	21471
CPD-13228	(<i>E</i>)-2-pentenal	45151.8	30744.1	1	1	51223.1	43148.2	29690.3	33183.6	61021.1	35094.2	65213.3	51080.3	1	54261.6	43794	57572.8	1	50950.5	43414.3	67655.5	46861.6	45733.2	60710.7	57429	29390.3	39807.9	57977.8	59190.1	46278.3	52384.2	47227.4	1	50513.8	56379.1	72983.8	56854.5	52152.5	46717	44999.4	44346.3	54616.2	58610.1	45195.7	40863.6	37123.2	46307.8	51464.4	40309.5
CPD-13229	(<i>E</i>)-2-pentenol	573173	506552	515562	580650	557243	646942	296630	246961	287275	372419	27598.6	320960	575234	604457	652579	674229	625153	565245	342821	11132.7	329544	324406	288889	413104	464167	501083	462016	572233	552365	475217	552750	526873	553899	511183	561366	476865	30133.3	352808	358801	416152	424642	410753	38537.5	40461.2	57398.9	46010.5	59493.1	59844.5
CPD-13243	geranyl monophosphate	1	1	1	1	1	1	1	1	1	1	1	1	1	1	1	1	1	1	1	1	1	1	1	1	1	1	1	1	1	1	1	1	1	1	1	1	1	1	1	1	1	1	1	1	1	1	1	1
CPD-13248	artemisinate	1	1	13253.4	26871.3	1	1	1	1	1	1	1	1	1	1	1	11904	1	1	1	11077.3	17203.5	1	1	1	95493.4	87788.8	29839.8	22399.1	11414.7	19048.6	1	1	1	11430.8	11780.4	12976.7	1	1	1	1	1	11877.1	1	1	29271.7	24222.6	48852.3	18900.6
CPD-13254	soyasaponin III	11183.6	11550	22994.9	19846.5	1	1	1	1	1	17471.7	1	1	10894.6	1	17090.3	12645.6	23931	25542.3	34896	1	1	1	1	13407	1	1	17952.1	23190.1	1	1	18480.7	17991.5	35750.4	39019.1	26051.2	19415.4	10727.9	11351.6	25399.1	24503.6	28602.2	34933.5	11093.2	17226.1	25814.6	25730	28961.2	28768.2
CPD-13255	soyasaponin I	146190	152058	149572	137714	102526	97478.4	81832.9	103064	181478	114020	1	107370	106567	94988	149302	158720	142197	159879	230293	232255	95607.8	371324	386014	360020	39464.5	50430.5	192758	193764	158107	161482	20824.4	20152.6	316026	124279	106317	87374.9	187806	181386	164976	154215	1	1	229562	237952	204385	190803	1	1
CPD-13346	butyl acetate	1	1	1	1	1	1	1	1	1	1	1	1	1	1	1	1	11578.8	15674.5	1	1	1	1	1	1	1	1	1	1	1	1	1	1	1	1	1	1	1	17719.9	1	22524.7	17018.8	17163	1	1	10846.6	1	10562.2	1
CPD-13354	salidroside	1	120219	234633	134372	92252.1	92964.6	1	1	115721	94858.9	171871	167019	118256	108824	158335	126209	154134	158292	123986	118145	137303	169462	130291	199997	106923	69909	1	1	117637	1	137417	123724	1	144683	121560	119061	3955.67	24893.7	1	26316.8	41910.2	65359.8	100676	1	62290.8	44299.4	67413.2	69144.4
CPD-13357	(2<i>R</i>)-2,3-dihydroxy-3-methylbutanoate	29617.6	24677.9	30045.9	27675.4	1	19088.7	12667	1	75932.9	84148	109351	112226	22029	22957.7	28614	32865.3	96844.6	99916.1	31831.6	28972.4	35747.5	31537.4	25417.8	27678.1	1	15981.3	30641.3	33743.1	17172.8	16941.5	30235.5	30881.4	37790.8	38692.5	33725	32346.3	47707.7	48295.7	50598.3	49197.7	49984.6	55284.9	25865.7	18893.7	102474	109122	31651.3	27691.1
CPD-13368	<i>all-trans</i>-10'-apo-&beta;-carotenal	1	1	1	1	1	1	360117	386628	1	1	1	1	1	1	26192.4	1	1	18208.7	127621	118764	105162	109747	1	17352.8	347840	360041	1	1	146730	150406	1	1	1	35405.2	21289.4	20122.4	1	1	17186.4	17699.1	1	1	26546.1	25921.7	1	1	13847.7	17858.8
CPD-13369	13-apo-&beta;-carotenone	1	1	32162.9	36928.6	17215.2	12608.4	1	1	1	1	12248.6	18086.9	17768	19772.1	23306.6	16342.6	21330.7	12458.6	1	1	1	1	1	1	1	1	21205.3	20825.2	33619.1	36919	1	1	15597.6	11283	1	1	1	1	1	1	18803.8	16644	1	1	1	1	18289.5	17991.2
CPD-13370	(2E,4E,6E)-4-methylocta-2,4,6-trienedial	168134	1.1108e+06	1	1	848291	12706.5	1	1	1	1	1	1	1	11700.8	1	18285	815030	12646.1	1	1	1	1	1	1	434946	426113	584959	590819	548974	533912	185650	405864	828319	823807	1	720882	1	1	18270.4	24646	16501.9	316226	10929.5	179908	191177	168482	75394.7	153138
CPD-13420	(+)-7-<i>epi</i>-12-hydroxyjasmonoyl-L-isoleucine	46683.6	93328.9	118513	108260	36927.7	37959.1	1	1	31303.2	36549	61979.8	13118.9	95115.2	95381.3	119035	119263	32048.3	30210	18278.7	19272.1	12176.2	17964.7	23447.6	19669	1	1	64273.2	17949.9	27879	10835.4	30205.2	103852	35651.8	76530.8	59499.2	55071.4	1	12230.2	17747	14100.8	29141.4	23517.9	1	1	42500.4	37285.9	50713.2	54162.8
CPD-13428	&alpha;-L-galactopyranose	820412	878758	1.25882e+06	1.22293e+06	310300	65275.3	47496.3	26202.3	2134499	985698	107029	907661	1.14597e+06	639575	1.17112e+06	1.20168e+06	1.01073e+06	987522	296172	249093	268654	180608	132094	186752	81539	127229	1	133984	132312	119542	407991	519398	388860	31467.5	350478	353424	1167135	1.00522e+06	1.04997e+06	961638	1099263	1.07598e+06	1.39765e+06	1.39441e+06	1.36252e+06	1.41268e+06	1.58136e+06	1.51725e+06
CPD-13511	rhamnetin	28538.6	22267.4	81303.3	89713.8	11402.6	17005.6	15887.1	10558.9	85238.7	79923.6	85384.6	71244.6	84800.8	10882.8	99407.3	106286	88563.1	70142	96270	88403.7	16128.8	107962	63960.5	68689.3	171493	169764	51954.2	41184.5	120909	117242	48853.6	66340.7	105099	110875	117088	121726	224752	207484	196107	184765	124516	128151	168476	169267	127543	131771	109556	114217
CPD-13518	N<sup>&omega;</sup>-hydroxy-L-arginine	39364.4	34390.8	95356.1	84510.5	39659.7	52280.4	142120	141577	139145	127551	74332.4	68291.4	35337.4	42969.2	139457	151020	76197.8	76770.3	100442	88058.2	97935.2	96393.7	31953.7	43941.5	308380	275280	354105	338687	92705	95283.9	74438.7	80245.5	80083.6	79072.1	95192.3	84974.1	42352.1	54785.3	74688	82625	44963.2	43665.8	86155.8	91748.3	129825	133665	120482	134465
CPD-13559	&alpha;-D-mannopyranose	820412	878758	1.25882e+06	1.22293e+06	310300	65275.3	47496.3	26202.3	2134499	985698	107029	907661	1.14597e+06	639575	1.17112e+06	1.20168e+06	1.01073e+06	987522	296172	249093	268654	180608	132094	186752	81539	127229	1	133984	132312	119542	407991	519398	388860	31467.5	350478	353424	1167135	1.00522e+06	1.04997e+06	961638	1099263	1.07598e+06	1.39765e+06	1.39441e+06	1.36252e+06	1.41268e+06	1.58136e+06	1.51725e+06
CPD-13610	3-dehydrosphinganine (C20)	618956	597075	78345.4	79401.6	22909.5	13880.2	31085.1	31787.6	38337.9	61429.8	89196.8	86143.9	127518	128602	64444.5	66884.9	93858.4	47251	278914	286975	33086	30911.6	27375.6	28654.8	298190	308849	49951.4	49733.1	46187.8	48072.1	572036	545398	53425.8	52564.2	32112	37498.5	543874	514092	32513.1	71061.3	22947	11336.3	128022	121423	38982.6	38060.1	17155.8	38575.2
CPD-13611	sphinganine (C20)	18457.5	13092.6	12045.4	12880.4	45596.2	47657.8	45553.2	43647.1	55644.4	52944.4	27262.1	30100.5	11644.1	11748.4	16755	12808.1	28816.1	27785.6	11260.4	12464.3	11192.9	11883.2	54622.7	62530.1	13858.7	18534	20330	21587.7	27714	21063.6	12887.8	12004.9	21108.3	22369.9	13135.8	12394.1	20374.5	19070.4	12081.2	12729.6	13532.6	12417.5	12787.7	20179.7	19447.8	20493.7	20988.2	21415.9
CPD-13612	sphinganine (C18)	169756	169728	180361	185389	170934	180213	197898	185478	230301	208220	277522	273655	193194	191375	203427	204829	256687	239315	193098	180644	233715	232204	205286	212377	270166	259074	241756	236207	280141	284728	172892	158916	230539	227503	211808	216784	129968	169472	163429	169706	188849	181409	189684	201108	228663	217418	194717	202313
CPD-13667	11-oxo-&beta;-amyrin	42911.2	42600.5	38439.1	31365.1	28945.2	23728.4	19338	25950.7	34257.3	31080.8	64661.7	1	36423.4	35720.3	37385.9	40183.2	54887.4	55068.1	38588.7	38598.4	47177.5	44558.8	31568.6	26881.4	43107.3	38081.4	52247	51210	1	1	44219.7	44140.6	52260.6	49093.3	38440.2	38678.3	22311.6	34337.8	21955.8	23886.4	29827.6	25294.5	37479.5	47744.7	49459.1	43661.8	45191.4	36913.4
CPD-13668	30-hydroxy-&beta;-amyrin	52561.8	52264.3	47440.9	47993.4	43351.5	39701.9	30313.4	33453.7	55890.4	51598.1	91634.8	85228.1	47515.6	49437.3	51220	50922.8	75680.9	77810.1	50037.8	49832.2	61914.9	62582.8	49718.5	47862.5	60721.9	56132.2	70142.8	72939.3	97559.1	93592.2	54644.8	58967	69669.2	68472.5	63442.5	54918.4	42525.7	47145.7	38325.9	46010	48259.2	47932	55270.7	57930.7	68824.7	62753.4	60687.2	59503.3
CPD-13669	11&alpha;,30-dihydroxy-&beta;-amyrin	256660	267947	293609	315341	170168	172990	12648	43945.1	77089.4	35931.7	180051	184916	223450	218944	34237	39890.5	186447	202931	40111.9	101048	127190	47270.9	109853	35503.3	48566.6	50934.9	221723	227558	209986	208070	275164	259832	57395	151344	52013.9	145764	42043.1	46974.6	37498.6	37887.1	39407.6	37930	165745	163409	411761	426595	359238	348582
CPD-13670	30-hydroxy-11-oxo-&beta;-amyrin	3.10732e+06	3098420	2498238	2.57147e+06	2.02125e+06	2039750	1.77074e+06	1.71919e+06	2381739	2.48936e+06	4.06696e+06	3.92908e+06	2980500	2.58565e+06	2637269	2.88345e+06	3.66428e+06	3.90442e+06	2.47416e+06	2.89554e+06	2.80289e+06	2.84504e+06	2.46843e+06	2.41107e+06	2642002	3.15961e+06	3603875	3.59569e+06	4.06134e+06	4037288	3.0613e+06	3.26846e+06	3.19226e+06	3.23752e+06	2.84768e+06	2.93899e+06	3.89566e+06	3384831	3.42455e+06	3324264	3.28116e+06	3261301	3.32497e+06	3396429	3.30389e+06	3.58804e+06	3.64351e+06	3.45539e+06
CPD-13811	DIBOA-&beta;-D-glucoside	69273.1	72637.6	90459.1	82982.8	29754.4	38197.6	1	1	36789.4	37710.3	72285.4	79979.7	79307.5	89021	110596	110178	94331.8	86853.4	66191.5	63133.9	83993.8	97749.3	1	1	170878	154273	21762.1	36495.4	137669	130950	100890	92230.4	133026	131147	131305	129592	114732	121581	80529.3	92597.6	35785.9	30185.5	78922.9	73432.2	64268.1	66020.8	83536.4	82058
CPD-13885	&delta;-amyrin	1	54620.3	48835.1	50479.3	40340.2	47836.9	43398	41148.8	58515.4	55306.8	98288.8	93634.6	55058.7	56783.3	52432.6	52608.6	1	94201.2	63167.8	55951.4	58761.6	59669.7	46460.7	53100.8	1	62000.2	80373.9	79637.1	111136	108928	1	1	65935.9	66768.3	53597.8	53234.3	53200.3	61762.2	45369.4	52569.9	55185	53569.1	82234	92737.1	77099.7	71944.1	61318.3	59080.8
CPD-13907	dehydroascorbate (bicyclic form)	862512	847480	684625	708976	568990	568860	141657	132031	5926.82	23016	416235	57015.4	505108	512264	542454	541829	545913	548992	294475	277895	27849.1	237172	180147	173809	175317	49980.8	345258	48613	256506	258287	33591.3	38013.5	395349	376548	249835	44828.3	109458	108769	115546	117505	69715	70388.6	43183.3	47320.9	1	1	1	1
CPD-13908	selenodiglutathione	21835.5	21955.9	802138	826688	671518	687161	574947	572675	757035	769766	45698.1	40168.8	11750.4	826046	10360.1	10698.8	39000.6	37580.1	793038	818108	922474	930149	767548	778039	10939.1	15963.3	23733.1	23257	40205.3	34834.6	16867.2	18334.3	28989.5	30632.2	909047	22624.2	33190.1	16114.9	794168	797862	11059.9	769311	18236.9	18406.5	27235	11234.7	17439.4	21929.6
CPD-13912	2-carboxy-L-<i>threo</i>-pentonate	113098	113575	110594	117658	111775	105395	114172	105686	119169	115734	114417	113244	103700	113199	119673	113589	109473	114088	127231	115705	129222	131221	95813.7	93317.5	145156	143610	88812.8	1	131649	1	104369	105284	129996	125134	128288	124952	136720	134470	116259	117421	99683.9	98090.3	124465	118825	109790	116344	100778	100074
CPD-13913	2-carboxy-L-xylonolactone	103490	95246	92308.1	89988.8	81762.5	50653.6	87821.2	96303.9	108758	97180.4	108374	111168	91780	88619.4	97720.4	90116.5	94587	74804.6	112345	105432	124698	124074	82703.3	69159.8	126730	120099	88153.1	67262.7	97748.2	105586	94789.4	86495.2	101798	112637	100627	115388	75174.1	84434.8	81178.2	95551.7	132692	126396	101262	106383	101431	97392.6	165322	164495
CPD-14053	(6<i>R</i>)-L-<i>erythro</i>-5,6,7,8-tetrahydrobiopterin	1	1	1	1	1	1	1	1	1	1	1	1	1	1	1	1	1	1	1	1	1	1	1	1	1	1	1	1	1	1	1	1	1	1	1	1	542553	546794	530565	532239	524987	522882	653888	654012	530270	534744	390891	388939
CPD-14080	CDTA	25121.1	26920.1	28056.5	20598.9	33164.9	34514.2	26488.8	28008	35504.1	36985	35547.3	28001.9	26769.5	28886.6	30271.1	27459.4	29849	20694.3	30050.1	29346.2	36544.6	28130.2	34725.1	34963.2	29278	25618.4	28257.2	29132.4	27273.5	28284.4	27950.6	20236.5	27371.8	30865.6	20614.6	27800.2	10765.6	26872.3	1	15898.4	11159.6	15923.6	17734.4	18022.6	19578.3	18174.3	19600.9	1
CPD-14133	(<i>R</i>)-NADPHX	111739	113639	98331.2	93814.6	70140.7	56013.8	65805.5	58073.5	81424.1	93608.5	157617	157896	106702	95180.8	92088.2	99600.7	157728	151686	80895.2	92172.6	102971	104816	89425.1	92459.3	101217	117774	127115	125964	176419	180926	117962	112423	125720	138041	115714	108455	190139	147095	140372	132292	130538	127112	128807	113754	126695	131069	137428	139659
CPD-14242	3-oxo-myristate	1	1	1	1	1	1	1	1	1	1	1	1	1	1	1	1	1	1	126140	121332	46987.9	50218.9	95957	42872.2	1	1	1	1	1	1	1	1	1	1	1	1	1	1	1	1	1	1	1	1	1	1	1	1
CPD-14378	dehydrospermidine	1	1	1	1	1	1	1	1	1	1	1	1	1	1	1	1	1	1	1	1	1	1	1	1	1	1	1	1	1	1	1	1	1	1	1	1	1	1	1	1	1	1	1	1	1	1	1	1
CPD-14385	(+)-<i>trans</i>-abscisic aldehyde	29782.2	31638	1.21362e+06	1.26201e+06	46873.8	1243296	952340	954992	1.00187e+06	1.09596e+06	1.05327e+06	1.02179e+06	1.235e+06	1.3048e+06	41131.4	1.53978e+06	39681.4	30521	1112121	1.0455e+06	1.15929e+06	1259988	735716	940450	2.08951e+06	1.78756e+06	57894.4	131964	1.77556e+06	51938	21709.8	16856.9	27735.5	1.52021e+06	28190	1.43662e+06	27500.6	32733.2	1.43782e+06	27820.4	43954.2	42998.5	53808.6	1.32827e+06	1.21431e+06	1.23683e+06	1.32748e+06	1.2824e+06
CPD-14430	7-hydroxy-8-methoxycoumarin	69974.3	10796.6	11353.6	11402.8	68881.5	60201.5	25454.4	35695.7	10242.8	51257.6	12175.5	16835.4	62132.8	57247.7	64167.8	64402.3	58045.1	54552.2	64929.2	54134.8	60540.8	62004.5	10713.2	11290.9	56449.7	50763.2	30206.1	31051.3	17440	57401.7	57889.9	11918.9	63979.3	64645.9	57166.1	40803.4	10858.2	58228.4	10730.9	53206.7	24320	54917	23113.2	17433.3	46161.5	41674	47764.7	86244.7
CPD-14452	scoparone	172768	56359.7	123011	123346	15719.1	53392.7	56897	34555.5	46833.9	192888	226619	236500	45909	45239.5	233799	73191.1	50958	51764.1	68693.1	68948.9	253080	240065	285553	273491	57220.6	37543.1	117333	10984.1	27283.7	32723.7	382390	386204	276462	310414	56516	51476.8	89408.3	21828.8	109970	1	159377	155709	1	125429	205546	63708.6	16052.9	17169
CPD-14453	isoscopoletin	69974.3	10796.6	11353.6	11402.8	68881.5	60201.5	25454.4	35695.7	10242.8	51257.6	12175.5	16835.4	62132.8	57247.7	64167.8	64402.3	58045.1	54552.2	64929.2	54134.8	60540.8	62004.5	10713.2	11290.9	56449.7	50763.2	30206.1	31051.3	17440	57401.7	57889.9	11918.9	63979.3	64645.9	57166.1	40803.4	10858.2	58228.4	10730.9	53206.7	24320	54917	23113.2	17433.3	46161.5	41674	47764.7	86244.7
CPD-14483	glycyrrhetinate	148793	147876	39937.9	124368	29833.2	22870.5	47828.4	49324	27740.3	131856	255543	261880	31260.5	31314.8	149883	144962	316236	314585	157963	139778	170110	164945	31717.9	31847.2	16976.8	13069.3	249228	243531	260742	268547	38699.1	159618	239915	249030	150768	151462	49953.1	146928	45924.1	42846.2	45608.4	44490.3	154884	180458	175612	29880.5	48460.2	153308
CPD-14485	glycyrrhetaldehyde	193125	181624	257208	250741	220550	244180	194074	202872	306684	276499	421626	427233	277618	261915	286701	283980	367982	361942	265106	273485	369442	363185	287249	292613	246785	268903	375231	374648	453446	476681	229124	216639	364914	360094	333747	326306	140561	171838	1	177293	200037	193155	286895	323288	344619	300387	287677	270310
CPD-14491	betulin	52561.8	52264.3	47440.9	47993.4	43351.5	39701.9	30313.4	33453.7	55890.4	51598.1	91634.8	85228.1	47515.6	49437.3	51220	50922.8	75680.9	77810.1	50037.8	49832.2	61914.9	62582.8	49718.5	47862.5	60721.9	56132.2	70142.8	72939.3	97559.1	93592.2	54644.8	58967	69669.2	68472.5	63442.5	54918.4	42525.7	47145.7	38325.9	46010	48259.2	47932	55270.7	57930.7	68824.7	62753.4	60687.2	59503.3
CPD-14492	betulinic aldehyde	42911.2	42600.5	38439.1	31365.1	28945.2	23728.4	19338	25950.7	34257.3	31080.8	64661.7	1	36423.4	35720.3	37385.9	40183.2	54887.4	55068.1	38588.7	38598.4	47177.5	44558.8	31568.6	26881.4	43107.3	38081.4	52247	51210	1	1	44219.7	44140.6	52260.6	49093.3	38440.2	38678.3	22311.6	34337.8	21955.8	23886.4	29827.6	25294.5	37479.5	47744.7	49459.1	43661.8	45191.4	36913.4
CPD-14493	betulinate	13305059	13253397	11407309	11648771	9158257	8550569	7660979	7.9137e+06	10139342	10694174	16847532	16313521	12786426	11806642	11978053	12134887	16111192	16092937	11320679	12532653	12010087	12023634	10579291	10307648	11987986	13248945	14844457	14873165	16402924	16339866	13881829	13856681	14205187	14575644	12840814	12335752	16430594	14485590	14698961	14471452	14196542	14161371	14766343	14305491	14929308	15094090	15329547	15363659
CPD-14494	uvaol	52561.8	52264.3	47440.9	47993.4	43351.5	39701.9	30313.4	33453.7	55890.4	51598.1	91634.8	85228.1	47515.6	49437.3	51220	50922.8	75680.9	77810.1	50037.8	49832.2	61914.9	62582.8	49718.5	47862.5	60721.9	56132.2	70142.8	72939.3	97559.1	93592.2	54644.8	58967	69669.2	68472.5	63442.5	54918.4	42525.7	47145.7	38325.9	46010	48259.2	47932	55270.7	57930.7	68824.7	62753.4	60687.2	59503.3
CPD-14495	ursolic aldehyde	42911.2	42600.5	38439.1	31365.1	28945.2	23728.4	19338	25950.7	34257.3	31080.8	64661.7	1	36423.4	35720.3	37385.9	40183.2	54887.4	55068.1	38588.7	38598.4	47177.5	44558.8	31568.6	26881.4	43107.3	38081.4	52247	51210	1	1	44219.7	44140.6	52260.6	49093.3	38440.2	38678.3	22311.6	34337.8	21955.8	23886.4	29827.6	25294.5	37479.5	47744.7	49459.1	43661.8	45191.4	36913.4
CPD-14496	ursolate	3.10732e+06	3098420	2498238	2.57147e+06	2.02125e+06	2039750	1.77074e+06	1.71919e+06	2381739	2.48936e+06	4.06696e+06	3.92908e+06	2980500	2.58565e+06	2637269	2.88345e+06	3.66428e+06	3.90442e+06	2.47416e+06	2.89554e+06	2.80289e+06	2.84504e+06	2.46843e+06	2.41107e+06	2642002	3.15961e+06	3603875	3.59569e+06	4.06134e+06	4037288	3.0613e+06	3.26846e+06	3.19226e+06	3.23752e+06	2.84768e+06	2.93899e+06	3.89566e+06	3384831	3.42455e+06	3324264	3.28116e+06	3261301	3.32497e+06	3396429	3.30389e+06	3.58804e+06	3.64351e+06	3.45539e+06
CPD-14498	oleanolic aldehyde	42911.2	42600.5	38439.1	31365.1	28945.2	23728.4	19338	25950.7	34257.3	31080.8	64661.7	1	36423.4	35720.3	37385.9	40183.2	54887.4	55068.1	38588.7	38598.4	47177.5	44558.8	31568.6	26881.4	43107.3	38081.4	52247	51210	1	1	44219.7	44140.6	52260.6	49093.3	38440.2	38678.3	22311.6	34337.8	21955.8	23886.4	29827.6	25294.5	37479.5	47744.7	49459.1	43661.8	45191.4	36913.4
CPD-14499	erythrodiol	52561.8	52264.3	47440.9	47993.4	43351.5	39701.9	30313.4	33453.7	55890.4	51598.1	91634.8	85228.1	47515.6	49437.3	51220	50922.8	75680.9	77810.1	50037.8	49832.2	61914.9	62582.8	49718.5	47862.5	60721.9	56132.2	70142.8	72939.3	97559.1	93592.2	54644.8	58967	69669.2	68472.5	63442.5	54918.4	42525.7	47145.7	38325.9	46010	48259.2	47932	55270.7	57930.7	68824.7	62753.4	60687.2	59503.3
CPD-14501	steviol	10703.1	104139	19351.7	18084.5	64544.5	65593	17117.8	22369.2	77582.1	64340.8	17611.8	128432	10915.8	94774.3	16177.2	10404.4	81285.7	80882.3	65955.2	77354.8	88565	82274	97954.6	95002.2	74985.4	60809	24741.3	19806.1	125433	10522.7	16247.8	16363.6	109826	113311	107375	106179	63112.9	65264.5	75221.4	79947.5	104089	108344	50151.3	57541.7	113948	111495	10319.5	168175
CPD-14503	steviolbioside	1	1	16632.6	18659.8	13395.1	18036.5	1	1	1	1	1	1	21300.8	20026.6	12395.3	11387.4	16276.5	17395.1	1	1	1	1	1	1	19948.7	22846.1	10389.3	18533.2	1	1	38365.3	40962.5	1	1	1	1	10944.5	47325.7	11379.9	17599.3	14180.6	11780.5	81367.5	83350.6	28647.9	35389.5	48716.7	59920.8
CPD-14504	stevioside	1	1	14128.5	18148.5	1	1	1	1	1	1	1	1	1	1	1	1	1	1	1	1	1	1	1	1	1	1	1	1	1	1	1	1	1	1	1	1	1	1	1	1	1	1	1	1	1	1	1	1
CPD-14553	UDP-&alpha;-D-galactose	330286	346868	312127	311945	268589	285650	247526	255435	320626	296385	444505	434625	314382	314362	340783	343152	430144	423031	310408	306536	356887	360457	320935	304967	406788	403527	368243	359421	549939	557632	380569	385328	392929	397635	338167	331124	358102	404464	282462	296040	294659	289946	370532	382592	370132	340321	313950	316762
CPD-14646	9-<i>cis</i>-&beta;-carotene	394381	395957	374778	388649	224478	246893	197219	194860	388305	348258	428553	442742	266712	284476	314434	376302	415577	454632	432470	296749	394725	454762	377015	363330	319118	299191	342767	483499	496594	512280	333696	472106	485781	473674	420740	409579	282151	338534	223150	237114	231267	228380	309857	343303	326125	300471	277016	271653
CPD-14647	9-<i>cis</i>-10'-apo-&beta;-carotenal	1	1	1	1	1	1	360117	386628	1	1	1	1	1	1	26192.4	1	1	18208.7	127621	118764	105162	109747	1	17352.8	347840	360041	1	1	146730	150406	1	1	1	35405.2	21289.4	20122.4	1	1	17186.4	17699.1	1	1	26546.1	25921.7	1	1	13847.7	17858.8
CPD-14649	carlactone	154412	150480	184832	186834	116485	109926	1	1	123987	118274	187824	193924	150591	151624	151593	147872	11318.4	150988	1	128654	147263	150898	139065	136680	98939.7	10790.4	220741	225452	162258	156490	162262	11798.2	142154	10515.9	11447.4	11626.9	135900	123325	155932	144552	189322	186734	110280	114352	157028	149142	212179	210428
CPD-14651	carlactone carboxylate	23453.2	10823.7	17475.8	11740.3	11101.7	1	1	1	17148	1	35895.3	24417.3	1	1	10814	11117.8	12239.3	1	16995.7	11341.6	17539.5	16845.1	12291	11382.8	1	1	26729.3	19105.6	25393.6	21177.7	11564.2	1	24816.5	19570	12464.9	18163.7	14242.9	12865.6	19180.3	20304.5	12404.6	12450.1	19008.2	12605.1	20108.4	26721	26491.1	23931.4
CPD-14652	(+)-5-deoxystrigol	75673.9	70208.2	256164	16112.5	209051	216777	60018.9	69191.2	295521	289112	23315.1	348889	23450.8	23469	86323.2	75051.6	106849	98920.7	11390.8	11841.9	23817.4	25039.1	17588.2	12148.2	151486	150549	336071	330416	312677	316181	127129	133300	317356	332172	43144.3	297683	290328	282729	279533	279125	30885	262467	283211	29856	302223	131422	310999	217927
CPD-14702	(22<i>R</i>)-hydroxycholesterol	79316.1	1	71034.6	1	34369.8	1	11293.8	33313.5	1	1	156217	160571	1	54921.1	1	1	1	18109	1	1	1	1	1	1	1	1	1	1	1	113523	1	1	1	1	1	1	49746	75833.7	1	1	1	1	78379.9	1	1	71684.2	79951.6	1
CPD-14731	geranyl 6-<i>O</i>-&beta;-<i>D</i>-xylopyranosyl-&beta;-<i>D</i>-glucopyranoside	321839	330879	516365	504399	131295	133425	95072.7	101300	253701	213884	387773	386803	251500	253494	281727	274621	281243	296805	211150	205956	288361	280799	330470	339534	273102	245863	747568	796676	464851	484583	401021	382019	356056	353565	302587	296949	224338	226529	240423	255962	347392	327076	154903	156953	404774	380158	595580	610145
CPD-14732	linalyl 6-<i>O</i>-&beta;-<i>D</i>-xylopyranosyl-&beta;-<i>D</i>-glucopyranoside	321839	330879	516365	504399	131295	133425	95072.7	101300	253701	213884	387773	386803	251500	253494	281727	274621	281243	296805	211150	205956	288361	280799	330470	339534	273102	245863	747568	796676	464851	484583	401021	382019	356056	353565	302587	296949	224338	226529	240423	255962	347392	327076	154903	156953	404774	380158	595580	610145
CPD-14734	benzyl alcohol 6-<i>O</i>-&beta;-<i>D</i>-xylopyranosyl-&beta;-<i>D</i>-glucopyranoside	382753	391856	404395	413910	264366	262531	158877	150410	346385	304445	535454	530196	394711	439755	442775	458343	469726	475182	391577	372047	381921	392163	387853	407322	331312	300829	608398	595747	305973	301194	552274	543038	484951	494211	456877	453003	326490	320763	383648	366350	451896	458720	338274	345754	753345	703792	913148	909721
CPD-14735	2-phenylethyl 6-<i>O</i>-&beta;-<i>D</i>-xylopyranosyl-&beta;-<i>D</i>-glucopyranoside	46447.7	50783.4	189693	187974	66616	56820.8	1	1	139709	117930	236722	167919	35839.5	176258	175423	68444.5	191033	181298	157965	145701	16738.4	17221.8	136001	152304	94329	64574.9	36372.7	232605	87172.4	82020.1	76562.5	80055	193638	72677.9	166427	45128.5	72326.2	68233	80029.6	81795.2	145943	134303	101391	92673.3	170529	122670	235732	230685
CPD-14736	L-kynurenine	29243.1	27259.7	1	70673	150903	115275	23234.2	29165.9	102213	1	186752	188883	77205.7	2.00017e+06	24750.9	107134	164086	96455.1	1	127179	1.65419e+06	132883	1	1	1	95442	182533	192910	143297	136757	127921	1	115680	1	127002	57758.6	2992.32	1	265339	1	106941	107573	426117	79521.7	117731	1	126986	130598
CPD-14737	eugenol <i>O</i>-&beta;-<i>D</i>-xylopyranosyl-(1->6)-<i>O</i>-&beta;-<i>D</i>-glucopyranoside	138312	146004	70707.7	72049	16339.3	23155.5	17479	18045.5	113447	95210.1	120723	113152	68446.5	70785.3	121453	119735	82711	78420.7	96345.8	11331	11885.5	11930	11795.7	11259.7	42803.8	32232.9	88324.7	93800.8	1	1	127484	129882	182375	191017	100961	101029	36105	36047.6	40525.4	35800.2	26183.8	26636.7	75775.8	64359.4	84215.8	241329	313305	297830
CPD-14739	benzyl 6-<i>O</i>-&beta;-<i>D</i>-apiofuranosyl-&beta;-<i>D</i>-glucopyranoside	382753	391856	404395	413910	264366	262531	158877	150410	346385	304445	535454	530196	394711	439755	442775	458343	469726	475182	391577	372047	381921	392163	387853	407322	331312	300829	608398	595747	305973	301194	552274	543038	484951	494211	456877	453003	326490	320763	383648	366350	451896	458720	338274	345754	753345	703792	913148	909721
CPD-14740	(3R,4R)-7,2',4'-trihydroxyisoflavanol	1	1	1	1	1	219553	1	1	1	1	506964	482216	1	1	233929	1	1	291012	1	1	1	1	1	1	1	1	501630	504250	361947	1	287573	292248	320517	295914	336286	339172	86595.9	81446.2	89927	99790.7	163340	169802	130513	130733	138291	137183	97484.5	104830
CPD-14741	(3R,4R)-3-(6-hydroxy-1,3-benzodioxol-5-yl)-3,4-dihydro-2H-chromene-4,7-diol	1	1	1	23485.4	1	1	1	1	11901.2	16276.6	39505.7	33277.4	1	17200	18163.2	19417.2	16460.1	23468.5	23802	16516.3	18102.7	16747.9	11291	1	1	1	1	40433	27989.9	27156.3	13432.2	1	23656.5	17542.4	11153.6	10561.5	1	1	10588	1	13450.7	25649.7	1	1	10884.6	10850.6	18468.8	18831.7
CPD-14742	linalyl 6-<i>O</i>-&alpha;-<i>L</i>-arabinopyranosyl- &beta;-<i>D</i>-glucopyranoside	321839	330879	516365	504399	131295	133425	95072.7	101300	253701	213884	387773	386803	251500	253494	281727	274621	281243	296805	211150	205956	288361	280799	330470	339534	273102	245863	747568	796676	464851	484583	401021	382019	356056	353565	302587	296949	224338	226529	240423	255962	347392	327076	154903	156953	404774	380158	595580	610145
CPD-14751	ajmaline	1	1	1	1	1	1	1	1	1	1	1	10917.4	1	1	1	1	18156	1	1	1	1	1	1	1	1	17821.1	1	1	10354.1	16436.4	10656.2	11338.7	1	1	1	1	1	1	1	1	1	10444.3	1	1	1	12240.7	22975.8	24126.8
CPD-14765	16-sinapoyloxypalmitate	405819	501705	666116	411150	237824	457181	59570.4	78239.1	123075	137210	302009	315627	485092	476073	203265	302166	447017	440603	191604	179499	195236	269269	253620	243759	324638	304899	667005	675310	321460	642276	617184	610855	306960	324727	421173	414776	122186	128815	114463	119543	190050	196315	199753	197768	396523	400405	293092	374320
CPD-14803	cis-abienol	162174	163404	675152	679769	174328	182139	198122	199496	328417	315112	164801	161106	928632	907441	255693	253743	382226	375326	1.70745e+06	1.7491e+06	53388.5	55472.4	1	1	1.05226e+06	1.03685e+06	142708	150512	89084.6	85199.8	1.10558e+06	1.11441e+06	243016	240300	65655.5	64434.3	614971	619069	457060	467173	92948.3	92364.1	1.30435e+06	1.33602e+06	384739	360336	300751	317249
CPD-14838	(+)-sesaminol 2-<i>O</i>-&beta;-<i>D</i>-glucoside	1	1	1	1	1	10983	1	1	1	1	1	1	1	1	1	1	1	1	1	1	1	1	1	1	1	1	1	1	1	1	1	1	1	1	1	1	62232.4	62229.2	1	1	1	1	1	1	1	1	1	57305.3
CPD-14893	ergost-7-enol	72712.2	1.64382e+06	1.40994e+06	1.44322e+06	1.11834e+06	1.0471e+06	37172.9	44586.8	57004.5	54822.3	102811	103345	1.57064e+06	1.49076e+06	1.44443e+06	1.49957e+06	102907	93272.8	57989.8	58580.6	1.59267e+06	61719.2	50598.9	52947.1	1.57493e+06	1.66948e+06	80842.6	84453.8	113564	121313	77484.1	1.7035e+06	1.81592e+06	78094.1	72764.4	1.56606e+06	1.96645e+06	1.74994e+06	1.67967e+06	1631505	1.61968e+06	1.62027e+06	1.90397e+06	85358.1	75148.3	1938232	68698.4	1.94504e+06
CPD-14894	ergosta-5,7-dienol	59769	59306.8	56152.3	60957.4	46955	49279.4	40943.6	41079.7	61542.2	60085.1	97492.9	102086	60005.9	54615.8	67125.4	62975.9	93972.8	88776	63181.5	60807.2	70026.2	74625.2	55870.1	58419.4	70986.3	70134.4	86880.8	86201.3	101937	105550	60621.5	56695.8	75516.1	76338.5	67319.5	63949.6	62474.3	61284.6	86883.1	92646.1	83350.2	77474	146376	147096	181554	180619	117161	119177
CPD-14934	7,4'-dimethylmyricetin	1	1	1	1	1	1	1	1	1	1	1	1	1	1	1	1	1	1	1	1	1	1	30664.4	31305.4	1	1	1	1	1	1	1	1	1	1	1	1	1	1	1	1	1	1	1	1	27460.5	28844.8	60533.8	58627.3
CPD-14936	3',4',5'-trimethylmyricetin	329294	327968	399841	410971	266797	262010	147454	142649	277573	278698	302355	303013	366155	373292	420295	424739	424248	416015	243320	239302	234958	219585	252357	261733	168348	172547	287225	285698	195609	197285	502527	509274	378172	387244	403643	399331	203256	192852	205659	199414	212982	211769	219940	220381	351356	351239	240910	230373
CPD-14937	7,3',4',5'-tetramethylmyricetin	40601.3	34667.8	59602	56013.9	25323.9	19903.7	1	1	28614.6	28260.7	57908.6	59237.2	41967.4	46059.1	45549.5	45503.5	47579.3	46643.6	31161.5	29445.6	41930.6	40484.6	28158.1	37046.7	17776.9	1	60609.3	62243.8	40481.3	35960.7	58251	51445.8	49362.6	42633.3	37265.4	36711.9	1	1	1	1	17576.6	24181.6	1	1	10893	16537.8	27004.1	26534.8
CPD-14940	7,3',5'-trimethylmyricetin	329294	327968	399841	410971	266797	262010	147454	142649	277573	278698	302355	303013	366155	373292	420295	424739	424248	416015	243320	239302	234958	219585	252357	261733	168348	172547	287225	285698	195609	197285	502527	509274	378172	387244	403643	399331	203256	192852	205659	199414	212982	211769	219940	220381	351356	351239	240910	230373
CPD-14951	7,4'-dimethylkaempferol	1	1	1	1	1	1	1	1	48648.5	1	1	56090	1	1	1	43905	1	1	44372.8	43212.9	63712.4	66200.2	31124	30958.4	1	1	1	1	1	1	1	1	1	1	1	1	1	1	1	1	1	1	1	1	1	1	1	1
CPD-14952	3,4'-dimethylkaempferol	1	1	1	1	1	1	1	1	48648.5	1	1	56090	1	1	1	43905	1	1	44372.8	43212.9	63712.4	66200.2	31124	30958.4	1	1	1	1	1	1	1	1	1	1	1	1	1	1	1	1	1	1	1	1	1	1	1	1
CPD-14963	C-13<sup>2</sup>-carboxypyropheophorbide <i>a</i>	90951.6	85853.5	87048.9	86262.6	91122.4	92358.1	79618.6	84282.6	93752.5	96146	99242.5	92383.2	95097.2	88897.8	89401.6	103671	78563.1	89996.9	92363.7	91149.5	100928	99183.1	44906.5	99489.2	79066.1	84880.5	84634.1	80403.1	65273.4	67025.5	95850.7	86572.2	83211.4	81684.2	93781.1	84445.6	1	1	1	1	1	1	1	1	1	1	1	1
CPD-15004	(3E)-phytochromobilin	1	1	1	1	1	1	1	1	1	1	1	1	1	1	1	1	1	1	1	1	1	1	1	1	1	1	10738.4	1	16476.2	17646.1	1	1	1	1	1	1	1	1	1	1	1	1	1	1	124251	116310	104942	99474.8
CPD-15005	cyanidin 3,7-di-<i>O</i>-&beta;-D-glucoside	3.25983e+06	3.31203e+06	1.70184e+06	1.76876e+06	921418	949949	590422	605980	2594936	2.33578e+06	1.78634e+06	1.74985e+06	2.15593e+06	2.18004e+06	2.83184e+06	2.76875e+06	2323002	2.21016e+06	1.85414e+06	1.82096e+06	1.94858e+06	1.94176e+06	1.75039e+06	1.74493e+06	727055	650475	567007	577823	1	1	2.62494e+06	2.63051e+06	2.70314e+06	2.79618e+06	1.85905e+06	1.82309e+06	1.28981e+06	1.27569e+06	1.79732e+06	1.77764e+06	1867021	1.76724e+06	1.06346e+06	1.05205e+06	2048291	2.00892e+06	3105568	3096655
CPD-15006	1-<i>O</i>-vanilloyl-&beta;-D-glucose	83698.5	84252.6	104643	100461	73420.1	71157.5	49946.8	48844.1	80611.1	83061.1	126893	130484	90664.4	86202.2	126573	104903	85548.1	78602.6	77360.2	69982.9	89452.5	87945.6	75044.2	83367.8	65678.6	69697.9	122354	108232	94367.4	91482.2	10618.8	76653.5	106252	101104	71864.1	74487.3	48092.1	42052.9	43191.3	41618.1	36328.3	43078.9	21523.3	21927.8	132403	12101.4	200476	201901
CPD-15056	(2Z)-2-aminobut-2-enoate	55348.1	66527.7	49300.4	43643.5	23411.1	11626.6	1	1	1	1	1	1	16975.1	1	22803.4	17357.8	18171.4	1	1	1	1	1	1	1	1	1	1	1	1	1	16014.2	10779.4	1	1	1	1	1	1	1	1	1	1	1	1	1	1	1	1
CPD-15073	(<i>E</i>)-6'-hydroxyferulate	278162	104111	98083.4	86893.7	204231	132140	1	1	1	71883	87131.4	1	104548	109104	145764	165380	138670	97507.5	1	81584.8	1	25764.9	119632	1	35323.1	136303	108566	69980	174864	156129	89951.5	90624.4	119946	100830	52834.9	47099.5	153619	152184	171761	190410	99256.6	95529.8	60302.7	54893	1	1	1	1
CPD-15074	2-hydroxynaringenin	1	1	1	1	1	1	1	1	1	1	1	1	1	1	1	1	1	1	1	1	1	1	1	1	1	1	1	1	1	1	1	1	1	1	1	1	1	1	1	1	1	1	1	1	11332.9	11145.1	18567.1	17037.5
CPD-15076	(<i>Z</i>)-6'-hydroxyferulate	278162	104111	98083.4	86893.7	204231	132140	1	1	1	71883	87131.4	1	104548	109104	145764	165380	138670	97507.5	1	81584.8	1	25764.9	119632	1	35323.1	136303	108566	69980	174864	156129	89951.5	90624.4	119946	100830	52834.9	47099.5	153619	152184	171761	190410	99256.6	95529.8	60302.7	54893	1	1	1	1
CPD-15077	1-(3,4-dihydroxyphenyl)-3-(2,4,6-trihydroxyphenyl)propane-1,3-dione	258374	262422	128368	130970	63052.1	68034.1	31251.1	33737.5	183918	168264	129597	120592	158531	166828	216977	222361	172887	166923	134088	128006	139871	139471	116140	117311	52778.2	1	40322.6	38000.8	1	1	208298	211269	205762	218422	135202	140088	91147.5	89740.9	133318	129014	138414	133908	78452.2	71919.5	156330	157705	248871	256827
CPD-15078	1-phenyl-3-(2,4,6-trihydroxyphenyl)propane-1,3-dione	107480	101635	40245.1	29710.2	65539.6	61541.8	64880	58605.1	28332.8	26453.5	14276.1	15361.3	40862.8	43617.1	31957.5	20344.7	26841.3	25250.6	32217.9	31667.2	41605.6	44122.4	29482.8	31624.9	38792.5	34700.6	17770.4	15420.4	38398.8	38922.3	23744.1	22895.2	39048.4	38796.8	37743.1	47054.4	22367.3	44889.7	35570	17268	1	1	66334	62702	48776.4	42729.6	11513.8	18260.4
CPD-15154	5-<i>S</i>-cysteinyldopa	1	1	1	1	1	1	1	1	1	1	1	1	1	1	1	1	1	1	1	1	1	1	1	1	1	1	79370.5	82980.2	16088.4	15835.4	49354	51795.3	1	1	1	1	17310	22344.7	29685	35673.8	90677.4	92629.9	10461.2	23179.5	68296.8	78923.1	187033	193138
CPD-15172	6,7-dehydrobaicalein	126627	122346	130975	103098	136360	126322	189465	197617	291354	205535	48578.4	200256	117796	125757	112622	107184	104124	95152.2	325235	262836	362042	335662	190278	246349	105231	86226.3	89227.6	89797.9	146080	103345	94698.9	101342	115743	105070	107382	102611	1	1	1	1	1	1	1	1	1	1	1	1
CPD-15283	1-<i>O</i>-4-hydroxybenzoyl-&beta;-<i>D</i>-glucose	28538.6	60098.9	68375.9	69310.8	11402.6	64952.3	35274.7	54024.6	54892.7	51227.7	80678.6	81233	63399.8	10882.8	69191.1	68385.2	53413.5	52074.1	62338.2	66281.9	83062.8	75517.9	55586.1	65283.6	51834.9	54751.2	84598.4	76640.4	60321.4	63153.1	56447.8	51632	60203.1	69455.1	44120.4	46487.9	161672	160013	131458	128228	86161.8	87401.7	137285	129971	98074.1	106754	83285.8	90329.1
CPD-15373	<i>aldehydo</i>-D-mannose	820412	878758	1.25882e+06	1.22293e+06	310300	65275.3	47496.3	26202.3	2134499	985698	107029	907661	1.14597e+06	639575	1.17112e+06	1.20168e+06	1.01073e+06	987522	296172	249093	268654	180608	132094	186752	81539	127229	1	133984	132312	119542	407991	519398	388860	31467.5	350478	353424	1167135	1.00522e+06	1.04997e+06	961638	1099263	1.07598e+06	1.39765e+06	1.39441e+06	1.36252e+06	1.41268e+06	1.58136e+06	1.51725e+06
CPD-15382	<i>keto</i>-D-fructose	820412	878758	1.25882e+06	1.22293e+06	310300	65275.3	47496.3	26202.3	2134499	985698	107029	907661	1.14597e+06	639575	1.17112e+06	1.20168e+06	1.01073e+06	987522	296172	249093	268654	180608	132094	186752	81539	127229	1	133984	132312	119542	407991	519398	388860	31467.5	350478	353424	1167135	1.00522e+06	1.04997e+06	961638	1099263	1.07598e+06	1.39765e+06	1.39441e+06	1.36252e+06	1.41268e+06	1.58136e+06	1.51725e+06
CPD-15449	(20<i>S</i>)-protopanaxadiol	2.26409e+06	2.3771e+06	3.88769e+06	4.15392e+06	3.79968e+06	3.21325e+06	3.16721e+06	3.24131e+06	3862838	4159232	5708954	5268769	4.58806e+06	3.38197e+06	3982189	4.08525e+06	4.62267e+06	4.84931e+06	2.5851e+06	3.3752e+06	5069307	10266.4	4908269	4829645	2356281	3974018	11989.9	19043.1	7.19392e+06	7.37896e+06	12708.8	2.62151e+06	12910.5	5753329	5.34663e+06	5117894	4.06744e+06	104039	94243.4	95253.4	77627.6	85666.1	12322.4	4.36907e+06	12169.8	5648712	5717684	12298.1
CPD-15477	salvigenin	1	1	1	1	1	1	1	1	1	1	1	1	1	1	10369.1	1	1	1	1	1	1	1	1	1	17546.9	15641.1	1	1	10482.8	1	1	1	16382.3	1	1	1	1	1	1	1	1	1	1	1	1	1	1	1
CPD-15486	genkwanin	1	1	1	1	1	1	1	1	1	1	1	1	1	1	1	1	1	1	1	1	1	1	1	1	1	1	11413.7	17915.6	1	1	1	1	1	1	1	1	1	1	1	1	1	1	1	1	1	1	1	1
CPD-15544	<i>N</i><sup>7</sup>-methylguanosine	425598	406758	223929	242887	384642	381901	247151	252558	361421	369077	514106	518493	189250	406080	249976	225736	437439	214983	351683	348051	383800	394413	361970	384177	453708	447551	651489	609018	521125	511175	218383	223308	426191	420122	335878	326514	815256	823357	828324	813877	895616	884945	929472	933107	1.02456e+06	1022968	826241	824658
CPD-15590	<i>aldehydo</i>-D-galactose	820412	878758	1.25882e+06	1.22293e+06	310300	65275.3	47496.3	26202.3	2134499	985698	107029	907661	1.14597e+06	639575	1.17112e+06	1.20168e+06	1.01073e+06	987522	296172	249093	268654	180608	132094	186752	81539	127229	1	133984	132312	119542	407991	519398	388860	31467.5	350478	353424	1167135	1.00522e+06	1.04997e+06	961638	1099263	1.07598e+06	1.39765e+06	1.39441e+06	1.36252e+06	1.41268e+06	1.58136e+06	1.51725e+06
CPD-15631	apigenin-7,4'-dimethyl ether	1	1	10490.5	16262.9	1	1	1	1	1	1	15694.5	1	1	1	1	27550.8	1	1	1	1	1	1	1	1	1	1	1	1	1	1	1	1	1	1	1	1	1	1	1	1	23315	22533.7	1	1	1	1	50188.6	51179.1
CPD-15632	ladanein	1	1	1	1	1	1	1	1	48648.5	1	1	56090	1	1	1	43905	1	1	44372.8	43212.9	63712.4	66200.2	31124	30958.4	1	1	1	1	1	1	1	1	1	1	1	1	1	1	1	1	1	1	1	1	1	1	1	1
CPD-15634	carthamidin-7-methyl ether	1	1	1	23485.4	1	1	1	1	11901.2	16276.6	39505.7	33277.4	1	17200	18163.2	19417.2	16460.1	23468.5	23802	16516.3	18102.7	16747.9	11291	1	1	1	1	40433	27989.9	27156.3	13432.2	1	23656.5	17542.4	11153.6	10561.5	1	1	10588	1	13450.7	25649.7	1	1	10884.6	10850.6	18468.8	18831.7
CPD-15717	&beta;-maltose	3.79855e+06	3.89671e+06	6.29003e+06	6348743	4510986	3203974	2.13641e+06	2081430	4.56674e+06	4.4734e+06	4656413	4.70147e+06	5978054	6.17592e+06	6.34453e+06	6313536	4678329	5139589	3999598	3.95627e+06	3.83738e+06	3.80978e+06	4.20472e+06	3155300	2119866	2.11965e+06	3339953	4236087	3.14773e+06	3.16675e+06	7.44817e+06	7350209	5922449	5.89751e+06	6343942	4.60071e+06	10680722	10655959	10226054	10455715	11135567	10932998	16862422	16917802	22956946	23311250	16393775	16529612
CPD-15741	(<i>S</i>)-laudanosine	1	1	35608.3	33059.9	19118.8	26512.6	33667.7	33154.8	37532.4	25984.2	1	1	14496.3	17401.1	56266.5	51560.3	23537.3	29876.6	39189.7	39605.6	39161.5	39890.3	20138.8	14702.1	127536	133073	64283.9	67472.8	52360.2	52587.8	20309.6	19063.9	23041.5	16218.4	24047.9	24037.5	1	17450.8	11714.4	11741.4	1	1	28080.9	37494.4	31417.8	21722.9	17657.9	1
CPD-15742	papaverine	1.28407e+06	1.27026e+06	1.58129e+06	1.60558e+06	992694	940186	415918	419634	1.0766e+06	999918	1.62449e+06	1.5949e+06	1.31259e+06	1.28217e+06	1.32217e+06	1.29364e+06	1.30686e+06	1.28679e+06	1.05858e+06	1.13685e+06	1.22128e+06	1.24697e+06	1.11838e+06	1.14562e+06	849337	816240	1.90931e+06	1.90385e+06	1.38816e+06	1.34527e+06	1.40303e+06	1.42581e+06	1.21029e+06	1.26904e+06	1.11869e+06	1.12283e+06	1.14326e+06	1.08224e+06	1.34684e+06	1.30154e+06	1.64677e+06	1.58219e+06	977970	1.01695e+06	1.3485e+06	1.29587e+06	1.83383e+06	1.83573e+06
CPD-15798	(S)-tetrahydropapaverine	1	11224.1	18219.5	19830.7	12573.8	11103.8	1	1	21615.1	20704.4	29085.8	25300.2	17512.4	18951.7	12345.7	12045	20134.9	13702.3	14286	13267.6	21680.9	28826	21357.5	20947.9	1	1	29264	29852.8	27736.9	29282.5	12200.5	19956.6	28787.1	27175.5	27441	19346.4	16551.4	19537.3	13406.7	17652.4	16653.9	11262.4	19091.8	17121.5	20600.4	21377.9	20331.7	18475
CPD-15799	(S)-norreticuline	137191	134425	159170	158481	71594.6	72622.1	10407.9	1	98483.1	89575.9	164625	170830	116434	126740	141184	142115	129159	126358	126661	120254	123449	127244	118620	108664	56587.7	1	149203	150643	97514.7	94585.3	139342	1	148631	158258	135694	134798	10696.8	21866.4	24387.9	28792.7	1	38764.3	1	1	24677.9	23602.1	45213.6	48743.7
CPD-15800	dihydropapaverine	159866	27447.7	153704	157122	166686	161040	112930	123029	18574.6	27991.2	166685	170405	136909	16832	147656	164890	150413	155184	169625	153468	17229.4	159309	29034.7	23777.3	16974.9	137320	22149.4	120719	147385	29697.5	151822	51466.6	31474.5	151405	29245.5	24449.8	55748	45882.1	69705.7	75473.4	103265	98445.2	39040.8	40876.2	81631.9	75057.2	98963.1	91786.4
CPD-15801	(S)-norlaudanine	1	42044	1	46200.2	1	1	1	1	23656.2	16438.1	48367.6	1	1	1	34042.6	1	1	1	31024.2	27300.6	32160.3	30854.1	24331.1	23916.8	1	1	10572.7	11188.1	19825	18456.6	1	1	1	1	45801.3	1	11685.1	17686.6	18167.5	18550.1	21968.1	21091.5	12136.6	11494.4	12674.9	46008.2	77758	76534.7
CPD-15834	2,3-dimethyl-6-geranylgeranyl-1,4-benzoquinol	1	1	1	1	1	1	1	1	1	1	1	1	1	1	1	76783.6	1	1	1	1	80366.6	1	81692.9	78554.1	1	1	1	1	1	1	1	1	35161.7	1	23631.8	1	1	1	1	1	41336.1	49084.3	1	1	1	1	1	1
CPD-15836	&alpha;-tocotrienol	1	1	1	1	1	1	1	18001.3	1	1	1	28366.6	25883.5	1	1	1	27119.3	29438.5	1	1	1	1	22784.9	1	1	1	1	1	1	27477.9	1	1	1	21813.8	1	1	1	1	1	1	1	22942.1	1	1	1	1	1	1
CPD-15837	&beta;-tocotrienol	1	1	1	1	1	1	1	1	1	1	1	1	1	1	1	76783.6	1	1	1	1	80366.6	1	81692.9	78554.1	1	1	1	1	1	1	1	1	35161.7	1	23631.8	1	1	1	1	1	41336.1	49084.3	1	1	1	1	1	1
CPD-15838	&gamma;-tocotrienol	1	1	1	1	1	1	1	1	1	1	1	1	1	1	1	76783.6	1	1	1	1	80366.6	1	81692.9	78554.1	1	1	1	1	1	1	1	1	35161.7	1	23631.8	1	1	1	1	1	41336.1	49084.3	1	1	1	1	1	1
CPD-15839	&delta;-tocotrienol	491970	499314	464324	470224	304823	334525	299874	288530	478178	471852	611771	587995	457298	462373	459419	1	531054	504777	432669	467023	475382	506215	447082	460815	484083	505539	632669	651812	588659	1	556987	551470	505114	1	488832	473033	349716	358835	353272	345317	358782	315612	1	352568	428484	394384	442700	429820
CPD-16	phloroglucinol	1.58433e+06	1.47871e+06	1539820	1.43731e+06	1.36219e+06	1.10911e+06	1582196	1.47904e+06	1.42957e+06	1.72691e+06	1	1	1.41517e+06	1.1871e+06	1.0814e+06	1.32145e+06	1.71311e+06	1.32798e+06	1.60975e+06	1.99807e+06	1.64967e+06	1883672	1.55359e+06	1.87312e+06	1.34492e+06	1.09359e+06	1591562	1.75963e+06	1.27126e+06	1.43588e+06	1.52148e+06	1255800	1.27321e+06	1213081	1369624	1.3714e+06	2.17624e+06	1598858	1.56357e+06	1.32605e+06	1.43019e+06	1.65846e+06	2.05802e+06	2.3647e+06	1.9763e+06	2.13341e+06	2.04152e+06	2.24374e+06
CPD-16013	2-iminobutanoate	55348.1	66527.7	49300.4	43643.5	23411.1	11626.6	1	1	1	1	1	1	16975.1	1	22803.4	17357.8	18171.4	1	1	1	1	1	1	1	1	1	1	1	1	1	16014.2	10779.4	1	1	1	1	1	1	1	1	1	1	1	1	1	1	1	1
CPD-16015	2-iminopropanoate	1	1	1	1	1	1.67976e+06	27594.6	11876.7	30724	16207.5	18874.3	11466.5	1	1	1	1	1	1	1	1	179485	16959.4	130110	41171.4	23906.8	1	1	1	1	1	1	1	1	1	1	1	1	1	1	1	1	1	1	1	1	1	1	1
CPD-16497	3-oxo-palmitate	1	1	1	1	1	1	1	1	1	1	1	1	1	1	1	1	1	1	1	1	1	1	1	1	1	1	1	1	1	1	1	1	1	1	1	1	1	1	1	1	1	1	1	1	10502.9	1	191237	103712
CPD-16536	cyanidin 3-<i>O</i>-&beta;-<i>D</i>-(p-coumaroyl)-sambubioside	36801	31075.3	18400.2	17958.2	1	1	1	1	1	1	1	1	1	1	18561.7	19269.4	1	1	1	1	1	1	1	1	1	1	1	1	1	1	1	11462.8	13482.7	19687.6	1	1	40641.5	35973.3	48953.6	51353.8	90837.4	79780.7	42440.6	42087	90884.8	84305.5	97112.2	85078.1
CPD-16559	delphinidin 3-<i>O</i>-rutinoside-7-<i>O</i>-(6-<i>O</i>-(p-hydroxybenzoyl)-glucoside)	10505.2	11889.2	1	1	1	1	14292.4	18273.5	11666.7	1	20445.7	16468.1	13134.1	23709.8	1	1	1	1	1	11120.2	11152	11057.6	1	11470.6	19775.3	21441	11898.4	12124.8	12574.8	19265.8	15201.9	20472	1	1	1	1	1	1	1	1	1	1	1	1	1	1	11224.7	1
CPD-16560	delphinidin 3-<i>O</i>-rutinoside-7-<i>O</i>-(6-<i>O</i>-(4-<i>O</i>-(glucosyl)-oxybenzoyl)-glucoside)	714809	712856	501971	495767	480636	466720	993284	960785	473653	518769	1.00107e+06	859932	855312	810481	1.12559e+06	1.0731e+06	493808	522472	1.23924e+06	1.46384e+06	578351	611998	448783	425485	1	1	273196	260719	731750	765854	827205	779850	630762	649445	370957	350755	666270	682136	561934	557720	211838	233934	1	1	291107	313994	176398	218016
CPD-16603	cyanidin 3-<i>O</i>-glucoside-7-<i>O</i>-(6-<i>O</i>-(4-<i>O</i>-(glucosyl)-oxybenzoyl)-glucoside)	10505.2	11889.2	1	1	1	1	14292.4	18273.5	11666.7	1	20445.7	16468.1	13134.1	23709.8	1	1	1	1	1	11120.2	11152	11057.6	1	11470.6	19775.3	21441	11898.4	12124.8	12574.8	19265.8	15201.9	20472	1	1	1	1	1	1	1	1	1	1	1	1	1	1	11224.7	1
CPD-16683	(+)-secoisolariciresinol monoglucoside	107958	119522	134809	146387	56173.2	58021.9	1	1	1	1	17066.9	24054.2	80924.2	64286.5	72649.2	84050.3	12627	16839.4	1	1	1	1	1	1	1	1	18158.6	19507.7	87678.6	79610.6	53092.6	52400.8	17065.9	12290.2	1	1	1	1	1	1	18428.8	18454.2	1	1	1	1	11976.3	11151.8
CPD-16700	6&alpha;-hydroxy-germacra-1(10),4,11(13)-trien-12-oate	117889	125877	139347	140380	127891	146262	107236	104491	111802	118590	119630	109628	136356	150954	171488	169046	147608	164281	129681	121233	131371	140400	70822.4	107761	224154	193439	85954.4	112603	208970	192521	137450	136241	181861	171689	178849	157144	163476	195413	151198	168351	133303	130160	147309	148566	143397	139074	151247	60064.1
CPD-16701	8&beta;-hydroxy-germacra-1(10),4,11(13)-trien-12-oate	117889	125877	139347	140380	127891	146262	107236	104491	111802	118590	119630	109628	136356	150954	171488	169046	147608	164281	129681	121233	131371	140400	70822.4	107761	224154	193439	85954.4	112603	208970	192521	137450	136241	181861	171689	178849	157144	163476	195413	151198	168351	133303	130160	147309	148566	143397	139074	151247	60064.1
CPD-16765	cirsimaritin	1	1	1	1	1	1	1	1	48648.5	1	1	56090	1	1	1	43905	1	1	44372.8	43212.9	63712.4	66200.2	31124	30958.4	1	1	1	1	1	1	1	1	1	1	1	1	1	1	1	1	1	1	1	1	1	1	1	1
CPD-16781	dihydrochelerythrine	1	1	1	1	1	1	1	1	75195.7	1	1	71860.2	1	1	1	1	1	1	77135.8	63829.2	49643	51628.1	24037.2	34755.4	1	1	1	1	1	1	1	1	1	1	1	1	1	1	1	1	1	1	1	1	1	1	1	1
CPD-16876	2-hydroxy-5-oxoproline	1	674989	1.66136e+06	936681	309585	382973	1	1	132612	318792	1	1	817757	673724	1	1	278710	1	1	144778	328917	350262	273328	121748	375726	502170	1	132458	386437	1	344710	1	1	1	281516	628792	618285	485509	2.25663e+06	319809	552748	161337	659175	2.54718e+06	1	1	1	1
CPD-170	stachyose	1	10704.2	26857.5	22358.3	1	1	1	1	1	1	28997.6	29702.7	11288.6	11990.6	10722.1	11166.3	20307.5	13699.6	1	1	1	10423.6	1	1	1	1	49253.1	49572.7	10996.3	10630.4	18482.7	18951.4	18017.3	19483.8	1	1	13705.7	1	12577.2	1	20197	15819.6	12517.5	12141.8	12306.2	10985.2	44377.2	44968
CPD-17372	1-(18-hydroxyoleoyl)-<i>sn</i>-glycrol 3-phosphate	110363	1	1	1	10418.1	1	32279	31413.3	54579.6	57938.7	36413.5	31843.8	136599	136203	1	116325	1	1	52315.4	52669.2	47503.2	37903.3	57782.7	68461	34457.4	1	10401.3	10831.9	1	26857.7	1	1	1	1	1	1	28059.8	1	12046.1	11485.4	27583.8	18517.6	27110.8	10609.8	25729.2	34185.9	34488	22427.3
CPD-17373	1-[18-hydroxyoeoyl]-2-[18-hydroxy-lioleoyl]-<i>sn</i>-glycerol 3-phosphate	604049	599772	611184	622791	464528	482413	306046	310694	38820.9	30902.2	74358.9	66152.6	553074	577141	610656	608086	563174	531119	49979.9	46462.2	47471.4	47361.6	32905.4	36727.2	403602	18519.5	39964.1	570048	490928	1	60537.7	54701.5	632868	626499	582981	564595	1	402236	27030.6	30026.6	443642	435278	457360	476191	512912	70711	531980	489200
CPD-17375	1-[18-hydroxyoeoyl]-2-[18-hydroxy-linoleoyl]-<i>sn</i>-glycerol	1450319	1.44197e+06	1.32944e+06	1.39219e+06	1.10019e+06	1.03221e+06	907594	929343	1.13318e+06	1.21692e+06	1.90254e+06	1.86708e+06	1.42064e+06	1.26454e+06	1.44417e+06	1.50488e+06	1905525	1.8939e+06	1.15959e+06	1.28246e+06	1430059	1.4357e+06	1.22463e+06	1.24474e+06	1.4823e+06	1.63642e+06	1748125	1.70999e+06	2.85436e+06	2.79413e+06	1.83454e+06	1.77357e+06	1.83233e+06	1.84653e+06	1.56564e+06	1.55713e+06	2.50627e+06	2184546	1.71924e+06	1.65936e+06	1.56913e+06	1.59911e+06	1.75179e+06	1.71561e+06	1.78518e+06	1.75314e+06	1.78068e+06	1717092
CPD-17420	6-hydroxytyphasterol	118822	22714.1	1	1	36699	39989.1	26056.1	22214.9	111428	1	1	66652.2	1	1	1	46645.8	1	1	40925.9	115802	1	1	1	51078.6	1	1	63264.7	57365.4	1	1	1	1	24651.6	61415.1	1	1	1	1	1	1	1	1	1	1	1	1	51136.3	55821.1
CPD-17421	6-hydroxyteasterone	118822	22714.1	1	1	36699	39989.1	26056.1	22214.9	111428	1	1	66652.2	1	1	1	46645.8	1	1	40925.9	115802	1	1	1	51078.6	1	1	63264.7	57365.4	1	1	1	1	24651.6	61415.1	1	1	1	1	1	1	1	1	1	1	1	1	51136.3	55821.1
CPD-17422	3-dehydro-6-hydroxyteasterone	373602	374463	329108	325493	240215	272364	197935	194143	323325	279838	555008	557415	337456	376671	369119	370652	536967	549118	399585	363431	400582	385947	311364	288855	432321	391946	484919	471418	577805	566192	421484	432228	480810	476454	379448	375856	1	380837	1	1	259720	1	386839	429578	420058	394620	377570	417389
CPD-17599	(-)-bursehernin	1	1	217148	229007	91348.7	89870.1	119785	121259	167863	295511	404701	391416	274757	282064	357031	148504	182797	324853	190551	209357	190507	205868	443616	457464	108083	91584.9	249891	246545	1	71529	571578	578972	431696	430913	370102	362195	138848	1	172079	162661	278169	270890	178405	1	331579	332100	600257	614668
CPD-17621	16-hydroxypalmitoyl-CoA	557985	552280	394430	387154	375718	361219	778662	755226	368876	397531	779203	674923	671830	643072	878922	838179	380953	416574	962195	1133508	445837	477046	354951	329588	1.92368e+06	2232737	206806	198173	572776	601183	645652	616255	500914	495094	290182	275644	526952	528757	439134	436537	165619	180378	452552	468428	230370	242431	135001	171591
CPD-17624	&omega;-carboxy-(9<i>Z</i>)-octadec-9-enoyl-CoA	308171	177694	213822	205219	203202	192619	426727	415616	196133	213565	434783	376364	374209	354477	483211	459899	204748	158171	529786	627358	244883	266409	195638	177352	1.04723e+06	1.21926e+06	104273	98390.3	291476	337654	355125	226871	277856	223951	154087	148272	286480	291351	233836	241157	83450.6	88025.1	106938	255858	118483	122402	58954	84538
CPD-17627	10,16-dihydroxypalmitoyl-CoA	557985	521964	394430	387154	375718	361219	778662	755226	368876	397531	779203	674923	671830	643072	878922	838179	380953	416574	962195	1133508	445837	477046	354951	329588	1.92368e+06	2232737	206806	198173	572776	601183	645652	616255	500914	410883	290182	275644	526952	528757	439134	436537	165619	180378	452552	468428	230370	242431	135001	171591
CPD-17637	7-hydroxylaurate	56888.4	53053.5	113399	124029	11031.9	11534.8	1	1	88504.8	97265.6	118348	150914	78959.9	94952.1	148805	140526	139618	139218	112390	73407.8	198635	209804	15765.5	11336.6	290750	214748	50549.1	56493.8	346894	322773	130241	118361	290922	270723	239464	229705	241321	286564	94932.6	115173	12164.2	1	158008	122535	60540	96828.4	170727	174805
CPD-17640	18-hydroxystearate	572759	569808	77017	20330.8	1	1	66121.1	65703.4	12132.3	83835.1	1	1	247052	247214	62344.5	22905.7	24012.7	20434.5	352311	371052	1	1	1	1	160598	181104	38125.8	31518.7	164219	167535	195978	40388	1	1	1	1	94550.8	89036.4	113503	28116.7	1	1	201416	57628.3	1	1	1	1
CPD-17641	18-hydroxystearoyl-CoA	93208.1	70847.4	1	1	1	1	93127.9	85392.9	1	1	140888	128051	1	1	122002	110619	1	1	113807	143670	1	1	1	1	358061	365583	1	1	1	1	103853	81838.6	1	1	1	1	1	1	1	1	1	1	1	1	1	1	1	1
CPD-17643	1,18-octadecane-diol	20708.1	16736.2	10779.8	11581.6	1	1	1	1	1	1	20286.8	20164	12288	10747.6	11581.8	12158.2	19537	18760.4	11181.7	10380.7	1	10656.6	10598.4	1	17711.4	10574.3	21608.2	19735.7	26896	19742.5	15648.5	17137.2	18739.8	19181.9	16141.1	11125.2	10559.4	12646.1	20195.8	10864.8	18360.9	11459	18641.1	12703.9	17269.9	13005.5	11957.1	18890.7
CPD-17644	(9Z)-octadec-9-ene-1,18-diol	159581	163970	30833.9	24520.5	20023.8	17017.9	17745.2	18449.8	10807.5	27552.2	19668.3	37583.4	32944.5	30902.1	23765	20729.2	24009.4	18757.6	24287.9	11014.7	28204.2	20525.5	23027	26060.4	40142	11114.4	12520.7	14232.3	34446.9	19113.8	156755	11400.2	11695.2	32248.2	27469	36785.5	161334	10967.8	20657	37006	32648.5	22491.2	11798.2	22761.3	11462.3	11512.4	17292.8	25527
CPD-17645	2-(8-hydroxy-2-oxotridecyl)-6-oxopyran-4-olate	25267.3	25174.9	36291.4	36680.5	18980.7	19534.5	1	1	19670.2	18127.6	36149.2	40281.9	19165.7	24288.9	27750.4	28989.6	26598.1	26733	22482.6	17641.7	12481	14275.7	1	11339.2	1	1	32160	33779.8	12174.4	11929.5	41539.8	42141	28407.2	38100.2	25603.6	27108.2	1	1	18378.5	12051.6	10557.4	10852.2	1	1	73638.1	81071.6	132972	27215
CPD-17646	2-(2,8-dihydroxytridecyl)-6-oxopyran-4-olate	159866	149851	153704	10891	166686	161040	112930	123029	166047	153480	166685	170405	136909	11553.6	17029.7	18724.5	11418	155184	169625	153468	118394	159309	165818	163709	158769	137320	148068	120719	147385	154512	19794.2	20969.7	11802.5	151405	148368	146162	12698.6	12538.3	12492.1	16868	22644.9	16304.1	140091	119872	110490	11672.4	96342.1	114621
CPD-17652	4'-hydroxyechinenone	726490	708757	895727	920372	289877	270873	413629	404317	306871	323339	892967	954956	537034	498117	724901	748115	668703	621946	120177	511762	591066	601929	393940	106010	92828.8	824712	736527	714534	437317	505753	530482	539587	1.19377e+06	1163736	657356	653399	80629.3	82799.2	77670.1	609636	81428.1	86252.8	95961.9	109253	141074	136675	1	317151
CPD-17696	&alpha;-tomatine	369880960	365762112	372679680	371442944	355844576	355765152	163730480	160979392	280375456	281862944	331812416	331416352	330863712	327674208	351957408	349091680	315572608	314624736	276801728	288126528	280040896	280962048	292424736	292666144	283354112	285272832	405400352	406182368	355712448	355605216	333687424	330094080	349031712	351556320	289042464	288159648	332370784	331773376	350477696	350281184	389371456	388980896	346746368	346873216	478681280	73468440	492591776	488214240
CPD-17697	tomatidine	94590256	92808472	94937952	93133656	91091504	91799168	47611092	47734056	75231280	74213200	86769280	86177712	82591352	84759720	89981400	90515776	84435600	81602640	75998560	72054264	75849192	77328280	79714680	77916192	78507080	76061680	100523384	99426440	91938056	90923096	88373288	86352280	90370776	91460992	74775000	75236992	81028344	83756120	80144592	81747112	90440320	87150808	20439266	88959384	113536976	112029824	115557376	118963968
CPD-1777	coniferin	58295.6	843846	60557.9	840394	884474	887948	1	1	1	1	1	1	884722	850326	805300	813091	795397	54198.4	56711.6	1	1	1	1	1	870829	896054	492313	1	886842	877009	879743	847433	867542	842774	843940	831776	706583	733616	72178.1	81432.1	409497	10518.9	785207	797173	49276.3	757395	759246	47892.7
CPD-178	D-<i>myo</i>-inositol (3,4,5,6)-tetrakisphosphate	83442.2	87659.1	81310.8	87055.7	59170.5	54285.2	58768.1	62045.2	71961.3	75176.6	122689	118960	88128.1	76985.1	82602.9	85555.8	122813	124341	78476.3	80965.2	86517	85339.7	79114.6	75905	87222.7	90134.7	96633.6	101175	151234	147384	101978	95402.3	109836	109259	94768.7	96458.2	146318	114554	112591	105149	100062	96270.5	105894	103105	110603	104020	107639	107492
CPD-18085	1,2-dihydro-&beta;-NADP	53457.7	50874.3	45002.2	41896.3	31990	36162	22327.6	23102.1	43534.7	43438.4	92025.3	97380.6	49523.7	45998.2	69507.7	55651.5	103420	87369.3	52093.8	44511.9	59022.9	68636.6	42425.4	43723.7	71858.8	61444.4	72511.2	69980.8	134776	136136	71209.6	77355.2	83935.7	70246.7	63210.9	63737.6	46102	79421.1	33453.6	33270.6	38739	31278.1	64790.6	81373.2	70815.3	51849.7	49309.6	45515.9
CPD-182	4-methylumbelliferone	742117	743874	191644	186579	504591	175586	174094	154695	392186	350178	185959	172462	187617	188868	174734	287244	181957	172853	276793	176507	196126	193811	194365	187265	176593	177759	183406	168657	232405	1	166323	1	168650	177481	217767	183956	198836	187122	191970	209918	194797	197819	198693	186104	183597	437456	1	197422
CPD-18262	geranyl &beta;-<i>D</i>-glucopyranoside	43696.2	17938.9	76220.7	74508.8	16787.2	29078	18092.8	18404.7	29836.4	31185.3	14132.1	21615.9	19999	19750.6	21892.1	26658.3	21208.6	20428.7	11250.1	20519.2	18594.2	18610.6	32340.7	30053.9	20626.6	25629.8	55948.9	54142.6	37313.1	43033.4	22824	1	48774.5	47275.2	30414.8	24938.8	20659.8	38949.3	36302.8	32292	13232.4	49206.8	39386.7	82947.8	13406.3	24130.2	20589.2	1
CPD-183	gallate	415304	511107	596115	515733	546388	1	1	1	465411	1	412070	415892	495099	516508	1	530413	1	400639	1	406350	1	395924	1	536570	521586	447440	1	474417	1	436368	503622	425632	425474	537529	1	417169	415955	367202	363287	298541	414133	375948	1	1	460627	440329	486150	380443
CPD-18575	noraucuparin	228434	233280	250656	260228	236947	277787	121184	153312	131324	297386	199434	137458	253429	282275	294431	294483	262258	278985	237742	220037	231068	119795	102613	192251	377624	323268	185415	229792	371064	320551	237405	248189	327969	297643	309823	258348	191481	235799	216479	242880	184793	167284	215482	191538	180309	182934	171056	145808
CPD-1862	desulfoglucobrassicin	138384	133883	1	16112.5	1	1	1	1	1	1	23315.1	1	28764.5	23469	147139	136406	195228	178181	11390.8	11841.9	23817.4	25039.1	17588.2	12148.2	1	1	1	1	1	1	240326	246938	113863	154775	43144.3	34204.8	1	1	16009.5	1	47144.4	19288.2	47090.1	35281.7	249648	242779	394899	387615
CPD-18639	&beta;1-tomatine	3.31856e+06	3.26427e+06	3.55825e+06	3.54053e+06	4275668	4.79688e+06	657295	655444	1992324	1.89111e+06	2.18851e+06	2.08494e+06	2.71915e+06	2.91198e+06	3.35908e+06	3.31147e+06	2.91654e+06	2.8738e+06	1.72013e+06	1.61191e+06	1.54558e+06	1.53785e+06	1.90702e+06	1.77065e+06	1.6234e+06	1.42278e+06	2.94146e+06	2.88175e+06	2.3439e+06	2.31138e+06	2.70788e+06	2.71376e+06	2.65704e+06	2645386	1.98256e+06	1.9579e+06	1.44234e+06	1.69065e+06	1.30784e+06	1.50825e+06	1.84053e+06	1.83469e+06	1.89281e+06	1.77631e+06	2.98631e+06	3.14805e+06	3.21278e+06	3.50472e+06
CPD-18640	&gamma;-tomatine	1.22004e+06	1.4674e+06	1059031	1137786	1.96132e+06	1.91884e+06	721292	759212	1.29297e+06	1.21874e+06	1.46848e+06	1.4284e+06	966063	1.00853e+06	1.14022e+06	1.15557e+06	2.53927e+06	2.58498e+06	1.29508e+06	1.29076e+06	1.78705e+06	1.74916e+06	1.30623e+06	996829	1.16415e+06	1.60077e+06	1540509	808262	1.3861e+06	1.47887e+06	2.22743e+06	2.22856e+06	1442213	1.41911e+06	1.19661e+06	1.22545e+06	1.56152e+06	1.58332e+06	1453222	1.50271e+06	1.73952e+06	1.72308e+06	1.70644e+06	1.69311e+06	2.40909e+06	2398464	2.37073e+06	2.54861e+06
CPD-18641	tomatidine galactoside	331270816	328267168	335045504	330096832	323220320	325368064	177801888	177971184	277767072	269344640	309170144	313839456	291582144	307190944	317058528	317926400	297506240	290138144	275801728	265641280	277247712	282304576	286636320	281213760	276160224	262966336	357588832	354348640	315613600	318178336	308068288	305131136	315972448	320563200	265431104	267713808	285135392	296550112	276922240	289167904	72127112	313834752	314015648	308200192	95593400	95842448	412453088	112586304
CPD-18644	26-amino-furostanol	652839	621788	1.22556e+06	1.2236e+06	1.32678e+06	1.31813e+06	152745	159569	343262	312818	492305	458190	252977	613460	864638	891605	1.37158e+06	1.30954e+06	319565	293436	303724	298537	488002	424347	298358	273240	502574	962458	639145	609680	775945	740812	647901	635595	478218	515049	327066	291398	398467	403179	475486	453195	338738	316012	980359	994577	1.02392e+06	1.03511e+06
CPD-18645	furostanol-26-aldehyde	389683	394354	447536	451443	207278	219210	29747.8	30389.2	1	1	422152	336821	246620	265718	273129	270015	398427	363450	1	1	304552	291765	1	1	304594	305561	366196	1	272688	269013	201792	188553	351682	330835	1	274576	48739.3	1	36716.7	1	120400	1	1	50455.5	306052	32420.5	1	98079.8
CPD-18646	furostanol-26-alcohol	1	172287	153655	154940	114653	126520	111127	119782	172395	11188.4	239993	35344.5	14429.1	171859	169291	173397	243520	239266	13650.8	18131.1	212006	216094	156881	157387	29686.5	193251	231915	229241	281878	279310	190563	193658	233203	211347	23968.6	20717.9	119254	1	104714	110251	95816.2	103776	186643	209348	208616	174379	165847	144439
CPD-18738	solasodine 3-<i>O</i>-&beta;-<i>D</i>-galactoside	670656	629520	461568	140661328	136520496	141503600	65402968	66753888	113448872	802407	129883216	128400120	633014	547247	120898944	123103696	284098	118847776	109331248	104357760	114736928	632332	697994	116456048	818393	121008256	2.48021e+06	2.2668e+06	1.28943e+06	1.26785e+06	1164485	1194590	125390592	127838336	111327816	110157200	1.21169e+06	1.49041e+06	1.31374e+06	1.48157e+06	1795473	1.57377e+06	1.33718e+06	135177232	1.54865e+06	1.18559e+06	2126707	2.60705e+06
CPD-18755	(-)-5'-demethylyatein	1	1	1	1	1	1	1	1	1	1	1	1	1	1	1	1	1	1	1	1	1	1	1	1	1	1	1	1	1	1	1	1	1	1	1	1	1	1	1	1	1	1	1	1	17640.3	12488.2	64669.2	1
CPD-18761	coniferyl alcohol radical	290735	284932	288209	297505	274151	281732	281724	260893	299550	334652	305194	311645	286050	289890	304791	298071	292761	288898	314861	310151	320497	321424	240139	248093	378028	340449	243098	248442	343689	327957	281230	270175	320545	327086	330962	322786	317947	324581	276847	282150	235840	233511	304182	297878	260612	267343	259972	275520
CPD-18998	propyl acetate	63715	69121.3	65399.9	59455.6	38409.3	39021.7	11268.7	16626.4	81753.6	87641.9	99014.7	106967	49025.3	48673.7	63428	65396.7	88213.1	94501	2.40201e+06	2.40582e+06	2.56422e+06	2.58068e+06	2663136	2849696	18885.1	17918.8	51727.3	47887.4	47421.2	45696.4	84343.3	76792.9	102954	112016	88683.6	90753.6	53237.3	1	55296.7	47007.3	52981.5	1	67669.5	1	67410.6	75251	1	76297.2
CPD-19018	4-(3-methylbutanoyl)sucrose	57152.6	58514.6	14665.6	22035	33751.6	41920.4	1	1	47277.8	37824.7	75106.7	80367.5	52373.8	54145.2	56225.9	62745	56235.6	56034.6	59167.9	48641.9	53016	56509.5	49903.4	46358.9	32855.4	24004.2	10992	11864.7	48639.5	50388.4	61851.8	67367.1	18341.3	12873.3	18662.1	19508.1	29375.7	31521	31945	29104.6	23134	16674	45621.3	51163.5	56458.9	59917.2	11994.3	17666.7
CPD-19019	4-(2-methylbutanoyl)sucrose	57152.6	58514.6	14665.6	22035	33751.6	41920.4	1	1	47277.8	37824.7	75106.7	80367.5	52373.8	54145.2	56225.9	62745	56235.6	56034.6	59167.9	48641.9	53016	56509.5	49903.4	46358.9	32855.4	24004.2	10992	11864.7	48639.5	50388.4	61851.8	67367.1	18341.3	12873.3	18662.1	19508.1	29375.7	31521	31945	29104.6	23134	16674	45621.3	51163.5	56458.9	59917.2	11994.3	17666.7
CPD-19021	4-dodecanoylsucrose	33561964	32052312	32903804	34604100	33642128	34023712	17888008	18429354	27552288	27657572	32056742	31425300	32287260	29503010	31251228	31550340	31799810	30481740	25622968	27731444	28546626	29797878	30765016	30767018	30646182	32925572	40207340	40136288	37688088	38002660	32950530	31303726	32283400	32101412	28380868	28759032	39560472	36889124	44236536	42696360	47121036	45784700	36371848	37780408	47353096	45440032	46557756	43556768
CPD-19026	3-decanoyl-4-(3-methylbutanoyl)sucrose	1	1	26730.1	21180.8	1	1	1	1	43447.9	11687.1	24412	29438.2	19866.4	19270.9	1	1	12651.3	17820.3	35507.5	34376.6	41007.4	36412.9	43886.5	44629.9	31260.7	29389.3	143674	142680	58613.4	53320.3	21795.7	27923	11093.9	13077.5	10211.6	11009	20122.2	19984.2	79088.5	27008.7	28780.2	98037	19937.8	20441.4	196167	191005	307405	326619
CPD-1903	(+)-borneol	22881.3	27368.9	1	737692	390741	392322	489818	1	369287	349998	1.69723e+06	1725079	603808	590614	864893	855153	1.03837e+06	1.04065e+06	973880	945468	1	546951	296107	1	2.51961e+06	2.51714e+06	1.15003e+06	1.14297e+06	780795	784895	893369	870730	411894	429137	1	436615	34683.1	37194.6	560427	582634	1	19934.1	708436	56407.3	459382	463870	404716	418187
CPD-19047	3-dodecanoyl-3',4-di(3-methylbutanoyl)sucrose	3752460	3.7679e+06	5496665	5912949	2449741	2407216	1.9131e+06	1.87949e+06	5932320	5.84747e+06	7911943	7.95695e+06	5517951	5.28239e+06	3.88653e+06	3.81777e+06	5.26427e+06	5016875	6.25902e+06	6035590	6.35592e+06	6530167	6.31128e+06	6312565	7000106	6.61651e+06	12224986	12097242	9314315	9350853	6.37294e+06	6.27433e+06	5181798	5562670	4.70498e+06	4642947	7748659	7834527	8326402	8390272	9442899	9174031	7536945	7.55805e+06	11817922	11767138	14766589	14293795
CPD-19048	3-(2-methylbutanoyl)-3',4-di(3-methylbutanoyl)sucrose	444665	464584	704281	735982	317905	332058	496230	508420	1.2212e+06	1.11826e+06	1.68859e+06	1.69769e+06	674574	693134	374993	375729	611862	614169	1.124e+06	1.10402e+06	1184284	1.20301e+06	682249	1.18086e+06	1682862	1.55766e+06	1.93671e+06	3655223	2628076	2.58494e+06	777529	771485	551389	591789	538052	559442	1.99631e+06	2.09563e+06	2.16206e+06	2.22958e+06	899693	2.71483e+06	1940959	1.96791e+06	4531225	4.46944e+06	7.05223e+06	7422383
CPD-19049	2-acetyl-3-(2-methylbutanoyl)-3',4-di(3-methylbutanoyl)sucrose	5.82174e+06	5903501	8.38589e+06	8209628	3.71807e+06	3802778	4581843	4573354	6484062	10717172	13523523	9292029	8675649	8704180	5.20638e+06	5167600	7809337	7.44107e+06	7143436	7147064	7579537	7.44974e+06	11475102	7.29597e+06	12499734	11909098	12994526	18166432	16058073	11213058	9870372	6.80283e+06	7669766	7.82674e+06	7.28194e+06	7.27161e+06	12541125	12897526	13319446	13009421	14095183	13873851	12393488	12611207	17255744	11628161	20116724	20315142
CPD-1905	(+)-neomenthol	11497.2	28681	38515.7	39550.9	18649	18588.7	29741.5	19877.6	12307.5	32099.5	46344.1	48743.2	43609.1	37286.1	43953.5	30012.1	69005.8	11812.4	1	10712.5	18979.4	38180.2	23329.4	26095.6	35494.4	29682.3	43896.9	58737.2	24965.1	66946.7	68154	66819.4	70496.7	11015.2	55786.8	54052.1	36213.8	38905.8	56504	38262.5	24623.6	18092.9	11133.5	1	17273	16624	34370.6	36123.9
CPD-19050	2-acetyl-3-dodecanoyl-3',4-di(3-methylbutanoyl)sucrose	1.12009e+06	617471	2304815	2354357	998524	1.01669e+06	899134	534235	1671841	1.71043e+06	2.42789e+06	2.38337e+06	2.64696e+06	1.77798e+06	1.05709e+06	1.6238e+06	778172	2.08534e+06	1.93007e+06	1.96494e+06	1.97619e+06	2.00628e+06	2.02651e+06	2.96179e+06	2.43608e+06	2437840	4485659	4.20838e+06	4.98479e+06	3.09833e+06	3.11155e+06	3.06982e+06	1.37036e+06	848293	1.40634e+06	1.9773e+06	4681761	4841095	4.89335e+06	4.88494e+06	5.53295e+06	5542333	4364462	4499359	7440060	7.38383e+06	9475429	9291478
CPD-19054	3-isobutanoyl-3',4-di(3-methylbutanoyl)sucrose	201777	199843	184176	189251	218434	214410	301434	283190	249513	230751	16432.8	16405	218388	219309	191567	204027	199579	189590	216279	232259	228928	237760	237507	251834	218546	211493	216611	65846.3	37420.2	30056.7	200212	201070	201090	205153	203935	205844	36030.7	38291.1	39365.3	40685.9	44257.4	44466.5	37295.3	32112.6	113062	125778	191670	198319
CPD-19055	3-decanoyl-3',4-di(3-methylbutanoyl)sucrose	112286	117630	204949	229378	73202.6	75290.7	56043.2	52690.9	219096	217910	310005	300377	183685	181123	124320	127960	164708	163912	218952	212964	216771	223712	235822	227239	229045	213559	491378	515929	362280	357405	236996	215792	176745	197878	153968	145289	370209	392938	405830	406460	492812	507407	422246	423053	819083	807134	1.22887e+06	1.24753e+06
CPD-19057	2-acetyl-3-decanoyl-3',4-di(3-methylbutanoyl)sucrose	90501.9	94705	147289	96132	36308.1	31703.6	19271.8	13206	165821	106472	165007	158251	161295	166246	96345.4	105607	130560	125351	118666	123874	119860	163634	118754	156752	189194	118121	280954	285021	186079	187034	146554	189432	88988.9	142564	119239	85365.3	339764	368171	235951	237500	295041	299106	271863	252969	474044	450490	629795	638956
CPD-19058	2-acetyl-3-isobutanoyl-3',4-di(3-methylbutanoyl)sucrose	3.05196e+06	141119	210568	212156	1.71315e+06	1.5873e+06	115807	115368	347505	312603	3857155	484460	210781	209198	2.79165e+06	2.83873e+06	177441	175258	354468	344094	340802	340218	316692	310713	460910	397748	968600	958175	706506	670792	220392	244619	169482	193717	158336	148486	497495	589950	597775	615770	698996	727421	543984	550840	1.1295e+06	1.25547e+06	1947214	2.01134e+06
CPD-1909	(-)-menthone	22881.3	27368.9	1	737692	390741	392322	489818	1	369287	349998	1.69723e+06	1725079	603808	590614	864893	855153	1.03837e+06	1.04065e+06	973880	945468	1	546951	296107	1	2.51961e+06	2.51714e+06	1.15003e+06	1.14297e+06	780795	784895	893369	870730	411894	429137	1	436615	34683.1	37194.6	560427	582634	1	19934.1	708436	56407.3	459382	463870	404716	418187
CPD-19130	3'-acetyl-3-dodecanoyl-4-(3-methylbutanoyl)sucrose	1	1	1	1	1	1	1	1	1	1	1	1	1	1	1	1	1	1	1	1	1	1	1	1	1	1	1	1	1	1	1	1	1	1	1	1	1	1	1	1	1	1	1	1	1	1	28890.1	27920.1
CPD-19131	3-dodecanoyl-3'-isobutanoyl-4-(3-methylbutanoyl)sucrose	160744	167440	170864	126409	33516.7	52497.5	31194.4	25155.4	129750	121590	197478	190783	121341	106727	94227.5	94392.4	102907	97213.6	135195	128035	137760	138289	133562	127173	158517	152722	345979	357812	302898	308464	147522	142207	93676.1	109030	88552.2	91987.6	282636	298200	300927	306983	351808	356117	294832	306827	613885	598375	931861	921888
CPD-19179	(8<i>S</i>)-3',8-cyclo-7,8-dihydroguanosine 5'-triphosphate	598351	561369	1.00634e+06	979681	1.07547e+06	986261	900407	905413	1.11968e+06	1.15966e+06	1.41049e+06	1.30705e+06	862467	997581	1.19183e+06	1.20981e+06	1.50222e+06	1480030	825307	710789	1.59489e+06	1.61764e+06	1.47112e+06	1.41958e+06	878392	638340	1.82563e+06	1.78874e+06	2742678	2696220	673205	702303	1.53426e+06	1.51892e+06	1.60165e+06	1.61282e+06	849627	958191	1233328	1.2421e+06	1.63411e+06	1.65883e+06	892027	847420	1.46821e+06	1.51698e+06	1.43962e+06	1.46236e+06
CPD-19194	eugenol 2-<i>O</i>-&beta;-<i>D</i>-glucopyranosyl-(1 -> 2)-[<i>O</i>-&beta;-<i>D</i>-xylopyranosyl-(1 -> 6)]-<i>O</i>-&beta;-<i>D</i>-glucopyranoside	1	1	1	1	1	1	1	1	1	1	1	1	1	1	1	1	1	1	1	1	1	1	1	1	1	1	1	1	1	1	189963	193632	174872	192967	138122	142526	1	1	1	1	1	1	1	1	1	1	1	1
CPD-19195	eugenyl-<i>O</i>-&beta;-<i>D</i>-glucopyranoside	1.16545e+06	1.16204e+06	997402	969425	1.06791e+06	1.05543e+06	265054	1066891	768528	732173	582987	579431	920326	974921	817507	822047	843804	829369	746388	749284	680200	696684	765914	768023	842072	826610	574064	558711	588782	596346	845727	825326	978439	984307	1.0025e+06	989845	7966853	7.96623e+06	7.4745e+06	7.67207e+06	8.17206e+06	7988967	13942751	13978418	18344980	18588396	13015216	13148512
CPD-19215	methylsalicylate <i>O</i>-&beta;-<i>D</i>-xylopyranosyl-(1->6)-<i>O</i>-&beta;-<i>D</i>-glucopyranoside	154284	131657	114727	95766	85761.1	87797.7	29369	23208	400853	35796.6	461917	443438	92238.4	88592.9	110217	138043	66689.2	63877.7	413981	403648	601264	620514	567829	568968	17631.9	18969.4	256045	253456	1	11718	11207.2	11867.6	90376.1	84664.8	52557.2	52241.6	29821.2	39830.8	40657.1	56561.8	67085.6	64110.7	93168	34505	477006	481170	1.04337e+06	1.04852e+06
CPD-19216	guaiacol <i>O</i>-&beta;-<i>D</i>-xylopyranosyl-(1->6)-<i>O</i>-&beta;-<i>D</i>-glucopyranoside	17976.9	11265.3	52948.5	53831.9	1	1	1	1	16191.4	1	20295.4	19133.8	1	10822.4	13472	13881.5	17714	18039.3	33624.1	37597.7	46142.8	11943.6	27511.4	29536.3	1	1	37587.6	34765.8	30030.3	28813.5	21412.8	23598.7	18478.8	13542.5	21191.2	20300.2	1	1	1	1	18287	18375.6	1	1	26022.9	26787.7	33615.3	40378.8
CPD-19222	2,2,2,2'-tetra-fluoroacetophenone	862512	847480	684625	708976	39411.6	17113.9	18907.5	25258.4	426798	23016	416235	408471	505108	512264	542454	541829	545913	548992	17483.8	277895	27849.1	37212.8	76238.2	89529.6	51939.8	49980.8	345258	382267	64266.3	258287	507540	499000	395349	19318.6	249835	247176	109458	108769	115546	117505	69715	70388.6	43183.3	47320.9	1	1	1	1
CPD-19719	verdoheme	1	10551.8	1	1	1	1	1	1	1	1	1	1	1	1	1	1	1	1	1	1	1	1	1	1	1	1	1	1	1	1	1	1	1	1	1	1	1	1	1	1	10899.6	10310.7	1	1	11133.3	1	16227.4	11873.2
CPD-19794	brassinolide 22-O-sulfate	1	1	1	1	1	1	24349.8	20031.9	16669.5	1	11080.8	10937.5	1	11085.9	1	1	1	1	1	10884.5	12320.2	11796.1	11198.1	12641.9	10916	1	11289.7	1	11008.4	1	1	1	1	10434.4	1	1	1	1	1	1	1	1	1	1	1	1	1	1
CPD-19811	(+)-7-<i>epi</i>-12-oxojasmonoyl-L-isoleucine	35589	11201.9	46360.9	10489.8	17151.5	23145.1	47140.3	1	1	72693.5	12850	70401.9	17012.9	33139.8	29604.1	37155.1	11382.2	34532.3	71924.7	56281.1	41248	70547.8	32636.5	46215.7	28964.3	16968.8	34151.4	21208	12973.3	17338.6	22368.8	10347.5	18148.1	12003.9	23305.9	17433.7	1	10801.8	1	1	1	1	22055.4	22460.1	10749.5	11423.2	6110.53	28647.3
CPD-19812	(+)-7-<i>epi</i>-12-hydroxy-12-oxojasmonoyl-L-isoleucine	166018	145467	185952	175250	185048	167819	128786	126724	150811	172591	163023	174073	145263	161856	150010	151583	192092	159358	178329	158652	198947	185536	163725	183588	170679	171424	228056	222921	257416	244379	168170	145167	186895	177606	154550	146803	160724	196899	131224	143696	127529	138166	185093	169081	174229	176967	161908	173772
CPD-19813	<i>cis</i>-tuberonic acid glucoside	54880.5	63591.6	63708	57076.5	18115.6	17997.9	1	1	45327.6	23895.4	83287.1	76042.9	55663.7	59451.4	59319.8	60302.8	75730.2	67257.2	55022.5	59154.7	54598.4	64285	52697.5	60178.1	1	1	89785.7	89210.8	28776.8	28878.9	83224.8	77650	76416	69109.5	65096.3	66022.4	32894.7	25491.5	48124.1	49766.8	66564.9	70848.2	50326.4	38682.1	18348	11208	134428	134679
CPD-19817	(+)-7-<i>epi</i>-jasmonoyl-L-phenylalanine	28203.7	27464.1	27443.7	34417.3	1	1	1	1	1	10841.3	19861.9	19246.2	26470.4	19303.2	37553.2	35711.3	21611	25156.6	16297.2	11587.7	11820.5	18271.8	16812.4	17171.3	1	1	27683.1	26497.8	10876.6	11740.6	38869.7	35048.9	30035.3	10489.1	29430.4	27947.8	1	1	1	1	1	1	1	1	1	1	1	1
CPD-19818	(+)-7-<i>epi</i>-12-hydroxyjasmonoyl-L-phenylalanine	19708.5	13746.3	34077	16541.6	1	1	1	1	16883	15967.4	27264.1	27817.7	11508.4	10569.7	1	1	31433	11358.2	58352.2	11410.8	10790.6	10334.1	52903.5	30575.6	83746	73748.1	31789.4	32729.9	125577	128026	20045.7	24524.8	25208.1	29249.7	11009.6	23294.5	34549.5	109474	93341.5	103371	121526	112331	87771.6	90729	181213	178706	284011	278820
CPD-19955	butyl benzoate	48765.6	24989.5	12128.5	16946.4	17720	41797.6	1	11735.1	12283.6	10954.7	55915.2	61385.4	6053.78	10935.2	18464.9	11842.6	47931.1	40175.7	17770.9	23815.2	12453.9	23671.2	26883.5	26900.9	26546.6	26167.6	63560.3	67301	44126.3	28862.7	47616.8	47187.7	30885.4	37792.1	39064.9	37074.3	111871	109837	122655	117326	13840.6	13668.3	78054.3	77339.4	110453	105227	37052.4	111447
CPD-19958	ethyl propanoate	63715	69121.3	65399.9	59455.6	38409.3	39021.7	11268.7	16626.4	81753.6	87641.9	99014.7	106967	49025.3	48673.7	63428	65396.7	88213.1	94501	2.40201e+06	2.40582e+06	2.56422e+06	2.58068e+06	2663136	2849696	18885.1	17918.8	51727.3	47887.4	47421.2	45696.4	84343.3	76792.9	102954	112016	88683.6	90753.6	53237.3	1	55296.7	47007.3	52981.5	1	67669.5	1	67410.6	75251	1	76297.2
CPD-19959	propyl benzoate	175526	67161	190795	193914	352696	80333.3	49950.6	33420.7	2700987	2.33895e+06	121451	2073498	190563	82935.9	124626	147766	192131	186545	107006	119652	112598	109989	103987	112217	77508.5	79194.8	145859	142829	152620	148926	108744	103192	126256	133478	119639	119378	270887	784665	260546	240924	905331	886302	1.25449e+06	245416	263359	260820	1344368	224656
CPD1F-114	<i>all-trans</i>-lycopene	394381	395957	374778	388649	224478	246893	197219	194860	388305	348258	428553	442742	266712	284476	314434	376302	415577	454632	432470	296749	394725	454762	377015	363330	319118	299191	342767	483499	496594	512280	333696	472106	485781	473674	420740	409579	282151	338534	223150	237114	231267	228380	309857	343303	326125	300471	277016	271653
CPD1F-115	&delta;-carotene	394381	395957	374778	388649	224478	246893	197219	194860	388305	348258	428553	442742	266712	284476	314434	376302	415577	454632	432470	296749	394725	454762	377015	363330	319118	299191	342767	483499	496594	512280	333696	472106	485781	473674	420740	409579	282151	338534	223150	237114	231267	228380	309857	343303	326125	300471	277016	271653
CPD1F-118	&alpha;-carotene	394381	395957	374778	388649	224478	246893	197219	194860	388305	348258	428553	442742	266712	284476	314434	376302	415577	454632	432470	296749	394725	454762	377015	363330	319118	299191	342767	483499	496594	512280	333696	472106	485781	473674	420740	409579	282151	338534	223150	237114	231267	228380	309857	343303	326125	300471	277016	271653
CPD1F-119	lutein	1.65329e+06	1634321	1.5e+06	1.53949e+06	670664	1.08059e+06	862467	905834	1.23232e+06	1374555	1.913e+06	1.8349e+06	1.59654e+06	1.47105e+06	1457690	1.29279e+06	1.71396e+06	1.71116e+06	1.466e+06	840604	913230	906883	1034873	916325	1390857	1.61804e+06	837383	845126	1.01731e+06	1.0386e+06	1.66079e+06	1.66665e+06	1.11148e+06	1.16153e+06	1.44481e+06	788419	1.85284e+06	1.64176e+06	1.61087e+06	1.43571e+06	1.5427e+06	1.49285e+06	1.32975e+06	1.30136e+06	1.44865e+06	1.40966e+06	1.62698e+06	1.77376e+06
CPD1F-126	&gamma;-carotene	394381	395957	374778	388649	224478	246893	197219	194860	388305	348258	428553	442742	266712	284476	314434	376302	415577	454632	432470	296749	394725	454762	377015	363330	319118	299191	342767	483499	496594	512280	333696	472106	485781	473674	420740	409579	282151	338534	223150	237114	231267	228380	309857	343303	326125	300471	277016	271653
CPD1F-128	<i>ent</i>-kaurene	1	1	1	1	1	1	1	1	1	1	1	1	1	1	1	1	1	1	1	1	1	1	1	1	45871.1	43276.1	44258.7	41766.8	1	1	1	1	1	1	1	1	1	1	1	1	1	1	1	1	1	1	1	1
CPD1F-129	&beta;-carotene	394381	395957	374778	388649	224478	246893	197219	194860	388305	348258	428553	442742	266712	284476	314434	376302	415577	454632	432470	296749	394725	454762	377015	363330	319118	299191	342767	483499	496594	512280	333696	472106	485781	473674	420740	409579	282151	338534	223150	237114	231267	228380	309857	343303	326125	300471	277016	271653
CPD1F-130	zeaxanthin	1.65329e+06	1634321	1.5e+06	1.53949e+06	670664	1.08059e+06	862467	905834	1.23232e+06	1374555	1.913e+06	1.8349e+06	1.59654e+06	1.47105e+06	1457690	1.29279e+06	1.71396e+06	1.71116e+06	1.466e+06	840604	913230	906883	1034873	916325	1390857	1.61804e+06	837383	845126	1.01731e+06	1.0386e+06	1.66079e+06	1.66665e+06	1.11148e+06	1.16153e+06	1.44481e+06	788419	1.85284e+06	1.64176e+06	1.61087e+06	1.43571e+06	1.5427e+06	1.49285e+06	1.32975e+06	1.30136e+06	1.44865e+06	1.40966e+06	1.62698e+06	1.77376e+06
CPD1F-131	antheraxanthin	887606	868180	954401	870750	591809	480820	241066	224837	646145	673396	1.12584e+06	1.00253e+06	704580	697313	799304	797614	997014	998373	853764	828728	915368	945317	758353	725079	283378	325545	853572	859765	650491	666358	623242	685734	1.136e+06	1.12163e+06	965690	964000	127266	236218	232283	192565	284747	281525	208528	197663	270040	252907	433349	419568
CPD1F-132	<i>ent</i>-kaur-16-en-19-oate	46786.1	37914.8	60889.6	64815.2	44955.3	42023.4	1	1	28256.8	26877.1	63752.5	56490.3	40048.4	48136.6	56471.1	59001.9	51344.3	46416.1	28496.6	19276.3	31824.7	32698.7	38240.1	43218.4	1	1	67119.9	66767.9	35150	36727.9	63832.4	66001.4	57112.9	57882	48829.7	46708	26692.9	29281.1	34806.4	35483	65467.9	62639.1	33791.9	37775.2	88602.6	88991.5	1	1
CPD1F-133	violaxanthin	5032919	4.56583e+06	989891	3795528	2.00056e+06	3.39001e+06	1272602	1248740	3.51322e+06	1.06381e+06	3.90589e+06	1811350	3.51676e+06	1.4084e+06	1.70967e+06	1.16677e+06	788211	778095	4.03011e+06	4143734	1.46372e+06	2.13005e+06	1.81444e+06	1.11618e+06	1.83287e+06	1.05435e+06	3.4956e+06	1.74721e+06	3.07295e+06	3.2269e+06	806004	788199	4.76797e+06	2509569	2964413	1.30617e+06	833654	824014	745050	835478	974369	1.31938e+06	985421	1.35112e+06	1.61775e+06	1.30113e+06	1.30609e+06	1.45336e+06
CPD1F-134	gibberellin A<sub>9</sub>	275988	265515	358713	352985	273451	274323	83655.4	89754.9	366343	366111	420306	415774	283330	281543	287177	306911	392276	389761	354057	363854	346073	382476	328346	337065	234488	238565	436467	418791	439788	445871	315725	313061	389928	402220	360686	362703	591842	577681	598247	581418	514697	509882	582814	573523	630260	629612	534501	528949
CPD1F-135	<i>trans</i>-neoxanthin	5032919	4.56583e+06	989891	3795528	2.00056e+06	3.39001e+06	1272602	1248740	3.51322e+06	1.06381e+06	3.90589e+06	1811350	3.51676e+06	1.4084e+06	1.70967e+06	1.16677e+06	788211	778095	4.03011e+06	4143734	1.46372e+06	2.13005e+06	1.81444e+06	1.11618e+06	1.83287e+06	1.05435e+06	3.4956e+06	1.74721e+06	3.07295e+06	3.2269e+06	806004	788199	4.76797e+06	2509569	2964413	1.30617e+06	833654	824014	745050	835478	974369	1.31938e+06	985421	1.35112e+06	1.61775e+06	1.30113e+06	1.30609e+06	1.45336e+06
CPD1F-136	<i>ent</i>-7&alpha;-hydroxykaur-16-en-19-oate	10703.1	104139	19351.7	18084.5	64544.5	65593	17117.8	22369.2	77582.1	64340.8	17611.8	128432	10915.8	94774.3	16177.2	10404.4	81285.7	80882.3	65955.2	77354.8	88565	82274	97954.6	95002.2	74985.4	60809	24741.3	19806.1	125433	10522.7	16247.8	16363.6	109826	113311	107375	106179	63112.9	65264.5	75221.4	79947.5	104089	108344	50151.3	57541.7	113948	111495	10319.5	168175
CPD1F-137	gibberellin A<sub>4</sub>	23453.2	10823.7	17475.8	11740.3	11101.7	1	1	1	17148	1	35895.3	24417.3	1	1	10814	11117.8	12239.3	1	16995.7	11341.6	17539.5	16845.1	12291	11382.8	1	1	26729.3	19105.6	25393.6	21177.7	11564.2	1	24816.5	19570	12464.9	18163.7	14242.9	12865.6	19180.3	20304.5	12404.6	12450.1	19008.2	12605.1	20108.4	26721	26491.1	23931.4
CPD1F-138	gibberellin A<sub>12</sub>-aldehyde	169026	1	1	1	1	1	36428.9	26754.1	129594	1	201799	196692	138689	1	1	152848	185558	1	1	1	145256	1	1	140444	1	111058	1	1	1	1	1	1	1	1	1	1	1	1	117177	110990	1	1	1	109676	1	1	177530	182676
CPD1F-139	gibberellin A<sub>1</sub>	87680.3	88209.8	107126	100454	59075.9	54946	1	1	1	73385.8	1	1	88521.4	85681.3	82711.6	86660.3	90117.3	84818.8	1	1	1	81959	71936	1	44587.1	36548.3	10863	100348	81118.9	72912.1	87011.6	89990.8	93301.7	93813.8	74955.1	77048.4	29870.9	24567.1	32938.3	33885.3	44140.9	37432.7	24943.4	30402.6	24773.9	19629	26424.3	25867
CPD1F-140	gibberellin A<sub>20</sub>	23453.2	10823.7	17475.8	11740.3	11101.7	1	1	1	17148	1	35895.3	24417.3	1	1	10814	11117.8	12239.3	1	16995.7	11341.6	17539.5	16845.1	12291	11382.8	1	1	26729.3	19105.6	25393.6	21177.7	11564.2	1	24816.5	19570	12464.9	18163.7	14242.9	12865.6	19180.3	20304.5	12404.6	12450.1	19008.2	12605.1	20108.4	26721	26491.1	23931.4
CPD1F-2	(-)-methyl jasmonate	890956	830368	795821	800134	926575	939421	943865	978470	836268	859228	823548	844383	814967	828717	819494	830835	812006	793185	854079	843690	879720	842588	879754	902854	808043	831779	825391	828553	850666	828502	834880	827563	844617	822829	812071	831398	773706	795082	779197	780765	776332	746945	817524	826942	789512	762384	1	738794
CPD1F-4	(3<i>S</i>,5<i>R</i>,6<i>R</i>)-3,5-dihydroxy-6,7-didehydro-5,6-dihydro-12'-apo-&beta;-caroten-12'-al	72447	73058.8	169335	177778	32076.9	32504.6	43281.3	44212.7	39690.4	38374.1	63591	66773.6	59753.8	58894	68802.6	62247.8	67467.1	69615	29131.7	38679.6	54068.7	53448.5	84292.8	90398	56053.1	64441.2	10782.2	134936	94713.7	11744.6	1	12283.7	71969.5	75052.8	67989.2	71321.9	20476.3	22001.1	21801.5	20832.4	33288.4	38231.3	14105.6	20725.5	32518	32933.7	123212	112770
CPD1F-84	gibberellin A<sub>25</sub>	1	1	1	1	1	1	322816	297662	212600	1	1	1	1	1	1	1	1	1	187127	1	189027	1	1	239973	1	1	1	1	1	1	1	1	1	1	1	1	1	1	1	1	1	1	361483	355123	1	384866	1	187630
CPD1F-86	gibberellin A<sub>17</sub>	666538	674376	803697	784211	290258	304866	78953.8	65878.7	328043	330116	507299	493012	630490	661284	808270	833099	691273	716149	296636	291616	281772	153545	222470	138567	147386	141203	471609	475107	285608	265319	707422	687654	575707	283806	464116	221721	181454	184573	209986	227278	286088	276672	170696	173161	360174	337376	420510	420539
CPD1F-95	gibberellin A<sub>12</sub>	265580	259950	304402	297203	169186	169319	80513.3	83550.8	228646	191175	339260	326294	205147	221288	285869	290112	220813	223127	187213	188717	204097	214869	216899	223933	194856	175840	387021	378617	277729	276014	280421	285536	208623	229922	282636	283971	53525.7	53005.3	62462.8	66589.3	84432.9	82484.5	45409.6	45581.8	93481.8	96262.5	158537	160112
CPD1F-96	gibberellin A<sub>19</sub>	1	11224.1	18219.5	19830.7	12573.8	11103.8	1	1	21615.1	20704.4	29085.8	25300.2	17512.4	18951.7	12345.7	12045	20134.9	13702.3	14286	13267.6	21680.9	28826	21357.5	20947.9	1	1	29264	29852.8	27736.9	29282.5	12200.5	19956.6	28787.1	27175.5	27441	19346.4	16551.4	19537.3	13406.7	17652.4	16653.9	11262.4	19091.8	17121.5	49824.6	1	92017.9	98442.8
CPD1F-97	gibberellin A<sub>15</sub> (open lactone form)	95500.4	91252.1	92346.3	102687	40400.2	38271	1	1	49325.2	32016.7	93655.7	89609.8	73986	87943.8	92674.4	92326.8	80125.1	77834.4	54694.3	43875.7	41266.4	43295.1	57179.1	52025	11503	1	76377.3	76604.2	33686.4	28099	121062	126179	87342.8	98533.7	72378.7	72360.4	69924.7	76185.1	94046.8	89332.6	163924	151038	81876.5	77592	145801	139938	296255	309509
CPD-20012	naringenin chalcone	107480	101635	40245.1	29710.2	65539.6	61541.8	64880	58605.1	28332.8	26453.5	14276.1	15361.3	40862.8	43617.1	31957.5	20344.7	26841.3	25250.6	32217.9	31667.2	41605.6	44122.4	29482.8	31624.9	38792.5	34700.6	17770.4	15420.4	38398.8	38922.3	23744.1	22895.2	39048.4	38796.8	37743.1	47054.4	22367.3	44889.7	35570	17268	1	1	66334	62702	48776.4	42729.6	11513.8	18260.4
CPD-20023	3,5-di-<i>C</i>-glucosyl-2,4,4',6-tetrahydroxydibenzoylmethane	276459	294504	267190	278651	246620	231436	464440	436880	255335	279231	737629	686783	293709	288986	252975	287522	296560	282941	338282	374001	252409	260914	256937	264960	429718	454924	253673	256621	281505	273026	349523	334335	258969	249387	260575	239105	286509	263119	297984	284036	288333	312054	288475	287773	227242	232605	258308	277621
CPD-20030	(4<i>S</i>)-perillyl aldehyde	235538	224706	303860	308455	162617	163810	43471.2	39527.3	150928	133831	250703	245955	209033	240354	256128	248541	192105	200189	139571	137622	160596	166856	133010	129243	52024.5	48362.5	157304	156791	106207	106216	275481	267187	203925	211813	182497	194176	279925	273073	274339	273873	350849	350565	569419	550012	1.00087e+06	1.03628e+06	854256	868984
CPD-20260	2-<i>S</i>-cysteinyldopa	1	1	1	1	1	1	1	1	1	1	1	1	1	1	1	1	1	1	1	1	1	1	1	1	1	1	79370.5	82980.2	16088.4	15835.4	49354	51795.3	1	1	1	1	17310	22344.7	29685	35673.8	90677.4	92629.9	10461.2	23179.5	68296.8	78923.1	187033	193138
CPD-204	gibberellin A<sub>8</sub>	159866	27447.7	153704	17879.3	166686	161040	112930	123029	166047	27991.2	166685	170405	136909	16832	147656	10926.2	150413	155184	169625	153468	21878	159309	11225.6	21162.8	16974.9	137320	22149.4	25091.8	147385	154512	23150.1	142418	5881.95	151405	10911.8	146162	115839	127084	59682.3	19802.9	19290.5	85888.1	140091	119872	110490	16580.4	21421.6	10962.6
CPD-21113	felinine	1	1	41412.9	36567	1	1	1	1	1	1	1	1	55039.1	53790.9	98441.1	107979	43134.5	45926.1	26747.1	38693	16872.3	22423.1	1	1	110966	112834	78300.7	75255	1	1	1	1	1	1	1	1	59448.7	60052.4	81380.2	80493.9	33632.5	40628.8	16854.4	24192.2	1	1	1	1
CPD-21114	3-methyl-3-sulfanylbutan-1-ol	277603	282016	176004	166165	141378	137234	57234.6	60194.1	57390.4	51995	52285.4	54044.9	100681	101824	129328	138366	110472	106659	11776.9	65574.6	10352.2	12538.1	1	14712.5	60464.2	53905.9	35256.6	33196.8	26114.9	25473.7	74406.8	77683.2	56337.2	57970.9	47785.7	47152.1	1	1	1	1	1	1	1	1	1	1	1	1
CPD-21322	7&beta;-hydroxythalianol	52561.8	52264.3	47440.9	47993.4	43351.5	39701.9	30313.4	33453.7	55890.4	51598.1	91634.8	85228.1	47515.6	49437.3	51220	50922.8	75680.9	77810.1	50037.8	49832.2	61914.9	62582.8	49718.5	47862.5	60721.9	56132.2	70142.8	72939.3	97559.1	93592.2	54644.8	58967	69669.2	68472.5	63442.5	54918.4	42525.7	47145.7	38325.9	46010	48259.2	47932	55270.7	57930.7	68824.7	62753.4	60687.2	59503.3
CPD-21345	<i>S</i>-(3-methylbutan-3-yl)-L-cysteinylglycine	29782.2	31638	28357.9	23485.4	46873.8	43178.9	21124.8	25810.4	11901.2	16276.6	39505.7	33277.4	5092.96	17200	30212.4	30579.8	22690.8	23468.5	23802	16516.3	18102.7	16747.9	11291	35579.3	44358.1	40959.2	37538.2	40433	27989.9	27156.3	19596.5	26876.3	41727.1	36667.2	16274.7	34161.4	33121.2	37802.6	38194.5	33522	74040.7	68648.2	64713.7	44145.9	71835.4	61814.3	77487	78269.7
CPD-21438	30-hydroxyobtusifoliol	52561.8	52264.3	47440.9	47993.4	43351.5	39701.9	30313.4	33453.7	55890.4	51598.1	91634.8	85228.1	47515.6	49437.3	51220	50922.8	75680.9	77810.1	50037.8	49832.2	61914.9	62582.8	49718.5	47862.5	60721.9	56132.2	70142.8	72939.3	97559.1	93592.2	54644.8	58967	69669.2	68472.5	63442.5	54918.4	42525.7	47145.7	38325.9	46010	48259.2	47932	55270.7	57930.7	68824.7	62753.4	60687.2	59503.3
CPD-21439	30-oxoobtusifoliol	42911.2	42600.5	38439.1	31365.1	28945.2	23728.4	19338	25950.7	34257.3	31080.8	64661.7	1	36423.4	35720.3	37385.9	40183.2	54887.4	55068.1	38588.7	38598.4	47177.5	44558.8	31568.6	26881.4	43107.3	38081.4	52247	51210	1	1	44219.7	44140.6	52260.6	49093.3	38440.2	38678.3	22311.6	34337.8	21955.8	23886.4	29827.6	25294.5	37479.5	47744.7	49459.1	43661.8	45191.4	36913.4
CPD-21592	methylsalicylate-2-<i>O</i>-&beta;-<i>D</i>-glucoside	283920	269102	233048	350126	263128	265546	140273	147143	279299	291618	430259	443329	113086	325600	380933	377551	374793	241616	269344	257029	287591	292049	276283	287303	284429	284184	523756	519669	380585	386033	376175	385977	335451	329217	274475	271830	210530	221556	221010	225413	233792	231391	157654	158791	193300	189557	156111	159644
CPD-21662	inunolide	20899.9	25120.7	21807.5	25103.7	28191.9	30015.7	15943.1	26535	36876.6	32833	34318.2	24671	25118.6	28938.7	32838.1	20839.4	40742.6	25733	35451.5	28604.3	30786.6	42313.7	37629.5	49390.7	108984	1	233070	240696	169335	171159	10531.9	31045.5	1	1	29511.2	24241.6	12214.6	19205.2	115686	52972.9	161525	151662	51859.6	130699	266647	258037	401708	446724
CPD-21663	8-<i>epi</i>-inunolide	20899.9	25120.7	21807.5	25103.7	28191.9	30015.7	15943.1	26535	36876.6	32833	34318.2	24671	25118.6	28938.7	32838.1	20839.4	40742.6	25733	35451.5	28604.3	30786.6	42313.7	37629.5	49390.7	108984	1	233070	240696	169335	171159	10531.9	31045.5	1	1	29511.2	24241.6	12214.6	19205.2	115686	52972.9	161525	151662	51859.6	130699	266647	258037	401708	446724
CPD-21665	8&alpha;-hydroxy-germacra-1(10),4,11(13)-trien-12-oate	117889	125877	139347	140380	127891	146262	107236	104491	111802	118590	119630	109628	136356	150954	171488	169046	147608	164281	129681	121233	131371	140400	70822.4	107761	224154	193439	85954.4	112603	208970	192521	137450	136241	181861	171689	178849	157144	163476	195413	151198	168351	133303	130160	147309	148566	143397	139074	151247	60064.1
CPD-2181	1-oleoyl-2-oleoyl-phosphatidylcholine	2.09715e+06	2.05061e+06	2.2232e+06	2.0794e+06	1.96497e+06	1937538	935563	892538	5.50056e+06	5560461	7758019	7664251	2.21406e+06	2.13515e+06	1574007	1.46525e+06	5662898	5114497	5.91686e+06	5.78996e+06	5924183	6.85043e+06	5554033	5299469	2.7845e+06	2.72199e+06	5985855	1	2.71917e+06	2358879	2.00239e+06	2.31562e+06	6975175	6723093	6.11709e+06	6148025	1.80385e+06	1.93681e+06	2123537	2.06941e+06	1	1	2127410	2.05488e+06	4.13792e+06	4.12262e+06	1	1
CPD-2182	1-linoleoyl-2-linoleoyl-phosphatidylcholine	20850882	20869118	22195764	21616816	18530326	18575938	11197744	11660204	35764432	36906420	49823816	49300828	24355850	23502624	21954236	22144480	41377788	41669748	38254192	39867224	44601320	44764020	39844400	39821916	21777030	22256606	39107960	38434892	18588024	18349394	27201794	27340960	47310204	47149660	41940480	41970728	24242862	22493486	26119524	25938534	21031900	21488652	21964048	21112974	37522608	37524964	28405360	27792806
CPD-2183	1-oleoyl-2-palmitoyl-phosphatidylglycerol	3071213	3011743	3075124	3110655	2.23815e+06	2.24294e+06	1512644	1.65731e+06	2.99893e+06	2.93091e+06	3.6963e+06	4.48249e+06	2902115	2.86325e+06	3.06503e+06	3.04448e+06	4395396	4290553	3320106	3402454	2.71579e+06	2.71995e+06	956732	3.01867e+06	2.64289e+06	2.74667e+06	3.36352e+06	3.36261e+06	3.99377e+06	4060689	3.57016e+06	3.49822e+06	1087894	4243874	3.55856e+06	3.41902e+06	3.46699e+06	3.43824e+06	2.83971e+06	2.8547e+06	2791996	2.7977e+06	3400802	3.48568e+06	3.728e+06	3.63064e+06	3572788	3.55633e+06
CPD-2184	1-oleoyl-2-(3E)-hexadecenoyl-phosphatidylglycerol	613239	655852	1.22702e+06	1.26272e+06	740875	706011	202143	228875	1.58411e+06	853216	1.37847e+06	1.37188e+06	916091	964314	1.11333e+06	952364	1.31845e+06	1211809	1.0916e+06	821877	1.06115e+06	1.23388e+06	856797	837176	305533	319093	1.10117e+06	1.17312e+06	713137	750734	958070	1.01746e+06	1.13094e+06	1.46087e+06	1.18588e+06	997692	1.03237e+06	1.05397e+06	981202	1.16376e+06	1252637	839903	1.30444e+06	1.32107e+06	1.55027e+06	1.48045e+06	1.92561e+06	1.90371e+06
CPD-2185	1-linoleoyl-2-(3E)-hexadecenoyl-phosphatidylglycerol	2.18798e+06	323147	1.96934e+06	576117	903560	697031	420074	451004	329447	569271	1.63728e+06	2.34263e+06	127141	1.99247e+06	321195	329007	453001	287386	447937	1.32547e+06	1086072	559597	544309	1.45833e+06	1.08451e+06	511563	531298	1.1149e+06	1.03793e+06	1.00648e+06	2.34928e+06	2.23312e+06	1.37545e+06	603135	352526	1.22765e+06	1	238550	643912	749474	280591	544962	441886	475666	1	832266	1264955	645550
CPD-2186	1-&alpha;-linolenoyl-2-(3E)-hexadecenoyl-phosphatidylglycerol	5.04817e+06	316864	436125	4711880	1.77127e+06	3058534	1	1	1	4189839	5816479	5832896	4633158	2.72092e+06	4647648	4.69488e+06	1	3.49426e+06	4842795	4749345	4.42576e+06	4574649	4.09871e+06	1	1	992312	2.46742e+06	4.2485e+06	2.92338e+06	1.32567e+06	5331582	5201256	1	1	4.17792e+06	4258523	855179	52741.5	1	1	13341.9	1	2.71846e+06	2726654	3.80871e+06	3.72046e+06	1.95913e+06	3.89933e+06
CPD-2187	1-18:1-2-16:0-monogalactosyldiacylglycerol	4.14179e+06	3.34782e+06	3.3891e+06	4.23175e+06	184835	176286	1.36831e+06	1.37554e+06	2.67499e+06	2.4927e+06	3911750	3.9234e+06	3.08028e+06	3835150	3378074	3.45726e+06	436521	363197	302373	247993	3.1114e+06	318327	192606	201337	325591	306523	338609	340458	479857	494543	4.80278e+06	4462608	314322	353409	3.57795e+06	5.24488e+06	215638	278508	173423	201654	166982	177864	312640	332047	315582	285725	271407	238839
CPD-21877	(-)-arteannuin B	29782.2	31638	1.21362e+06	1.26201e+06	46873.8	1243296	952340	954992	1.00187e+06	1.09596e+06	1.05327e+06	1.02179e+06	1.235e+06	1.3048e+06	41131.4	1.53978e+06	39681.4	30521	1112121	1.0455e+06	1.15929e+06	1259988	735716	940450	2.08951e+06	1.78756e+06	57894.4	131964	1.77556e+06	51938	21709.8	16856.9	27735.5	1.52021e+06	28190	1.43662e+06	27500.6	32733.2	1.43782e+06	27820.4	43954.2	42998.5	53808.6	1.32827e+06	1.21431e+06	1.23683e+06	1.32748e+06	1.2824e+06
CPD-2188	1-18:1-2-16:1-monogalactosyldiacylglycerol	8230053	8408434	7.79981e+06	8093519	7312759	7344842	4967104	5143686	6993877	6438476	5946910	5982396	8.28819e+06	8036750	8109875	8.20987e+06	6524153	6.47654e+06	6.9215e+06	6601711	6376784	6.36219e+06	6.64893e+06	6.71644e+06	5.87904e+06	5837422	6.1817e+06	6.06343e+06	6375206	6.6334e+06	8727438	8412321	6193688	6193737	7.15235e+06	7019677	5081706	4841714	5.1747e+06	5.05601e+06	6.17673e+06	6105539	4.7355e+06	4565522	4.8583e+06	4.96655e+06	6.68412e+06	6.81221e+06
CPD-2189	1-18:2-2-16:2-monogalactosyldiacylglycerol	7.51559e+06	7461102	7365475	7.45576e+06	7.14345e+06	6.6143e+06	5.75489e+06	5524491	4888174	4825961	4871529	4710003	7.62454e+06	6955174	7558961	7.38519e+06	4.5659e+06	4421602	5.06282e+06	5550544	4.88934e+06	4412936	4373536	4.50503e+06	4.48864e+06	5346771	4839790	4.73074e+06	6771986	6.77096e+06	7321992	7064199	4435314	4385514	5013349	4915778	4.56545e+06	3915843	4010146	3.91526e+06	5.16674e+06	5.22538e+06	3.66334e+06	3.68775e+06	2.61582e+06	2.56968e+06	4500512	4.69873e+06
CPD-2190	1-18:3-2-16:3-monogalactosyldiacylglycerol	8123493	8.12972e+06	7533492	7.78689e+06	8547287	8469935	25049074	24908520	9039458	8427398	8320205	8242745	7.99107e+06	8016536	7.80979e+06	7.66155e+06	7392639	7213091	8182716	8741886	8600585	8583415	15079896	8738511	8651897	8040065	7.70921e+06	7.53183e+06	8601924	7.85194e+06	8483469	11457038	8.29509e+06	7539309	7.72383e+06	7.53987e+06	7593677	7157301	7689940	10939425	6556267	7.06074e+06	7.05505e+06	6.99318e+06	6.97824e+06	7023188	6.87352e+06	7260945
CPD-21950	guaiacol <i>O</i>-&beta;-<i>D</i>-glucopyranoside	55330.7	55977.2	36459.2	71784	46873.8	36625.3	21124.8	25810.4	47227.2	47480.1	69539.3	70925.1	35108.8	64355.9	25635.6	42524.8	47466.9	49561	42463.1	43024.5	53875.9	48793	38141.8	45239.9	44353.4	43465.5	85724.6	131964	50786.8	51938	61656.8	56296.9	50532.9	47409.7	44105.6	42074.9	68666.3	38388.9	70073.7	32999.9	87934.4	85969.2	45863.2	72429.4	85993.9	50869.6	45317.8	46428.7
CPD-2202	(6S)-hydroxyhyoscyamine	490906	472923	544348	560721	265200	257810	81728.5	80461.8	352660	300402	589837	577107	434307	445169	482486	492227	458201	443894	432510	414358	427108	436086	363051	359327	211005	192998	503568	502395	341708	317797	515453	507016	526693	549061	475044	465881	128321	135657	100916	96508.4	39533.1	36945.7	125869	126293	604599	610772	1.55756e+06	1.6182e+06
CPD-22130	31-norcycloartanol	47014.5	40165.2	42661.6	38085	27210.4	32513.5	31066.4	30140.5	44943	39880.6	135691	73315.9	42175.9	38842.3	36964.3	42007.3	60661.9	49640.5	37196.6	93965.1	37022.5	46840.1	38064.2	34619.3	98492.9	53311.5	45569.6	49729.6	77861.2	158934	42359.2	49994.6	52455.3	56290.5	43707.1	43858.9	37807	49277.9	37757.7	38660.9	40536	37862.5	56040.1	59062.7	57296.3	1	108376	1
CPD-22131	(3&beta;,9&beta;)-4&alpha;-demethyl-4&alpha;-carboxy-9,19-cyclolanost-3-ol	1.26163e+06	1.27449e+06	1.44157e+06	1.48739e+06	877506	877561	276063	274122	430601	404231	904016	927900	1.0853e+06	1.08473e+06	814088	823549	982452	982901	583362	576552	675649	684085	592732	604352	566711	541756	1.09144e+06	1.10903e+06	1.01615e+06	1.01076e+06	1.31745e+06	1.28757e+06	746786	774373	758844	769517	487392	508419	485096	500018	618835	626792	834220	850960	1.99466e+06	2.0159e+06	1.72078e+06	1.67741e+06
CPD-22132	31-norcycloartanone	5837547	5923613	4994600	5.42111e+06	4433088	4.10876e+06	3750235	3.75575e+06	1970657	2.05403e+06	2.33582e+06	2.21382e+06	5.27964e+06	5076726	5.85629e+06	5898983	3165486	3.04263e+06	2336034	2477227	2.00789e+06	1.96273e+06	2.04733e+06	2.24662e+06	4681766	5009381	2710405	2.82888e+06	6.67711e+06	6.8179e+06	5245811	5.2064e+06	2.25408e+06	2.27716e+06	2402701	2.40152e+06	6.74687e+06	5803498	5805875	5.45444e+06	6732033	7.04691e+06	5240545	5.05397e+06	2.51677e+06	2.62267e+06	5.68447e+06	6.22021e+06
CPD-22136	4&alpha;-carboxy-5&alpha;-cholest-7-en-3&beta;-ol	168461	156856	127316	136435	95372.5	1	82346.8	90014.5	114708	126303	213013	205925	152096	136516	131822	144742	195170	199281	144024	148456	135519	139484	119815	118201	153320	163685	174454	172370	188122	185385	164098	165694	172284	165238	138060	146489	197557	170775	170598	160756	159463	151276	171439	169527	166701	169182	178249	183082
CPD-22137	lathosterone	1	1	37461.2	33256.8	19338.1	20033.6	20158.5	20059.6	23768.6	29386.3	55811	55730	39870.3	32108.7	30045	32812.1	52834	51578.8	29171.6	1	33402.7	34489.8	28460.7	29768.7	30770.9	31823.3	49270.1	48980.8	63874	63944.7	1	1	50378.8	51453.3	43122	35776.3	1	126516	35777.5	37123	38704.7	36268.4	17373.6	42166.3	47649.4	47779.2	46716.8	46560.1
CPD-22265	tomatid-3-one	33196084	32544202	35472444	35779652	35035740	36188844	15796272	16082322	26977528	26844610	31468474	30874742	30689394	30993276	30772846	30854712	31276426	29805692	25763454	24907666	27277160	28438258	28682104	28229026	32779204	31181190	46268932	44781020	39400076	40710444	33881312	33213232	32006380	32701448	28152822	28199822	33709176	34963836	32801538	34968048	39262608	38876204	35315064	34792908	386028	50915924	442666	520550
CPD-22266	tomatid-4-en-3-one	1	1	56258.6	1	192255	194359	1	1	22880.2	16630.1	115945	1	30700.5	35233.3	68355.5	66605	1	1	1	1	50470.8	51042	16563.8	16041.4	118311	114548	11255.5	1	145417	147772	1	1	74652.5	81858.3	60527	30435.4	10553.9	47321.7	1	11070.1	1	10551.5	93569.9	86119.7	68186	70196.6	33127.9	36339.6
CPD-22267	dehydrotomatidine	33196084	32544202	35472444	35779652	35035740	36188844	15796272	16082322	26977528	26844610	31468474	30874742	30689394	30993276	30772846	30854712	31276426	29805692	25763454	24907666	27277160	28438258	28682104	28229026	32779204	31181190	46268932	44781020	39400076	40710444	33881312	33213232	32006380	32701448	28152822	28199822	33709176	34963836	32801538	34968048	39262608	38876204	35315064	34792908	386028	50915924	442666	520550
CPD-22268	solasod-4-en-3-one	1	1	56258.6	1	192255	194359	1	1	22880.2	16630.1	115945	1	30700.5	35233.3	68355.5	66605	1	1	1	1	50470.8	51042	16563.8	16041.4	118311	114548	11255.5	1	145417	147772	1	1	74652.5	81858.3	60527	30435.4	10553.9	47321.7	1	11070.1	1	10551.5	93569.9	86119.7	68186	70196.6	33127.9	36339.6
CPD-22269	solasod-3-one	33196084	32544202	35472444	35779652	35035740	36188844	15796272	16082322	26977528	26844610	31468474	30874742	30689394	30993276	30772846	30854712	31276426	29805692	25763454	24907666	27277160	28438258	28682104	28229026	32779204	31181190	46268932	44781020	39400076	40710444	33881312	33213232	32006380	32701448	28152822	28199822	33709176	34963836	32801538	34968048	39262608	38876204	35315064	34792908	386028	50915924	442666	520550
CPD-22270	soladulcidine	94590256	92808472	94937952	93133656	91091504	91799168	47611092	47734056	75231280	74213200	86769280	86177712	82591352	84759720	89981400	90515776	84435600	81602640	75998560	72054264	75849192	77328280	79714680	77916192	78507080	76061680	100523384	99426440	91938056	90923096	88373288	86352280	90370776	91460992	74775000	75236992	81028344	83756120	80144592	81747112	90440320	87150808	20439266	88959384	113536976	112029824	115557376	118963968
CPD-225	<i>trans</i>-aconitate	1	1	15448.8	17733.8	1	1	1	1	16341.5	22984.9	28816.8	29316.9	13408.7	13727.9	17346.3	23290	18552.4	21256.8	10777.8	1	1	1	1	1	1	1	25733.3	24695.6	1	1	25626.9	22325.7	1	13011.2	1	1	1	1	1	1	1	1	1	1	1	1	1	1
CPD-2281	6<sub>G</sub>,6-kestotetraose	1	10704.2	26857.5	22358.3	1	1	1	1	1	1	28997.6	29702.7	11288.6	11990.6	10722.1	11166.3	20307.5	13699.6	1	1	1	10423.6	1	1	1	1	49253.1	49572.7	10996.3	10630.4	18482.7	18951.4	18017.3	19483.8	1	1	13705.7	1	12577.2	1	20197	15819.6	12517.5	12141.8	12306.2	10985.2	44377.2	44968
CPD-236	gibberellin A<sub>29</sub>	87680.3	88209.8	107126	100454	59075.9	54946	1	1	1	73385.8	1	1	88521.4	85681.3	82711.6	86660.3	90117.3	84818.8	1	1	1	81959	71936	1	44587.1	36548.3	10863	100348	81118.9	72912.1	87011.6	89990.8	93301.7	93813.8	74955.1	77048.4	29870.9	24567.1	32938.3	33885.3	44140.9	37432.7	24943.4	30402.6	24773.9	19629	26424.3	25867
CPD-253	4,5-<i>seco</i>-dopa	542291	518162	532052	555498	477112	520662	182952	169079	258754	292920	353812	359172	517456	557669	578789	597375	505802	475116	327260	308422	350104	351675	292912	355474	247992	256168	387880	428852	384443	351264	520843	495232	484974	439076	441119	406405	368804	381892	385228	417192	436513	431359	315149	302250	331903	335989	356394	351601
CPD-261	(4<i>S</i>)-perillyl alcohol	136888	143313	91020.5	107322	77833.5	64912.3	74177.9	59944.8	87154.5	85983.1	149501	149610	104315	101941	95065.2	101845	171449	150146	92038	104115	98706.9	108639	100075	91725.6	107703	128698	133019	121040	165041	186062	153735	153868	142778	148084	126403	115506	143813	115088	109059	102882	142766	123131	157282	134474	123486	128969	150108	129000
CPD-263	(-)-trans-isopiperitenol	136888	143313	91020.5	107322	77833.5	64912.3	74177.9	59944.8	87154.5	85983.1	149501	149610	104315	101941	95065.2	101845	171449	150146	92038	104115	98706.9	108639	100075	91725.6	107703	128698	133019	121040	165041	186062	153735	153868	142778	148084	126403	115506	143813	115088	109059	102882	142766	123131	157282	134474	123486	128969	150108	129000
CPD-2961	D-gluconate 6-phosphate	34237.5	33511.4	34842	44254.8	33071.7	33230.6	1	1	1	10687.2	23575.6	22266.9	35150	36499.9	43017.4	41107.5	34845	33501.2	11301.8	11056.9	17440.2	21165.5	1	11726.7	1	1	31586	33205.4	24237.9	12043.9	35833.1	33782.4	32897.7	31034.4	31075.3	19384.5	1	1	1	1	1	1	1	1	1	1	1	1
CPD-309	D-octopine	1	1	1	1	1	1	1	1	1	1	1	1	1	1	1	1	1	1	25361.2	26532.4	19979	24428.9	12388.9	11378.7	1	1	1	1	1	1	1	1	1	1	1	1	1	1	1	1	1	1	1	1	1	1	1	1
CPD-334	2,3-dioxo-L-gulonate	103490	95246	92308.1	89988.8	81762.5	50653.6	87821.2	96303.9	108758	97180.4	108374	111168	91780	88619.4	97720.4	90116.5	94587	74804.6	112345	105432	124698	124074	82703.3	69159.8	126730	120099	88153.1	67262.7	97748.2	105586	94789.4	86495.2	101798	112637	100627	115388	75174.1	84434.8	81178.2	95551.7	132692	126396	101262	106383	101431	97392.6	165322	164495
CPD-342	5&alpha;-androstane-3,17-dione	1	1	1	13044.4	1	1	1	1	1	1	1	1	1	11951.2	21763.7	10409	1	12741.9	1	1	1	1	1	1	1	1	23924.2	23084.7	1	1	12976.1	11985.5	1	1	1	1	1	1	1	1	10729.1	1	1	1	22181.2	10885.1	11916.1	16292.8
CPD-352	17&beta;-estradiol	34379.8	42019.8	46975.2	51146.9	45357.7	44452.2	48600.9	49614.7	37208.5	53064.1	45349.8	50526.9	40061.2	36367.5	33480.7	36777.8	37665.8	39821.1	1	44176.6	43387	40315.9	45300.6	44643.3	32277.4	43685.5	41064	48700.1	63801	58146.1	42608.9	49906.7	38239.4	55186.5	51829.3	33349.2	47442.7	41035.8	52006.7	41911.8	1	40032.9	51058.3	39477.6	46733.6	51077.4	1	1
CPD-369	L-iditol	40670.5	44435.6	31365.3	31223.1	36533.6	40790.1	11710.1	18249.8	31766.9	30308.7	24516.5	34252.3	29733.4	25257.1	1	23064	22956.2	1	32030.2	30604	39252.2	41317.3	38480.7	37899.3	15084	1	1	23262.8	30375	23818.4	1	1	1	1	1	1	1	1	1	1	1	1	1	1	1	1	1	1
CPD-3736	lanthionine	11438.6	46525.7	22728.8	10880.5	31360.8	17478.2	34947.8	25056.7	95350.8	11657.4	58350.1	11149.8	98268.8	114119	11054.8	16787.1	109925	127436	41515	108375	19523.9	11116.7	32740.5	38751.3	19300.1	24997	57167.8	51245.3	141975	36512	117844	51522.5	35314.4	10718.3	41566.8	11457.1	76782.7	18334.9	83842.9	16694.5	21940	20008.1	47502	79905.4	106267	115538	1	40731.2
CPD-3740	L-djenkolate	2.09531e+06	910342	2.66068e+06	1.26339e+06	658221	706541	679050	319916	1.7429e+06	851270	2.20175e+06	2.16891e+06	1.04927e+06	1.11028e+06	3297407	1534797	2.59673e+06	1.23224e+06	1.90245e+06	829524	1.27911e+06	1.61502e+06	577523	595524	409395	398243	1.67556e+06	816602	588990	513708	2.6282e+06	2.61385e+06	976926	1.13943e+06	1.01883e+06	2076362	652761	652448	660894	667890	914799	912388	537522	528264	729984	725621	361451	566529
CPD-381	(<i>S</i>)-2-hydroxyglutarate	1	1	1	1	1	11221.8	1	1	1	1	1	1	1	1	1	1	1	1	1	1	1	1	1	10735.2	18148.1	20636	1	1	12090.4	1	1	1	1	1	1	10903.7	1	1	1	1	1	1	1	1	1	1	1	1
CPD-385	1,2-benzoquinone	835743	827437	827414	852999	832376	851069	443617	321372	685532	688807	777812	767539	750232	781411	809752	819796	772647	754568	697580	655588	694700	708807	713118	710716	744837	712287	941192	951644	865509	862955	808605	792282	813814	808855	709391	683087	714833	261136	728734	213320	837983	817754	826495	776335	999156	976567	1.03744e+06	1.06075e+06
CPD-394	<i>N</i>-methylputrescine	23537.1	17541.3	68186.4	19844.2	61731.1	17072	1	1	1	1	1	1	1	1	12719.1	30342.9	1	1	1	1	1	1	1	1	20663.1	61663.8	16649.8	16604.3	1	1	1	1	1	1	1	1	1	1	1	1	1	1	1	1	1	1	1	1
CPD-3943	(22&alpha;)-hydroxy-campesterol	1	1	23270.4	111766	155585	137368	141737	120284	28725.7	105603	84272	50046.3	116218	105515	120934	131451	103350	117172	1	24402.9	108553	24723.7	110595	125374	94568.2	100805	87895.2	36411.8	48800.9	50065.6	1	1	120460	115499	118733	123147	1	1	20456.5	107171	101285	102406	110554	110057	83331.2	1	26109.4	66580.1
CPD-3945	(22&alpha;)-hydroxy-campest-4-en-3-one	1	1	1	1	1	65669.8	53766.5	1	1	1	176159	182981	1	99157.1	64299.4	1	119955	150908	1	107606	1	1	78828.1	1	104129	1	95236.3	106097	173472	154424	103170	98223.8	1	120759	71531.2	1	1	120951	81442	62370.6	1	92936.6	90492.2	118308	130673	133893	1	119067
CPD-3946	(22<i>S</i>,24<i>R</i>)-22-hydroxy-5&alpha;-ergostan-3-one	1	1	23270.4	111766	155585	137368	141737	120284	28725.7	105603	84272	50046.3	116218	105515	120934	131451	103350	117172	1	24402.9	108553	24723.7	110595	125374	94568.2	100805	87895.2	36411.8	48800.9	50065.6	1	1	120460	115499	118733	123147	1	1	20456.5	107171	101285	102406	110554	110057	83331.2	1	26109.4	66580.1
CPD3DJ-11366	sphingosine 1-phosphate	20946	26939.3	18518.7	17111.4	1	1	1	1	12385.5	1	30549.9	35221.2	11227.6	1	12298.2	12865.7	32205.8	20538.3	18580.4	19026.6	13144.6	17794.7	1	1	23839.1	32175.2	18812.6	11905.6	38361	37406.9	19034.8	18238.2	24958.6	27872.6	17723.2	18545.4	33778.6	29024.3	27055	26187.8	22566.9	19357.6	18434.4	19675.8	15021	21420.2	18609.2	18951.9
CPD-400	guaiacol	1	45448.9	65282.8	10366.5	22361.8	19744.2	1	1	25044.7	25851.5	41022.6	61325	23336.8	18078.6	26719.6	28271.8	24721.2	23677.7	17346.2	22893.2	12104.9	30251.4	24272.3	24892	1	1	50858.6	39315.4	11317.3	12219.8	1	1	24455.8	26881.7	11479.9	11323.8	19455	17104.8	25041.6	22979.2	53224.1	60588	152340	1	137512	39138.7	400888	418147
CPD-406	N-methylethanolamine phosphate	29660.2	24768.8	37675.4	41443.8	27526.9	25010.6	15292.5	14142.9	44674.3	51685	68701.7	69054.9	43900.4	41573.2	41923.5	48615.2	61485.2	68979.5	49605.1	45470.1	52800.5	50886.9	48382.9	54621.7	30187.1	35159.7	67944	71103.8	46636.2	43885.8	53429.3	58578.5	55823.3	53610.2	60038.2	61268.7	88400.8	79704.2	96289	91653.6	133954	126863	97391.6	97505.1	130735	117792	77069.6	77886.9
CPD-4081	4&alpha;-methyl-5&alpha;-ergosta-8,24-dien-3&beta;-ol	5837547	5923613	4994600	5.42111e+06	4433088	4.10876e+06	3750235	3.75575e+06	1970657	2.05403e+06	2.33582e+06	2.21382e+06	5.27964e+06	5076726	5.85629e+06	5898983	3165486	3.04263e+06	2336034	2477227	2.00789e+06	1.96273e+06	2.04733e+06	2.24662e+06	4681766	5009381	2710405	2.82888e+06	6.67711e+06	6.8179e+06	5245811	5.2064e+06	2.25408e+06	2.27716e+06	2402701	2.40152e+06	6.74687e+06	5803498	5805875	5.45444e+06	6732033	7.04691e+06	5240545	5.05397e+06	2.51677e+06	2.62267e+06	5.68447e+06	6.22021e+06
CPD-4101	24-methylidenelophenol	5837547	5923613	4994600	5.42111e+06	4433088	4.10876e+06	3750235	3.75575e+06	1970657	2.05403e+06	2.33582e+06	2.21382e+06	5.27964e+06	5076726	5.85629e+06	5898983	3165486	3.04263e+06	2336034	2477227	2.00789e+06	1.96273e+06	2.04733e+06	2.24662e+06	4681766	5009381	2710405	2.82888e+06	6.67711e+06	6.8179e+06	5245811	5.2064e+06	2.25408e+06	2.27716e+06	2402701	2.40152e+06	6.74687e+06	5803498	5805875	5.45444e+06	6732033	7.04691e+06	5240545	5.05397e+06	2.51677e+06	2.62267e+06	5.68447e+06	6.22021e+06
CPD-4124	24-ethylidenelophenol	1	54620.3	48835.1	50479.3	40340.2	47836.9	43398	41148.8	58515.4	55306.8	98288.8	93634.6	55058.7	56783.3	52432.6	52608.6	1	94201.2	63167.8	55951.4	58761.6	59669.7	46460.7	53100.8	1	62000.2	80373.9	79637.1	111136	108928	1	1	65935.9	66768.3	53597.8	53234.3	53200.3	61762.2	45369.4	52569.9	55185	53569.1	82234	92737.1	77099.7	71944.1	61318.3	59080.8
CPD-4125	avenasterol	5837547	5923613	4994600	5.42111e+06	4433088	4.10876e+06	3750235	3.75575e+06	1970657	2.05403e+06	2.33582e+06	2.21382e+06	5.27964e+06	5076726	5.85629e+06	5898983	3165486	3.04263e+06	2336034	2477227	2.00789e+06	1.96273e+06	2.04733e+06	2.24662e+06	4681766	5009381	2710405	2.82888e+06	6.67711e+06	6.8179e+06	5245811	5.2064e+06	2.25408e+06	2.27716e+06	2402701	2.40152e+06	6.74687e+06	5803498	5805875	5.45444e+06	6732033	7.04691e+06	5240545	5.05397e+06	2.51677e+06	2.62267e+06	5.68447e+06	6.22021e+06
CPD-4126	5-dehydroavenasterol	126741	118218	187539	198081	282171	284959	18310.4	18674	28361.5	24556.2	94571.5	83772.7	43001.1	1	25891.5	55857.9	211381	207267	62600.3	49687.7	17956.1	16977.3	82662.6	33557	25958.1	25221	147799	1	1	1	146073	145414	43479.1	122565	94413	35805.2	11492.9	16761.1	74142.2	18681.1	68776.9	69335.5	49833.8	56472.6	189908	64573.5	198675	167367
CPD-4127	isofucosterol	5837547	5923613	4994600	5.42111e+06	4433088	4.10876e+06	3750235	3.75575e+06	1970657	2.05403e+06	2.33582e+06	2.21382e+06	5.27964e+06	5076726	5.85629e+06	5898983	3165486	3.04263e+06	2336034	2477227	2.00789e+06	1.96273e+06	2.04733e+06	2.24662e+06	4681766	5009381	2710405	2.82888e+06	6.67711e+06	6.8179e+06	5245811	5.2064e+06	2.25408e+06	2.27716e+06	2402701	2.40152e+06	6.74687e+06	5803498	5805875	5.45444e+06	6732033	7.04691e+06	5240545	5.05397e+06	2.51677e+06	2.62267e+06	5.68447e+06	6.22021e+06
CPD-4141	24-methyldesmosterol	59769	59306.8	56152.3	60957.4	46955	49279.4	40943.6	41079.7	61542.2	60085.1	97492.9	102086	60005.9	54615.8	67125.4	62975.9	93972.8	88776	63181.5	60807.2	70026.2	74625.2	55870.1	58419.4	70986.3	70134.4	86880.8	86201.3	101937	105550	60621.5	56695.8	75516.1	76338.5	67319.5	63949.6	62474.3	61284.6	86883.1	92646.1	83350.2	77474	146376	147096	181554	180619	117161	119177
CPD-4142	&Delta;<sup>24-25</sup>-sitosterol	5837547	5923613	4994600	5.42111e+06	4433088	4.10876e+06	3750235	3.75575e+06	1970657	2.05403e+06	2.33582e+06	2.21382e+06	5.27964e+06	5076726	5.85629e+06	5898983	3165486	3.04263e+06	2336034	2477227	2.00789e+06	1.96273e+06	2.04733e+06	2.24662e+06	4681766	5009381	2710405	2.82888e+06	6.67711e+06	6.8179e+06	5245811	5.2064e+06	2.25408e+06	2.27716e+06	2402701	2.40152e+06	6.74687e+06	5803498	5805875	5.45444e+06	6732033	7.04691e+06	5240545	5.05397e+06	2.51677e+06	2.62267e+06	5.68447e+06	6.22021e+06
CPD-4143	sitosterol	47014.5	40165.2	42661.6	38085	27210.4	32513.5	31066.4	30140.5	44943	39880.6	135691	73315.9	42175.9	38842.3	36964.3	42007.3	60661.9	49640.5	37196.6	93965.1	37022.5	46840.1	38064.2	34619.3	98492.9	53311.5	45569.6	49729.6	77861.2	158934	42359.2	49994.6	52455.3	56290.5	43707.1	43858.9	37807	49277.9	37757.7	38660.9	40536	37862.5	56040.1	59062.7	57296.3	1	108376	1
CPD-4161	brassicasterol	59769	59306.8	56152.3	60957.4	46955	49279.4	40943.6	41079.7	61542.2	60085.1	97492.9	102086	60005.9	54615.8	67125.4	62975.9	93972.8	88776	63181.5	60807.2	70026.2	74625.2	55870.1	58419.4	70986.3	70134.4	86880.8	86201.3	101937	105550	60621.5	56695.8	75516.1	76338.5	67319.5	63949.6	62474.3	61284.6	86883.1	92646.1	83350.2	77474	146376	147096	181554	180619	117161	119177
CPD-4162	stigmasterol	5837547	5923613	4994600	5.42111e+06	4433088	4.10876e+06	3750235	3.75575e+06	1970657	2.05403e+06	2.33582e+06	2.21382e+06	5.27964e+06	5076726	5.85629e+06	5898983	3165486	3.04263e+06	2336034	2477227	2.00789e+06	1.96273e+06	2.04733e+06	2.24662e+06	4681766	5009381	2710405	2.82888e+06	6.67711e+06	6.8179e+06	5245811	5.2064e+06	2.25408e+06	2.27716e+06	2402701	2.40152e+06	6.74687e+06	5803498	5805875	5.45444e+06	6732033	7.04691e+06	5240545	5.05397e+06	2.51677e+06	2.62267e+06	5.68447e+06	6.22021e+06
CPD-4182	4&alpha;,14&alpha;-dimethyl-cholesta-8-enol	47014.5	40165.2	42661.6	38085	27210.4	32513.5	31066.4	30140.5	44943	39880.6	135691	73315.9	42175.9	38842.3	36964.3	42007.3	60661.9	49640.5	37196.6	93965.1	37022.5	46840.1	38064.2	34619.3	98492.9	53311.5	45569.6	49729.6	77861.2	158934	42359.2	49994.6	52455.3	56290.5	43707.1	43858.9	37807	49277.9	37757.7	38660.9	40536	37862.5	56040.1	59062.7	57296.3	1	108376	1
CPD-4183	4&alpha;-methyl-cholesta-8,14-dienol	59769	59306.8	56152.3	60957.4	46955	49279.4	40943.6	41079.7	61542.2	60085.1	97492.9	102086	60005.9	54615.8	67125.4	62975.9	93972.8	88776	63181.5	60807.2	70026.2	74625.2	55870.1	58419.4	70986.3	70134.4	86880.8	86201.3	101937	105550	60621.5	56695.8	75516.1	76338.5	67319.5	63949.6	62474.3	61284.6	86883.1	92646.1	83350.2	77474	146376	147096	181554	180619	117161	119177
CPD-4184	4&alpha;-methyl-5&alpha;-cholesta-8-en-3-ol	72712.2	1.64382e+06	1.40994e+06	1.44322e+06	1.11834e+06	1.0471e+06	37172.9	44586.8	57004.5	54822.3	102811	103345	1.57064e+06	1.49076e+06	1.44443e+06	1.49957e+06	102907	93272.8	57989.8	58580.6	1.59267e+06	61719.2	50598.9	52947.1	1.57493e+06	1.66948e+06	80842.6	84453.8	113564	121313	77484.1	1.7035e+06	1.81592e+06	78094.1	72764.4	1.56606e+06	1.96645e+06	1.74994e+06	1.67967e+06	1631505	1.61968e+06	1.62027e+06	1.90397e+06	85358.1	75148.3	1938232	68698.4	1.94504e+06
CPD-4186	lathosterol	1	1	1	1	1	1	37720.1	46486.2	1	1	1	1	1	1	1	1	1	1	1	1	1	1	74038.6	1	1	1	1	1	1	1	1	1	1	1	1	1	1	1	126382	76248.1	1	120510	1	1	1	1	1	1
CPD-4187	7-dehydrocholesterol	1	1	37461.2	33256.8	19338.1	20033.6	20158.5	20059.6	23768.6	29386.3	55811	55730	39870.3	32108.7	30045	32812.1	52834	51578.8	29171.6	1	33402.7	34489.8	28460.7	29768.7	30770.9	31823.3	49270.1	48980.8	63874	63944.7	1	1	50378.8	51453.3	43122	35776.3	1	126516	35777.5	37123	38704.7	36268.4	17373.6	42166.3	47649.4	47779.2	46716.8	46560.1
CPD-4205	<i>N</i><sup>6</sup>-(&Delta;<sup>2</sup>-isopentenyl)-adenosine 5'-monophosphate	68063.6	65924	75696.1	71649.2	41913.7	44640.5	1	1	51892.4	42961.7	90537.1	90446.2	73567.9	81090.3	65514.9	64600.5	76054.3	78947	71781.1	72979.1	78780.3	78125.7	60784.3	71407.7	57028.6	45916.4	93937.6	94982.6	51039.8	43460.1	72469.4	66249.6	64191.4	73852.9	64650.4	65036.6	23645.6	31072.8	37170.6	38521.7	47742.9	45522	54671.9	45676.9	49856.9	44942	64328.2	56146.8
CPD-4208	<i>trans</i>-zeatin riboside	72386.3	67030.9	114123	88449.5	62326.2	61450.3	1	1	19325.8	47392.4	79199.6	28492.8	63715.4	73118.8	76372.4	113330	77200	76776.5	18439.4	46993.2	47530.8	46077	52792.1	54359.5	18365.6	28921.2	90248.7	35296	65308.3	61388	85256.9	85113.9	73196.9	69793.3	61059.7	58563.2	58601	48282.5	81560.4	75232.6	110717	98930.1	37979.1	39224.9	120891	110110	188172	188590
CPD-4209	<i>N<sup>6</sup></i>-dimethylallyladenine	513599	500174	43554.3	405275	428440	453319	1	1	210961	233835	211681	195868	23551.4	387746	442520	116850	45647.7	344166	22231.8	274529	33490.3	31936	162704	230582	150950	49471.1	182571	179097	252214	10986.1	78858.6	89331.9	392459	364525	345407	301484	18860.3	17664.7	77833.9	70748.7	81613.3	38936.4	47334.1	37082.6	32255	35420.1	28917.2	23321.4
CPD-4210	<i>trans</i>-zeatin	272612	277393	323327	310094	173864	172367	1	1	150179	138793	301646	228602	238753	253478	301579	306992	270102	262798	143277	137675	132258	149863	171301	152919	43358.3	45517.9	253811	253280	136292	148113	368106	375209	250796	252390	188958	201471	44299.7	36234.2	57277	62478.3	150030	152678	1	23734.9	145379	115553	236544	255397
CPD-4211	prenyl diphosphate	32261	29790.2	34080.4	33832.6	29057.6	27835.8	1	1	16671.9	22353	34879.6	29251.7	30912.4	32305.3	30915	33962.3	26067	20682.4	23448.5	19294.1	32103.3	21746	28885.5	18103.2	1	1	28621.8	30493.3	21777.6	16608.2	34687.8	34685.2	32025.8	25142.3	18131.7	25688.1	17686.8	16568.5	11353.6	11669.9	1	18209.4	18031.9	17410.6	17579.4	23439.5	26524.2	20608
CPD-4261	1,8-cineole	22881.3	27368.9	1	737692	390741	392322	489818	1	369287	349998	1.69723e+06	1725079	603808	590614	864893	855153	1.03837e+06	1.04065e+06	973880	945468	1	546951	296107	1	2.51961e+06	2.51714e+06	1.15003e+06	1.14297e+06	780795	784895	893369	870730	411894	429137	1	436615	34683.1	37194.6	560427	582634	1	19934.1	708436	56407.3	459382	463870	404716	418187
CPD-440	<i>N</i>-feruloyltyramine	1	1	42805.5	32987.9	1	1	1	1	66495	49982.9	1	1	11638.3	11070.7	1	1	1	1	1	1	1	1	1	1	1	1	1	1	1	1	169681	171938	1	1	1	1	66298.6	57111.7	60280.4	64135.4	87179.8	94038.1	360518	348452	1.66423e+06	1.634e+06	1.70423e+06	1.77785e+06
CPD-444	<i>S</i>-methyl-5-thio-&alpha;-D-ribose 1-phosphate	17259.9	17089.3	29047.4	57604.6	27023.5	31496.2	57662.3	41478.4	54168	41086.6	77975.4	17557.8	29571.7	35722	19347.9	28086.6	31588.5	53425.4	72783.4	22913.9	81504.4	29658.4	51827.3	29248.6	87971	28129.5	29610.9	38301	23266.6	18648.6	37563.6	37539	40038.9	25317.2	27041	40119.3	55465.6	48703.4	59048.2	66832.1	81478.7	68744.5	37468.7	30990.1	51790.3	43121.5	23238.8	34948.3
CPD-4441	<i>cis</i>-zeatin	272612	277393	323327	310094	173864	172367	1	1	150179	138793	301646	228602	238753	253478	301579	306992	270102	262798	143277	137675	132258	149863	171301	152919	43358.3	45517.9	253811	253280	136292	148113	368106	375209	250796	252390	188958	201471	44299.7	36234.2	57277	62478.3	150030	152678	1	23734.9	145379	115553	236544	255397
CPD-4442	<i>cis</i>-zeatin riboside	72386.3	67030.9	114123	88449.5	62326.2	61450.3	1	1	19325.8	47392.4	79199.6	28492.8	63715.4	73118.8	76372.4	113330	77200	76776.5	18439.4	46993.2	47530.8	46077	52792.1	54359.5	18365.6	28921.2	90248.7	35296	65308.3	61388	85256.9	85113.9	73196.9	69793.3	61059.7	58563.2	58601	48282.5	81560.4	75232.6	110717	98930.1	37979.1	39224.9	120891	110110	188172	188590
CPD-4482	3-methyl-4-<i>cis</i>-hydroxy-2-butenal	3.85598e+06	3.38872e+06	3.64774e+06	3.84643e+06	3868648	4403389	1	1	2.08997e+06	2.63719e+06	2.25335e+06	2319596	3.92563e+06	4.1908e+06	4.27189e+06	4478707	4.15386e+06	3.77396e+06	2.37393e+06	2285950	1	2.35297e+06	2.11103e+06	2.86199e+06	3.13587e+06	3.37903e+06	3.073e+06	3.63156e+06	3.76143e+06	3.16634e+06	3.68725e+06	3525500	3.7804e+06	3.38479e+06	3.82237e+06	3.24865e+06	2.18792e+06	2.41278e+06	2.36278e+06	2809792	2.82715e+06	2.74971e+06	2036773	1.89284e+06	2.07623e+06	2.0677e+06	2144236	2.11582e+06
CPD-4483	3-methyl-4-<i>trans</i>-hydroxy-2-butenal	3.85598e+06	3.38872e+06	3.64774e+06	3.84643e+06	3868648	4403389	1	1	2.08997e+06	2.63719e+06	2.25335e+06	2319596	3.92563e+06	4.1908e+06	4.27189e+06	4478707	4.15386e+06	3.77396e+06	2.37393e+06	2285950	1	2.35297e+06	2.11103e+06	2.86199e+06	3.13587e+06	3.37903e+06	3.073e+06	3.63156e+06	3.76143e+06	3.16634e+06	3.68725e+06	3525500	3.7804e+06	3.38479e+06	3.82237e+06	3.24865e+06	2.18792e+06	2.41278e+06	2.36278e+06	2809792	2.82715e+06	2.74971e+06	2036773	1.89284e+06	2.07623e+06	2.0677e+06	2144236	2.11582e+06
CPD-457	4-O-&beta;-D-glucosyl-4-hydroxycinnamate	1	1	1	1	1	1	79522.9	72981.3	1	1	184489	1	1	1	1	1	1	1	1	1	1	1	1	74296.5	1	1	1	1	1	238927	1	1	1	1	1	1	1	1	1	1	1	1	1	1	1	1	1	1
CPD-4577	4&alpha;-carboxy-4&beta;-methyl-5&alpha;-cholesta-8,24-dien-3&beta;-ol	1.33552e+06	1.32224e+06	1.17458e+06	1.20905e+06	933438	840871	770910	772856	1.05501e+06	1.11455e+06	1.91756e+06	1.85891e+06	1.31276e+06	1.22312e+06	1.21926e+06	1.27186e+06	1.80449e+06	1.82553e+06	1.16228e+06	1.27742e+06	1.26516e+06	1.30838e+06	1.07041e+06	1.06187e+06	1.23753e+06	1334057	1.59849e+06	1.61158e+06	1.98403e+06	1915434	1403867	1371787	1.5871e+06	1.59129e+06	1.36099e+06	1.32604e+06	1.64633e+06	1418166	1.49509e+06	1.46645e+06	1.43734e+06	1.44273e+06	1.57383e+06	1.51581e+06	1.58432e+06	1.60812e+06	1.6638e+06	1.61579e+06
CPD-4578	3-dehydro-4-methylzymosterol	142688	132589	120238	129986	100175	108322	88495.9	102193	140553	139040	219316	221239	138842	138683	131448	140288	202749	194404	157849	145496	174775	163580	139168	133283	159768	154113	178307	192851	234747	226679	156691	152079	182400	179123	152968	156725	115778	133639	116101	122850	127971	124902	170425	182607	184268	173395	152802	150519
CPD-458	galactinol	3.79855e+06	3.89671e+06	6.29003e+06	6348743	4510986	3203974	2.13641e+06	2081430	4.56674e+06	4.4734e+06	4656413	4.70147e+06	5978054	6.17592e+06	6.34453e+06	6313536	4678329	5139589	3999598	3.95627e+06	3.83738e+06	3.80978e+06	4.20472e+06	3155300	2119866	2.11965e+06	3339953	4236087	3.14773e+06	3.16675e+06	7.44817e+06	7350209	5922449	5.89751e+06	6343942	4.60071e+06	10680722	10655959	10226054	10455715	11135567	10932998	16862422	16917802	22956946	23311250	16393775	16529612
CPD-4581	zymosterone	1	1	201298	214260	105584	112055	36005.8	32466	42887.4	99903.9	64101.7	64123.4	106508	113133	291510	305562	154372	150461	1	1	45503.6	46005.9	35926.3	41545.2	584952	576328	55893.4	53637.7	68773.9	74242.6	1	1	40125.1	41169.4	40540.9	39542.4	1	1	36448.8	41488.7	40912.7	41655.7	60804	61602.7	53072.1	51623.9	42920.2	36336
CPD-459	2-O-(&beta;-<i>D</i>-glucosyl)-2-hydroxycinnamate	1	1	1	1	1	1	79522.9	72981.3	1	1	184489	1	1	1	1	1	1	1	1	1	1	1	1	74296.5	1	1	1	1	1	238927	1	1	1	1	1	1	1	1	1	1	1	1	1	1	1	1	1	1
CPD-4602	isopentenyladenine-7-<i>N</i>-glucoside	33502.5	34925.7	45769.2	42674.7	1	18113.9	1	1	19864.9	10821.5	37448.1	44756	38543.9	34790.6	27224.3	36141.9	35300.9	28447.8	24058	19529.6	24984.9	14393.5	28731.8	28710.6	17548.4	42995.5	55751.1	42572.5	41768.1	37340.4	42432.3	39191.4	25984.8	35638.8	31948.1	29522.4	25283.6	11649.6	32604.3	16543.1	23060.1	10671.2	17148.1	11766.2	42733.4	53285.3	57410.7	61070.4
CPD-4603	isopentenyladenine-9-<i>N</i>-glucoside	33502.5	34925.7	45769.2	42674.7	1	18113.9	1	1	19864.9	10821.5	37448.1	44756	38543.9	34790.6	27224.3	36141.9	35300.9	28447.8	24058	19529.6	24984.9	14393.5	28731.8	28710.6	17548.4	42995.5	55751.1	42572.5	41768.1	37340.4	42432.3	39191.4	25984.8	35638.8	31948.1	29522.4	25283.6	11649.6	32604.3	16543.1	23060.1	10671.2	17148.1	11766.2	42733.4	53285.3	57410.7	61070.4
CPD-4607	benzyladenine-7-<i>N</i>-glucoside	1	1	1	1	1	1	1	1	1	1	1	10727.8	1	1	1	1	1	1	1	1	1	1	1	1	1	1	1	10547.6	1	1	1	1	1	1	1	1	1	1	1	1	10402.8	1	1	1	1	1	22765.4	1
CPD-4608	benzyladenine-9-<i>N</i>-glucoside	1	1	1	1	1	1	1	1	1	1	1	10727.8	1	1	1	1	1	1	1	1	1	1	1	1	1	1	1	10547.6	1	1	1	1	1	1	1	1	1	1	1	1	10402.8	1	1	1	1	1	22765.4	1
CPD-4609	kinetin	11692.5	10492.7	17612	11437.6	29388.9	31465.6	1	1	1	1	1	1	30502.1	24724.3	24301.8	29858.9	32135.4	30985.5	1	1	1	1	1	17433.5	17240.2	22427.2	16206.9	11757.7	25388.1	6368.4	11851.7	16308.8	22871.6	1	30414.6	17613.1	1	1	1	1	1	1	1	1	1	1	1	1
CPD-4612	<i>trans</i>-zeatin-7-<i>N</i>-glucoside	22745.5	17350.9	36543.2	35699.2	1	1	1	1	19821.4	11394.9	48799.4	47198.8	25550.5	24398.9	22734.9	19304.4	30254	26628.5	27479.3	29665.4	27402.3	32021.9	31997.1	27735.3	1	1	51043	51323.2	12597.6	10831.9	69055	77343.8	24970.8	25221.2	23444.5	24493	62571.5	59147.9	89364.8	79383.9	117163	112455	70148.6	68575.2	110541	114655	203174	203000
CPD-4613	<i>trans</i>-zeatin-9-<i>N</i>-glucoside	22745.5	17350.9	36543.2	35699.2	1	1	1	1	19821.4	11394.9	48799.4	47198.8	25550.5	24398.9	22734.9	19304.4	30254	26628.5	27479.3	29665.4	27402.3	32021.9	31997.1	27735.3	1	1	51043	51323.2	12597.6	10831.9	69055	77343.8	24970.8	25221.2	23444.5	24493	62571.5	59147.9	89364.8	79383.9	117163	112455	70148.6	68575.2	110541	114655	203174	203000
CPD-4614	<i>trans</i>-zeatin-<i>O</i>-glucoside	22745.5	17350.9	36543.2	35699.2	1	1	1	1	19821.4	11394.9	48799.4	47198.8	25550.5	24398.9	22734.9	19304.4	30254	26628.5	27479.3	29665.4	27402.3	32021.9	31997.1	27735.3	1	1	51043	51323.2	12597.6	10831.9	69055	77343.8	24970.8	25221.2	23444.5	24493	62571.5	59147.9	89364.8	79383.9	117163	112455	70148.6	68575.2	110541	114655	203174	203000
CPD-4615	dihydrozeatin-7-<i>N</i>-glucose	148316	159016	179865	175639	94301.7	92835.8	42923.2	41498.8	134937	116811	214916	220260	177740	181514	153150	150677	179099	169226	175172	167116	191052	189333	151061	159336	126588	121508	241841	240455	120735	119874	197430	189006	183835	192068	176818	170619	85104.4	82595.6	94940.6	96936.9	117184	120224	105668	97448.1	122166	113247	142034	143662
CPD-4616	dihydrozeatin-9-<i>N</i>-glucoside	148316	159016	179865	175639	94301.7	92835.8	42923.2	41498.8	134937	116811	214916	220260	177740	181514	153150	150677	179099	169226	175172	167116	191052	189333	151061	159336	126588	121508	241841	240455	120735	119874	197430	189006	183835	192068	176818	170619	85104.4	82595.6	94940.6	96936.9	117184	120224	105668	97448.1	122166	113247	142034	143662
CPD-4617	dihydrozeatin-<i>O</i>-glucoside	148316	159016	179865	175639	94301.7	92835.8	42923.2	41498.8	134937	116811	214916	220260	177740	181514	153150	150677	179099	169226	175172	167116	191052	189333	151061	159336	126588	121508	241841	240455	120735	119874	197430	189006	183835	192068	176818	170619	85104.4	82595.6	94940.6	96936.9	117184	120224	105668	97448.1	122166	113247	142034	143662
CPD-4618	<i>cis</i>-zeatin-7-<i>N</i>-glucoside	22745.5	17350.9	36543.2	35699.2	1	1	1	1	19821.4	11394.9	48799.4	47198.8	25550.5	24398.9	22734.9	19304.4	30254	26628.5	27479.3	29665.4	27402.3	32021.9	31997.1	27735.3	1	1	51043	51323.2	12597.6	10831.9	69055	77343.8	24970.8	25221.2	23444.5	24493	62571.5	59147.9	89364.8	79383.9	117163	112455	70148.6	68575.2	110541	114655	203174	203000
CPD-4619	<i>cis</i>-zeatin-9-<i>N</i>-glucoside	22745.5	17350.9	36543.2	35699.2	1	1	1	1	19821.4	11394.9	48799.4	47198.8	25550.5	24398.9	22734.9	19304.4	30254	26628.5	27479.3	29665.4	27402.3	32021.9	31997.1	27735.3	1	1	51043	51323.2	12597.6	10831.9	69055	77343.8	24970.8	25221.2	23444.5	24493	62571.5	59147.9	89364.8	79383.9	117163	112455	70148.6	68575.2	110541	114655	203174	203000
CPD-4620	<i>cis</i>-zeatin-<i>O</i>-glucoside	22745.5	17350.9	36543.2	35699.2	1	1	1	1	19821.4	11394.9	48799.4	47198.8	25550.5	24398.9	22734.9	19304.4	30254	26628.5	27479.3	29665.4	27402.3	32021.9	31997.1	27735.3	1	1	51043	51323.2	12597.6	10831.9	69055	77343.8	24970.8	25221.2	23444.5	24493	62571.5	59147.9	89364.8	79383.9	117163	112455	70148.6	68575.2	110541	114655	203174	203000
CPD-4621	dihydrozeatin-9-<i>N</i>-glucoside-<i>O</i>-glucoside	1	1	1	1	1	1	1	1	1	1	1	1	1	1	1	1	1	1	1	1	1	1	1	1	1	1	1	1	1	1	1	1	1	1	1	1	12232.7	10998.9	18556.3	18422.2	29248.8	27884	11286.4	11561.2	19569.7	11826	27895	25948
CPD-4622	<i>trans</i>-zeatin-<i>O</i>-glucoside-7-<i>N</i>-glucoside	126384	127118	125300	132702	139167	126395	63865.5	71390.3	118444	105965	132266	121233	121319	129847	727597	118048	118170	121490	110557	105096	120329	124704	107254	123261	130415	128618	162191	158740	145195	152713	128637	125003	112034	114767	116758	112070	110903	121045	114801	113843	119914	116949	127918	123440	717545	723155	689737	725069
CPD-463	L-nicotianamine	892687	884158	670289	651641	739975	771535	279814	288423	555177	536892	741587	740021	586456	590275	704358	700611	665378	638326	564520	567301	487309	489364	383532	379301	597833	594841	808067	806325	598838	597057	628329	613852	586741	571584	571238	586490	368754	356632	358450	353648	413008	401051	361699	349652	358942	363119	227268	236015
CPD-464	prephytoene diphosphate	21532.2	16710.8	18424.4	12522.3	389554	370132	37669	36328.5	18200.1	12879.5	74408.7	74140.6	53941.1	49578.1	11989.3	12141.3	43106.6	30054.7	106021	98246	345165	330906	329260	996681	93811.7	103717	1664216	2534998	502347	1.3533e+06	68470.8	62647.3	600886	263829	801197	792086	12039.1	16932.8	1.67076e+06	1.67009e+06	1950462	1.94186e+06	31370.7	27036.7	2.53046e+06	2509294	3.26456e+06	3.20057e+06
CPD-465	presqualene diphosphate	2.57534e+06	2.47868e+06	3.08253e+06	3.2824e+06	1.15426e+06	1.06243e+06	411754	394159	543770	556961	2.84888e+06	2.88662e+06	2.31658e+06	2329811	2361664	2.36006e+06	1.72933e+06	1.81263e+06	670810	688750	651043	671844	488876	466597	455845	486515	2305709	2.28019e+06	1.6122e+06	1.62062e+06	2808040	2.72875e+06	36313	44181.5	28172.5	30342.7	1.77899e+06	1837264	1.34868e+06	1.36542e+06	2194544	2160850	1.8255e+06	1.88177e+06	1552405	1.48783e+06	2.89349e+06	2898719
CPD-466	(S)-3-amino-2-methylpropanoate	365951	317126	285181	296660	356835	425946	97968.4	62650	40052.5	61152	48185.2	50291	272147	296862	243385	266258	245194	215553	64481.2	48021.4	62752.3	64274.7	66272.2	118431	160483	224479	125579	148139	284703	239524	139997	139791	137838	117491	113513	85355.6	52864.4	60729.4	71817.2	72842.6	67967.9	67856.4	55646.5	52316.8	96620.4	80758.5	68412.5	68479
CPD-4661	capsidiol	128246	126239	147062	146781	70029.8	70942.5	41581.9	41138.1	176852	166299	216672	226360	1	1	113885	117045	166861	155143	1	1	152732	149380	98249	103024	1	1	278890	274479	201134	194277	1	172443	147661	152502	163537	155696	158548	166757	208036	212638	189547	189282	1	1	248150	253094	289684	287735
CPD-4664	(+)-5-<i>epi</i>-aristolochene	10008067	10250409	12130515	13071168	9177101	10182660	5.09701e+06	4965004	7.1737e+06	8.34335e+06	9380539	8891325	11676431	12379546	16091837	16193546	13567948	15169451	8663122	8.34959e+06	9128672	10175257	4798923	7.26119e+06	18550654	15642931	8027599	9404203	17919206	16227334	13125201	13129094	16775499	15338528	16180670	13519722	12654365	15479160	13357180	14510842	10943390	10250724	9170830	9609601	9355079	8966394	10698298	10272175
CPD-468	L-2-aminoadipate	49188	54738	25847.3	22299	40757.1	41401.5	49662.5	44945	27028.2	28800.5	17647.2	18964	26350.6	26305.3	22425.1	21181.8	17727.6	20992.8	29622	35982.5	41914.6	41960.7	36858.1	40468	31682.3	22704.1	16151	16649	25149.2	27059.9	19536.4	19774.2	38725.1	32574	32727.9	26534.9	18294	23057.9	11658.2	17024.6	1	1	52131	65788.6	18384.9	35743.8	1	1
CPD-4702	4&alpha;-carboxy-5&alpha;-cholesta-8,24-dien-3&beta;-ol	364236	367958	292055	302856	220545	195871	183501	1	259845	266869	552297	517510	354355	305281	304239	322978	361436	538863	287388	334235	327626	347772	254192	258264	340791	378829	462377	460973	431433	567030	421860	302188	437532	462158	355955	1	489421	404043	419989	391540	394769	381031	453020	423163	460610	447464	472472	440416
CPD-4703	(-)-vetispiradiene	10008067	10250409	12130515	13071168	9177101	10182660	5.09701e+06	4965004	7.1737e+06	8.34335e+06	9380539	8891325	11676431	12379546	16091837	16193546	13567948	15169451	8663122	8.34959e+06	9128672	10175257	4798923	7.26119e+06	18550654	15642931	8027599	9404203	17919206	16227334	13125201	13129094	16775499	15338528	16180670	13519722	12654365	15479160	13357180	14510842	10943390	10250724	9170830	9609601	9355079	8966394	10698298	10272175
CPD-4721	solavetivone	201543	77592.4	282613	295717	48524.7	160920	58419.6	62502.4	1	195562	1	1	59685	247300	294251	1	258611	79042.2	1	1	87880.4	66743.9	61764	84415.8	128798	70850	330203	338116	342001	97791.4	343142	330904	68674.2	75542.9	220160	64003.5	642734	593118	645594	71188.1	461682	450260	73209.9	71121.3	539336	550808	388211	381700
CPD-474	(+)-taxifolin	258374	262422	128368	130970	63052.1	68034.1	31251.1	33737.5	183918	168264	129597	120592	158531	166828	216977	222361	172887	166923	134088	128006	139871	139471	116140	117311	52778.2	1	40322.6	38000.8	1	1	208298	211269	205762	218422	135202	140088	91147.5	89740.9	133318	129014	138414	133908	78452.2	71919.5	156330	157705	248871	256827
CPD-475	gibberellin A<sub>110</sub>	95500.4	91252.1	92346.3	102687	40400.2	38271	1	1	49325.2	32016.7	93655.7	89609.8	73986	87943.8	92674.4	92326.8	80125.1	77834.4	54694.3	43875.7	41266.4	43295.1	57179.1	52025	11503	1	76377.3	76604.2	33686.4	28099	121062	126179	87342.8	98533.7	72378.7	72360.4	69924.7	76185.1	94046.8	89332.6	163924	151038	81876.5	77592	145801	139938	296255	309509
CPD-477	gibberellin A<sub>97</sub>	1	1	1	1	1	1	1	1	1	1	1	1	1	1	1	1	1	1	1	1	1	1	1	1	1	1	1	1	1	1	1	1	1	1	1	1	1	1	10739.8	1	1	1	1	1	11380.8	1	1	1
CPD-479	4-(methylsulfanyl)-2-oxobutanoate	20667.2	18832.1	42495.2	33617.2	13141.2	18234.1	1	1	1	1	67584.6	66541.4	1	1	1	1	47925.1	43688.8	18969.8	21194.3	1	1	1	1	161314	163976	137992	148158	46637.5	44868.1	1	1	1	1	1	1	1	1	1	1	1	1	1	1	1	1	1	1
CPD-4862	<i>N</i>-hydroxy-L-valine	43029.3	42092.5	19233.5	24176.3	25970.9	24495.9	52643.7	46494.6	1	1	1	1	17484.1	23534.6	22596.8	18893.6	11717.9	16747.2	22773.2	29548.3	11055.5	1	1	1	33641.7	1	1	1	1	1	1	1	17786.4	18022.5	10925.4	1	1	1	1	1	1	1	1	1	1	1	1	1
CPD-488	&beta;-L-fucose 1-phosphate	1.9873e+06	79285.8	1.94781e+06	111063	10359	11714.6	683454	607940	949294	1.07206e+06	1.30605e+06	1.31344e+06	100438	2060816	2.18428e+06	2.2244e+06	112374	94549.8	1.19442e+06	1.12858e+06	1.28339e+06	1.29455e+06	1.06227e+06	11222.4	913210	943249	59611.1	1.60047e+06	1.39241e+06	1.29483e+06	121749	1.88454e+06	80249.4	75686.2	1.64577e+06	1.48953e+06	1.3807e+06	1.44836e+06	1.4855e+06	1.61621e+06	1.67168e+06	1.68734e+06	1.16503e+06	1.15077e+06	1.26941e+06	1.24495e+06	1.3048e+06	1.32157e+06
CPD-4886	(4<i>S</i>)-limonene	93381.3	91920.6	194273	199298	46873.8	53528.7	58958.6	66681.4	62270.1	55622.9	91960.6	93612.2	74675.3	84757.4	88194.8	91882.5	92745	88046.9	55002.4	52855.9	76901	79563.5	122142	126843	76900.3	72956.1	156817	23789.7	117903	123786	110547	104825	95484.9	98713.5	102027	108991	66144.1	66224.4	62024.8	64721.4	89290.8	94484.5	54567.8	47853.5	110745	109047	140348	23313.5
CPD-4887	(-)-(4<i>S</i>)-&alpha;-terpineol	22881.3	27368.9	1	737692	390741	392322	489818	1	369287	349998	1.69723e+06	1725079	603808	590614	864893	855153	1.03837e+06	1.04065e+06	973880	945468	1	546951	296107	1	2.51961e+06	2.51714e+06	1.15003e+06	1.14297e+06	780795	784895	893369	870730	411894	429137	1	436615	34683.1	37194.6	560427	582634	1	19934.1	708436	56407.3	459382	463870	404716	418187
CPD-4888	&beta;-myrcene	93381.3	91920.6	194273	199298	46873.8	53528.7	58958.6	66681.4	62270.1	55622.9	91960.6	93612.2	74675.3	84757.4	88194.8	91882.5	92745	88046.9	55002.4	52855.9	76901	79563.5	122142	126843	76900.3	72956.1	156817	23789.7	117903	123786	110547	104825	95484.9	98713.5	102027	108991	66144.1	66224.4	62024.8	64721.4	89290.8	94484.5	54567.8	47853.5	110745	109047	140348	23313.5
CPD-4889	(<i>E</i>)-&beta;-ocimene	93381.3	91920.6	194273	199298	46873.8	53528.7	58958.6	66681.4	62270.1	55622.9	91960.6	93612.2	74675.3	84757.4	88194.8	91882.5	92745	88046.9	55002.4	52855.9	76901	79563.5	122142	126843	76900.3	72956.1	156817	23789.7	117903	123786	110547	104825	95484.9	98713.5	102027	108991	66144.1	66224.4	62024.8	64721.4	89290.8	94484.5	54567.8	47853.5	110745	109047	140348	23313.5
CPD-4890	terpinolene	93381.3	91920.6	194273	199298	46873.8	53528.7	58958.6	66681.4	62270.1	55622.9	91960.6	93612.2	74675.3	84757.4	88194.8	91882.5	92745	88046.9	55002.4	52855.9	76901	79563.5	122142	126843	76900.3	72956.1	156817	23789.7	117903	123786	110547	104825	95484.9	98713.5	102027	108991	66144.1	66224.4	62024.8	64721.4	89290.8	94484.5	54567.8	47853.5	110745	109047	140348	23313.5
CPD-4891	(-)-&beta;-pinene	93381.3	91920.6	194273	199298	46873.8	53528.7	58958.6	66681.4	62270.1	55622.9	91960.6	93612.2	74675.3	84757.4	88194.8	91882.5	92745	88046.9	55002.4	52855.9	76901	79563.5	122142	126843	76900.3	72956.1	156817	23789.7	117903	123786	110547	104825	95484.9	98713.5	102027	108991	66144.1	66224.4	62024.8	64721.4	89290.8	94484.5	54567.8	47853.5	110745	109047	140348	23313.5
CPD-4892	(-)-&alpha;-pinene	93381.3	91920.6	194273	199298	46873.8	53528.7	58958.6	66681.4	62270.1	55622.9	91960.6	93612.2	74675.3	84757.4	88194.8	91882.5	92745	88046.9	55002.4	52855.9	76901	79563.5	122142	126843	76900.3	72956.1	156817	23789.7	117903	123786	110547	104825	95484.9	98713.5	102027	108991	66144.1	66224.4	62024.8	64721.4	89290.8	94484.5	54567.8	47853.5	110745	109047	140348	23313.5
CPD-4901	(+)-2-carene	93381.3	91920.6	194273	199298	46873.8	53528.7	58958.6	66681.4	62270.1	55622.9	91960.6	93612.2	74675.3	84757.4	88194.8	91882.5	92745	88046.9	55002.4	52855.9	76901	79563.5	122142	126843	76900.3	72956.1	156817	23789.7	117903	123786	110547	104825	95484.9	98713.5	102027	108991	66144.1	66224.4	62024.8	64721.4	89290.8	94484.5	54567.8	47853.5	110745	109047	140348	23313.5
CPD-4902	tricyclene	93381.3	91920.6	194273	199298	46873.8	53528.7	58958.6	66681.4	62270.1	55622.9	91960.6	93612.2	74675.3	84757.4	88194.8	91882.5	92745	88046.9	55002.4	52855.9	76901	79563.5	122142	126843	76900.3	72956.1	156817	23789.7	117903	123786	110547	104825	95484.9	98713.5	102027	108991	66144.1	66224.4	62024.8	64721.4	89290.8	94484.5	54567.8	47853.5	110745	109047	140348	23313.5
CPD-4903	(<i>Z</i>)-&beta;-ocimene	93381.3	91920.6	194273	199298	46873.8	53528.7	58958.6	66681.4	62270.1	55622.9	91960.6	93612.2	74675.3	84757.4	88194.8	91882.5	92745	88046.9	55002.4	52855.9	76901	79563.5	122142	126843	76900.3	72956.1	156817	23789.7	117903	123786	110547	104825	95484.9	98713.5	102027	108991	66144.1	66224.4	62024.8	64721.4	89290.8	94484.5	54567.8	47853.5	110745	109047	140348	23313.5
CPD-4942	(+)-pulegone	136888	143313	91020.5	107322	77833.5	64912.3	74177.9	59944.8	87154.5	85983.1	149501	149610	104315	101941	95065.2	101845	171449	150146	92038	104115	98706.9	108639	100075	91725.6	107703	128698	133019	121040	165041	186062	153735	153868	142778	148084	126403	115506	143813	115088	109059	102882	142766	123131	157282	134474	123486	128969	150108	129000
CPD-4981	(+)-menthofuran	235538	224706	303860	308455	162617	163810	43471.2	39527.3	150928	133831	250703	245955	209033	240354	256128	248541	192105	200189	139571	137622	160596	166856	133010	129243	52024.5	48362.5	157304	156791	106207	106216	275481	267187	203925	211813	182497	194176	279925	273073	274339	273873	350849	350565	569419	550012	1.00087e+06	1.03628e+06	854256	868984
CPD4FS-7	<i>cis</i>-abscisic alcohol	36020	27449.3	1	38331.3	11285.7	19092	1	1	26169.6	10513.5	48637.6	32748.3	39558.2	39304.7	26459.4	25574.4	16145.1	11202.8	30813.1	52333.8	27862.2	29029.7	41763.5	23218.9	31355	25920.2	39002.6	43981.2	37007	39655.8	40853.5	44842.3	41333.9	35994.3	24539.1	22988.5	11093.3	32361.7	35715.8	36351.4	49626.2	40628.5	17916.6	38213.7	46267.2	39262.9	52810	55939.6
CPD4FS-8	<i>trans</i>-abscisic alcohol	36020	27449.3	1	38331.3	11285.7	19092	1	1	26169.6	10513.5	48637.6	32748.3	39558.2	39304.7	26459.4	25574.4	16145.1	11202.8	30813.1	52333.8	27862.2	29029.7	41763.5	23218.9	31355	25920.2	39002.6	43981.2	37007	39655.8	40853.5	44842.3	41333.9	35994.3	24539.1	22988.5	11093.3	32361.7	35715.8	36351.4	49626.2	40628.5	17916.6	38213.7	46267.2	39262.9	52810	55939.6
CPD-505	D-<i>myo</i>-inositol (1,3,4,6)-tetrakisphosphate	83442.2	87659.1	81310.8	87055.7	59170.5	54285.2	58768.1	62045.2	71961.3	75176.6	122689	118960	88128.1	76985.1	82602.9	85555.8	122813	124341	78476.3	80965.2	86517	85339.7	79114.6	75905	87222.7	90134.7	96633.6	101175	151234	147384	101978	95402.3	109836	109259	94768.7	96458.2	146318	114554	112591	105149	100062	96270.5	105894	103105	110603	104020	107639	107492
CPD-506	D-<i>myo</i>-inositol (1,3,4,5)-tetrakisphosphate	83442.2	87659.1	81310.8	87055.7	59170.5	54285.2	58768.1	62045.2	71961.3	75176.6	122689	118960	88128.1	76985.1	82602.9	85555.8	122813	124341	78476.3	80965.2	86517	85339.7	79114.6	75905	87222.7	90134.7	96633.6	101175	151234	147384	101978	95402.3	109836	109259	94768.7	96458.2	146318	114554	112591	105149	100062	96270.5	105894	103105	110603	104020	107639	107492
CPD-534	D-<i>myo</i>-inositol (1,2,4,5,6)-pentakisphosphate	1	1	1	1	1	1	1	1	1	1	1	1	1	1	1	1	1	1	1	1	1	1	1	1	1	1	1	1	1	1	1	1	1	1	1	1	34663.1	30605.4	35048.7	31200.3	30945.7	27863.2	1	11067.2	11609.1	1	1	1
CPD-5441	N-dimethylethanolamine phosphate	13040.9	18955.5	25607.3	26506.1	13793	12703.8	32707.8	36391.5	1	1	1	1	1	29670	1	37131	35082.1	1	1	1	1	1	11759	11794.2	12281.7	12634.8	16774.8	20023.4	1	18562.6	17690.1	24699.8	26026.6	18917.6	27495.7	11944	258070	256026	256952	49443.7	48029.8	274400	305801	311628	305360	315419	1	311853
CPD-548	<i>S</i>-formylglutathione	1	1	17221.7	44821	1	1	1	1	38857.4	40080.5	81955.5	77088.8	11660.5	30617.1	33327	48377.3	49170.8	33670.5	25573.3	30771.2	28230.4	30748	23855.4	35494.3	1	1	81026.1	60669.7	37611.8	27350.4	76412.6	66519.2	58327.7	29419.3	17804.8	24622.1	13266.3	23539.2	6228.09	47869.5	64772.7	62669	43916.1	42622.7	71027.4	17787.9	18871.7	11392.3
CPD-5601	<i>N</i>-monomethylethanolamine	1	284848	340069	302166	338970	359751	1	419969	253434	265326	305322	775033	1.11779e+06	328436	288327	1.20966e+06	325237	311257	1	909127	694079	277207	276679	1	311364	1	397233	426256	388845	386427	293366	1.14748e+06	1.14608e+06	303813	289065	257929	318292	351166	325189	339415	396698	395930	368121	340528	512783	466591	516467	538545
CPD-5661	zeinoxanthin	396149	418754	420463	416705	573297	571027	378809	386036	608550	595990	459911	462126	365704	340690	388744	375204	487665	483977	653290	697271	745469	765515	864821	783199	372456	365419	619435	602757	711673	699749	319674	305477	833930	804793	635184	631228	218501	218589	187596	180774	186778	181804	183791	190115	199234	205066	189801	190986
CPD-578	urea-1-carboxylate	31395.8	16869.2	18119.1	1	28949.7	34567.4	35339.2	16469.6	24603.4	27544.6	19115.7	25427.9	18421.5	25992	18998.2	24365.4	26430	1	30423.4	27533.7	24288	26370.2	24685.7	28489	46243.5	54347.4	27377.3	37525.7	39172.1	37701.8	25170.2	29969.5	29458.2	33352.3	33354.1	42731.8	1	1	1	1	1	1	1	1	1	1	1	1
CPD-5846	3&beta;-hydroxy-4&beta;-methyl-5&alpha;-cholest-7-ene-4&alpha;-carboxylate	99852.8	102835	118585	123320	103732	112917	108143	104614	131533	133542	199154	215374	134178	125867	143175	141334	187520	181129	116089	127300	172181	184230	123953	125393	114230	109393	196435	191804	247664	252583	111438	113815	197660	185769	159986	157312	50641.7	111039	104593	109338	123983	124020	151336	159788	176881	157969	156030	160536
CPD-5881	(6R)-4a-hydroxy-tetrahydrobiopterin	1	1	1	1	1	1	1	1	1	1	1	1	1	1	1	1	1	1	1	1	1	1	1	1	1	1	1	1	1	1	1	1	1	1	1	1	1	1	1	1	1	1	1	1	1	1	1	1
CPD-590	(2<i>R</i>,3<i>S</i>,4<i>S</i>)-leucocyanidin	112548	115013	159006	157926	92123.9	95785.8	63079.9	48934.3	133234	131450	167246	164448	161672	160446	172233	171477	150650	147861	152156	138721	120636	124978	116023	111396	113761	107748	162876	174668	134372	120035	194115	178970	164029	165962	126393	127778	107903	104718	114468	110065	120078	119039	63341.6	66384.8	68951.6	67711.4	48075.4	52046.1
CPD-5962	5-&beta;-pregnan-3,20 dione	2.9024e+06	2874170	682987	689897	232047	223344	1.33232e+06	1.3597e+06	544293	541814	544715	534247	1.38783e+06	1.36032e+06	458103	468308	918141	896868	2585384	2.67246e+06	262822	269475	106174	108090	8625996	8839790	1.90325e+06	1.9077e+06	1.92346e+06	1.89504e+06	1.14973e+06	1.08995e+06	269078	289309	179497	177835	237251	225057	213863	724452	137644	147784	876216	884262	273598	276632	187062	168936
CPD-607	adenosine tetraphosphate	1	1	1	1	1	1	1	1	1	1	21654	21001.5	1	1	1	1	14825.9	15122.5	10974.3	1	16955.9	19075.1	1	1	12807.4	1	1	12254.9	31615	25755.2	13234.6	12066.2	12160.8	18383.9	1	12236.8	1	11751.1	1	1	1	1	1	16994.8	11134	1	1	1
CPD-6124	1-pyrroline	835743	827437	827414	852999	832376	851069	443617	321372	685532	688807	777812	767539	750232	781411	809752	819796	772647	754568	697580	655588	694700	708807	713118	710716	744837	712287	941192	951644	865509	862955	808605	792282	813814	808855	709391	683087	714833	261136	728734	213320	837983	817754	826495	776335	999156	976567	1.03744e+06	1.06075e+06
CPD-6141	N-methyl-&beta;-alanine	365951	317126	285181	296660	356835	425946	97968.4	62650	40052.5	61152	48185.2	50291	272147	296862	243385	266258	245194	215553	64481.2	48021.4	62752.3	64274.7	66272.2	118431	160483	224479	125579	148139	284703	239524	139997	139791	137838	117491	113513	85355.6	52864.4	60729.4	71817.2	72842.6	67967.9	67856.4	55646.5	52316.8	96620.4	80758.5	68412.5	68479
CPD-6142	N,N-dimethyl-&beta;-alanine	3.6415e+06	3530721	3.30355e+06	3323063	2.98628e+06	3.23693e+06	1.96444e+06	1.77944e+06	4014064	4.31102e+06	4741673	4.82034e+06	2.86007e+06	3.02898e+06	3.22003e+06	3372386	5172679	5095992	2.28117e+06	2.15584e+06	2.31351e+06	2.28576e+06	2.02234e+06	2582710	2.06487e+06	2.08617e+06	2.36644e+06	2659389	2457760	2.23225e+06	2.7995e+06	2.80093e+06	2.88241e+06	2.76565e+06	2.75535e+06	2.42543e+06	2042481	2.12753e+06	2.15786e+06	2.34686e+06	1918379	1.88595e+06	1.3614e+06	1.32022e+06	2.42275e+06	2.3757e+06	1.20702e+06	1171972
CPD-6181	&beta;-alanine betaine	3.81359e+06	3.57352e+06	3.88095e+06	3.72864e+06	3.31599e+06	3.62999e+06	1.17659e+06	1.0946e+06	2.22441e+06	2592868	2729737	2.54884e+06	3583101	3.6577e+06	3.56799e+06	3732843	3.53285e+06	3549583	2.55516e+06	2.33988e+06	2.38557e+06	2.48352e+06	2.34293e+06	2.99366e+06	2061642	1948070	2.91779e+06	3163098	3223069	2.99715e+06	3.09179e+06	3.03604e+06	3.15568e+06	2.96168e+06	2.99868e+06	2.72928e+06	1063823	1.16897e+06	1.37007e+06	1.35818e+06	1.46903e+06	1.42547e+06	1.03109e+06	1.09252e+06	1.25569e+06	1.16992e+06	1.10472e+06	1.11789e+06
CPD-6201	gibberellin A<sub>36</sub>	1	11224.1	18219.5	19830.7	12573.8	11103.8	1	1	21615.1	20704.4	29085.8	25300.2	17512.4	18951.7	12345.7	12045	20134.9	13702.3	14286	13267.6	21680.9	28826	21357.5	20947.9	1	1	29264	29852.8	27736.9	29282.5	12200.5	19956.6	28787.1	27175.5	27441	19346.4	16551.4	19537.3	13406.7	17652.4	16653.9	11262.4	19091.8	17121.5	49824.6	1	92017.9	98442.8
CPD-6221	gibberellin A<sub>13</sub>	666538	674376	803697	784211	290258	304866	78953.8	65878.7	328043	330116	507299	493012	630490	661284	808270	833099	691273	716149	296636	291616	281772	153545	222470	138567	147386	141203	471609	475107	285608	265319	707422	687654	575707	283806	464116	221721	181454	184573	209986	227278	286088	276672	170696	173161	360174	337376	420510	420539
CPD-6224	gibberellin A<sub>34</sub>	87680.3	88209.8	107126	100454	59075.9	54946	1	1	1	73385.8	1	1	88521.4	85681.3	82711.6	86660.3	90117.3	84818.8	1	1	1	81959	71936	1	44587.1	36548.3	10863	100348	81118.9	72912.1	87011.6	89990.8	93301.7	93813.8	74955.1	77048.4	29870.9	24567.1	32938.3	33885.3	44140.9	37432.7	24943.4	30402.6	24773.9	19629	26424.3	25867
CPD-632	gibberellin A<sub>34</sub>-catabolite	1	1	1	1	1	1	1	1	1	1	1	1	1	1	1	1	1	1	1	1	1	1	1	1	1	1	1	1	1	1	1	1	1	1	1	1	175856	177868	176079	131229	1	194773	326437	316575	431002	426011	1	1
CPD-633	gentisate	501786	499099	793234	842135	492390	530576	318975	293732	963515	989730	1.29834e+06	1.33063e+06	803601	842753	874988	899886	1.11635e+06	1.14127e+06	1.03586e+06	907375	1.05429e+06	1.02531e+06	953976	1.10486e+06	613086	613278	1.22529e+06	1312010	788520	782624	1.01871e+06	1.00066e+06	992676	1.03905e+06	1.09995e+06	1.03798e+06	1594456	1.58912e+06	1.73118e+06	1.76347e+06	2.24117e+06	2.21745e+06	1.45241e+06	1.46751e+06	2.08013e+06	2.04952e+06	1.45933e+06	1.34628e+06
CPD-634	castasterone	1	1	48835.1	50479.3	40340.2	47836.9	43398	41148.8	58515.4	55306.8	98288.8	93634.6	55058.7	56783.3	52432.6	52608.6	93881.9	94201.2	63167.8	55951.4	58761.6	59669.7	46460.7	53100.8	1	1	1	1	111136	1	1	1	10929.5	66768.3	53597.8	53234.3	1	1	1	52569.9	55185	53569.1	82234	92737.1	77099.7	71944.1	1	59080.8
CPD-6361	indolin-2-one	222877	12047.2	169453	155187	279095	177833	152430	238460	210169	205796	157466	112226	169627	170347	146146	146840	155263	142013	218229	203445	196030	184622	162976	185173	292033	169782	200002	197004	237054	223151	113799	104197	157630	164555	173130	161691	47707.7	48295.7	50598.3	49197.7	49984.6	55284.9	25865.7	18893.7	102474	109122	31651.3	27691.1
CPD-6362	3-hydroxyindolin-2-one	165630	152947	171163	179192	163272	177009	18412.3	18745.2	87850	91252	112304	125226	811231	834208	843178	859395	192702	805939	130729	131042	122686	99555.1	97008.3	100669	98152.2	97257.1	123159	139989	100892	99822.3	169569	158365	149083	129967	727071	152870	78929.6	79953.5	71145.9	83240.1	99083.9	95597.2	31402.3	25882.4	33952.9	24360.3	48136.2	41515.1
CPD-6364	HBOA	31481.4	31902.6	70181.5	73045.4	55092.4	40252.8	1	1	47001.5	47605.3	59983	58294.1	39080	33340.3	43435.7	46030.1	92707.8	91337.8	71969.4	72373	65947.6	64410	49832.7	50416.2	64997	59880.8	79472.9	83357.6	93134.3	83271	47751.9	49297.1	73145.9	66668.5	73770.3	64136.6	1	1	1	1	1	1	1	1	1	1	1	1
CPD-6421	methylcinnamate	52065.8	44942	12604.9	10650.7	11160.4	112635	18895.6	11898.3	15756.9	12871.3	62869.1	142022	35944.7	109724	58046.5	48605.1	58651.5	125523	116627	124634	11555.9	34416.4	11154.6	13448.2	50468	112360	136267	16700.3	63694	126809	33856.9	27132.2	65830.3	53425	26224.3	24913.5	168828	22907.8	67015.1	16877.1	17229.2	67110.9	138560	62270	77316.1	82223.6	70041.3	17132.9
CPD-6441	methyl benzoate	35471.2	31712.8	39481.3	30730.7	22773.5	27542	1	1	1	1	1	1	1	1	1	1	1	1	1	1	1	1	1	1	13123.8	11039.4	14707.3	14075.1	68477	63192.4	17895.8	1	1	1	1	1	16851.4	1	1	1	44986.3	49718	1	1	74283.9	72560.1	95553.1	1
CPD-6442	methylsalicylate	1	1	1	1	1	1	1	1	1	1	1	1	1	1	1	1	1	1	1	1	1	1	1	1	1	1	1	1	1	1	1	1	1	1	1	1	1	1	1	1	1	1	1	1	1	1	34259	27495.3
CPD-6443	benzylbenzoate	1	1	1	1	1	1	1	1	1	1	11373.1	1	1	1	1	1	1	1	1	1	1	1	1	1	1	1	12195.2	13610.4	1	1	1	1	1	1	1	1	24772.7	27937.3	27606.7	22142.3	30434.7	30541.9	27488.6	28250.7	30052.2	31131.2	50324.9	51462.7
CPD-648	(<i>S</i>)-4-hydroxymandelonitrile	165630	152947	171163	179192	163272	177009	18412.3	18745.2	87850	91252	112304	125226	811231	834208	843178	859395	192702	805939	130729	131042	122686	99555.1	97008.3	100669	98152.2	97257.1	123159	139989	100892	99822.3	169569	158365	149083	129967	727071	152870	78929.6	79953.5	71145.9	83240.1	99083.9	95597.2	31402.3	25882.4	33952.9	24360.3	48136.2	41515.1
CPD-6481	eugenol	175526	67161	190795	193914	352696	80333.3	49950.6	33420.7	2700987	2.33895e+06	121451	2073498	190563	82935.9	124626	147766	192131	186545	107006	119652	112598	109989	103987	112217	77508.5	79194.8	145859	142829	152620	148926	108744	103192	126256	133478	119639	119378	270887	784665	260546	240924	905331	886302	1.25449e+06	245416	263359	260820	1344368	224656
CPD-6482	methyleugenol	48765.6	24989.5	12128.5	16946.4	17720	41797.6	1	11735.1	12283.6	10954.7	55915.2	61385.4	6053.78	10935.2	18464.9	11842.6	47931.1	40175.7	17770.9	23815.2	12453.9	23671.2	26883.5	26900.9	26546.6	26167.6	63560.3	67301	44126.3	28862.7	47616.8	47187.7	30885.4	37792.1	39064.9	37074.3	111871	109837	122655	117326	13840.6	13668.3	78054.3	77339.4	110453	105227	37052.4	111447
CPD-6483	chavicol	59330.8	55335.8	50588.5	55366.5	31777.1	42950.6	19612.1	18790.3	40753.4	50469.3	45124.9	46088.7	51195.5	50144	53165.9	46610.2	51217.4	50432.3	33788.4	34596.1	38525.3	43853	32591.3	44822.8	1	1	53564.9	56206.2	48036.9	39352	52073.5	53179.2	54827.5	48075.2	42855.4	41668.7	18811	17863.8	14512.2	21974.1	18418.2	11970	12791.5	12418	29091.5	28391.4	20718.7	24187.1
CPD-6484	methylchavicol	172982	183222	323167	325684	327703	318705	350544	348176	353698	363228	196367	209699	352953	312942	176079	318582	312468	152889	185259	202638	349559	355565	162494	364190	1	333599	183869	349483	344255	324487	313139	181426	317624	305870	164317	323722	389741	320570	366133	368211	329044	321092	370112	370364	16731	10633.5	197180	357191
CPD-6501	benzyl acetate	168134	1.1108e+06	1	1	848291	12706.5	1	1	1	1	1	1	1	11700.8	1	18285	815030	12646.1	1	1	1	1	1	1	434946	426113	584959	590819	548974	533912	185650	405864	828319	823807	1	720882	1	1	18270.4	24646	16501.9	316226	10929.5	179908	191177	168482	75394.7	153138
CPD-653	(<i>S</i>)-NADHX	18768.7	24048.7	21322	17681.1	10494.6	10512.1	1	1	13494.1	12929.6	36128.7	30972.5	17667.1	11634.1	17734.4	22986.4	30253.7	35478.2	23325.4	18005.4	19819.7	25222.1	18456.9	17323	30839.8	26648.6	26978.5	24985.1	45565.1	43873.4	26508.5	26178.8	29139.3	27812.9	25787	18419.3	12186.7	27446.1	1	11871.4	11200	12461.4	22207.9	22470.5	20920.7	19212.2	17297.6	16994.9
CPD-659	L-arogenate	1	1	1	1	1	1	1	1	1	1	1	1	1	1	1	1	1	1	1	1	1	1	1	1	1	1	1	1	1	1	1	1	1	1	1	1	1	1	1	1	1	1	1	1	40420.1	43663.5	30664	29922.2
CPD-6741	D-<i>myo</i>-inositol (1,2,3,5,6) pentakisphosphate	1	1	1	1	1	1	1	1	1	1	1	1	1	1	1	1	1	1	1	1	1	1	1	1	1	1	1	1	1	1	1	1	1	1	1	1	34663.1	30605.4	35048.7	31200.3	30945.7	27863.2	1	11067.2	11609.1	1	1	1
CPD-68	1-aminocyclopropane-1-carboxylate	426919	409161	598339	563214	512126	563248	229780	233860	534554	514734	701479	697497	509691	522093	499595	518683	674840	646649	493156	465546	591858	589806	565451	560546	396058	366337	505418	507852	415102	460538	759581	754467	624053	604361	708394	703356	74207.9	83555.2	77025.6	83555.4	120803	111163	56978.2	56054.9	25266.9	19842.7	125095	132735
CPD-692	(+)-<i>cis</i>-abscisic aldehyde	29782.2	31638	1.21362e+06	1.26201e+06	46873.8	1243296	952340	954992	1.00187e+06	1.09596e+06	1.05327e+06	1.02179e+06	1.235e+06	1.3048e+06	41131.4	1.53978e+06	39681.4	30521	1112121	1.0455e+06	1.15929e+06	1259988	735716	940450	2.08951e+06	1.78756e+06	57894.4	131964	1.77556e+06	51938	21709.8	16856.9	27735.5	1.52021e+06	28190	1.43662e+06	27500.6	32733.2	1.43782e+06	27820.4	43954.2	42998.5	53808.6	1.32827e+06	1.21431e+06	1.23683e+06	1.32748e+06	1.2824e+06
CPD-6947	demethylphylloquinone	1	1	1	1	1	143148	1	1	1	1	1	1	1	1	1	1	380758	244830	1	11116.3	1	1	1	1	230616	1	388814	382723	463318	555578	351476	134844	1	1	1	1	1	1	1	1	1	1	1	1	1	1	1	1
CPD-6948	&beta;-amyrin	1	54620.3	48835.1	50479.3	40340.2	47836.9	43398	41148.8	58515.4	55306.8	98288.8	93634.6	55058.7	56783.3	52432.6	52608.6	1	94201.2	63167.8	55951.4	58761.6	59669.7	46460.7	53100.8	1	62000.2	80373.9	79637.1	111136	108928	1	1	65935.9	66768.3	53597.8	53234.3	53200.3	61762.2	45369.4	52569.9	55185	53569.1	82234	92737.1	77099.7	71944.1	61318.3	59080.8
CPD-695	gibberellin A<sub>53</sub>	95500.4	91252.1	92346.3	102687	40400.2	38271	1	1	49325.2	32016.7	93655.7	89609.8	73986	87943.8	92674.4	92326.8	80125.1	77834.4	54694.3	43875.7	41266.4	43295.1	57179.1	52025	11503	1	76377.3	76604.2	33686.4	28099	121062	126179	87342.8	98533.7	72378.7	72360.4	69924.7	76185.1	94046.8	89332.6	163924	151038	81876.5	77592	145801	139938	296255	309509
CPD-6954	p-coumaroyltriacetate	12779.7	12024.5	1	1	1	1	1	1	1	1	1	1	1	1	1	1	1	1	1	1	1	1	1	1	1	1	1	1	1	1	1	1	1	1	1	1	1	1	1	1	1	1	1	1	1	1	1	1
CPD-6956	bis-noryangonin	93012.1	99861.2	103839	100492	94024.8	99571.4	21258.2	18585.2	108069	121755	63857.9	63574.6	100856	95471.6	117133	113509	103426	100848	53021.6	101434	54081.2	114248	86110.9	85297.2	137471	118612	68584.2	91096.7	123499	122152	91393.9	93913.2	112894	82844.1	117353	107570	107889	108096	62378.3	94373.6	69329.1	75198.6	49756	97857.3	89028.6	87007.6	78853.2	90815.4
CPD-6959	pterostilbene	1	11209.7	1	1	23102.1	23848.1	13042.3	24954.4	1	1	1	1	1	1	12091.5	16463.5	1	1	1	1	1	1	10576.3	1	1	1	1	1	1	1	1	1	1	1	1	1	1	1	1	1	1	1	1	1	1	1	1	1
CPD-696	24-methylenecycloartanol	484137	307857	1	267659	216411	224371	247078	248821	277971	261435	446904	606060	280638	285768	396270	287062	416830	412212	316746	299345	310710	305085	240243	247383	367870	442988	367642	366193	470003	473915	306063	458395	1	360389	299339	446010	245874	267442	445405	426004	229602	441281	377649	481774	343288	321196	297860	279335
CPD-697	brassinolide	1	1	1	1	43351.5	39701.9	30313.4	33453.7	55890.4	51598.1	91634.8	1	1	1	51220	50922.8	1	1	50037.8	49832.2	61914.9	62582.8	49718.5	47862.5	60721.9	56132.2	1	1	1	93592.2	1	1	69669.2	1	1	54918.4	42525.7	47145.7	38325.9	46010	48259.2	47932	55270.7	1	68824.7	62753.4	60687.2	59503.3
CPD-6976	4-coumaroyl-4'-hydroxyphenyllactate	1	1	1	1	1	1	1	1	1	1	10591.3	1	1	1	11643.5	1	1	1	1	1	1	10520.6	1	1	69732.6	55479.6	1	1	17975.4	22778.8	1	10468.2	35845.8	26331.3	36326.1	6211.77	12212.2	12049.5	1	1	1	1	1	1	1	1	1	1
CPD-6978	4-coumaroyl-3',4'-dihydroxyphenyllactate	69273.1	72637.6	90459.1	82982.8	29754.4	38197.6	1	1	36789.4	37710.3	72285.4	79979.7	79307.5	89021	110596	110178	94331.8	86853.4	66191.5	63133.9	83993.8	97749.3	1	1	170878	154273	21762.1	36495.4	137669	130950	100890	92230.4	133026	131147	131305	129592	114732	121581	80529.3	92597.6	35785.9	30185.5	78922.9	73432.2	64268.1	66020.8	83536.4	82058
CPD-6979	caffeoyl-4'-hydroxyphenyllactate	69273.1	72637.6	90459.1	82982.8	29754.4	38197.6	1	1	36789.4	37710.3	72285.4	79979.7	79307.5	89021	110596	110178	94331.8	86853.4	66191.5	63133.9	83993.8	97749.3	1	1	170878	154273	21762.1	36495.4	137669	130950	100890	92230.4	133026	131147	131305	129592	114732	121581	80529.3	92597.6	35785.9	30185.5	78922.9	73432.2	64268.1	66020.8	83536.4	82058
CPD-698	campest-4-en-3-one	59769	59306.8	56152.3	60957.4	46955	49279.4	40943.6	41079.7	61542.2	60085.1	97492.9	102086	60005.9	54615.8	67125.4	62975.9	93972.8	88776	63181.5	60807.2	70026.2	74625.2	55870.1	58419.4	70986.3	70134.4	86880.8	86201.3	101937	105550	60621.5	56695.8	75516.1	76338.5	67319.5	63949.6	62474.3	61284.6	86883.1	92646.1	83350.2	77474	146376	147096	181554	180619	117161	119177
CPD-700	ergosta-5,7,24(28)-trien-3&beta;-ol	142688	132589	120238	129986	100175	108322	88495.9	102193	140553	139040	219316	221239	138842	138683	131448	140288	202749	194404	157849	145496	174775	163580	139168	133283	159768	154113	178307	192851	234747	226679	156691	152079	182400	179123	152968	156725	115778	133639	116101	122850	127971	124902	170425	182607	184268	173395	152802	150519
CPD-7002	dihydrogeranylgeranyl diphosphate	37427.7	40495.3	53865.8	47346.8	1	1	1	1	33419.3	18942.1	72364.3	66993.3	46988.8	48221.1	37364.6	43048.8	53918.2	53336.5	42945.3	51010.4	52257.5	54632.8	36384	41656.5	1	1	72533.5	79510.3	1	16204.4	71015.9	69372.4	47702.1	58693.5	47878.6	42138.5	1	1	28948.2	23042.7	42498.8	38955.7	1	1	34235.3	24283.8	51983.8	56065.5
CPD-7003	tetrahydrogeranylgeranyl diphosphate	1.21199e+06	1.20918e+06	1.11803e+06	1.08905e+06	981927	995123	571816	535289	1.0574e+06	1.01791e+06	888958	892559	1.15516e+06	1.18493e+06	1.10936e+06	1.12408e+06	1.23095e+06	1.19142e+06	878521	890259	809645	824419	898209	929895	565326	563979	786706	751986	623346	634024	947250	952523	1036695	976651	1.11988e+06	1.10196e+06	449852	465692	442534	441674	390167	383855	513752	526762	502348	514457	234903	232547
CPD-7016	7<sup>1</sup>-hydroxychlorophyll <i>a</i>	2.98559e+06	2.99997e+06	3.15589e+06	3.18547e+06	3436538	3.36752e+06	3.66418e+06	3.7757e+06	4.27351e+06	4326281	4.67031e+06	4.65739e+06	3.01317e+06	2.94739e+06	2699702	2.68663e+06	377142	3.6348e+06	3.61757e+06	3734315	4563679	4517965	4145381	4.20866e+06	3.06939e+06	3.19678e+06	5201175	5.23798e+06	1	1	3.22132e+06	3.08453e+06	3.87961e+06	3.99991e+06	3936767	3890425	5296496	5.09699e+06	5085562	4962588	3.51504e+06	3.61306e+06	4.79884e+06	4656551	3.91705e+06	3.97726e+06	2.82328e+06	2.90409e+06
CPD-7025	phytyl monophosphate	90745.2	85196	1	82281.1	134592	131999	139162	1	72349.8	115617	109836	103446	172388	167167	89119	268324	100217	98628.9	95261.7	89894	102967	104509	110015	104331	412520	409210	373516	109140	86875.2	231558	159118	79412.2	115571	120895	100140	84183.7	115344	130326	132305	142291	147601	141103	141236	149234	185107	172267	166023	169176
CPD-7035	2-phenylethanol	1	1	10563.6	1	10259.8	21242.4	1	1	1	1	1	17353.6	6137.95	10346.2	10625.1	33234.4	1	49987.5	1	29946.2	44881.3	1965.04	1	1	10577.7	1	1	1	1	1	22955	1	1	10352.3	1	1	212989	215203	199027	205225	291501	275836	354817	358516	395318	381400	222009	222665
CPD-706	24-methylenecholesterol	59769	59306.8	56152.3	60957.4	46955	49279.4	40943.6	41079.7	61542.2	60085.1	97492.9	102086	60005.9	54615.8	67125.4	62975.9	93972.8	88776	63181.5	60807.2	70026.2	74625.2	55870.1	58419.4	70986.3	70134.4	86880.8	86201.3	101937	105550	60621.5	56695.8	75516.1	76338.5	67319.5	63949.6	62474.3	61284.6	86883.1	92646.1	83350.2	77474	146376	147096	181554	180619	117161	119177
CPD-7061	pheophorbide <i>a</i>	458906	458222	620579	658869	134134	96311.3	1	1	45416.8	45835.2	145754	145544	498045	339430	336901	352208	239762	272722	171896	210661	121963	121371	140079	141302	24272.5	53762.5	110849	110126	28807.8	30856.7	380911	326108	231327	261264	138519	132653	52045.9	46281.8	68759	70397.2	119586	103452	50350.2	50482.5	112700	101390	201736	185986
CPD-7063	red chlorophyll catabolite	1	1	1	1	1	1	1	1	1	1	1	1	110789	1	1	1	1	1	1	1	1	1	1	1	1	1	1	1	1	1	1	1	1	1	1	1	1	143034	124456	126023	1	173084	169983	1	1	1	17169.9	11181
CPD-7064	primary fluorescent chlorophyll catabolite	1	1	1	1	1	1	1	1	1	1	1	1	1	1	1	1	1	1	1	1	1	1	1	1	1	1	1	1	1	1	1	1	1	1	1	1	1	1	1	1	1	1	1	1	52167.7	44813.5	67964	71539
CPD-707	campesterol	72712.2	1.64382e+06	1.40994e+06	1.44322e+06	1.11834e+06	1.0471e+06	37172.9	44586.8	57004.5	54822.3	102811	103345	1.57064e+06	1.49076e+06	1.44443e+06	1.49957e+06	102907	93272.8	57989.8	58580.6	1.59267e+06	61719.2	50598.9	52947.1	1.57493e+06	1.66948e+06	80842.6	84453.8	113564	121313	77484.1	1.7035e+06	1.81592e+06	78094.1	72764.4	1.56606e+06	1.96645e+06	1.74994e+06	1.67967e+06	1631505	1.61968e+06	1.62027e+06	1.90397e+06	85358.1	75148.3	1938232	68698.4	1.94504e+06
CPD-7079	(2<i>S</i>)-sakuranetin	83161.6	68077.9	58519.5	34226.9	13788	17849.2	1	1	48678.5	72222.9	40254.4	41556.9	52783	59404.4	73478.6	63180.8	54869	49662.3	49951.7	40729.2	53434.4	54890.9	42363.7	48653.5	1	11803	1	1	1	1	61778.9	45530.7	78742.3	66732.2	47001.9	43802.9	23945.5	18290.5	11615.1	26872	11142.5	22636.5	17813.6	11275.7	38599.7	40224.8	57040.9	65104.3
CPD-708	campest-4-en-3&beta;-ol	72712.2	1.64382e+06	1.40994e+06	1.44322e+06	1.11834e+06	1.0471e+06	37172.9	44586.8	57004.5	54822.3	102811	103345	1.57064e+06	1.49076e+06	1.44443e+06	1.49957e+06	102907	93272.8	57989.8	58580.6	1.59267e+06	61719.2	50598.9	52947.1	1.57493e+06	1.66948e+06	80842.6	84453.8	113564	121313	77484.1	1.7035e+06	1.81592e+06	78094.1	72764.4	1.56606e+06	1.96645e+06	1.74994e+06	1.67967e+06	1631505	1.61968e+06	1.62027e+06	1.90397e+06	85358.1	75148.3	1938232	68698.4	1.94504e+06
CPD-709	(5&alpha;)-campestan-3-one	72712.2	1.64382e+06	1.40994e+06	1.44322e+06	1.11834e+06	1.0471e+06	37172.9	44586.8	57004.5	54822.3	102811	103345	1.57064e+06	1.49076e+06	1.44443e+06	1.49957e+06	102907	93272.8	57989.8	58580.6	1.59267e+06	61719.2	50598.9	52947.1	1.57493e+06	1.66948e+06	80842.6	84453.8	113564	121313	77484.1	1.7035e+06	1.81592e+06	78094.1	72764.4	1.56606e+06	1.96645e+06	1.74994e+06	1.67967e+06	1631505	1.61968e+06	1.62027e+06	1.90397e+06	85358.1	75148.3	1938232	68698.4	1.94504e+06
CPD-710	campestanol	2.21379e+06	2.22017e+06	2.09822e+06	2.10501e+06	1707085	1.81826e+06	1.37629e+06	1.34958e+06	2.17682e+06	2.03487e+06	3367487	3.4464e+06	2.11446e+06	2.18477e+06	2.20043e+06	2181664	3.22915e+06	3.13041e+06	2.08503e+06	2.01686e+06	2.4372e+06	2.4259e+06	2.02048e+06	2050077	2.20994e+06	2.11232e+06	2.71764e+06	2.72275e+06	3.3643e+06	3447025	2.16766e+06	2.1419e+06	2697719	2733065	2423494	2.35511e+06	1.67833e+06	1.95207e+06	1.62076e+06	1.68752e+06	1.85262e+06	1.80419e+06	2.32281e+06	2.51947e+06	2.64853e+06	2443404	2.24735e+06	2.14701e+06
CPD-711	(6&alpha;)-hydroxycampestanol	54056.7	52254	42639.3	48505	32840.3	40734.9	32581.3	30075.8	43176.2	45959.2	1.71159e+06	1.73146e+06	54053.6	51807.2	52948.8	51604.4	2.35919e+06	2.2449e+06	55250.5	46864	50018.8	54199.1	46668.9	38016.4	4.57705e+06	56741.5	2.01863e+06	2051769	75673.1	6215150	60740.9	4278147	68966.7	1.65859e+06	57844.5	52131	3.85082e+06	4303024	37883.5	34855.8	37477.2	41304.6	52263.7	60582.2	1.89554e+06	53307.5	41350.7	3.86853e+06
CPD-712	6-deoxocathasterone	54056.7	52254	42639.3	48505	32840.3	40734.9	32581.3	30075.8	43176.2	45959.2	1.71159e+06	1.73146e+06	54053.6	51807.2	52948.8	51604.4	2.35919e+06	2.2449e+06	55250.5	46864	50018.8	54199.1	46668.9	38016.4	4.57705e+06	56741.5	2.01863e+06	2051769	75673.1	6215150	60740.9	4278147	68966.7	1.65859e+06	57844.5	52131	3.85082e+06	4303024	37883.5	34855.8	37477.2	41304.6	52263.7	60582.2	1.89554e+06	53307.5	41350.7	3.86853e+06
CPD-713	6-oxocampestanol	1	1	23270.4	111766	155585	137368	141737	120284	28725.7	105603	84272	50046.3	116218	105515	120934	131451	103350	117172	1	24402.9	108553	24723.7	110595	125374	94568.2	100805	87895.2	36411.8	48800.9	50065.6	1	1	120460	115499	118733	123147	1	1	20456.5	107171	101285	102406	110554	110057	83331.2	1	26109.4	66580.1
CPD-7137	pelargonidin-3,5-di-<i>O</i>-&beta;-<i>D</i>-glucoside	263489	262219	140868	159564	90508.6	92915.7	1	1	85079.1	64365.5	105127	98605.2	92498.3	96874.3	205167	205793	115880	113491	63758.3	66819.4	63792.9	70822.8	54022	50337.2	18751.5	12080.3	66868.3	67220.2	10428.1	12291.1	109544	114933	202214	207501	84086.7	90234.9	160614	150473	197050	194374	261628	243272	162850	171095	270505	264585	293228	308314
CPD-7138	cyanidin 3,5-di-<i>O</i>-&beta;-D-glucoside	3.25983e+06	3.31203e+06	1.70184e+06	1.76876e+06	921418	949949	590422	605980	2594936	2.33578e+06	1.78634e+06	1.74985e+06	2.15593e+06	2.18004e+06	2.83184e+06	2.76875e+06	2323002	2.21016e+06	1.85414e+06	1.82096e+06	1.94858e+06	1.94176e+06	1.75039e+06	1.74493e+06	727055	650475	567007	577823	1	1	2.62494e+06	2.63051e+06	2.70314e+06	2.79618e+06	1.85905e+06	1.82309e+06	1.28981e+06	1.27569e+06	1.79732e+06	1.77764e+06	1867021	1.76724e+06	1.06346e+06	1.05205e+06	2048291	2.00892e+06	3105568	3096655
CPD-714	cathasterone	1	1	1	1	1	1	32105.4	33458.4	1	1	1	1	1	1	1	1	1	1	1	1	11196.1	1	1	1	1	1	1	1	100164	108103	1	1	1	1	1	1	1	74866.3	1	66182.4	1	58149.3	62798.3	54702.9	61782.9	1	1	1
CPD-7142	salvianin	24479.3	23717.2	1	15703.2	1	1	1	1	1	1	47519.2	57053.3	23368.6	10826.5	1	17318.5	50728.8	41159.6	1	1	1	10779.3	1	1	1	22386.2	34824.5	43180.3	65550.6	54554.4	24522	35257.5	32825.2	39804.1	1	17074.7	63629.3	40124.1	29529.4	30008.6	24736.5	24740.2	24849.7	23276	23996.1	39511	33068	44509.8
CPD-7144	pelargonidin-3-<i>O</i>-rutinoside	93572.7	94236.5	50851.7	53920.1	34509	35750	1	1	35364.3	19436.7	41904	39865.2	31593.6	33831.8	74542	74469	44639.4	42417.5	26139.2	22490.7	20840.8	25587.6	17481.9	12423.6	1	1	20562.2	22164.9	1	1	45965.2	44962.3	69107.6	74039.6	29189.8	32164.7	52566.3	51425	69103	70907.3	92347.5	78043.7	60237.8	59436	85933.9	83469.7	97862.1	94899.4
CPD-7145	delphinidin 3-<i>O</i>-rutinoside	3.25983e+06	3.31203e+06	1.70184e+06	1.76876e+06	921418	949949	590422	605980	2594936	2.33578e+06	1.78634e+06	1.74985e+06	2.15593e+06	2.18004e+06	2.83184e+06	2.76875e+06	2323002	2.21016e+06	1.85414e+06	1.82096e+06	1.94858e+06	1.94176e+06	1.75039e+06	1.74493e+06	727055	650475	567007	577823	1	1	2.62494e+06	2.63051e+06	2.70314e+06	2.79618e+06	1.85905e+06	1.82309e+06	1.28981e+06	1.27569e+06	1.79732e+06	1.77764e+06	1867021	1.76724e+06	1.06346e+06	1.05205e+06	2048291	2.00892e+06	3105568	3096655
CPD-715	6-deoxoteasterone	3.07637e+06	3.06204e+06	2.63192e+06	2713618	2.12551e+06	1.97374e+06	1.72149e+06	1.79531e+06	2326864	2.39747e+06	4.00902e+06	3853806	2.9368e+06	2.7195e+06	2791718	2817641	3887384	3.83853e+06	2623545	2.85701e+06	2.74526e+06	2.77517e+06	2.41903e+06	2259849	2.80895e+06	3.11093e+06	3.53733e+06	3.55767e+06	4.00376e+06	3963422	3259941	3229139	3.35878e+06	3.43682e+06	3.00266e+06	2.88731e+06	3.88608e+06	3.36133e+06	3.41479e+06	3313155	3.25832e+06	3141912	3.47556e+06	3.3579e+06	3.50563e+06	3.55359e+06	3.62803e+06	3.62527e+06
CPD-716	teasterone	373602	374463	329108	325493	240215	272364	197935	194143	323325	279838	555008	557415	337456	376671	369119	370652	536967	549118	399585	363431	400582	385947	311364	288855	432321	391946	484919	471418	577805	566192	421484	432228	480810	476454	379448	375856	1	380837	1	1	259720	1	386839	429578	420058	394620	377570	417389
CPD-7166	cannabigerolate	183307	184798	1	1	107083	1	1	1	1	1	1	1	184621	181041	1	161014	239631	226703	1	1	1	1	1	1	82768.6	89674	195222	203786	106429	95762.4	230236	239883	1	192836	164702	167280	186671	176433	215681	215983	280218	261758	182371	198390	280617	252854	331299	337136
CPD-717	3-dehydro-6-deoxoteasterone	1	1	1	1	1	1	32105.4	33458.4	1	1	1	1	1	1	1	1	1	1	1	1	11196.1	1	1	1	1	1	1	1	100164	108103	1	1	1	1	1	1	1	74866.3	1	66182.4	1	58149.3	62798.3	54702.9	61782.9	1	1	1
CPD-7170	cannabidiolate	1	1	1	1	1	1	1	1	1	1	1	1	1	1	1	1	1	1	1	1	1	1	1	1	1	1	1	1	1	1	1	1	1	1	1	1	1	1	1	1	1	1	1	1	1	1	30467.4	21567.2
CPD-7173	cannabidiol	2.9127e+06	2.8924e+06	127328	532152	118844	1	1.25066e+06	1.32898e+06	572181	551206	31203.8	139619	1288564	1.27142e+06	147825	159255	703399	669015	1.89805e+06	1.94485e+06	1	1	1	11117.6	7.19944e+06	7.24716e+06	218928	224078	765933	782761	1.01101e+06	949141	1	242342	1	96710.4	187290	169800	640255	637751	112715	119059	1.06436e+06	1.05935e+06	326423	323573	198873	185398
CPD-718	3-dehydroteasterone	252559	260762	233518	248791	191874	179636	194922	190810	202841	226647	338236	317039	270757	229752	242170	253588	302600	326951	221141	279921	242386	236311	241873	216501	187586	304000	318879	270171	377373	385712	956060	248774	303816	246936	283521	238399	380179	294870	307469	289882	315456	287490	277706	290504	249051	248014	760254	242807
CPD-719	typhasterol	373602	374463	329108	325493	240215	272364	197935	194143	323325	279838	555008	557415	337456	376671	369119	370652	536967	549118	399585	363431	400582	385947	311364	288855	432321	391946	484919	471418	577805	566192	421484	432228	480810	476454	379448	375856	1	380837	1	1	259720	1	386839	429578	420058	394620	377570	417389
CPD-7190	(22&alpha;)-hydroxy-sitosterol	1.7928e+06	1837580	1.64232e+06	1.64455e+06	1.38133e+06	1.2032e+06	1.27491e+06	1.22547e+06	1.49019e+06	1.56316e+06	2444559	2.50786e+06	1	17773.4	1.76298e+06	1.87746e+06	2.29991e+06	2.33366e+06	1.68104e+06	1	1.83034e+06	1.77947e+06	1.65463e+06	1.6022e+06	1.87949e+06	1.8857e+06	2.09855e+06	2148906	2.69938e+06	2.68615e+06	1.95422e+06	1.96836e+06	2.21063e+06	2250194	1.88e+06	1.93131e+06	2.92958e+06	2281916	39651.8	2167560	2.06787e+06	1.99464e+06	2116816	2.06408e+06	2.06476e+06	2.10789e+06	2.29353e+06	2.26232e+06
CPD-7191	(22&alpha;)-hydroxy-isofucosterol	3.79872e+06	3.72191e+06	5084182	4865954	3.24489e+06	3.15061e+06	1.37386e+06	1.32347e+06	3.43322e+06	3.52055e+06	4565075	4587142	4.23243e+06	4.03843e+06	4.17792e+06	4074365	3.88659e+06	3.75404e+06	3.1207e+06	3.38595e+06	3.22889e+06	3.37948e+06	3532080	3.73405e+06	2.53832e+06	2752700	4.6505e+06	4.6871e+06	3146451	3.54935e+06	4648461	4.34787e+06	3.89195e+06	3.7468e+06	3.56383e+06	3.64662e+06	4.25198e+06	4027256	4618453	4.21622e+06	5.53477e+06	5250396	3.529e+06	3.54408e+06	5.11732e+06	5.3087e+06	5.91056e+06	6165165
CPD-7192	(22&alpha;)-hydroxy-cholestanol	75014.2	72647.4	13606.4	13478	46983.3	47145.2	49916.2	55352.6	68751.6	73882.9	101832	1	11304.4	69311	59901.1	18336.8	1	11240.2	71901.3	51109.2	68378.7	10896.3	46235.5	53643.9	90785.5	84223.6	13643.1	17858.1	130196	126950	11838.6	12866.1	11804.1	40525.4	1	70715.6	65761.8	85627	57933.9	62850.8	1	12984.6	45051.1	87371.1	40055.5	37564.1	1	20938.1
CPD-7193	epi-cholestanol	40223.8	1	59089.6	1	1	47588.8	1	1	25310	1	49609.3	48185.3	41885.1	40965.4	43732.3	1	36780.6	1	1	25433.9	34925.7	35118.5	29376	28853.6	1	1	1	1	1	38796.6	1	42986.8	1	50994.3	1	1	1	1	36376.3	1	1	52510.3	1	36267.3	1	1	82069.9	322890
CPD-7196	9-<i>cis</i>-violaxanthin	5032919	4.56583e+06	989891	3795528	2.00056e+06	3.39001e+06	1272602	1248740	3.51322e+06	1.06381e+06	3.90589e+06	1811350	3.51676e+06	1.4084e+06	1.70967e+06	1.16677e+06	788211	778095	4.03011e+06	4143734	1.46372e+06	2.13005e+06	1.81444e+06	1.11618e+06	1.83287e+06	1.05435e+06	3.4956e+06	1.74721e+06	3.07295e+06	3.2269e+06	806004	788199	4.76797e+06	2509569	2964413	1.30617e+06	833654	824014	745050	835478	974369	1.31938e+06	985421	1.35112e+06	1.61775e+06	1.30113e+06	1.30609e+06	1.45336e+06
CPD-720	6-deoxotyphasterol	3.07637e+06	3.06204e+06	2.63192e+06	2713618	2.12551e+06	1.97374e+06	1.72149e+06	1.79531e+06	2326864	2.39747e+06	4.00902e+06	3853806	2.9368e+06	2.7195e+06	2791718	2817641	3887384	3.83853e+06	2623545	2.85701e+06	2.74526e+06	2.77517e+06	2.41903e+06	2259849	2.80895e+06	3.11093e+06	3.53733e+06	3.55767e+06	4.00376e+06	3963422	3259941	3229139	3.35878e+06	3.43682e+06	3.00266e+06	2.88731e+06	3.88608e+06	3.36133e+06	3.41479e+06	3313155	3.25832e+06	3141912	3.47556e+06	3.3579e+06	3.50563e+06	3.55359e+06	3.62803e+06	3.62527e+06
CPD-7200	3-hydroxy-&beta;-ionone	526814	538256	675077	792595	339010	376364	412413	413374	582439	1.00368e+06	803218	996081	831568	542577	514268	492890	790198	798762	735882	1.12871e+06	1.25387e+06	788026	705412	786884	1.39042e+06	1.27993e+06	1.64437e+06	1.423e+06	1.12415e+06	1.18747e+06	969741	964606	592137	611796	666223	410288	1	1.156e+06	1.50186e+06	1.25799e+06	925452	1.44979e+06	1.06503e+06	790213	1.86238e+06	1.83547e+06	2.7767e+06	1
CPD-7202	4,9-dimethyldodeca-2,4,6,8,10-pentaene-1,12-dial	310279	295532	244968	233742	227277	228480	129100	128704	223837	221609	1	266479	252753	256085	254919	259653	229743	222690	255200	257155	269352	1	1	216249	179837	171147	218977	207896	190597	194598	188229	180898	266154	273362	237116	239696	130292	135192	119923	119723	106007	103050	127630	122067	63337.1	56250.1	43328	42642
CPD-7204	&beta;-ionone	34844.3	36632.3	51762.2	54222.7	41675.1	50356.8	11283.2	11372.7	44051.4	38898.6	46378.5	51215.4	35127.8	29430.5	35254.8	22878.9	47935.9	54095.5	41686.1	41268.7	41027.5	40379.5	42122.6	31498.8	35506	28343.8	71629	67157.1	78028.2	82538.9	35329.7	34196.5	52179.1	52352.6	47173.5	47777.8	41740	51404.1	41543.7	49128.7	42677.1	40597.4	57002.6	62591.4	55743.4	47077.2	40290.1	42691.6
CPD-723	6-deoxocastasterone	118822	22714.1	1	1	36699	39989.1	26056.1	22214.9	111428	1	1	66652.2	1	1	1	46645.8	1	1	40925.9	115802	1	1	1	51078.6	1	1	63264.7	57365.4	1	1	1	1	24651.6	61415.1	1	1	1	1	1	1	1	1	1	1	1	1	51136.3	55821.1
CPD-725	13(S)-HPOTE	56202.8	58504	80892.2	91215.7	62833.2	70085.1	1	1	59402.6	60103.7	84812.2	87101.7	71098.6	66627.2	76944.3	69793.5	100550	102365	65221	58080.3	60016.3	68475.1	61596	71922.8	45098.7	54846.5	100516	105918	113181	110298	74280.2	78003.6	89336.5	95926.9	87728.6	91541	140862	151015	169581	164525	146198	143503	129870	112230	142269	131612	140700	119765
CPD-7279	2-<i>cis</i>,4-<i>trans</i>-xanthoxin	36020	27449.3	1	38331.3	11285.7	19092	1	1	26169.6	10513.5	48637.6	32748.3	39558.2	39304.7	26459.4	25574.4	16145.1	11202.8	30813.1	52333.8	27862.2	29029.7	41763.5	23218.9	31355	25920.2	39002.6	43981.2	37007	39655.8	40853.5	44842.3	41333.9	35994.3	24539.1	22988.5	11093.3	32361.7	35715.8	36351.4	49626.2	40628.5	17916.6	38213.7	46267.2	39262.9	52810	55939.6
CPD-728	(9Z,13S,15Z)-12,13-epoxyoctadeca-9,11,15-trienoate	51378	57497.4	67981.3	63769	12010.2	153540	23455.9	1	28618.4	29881.7	68790.3	64913.5	240250	50883.6	54682.8	58509.4	56165.9	54114.6	46471	44229.5	40367.3	46384	29630.4	27326	131044	112107	295516	52928.3	217014	25948.1	61420.3	257405	61517.6	244290	56224.5	55576.2	66923.4	92565.3	130194	107800	175359	153942	53514.8	44752.3	103435	76890.1	158461	147817
CPD-729	dinor-12-oxo-phytodienoate	51378	57497.4	67981.3	63769	12010.2	153540	23455.9	1	28618.4	29881.7	68790.3	64913.5	240250	50883.6	54682.8	58509.4	56165.9	54114.6	46471	44229.5	40367.3	46384	29630.4	27326	131044	112107	295516	52928.3	217014	25948.1	61420.3	257405	61517.6	244290	56224.5	55576.2	66923.4	92565.3	130194	107800	175359	153942	53514.8	44752.3	103435	76890.1	158461	147817
CPD-730	8-[(1R,2R)-3-oxo-2-{(Z)-pent-2-enyl}cyclopentyl]octanoate	88391.7	79976.5	61581.1	61872.6	42554.3	50342.5	36428.9	26754.1	1	55613.9	101138	98180.9	67518.6	65716.3	71167.5	72667.5	109423	103728	16057.6	24037.1	13956.1	14056.6	11709.4	11893.9	1	70445.8	1	80781	117952	107739	88634.4	84333.6	86906.6	93448	71318.9	74055.6	74929.5	75819.5	69267.2	67790	60758.3	60875.5	83169.1	78519.2	84554.4	81095.1	77998.8	82138.1
CPD-7384	pelargonidin 3-<i>O</i>-&beta;-D-p-coumaroylglucoside	48532.1	51231.2	45333.8	47847.4	39449	32650.4	28409.9	29291	42754.6	44537.1	73591.3	76908.1	45512.9	45829.4	54201.2	47147.5	71654.6	64137.5	43344.6	46723.4	49292.3	55056.9	41723.6	43387	57706.2	66905.1	55396.8	58570.7	105844	96454.8	57572.8	56565.3	64314.6	68704.9	57417.3	57764.2	69737.9	67583.4	48716.3	50932.7	53949.4	56320.4	57458.4	64476.2	59128.2	64787.7	51899.7	52456.2
CPD-7409	&beta;-cryptoxanthin	396149	418754	420463	416705	573297	571027	378809	386036	608550	595990	459911	462126	365704	340690	388744	375204	487665	483977	653290	697271	745469	765515	864821	783199	372456	365419	619435	602757	711673	699749	319674	305477	833930	804793	635184	631228	218501	218589	187596	180774	186778	181804	183791	190115	199234	205066	189801	190986
CPD-7417	<i>cis</i>-coumarinic acid-&beta;-<i>D</i>-glucoside	1	1	1	1	1	1	79522.9	72981.3	1	1	184489	1	1	1	1	1	1	1	1	1	1	1	1	74296.5	1	1	1	1	1	238927	1	1	1	1	1	1	1	1	1	1	1	1	1	1	1	1	1	1
CPD-7419	&beta;-zeacarotene	166381	158136	171016	179173	1	121056	1	1	138519	148832	243182	236688	173421	178299	172698	162918	133610	1	183457	171987	165887	193962	175372	167100	1	90947.1	173358	179014	157787	163203	197303	200321	183979	180277	177891	171790	1	130683	130076	121816	163587	171385	1	128970	1	1	165348	154914
CPD-7424	9'-<i>cis</i>-neoxanthin	5032919	4.56583e+06	989891	3795528	2.00056e+06	3.39001e+06	1272602	1248740	3.51322e+06	1.06381e+06	3.90589e+06	1811350	3.51676e+06	1.4084e+06	1.70967e+06	1.16677e+06	788211	778095	4.03011e+06	4143734	1.46372e+06	2.13005e+06	1.81444e+06	1.11618e+06	1.83287e+06	1.05435e+06	3.4956e+06	1.74721e+06	3.07295e+06	3.2269e+06	806004	788199	4.76797e+06	2509569	2964413	1.30617e+06	833654	824014	745050	835478	974369	1.31938e+06	985421	1.35112e+06	1.61775e+06	1.30113e+06	1.30609e+06	1.45336e+06
CPD-7496	prolycopene	394381	395957	374778	388649	224478	246893	197219	194860	388305	348258	428553	442742	266712	284476	314434	376302	415577	454632	432470	296749	394725	454762	377015	363330	319118	299191	342767	483499	496594	512280	333696	472106	485781	473674	420740	409579	282151	338534	223150	237114	231267	228380	309857	343303	326125	300471	277016	271653
CPD-7524	7,9,9'-<i>cis</i>-neurosporene	166381	158136	171016	179173	1	121056	1	1	138519	148832	243182	236688	173421	178299	172698	162918	133610	1	183457	171987	165887	193962	175372	167100	1	90947.1	173358	179014	157787	163203	197303	200321	183979	180277	177891	171790	1	130683	130076	121816	163587	171385	1	128970	1	1	165348	154914
CPD-7526	9,9'-di-<i>cis</i>-&zeta;-carotene	1	1	296675	255797	164097	232361	139584	142143	207741	181599	281354	279158	301989	296674	306520	249890	219727	262154	249107	224726	223568	227710	200419	199479	182782	196625	295323	284946	184822	181875	321796	324808	246119	237620	246799	211793	1	233715	208714	224405	215524	219992	243628	229648	244229	277305	300597	281390
CPD-7535	9,15,9'-tri-<i>cis</i>-&zeta;-carotene	1	1	296675	255797	164097	232361	139584	142143	207741	181599	281354	279158	301989	296674	306520	249890	219727	262154	249107	224726	223568	227710	200419	199479	182782	196625	295323	284946	184822	181875	321796	324808	246119	237620	246799	211793	1	233715	208714	224405	215524	219992	243628	229648	244229	277305	300597	281390
CPD-7554	(+)-amorpha-4,11-diene	10008067	10250409	12130515	13071168	9177101	10182660	5.09701e+06	4965004	7.1737e+06	8.34335e+06	9380539	8891325	11676431	12379546	16091837	16193546	13567948	15169451	8663122	8.34959e+06	9128672	10175257	4798923	7.26119e+06	18550654	15642931	8027599	9404203	17919206	16227334	13125201	13129094	16775499	15338528	16180670	13519722	12654365	15479160	13357180	14510842	10943390	10250724	9170830	9609601	9355079	8966394	10698298	10272175
CPD-7557	artemisinic aldehyde	201543	77592.4	282613	295717	48524.7	160920	58419.6	62502.4	1	195562	1	1	59685	247300	294251	1	258611	79042.2	1	1	87880.4	66743.9	61764	84415.8	128798	70850	330203	338116	342001	97791.4	343142	330904	68674.2	75542.9	220160	64003.5	642734	593118	645594	71188.1	461682	450260	73209.9	71121.3	539336	550808	388211	381700
CPD-7672	3-(methylsulfanyl)propanoate	578431	662080	696873	537363	144878	145956	317237	329889	107156	122512	1	1	1	574434	1	1	550649	651235	1	125459	1	1	1	747513	235569	206564	1	674503	119778	100976	624486	1	1	706058	664449	674773	1	1	1	1	517798	520850	1	1	1	644446	1	570368
CPD-7682	1-piperideine 6-carboxylate	26218.7	27582.9	19087.9	12290	1	1	1	1	19323.1	1	38658.9	36499.8	25281	13999.7	19482.2	27055.3	50696.9	38967	18563.6	12221.1	17996.8	1	11605.4	17229.1	41329.6	26248.4	45682.2	38840.8	50880.6	47955.8	21930.7	19826.5	30651.2	30128.8	20913.6	25518	11633.1	17372.9	1	1	18824.3	12157.3	21751.3	26306.8	21418	31040.4	22154.5	34054.8
CPD-7710	thebaine	23680.7	18977.4	34081	33104.1	23583	18895.5	1	1	11328.3	16464	37856	43833.3	27097.2	27998.2	17350.5	22050.5	27768.6	32956.6	30813.8	32295.8	27455	26554.6	17098	10943.6	1	1	36948.4	45292.3	11704.3	11785.7	37404.6	36275.6	27261.4	37006.6	18888.2	17914.7	1	10321.8	11070.7	1	10714.8	16400.9	17048.7	16962.8	29380.9	1	24372.6	23270.8
CPD-7712	neopinone	587539	610596	243900	245549	143628	134587	143081	142116	216402	201056	313753	318443	212860	201804	195151	203333	326603	317598	261187	262411	187670	191555	175078	182087	253318	285241	253369	258915	285871	295730	499270	487348	271510	263755	200166	207359	359953	415700	182826	181239	176468	177933	247088	248174	220481	223982	215110	213806
CPD-7727	&beta;-D-glucopyranosyl abscisate	57152.6	58514.6	36316.2	35702.6	33751.6	41920.4	1	1	24548.3	25280.3	62157.4	60103.9	34715.1	34033.5	17045.4	62745	24416.5	11408.7	32800.7	20044.6	39124.5	46459.2	48965.8	51689.5	32855.4	24004.2	1	1	11652.4	10604.2	38073.9	36539	12005.5	18157.4	18813.4	17330.9	12597.7	17804	23696.5	18352.8	26448.2	25442.7	27782.3	32932.7	20052.8	11182.8	43615	44359.7
CPD-7843	pelargonidin 3-<i>O</i>-sophoroside	263489	262219	140868	159564	90508.6	92915.7	1	1	85079.1	64365.5	105127	98605.2	92498.3	96874.3	205167	205793	115880	113491	63758.3	66819.4	63792.9	70822.8	54022	50337.2	18751.5	12080.3	66868.3	67220.2	10428.1	12291.1	109544	114933	202214	207501	84086.7	90234.9	160614	150473	197050	194374	261628	243272	162850	171095	270505	264585	293228	308314
CPD-7850	echinenone	11157111	11064414	11000696	10929538	8728671	8730843	3813314	3751936	11466926	11301573	15405283	15483246	9123689	9524443	9839876	9792199	11334068	11451956	13138419	13181679	14358937	14464890	12051751	11770597	6504339	6.4399e+06	11628846	11563579	9773080	1	9105862	8904265	13589407	13753813	12452206	12352645	2.44334e+06	2.74108e+06	1.99554e+06	2.06549e+06	2.59205e+06	2.53332e+06	1.85236e+06	1.8634e+06	2.38655e+06	2.21492e+06	3.90302e+06	3.83741e+06
CPD-7851	canthaxanthin	835982	132366	687687	50736.2	474147	503814	30516	30770	51289.6	47378.3	933643	130432	768665	119003	839486	817560	684041	639871	707448	690326	814148	840239	49665.3	643106	695433	593153	681294	646068	1.05238e+06	1.05187e+06	737079	763634	852813	74200.1	723930	683509	417317	652759	312646	352856	350838	357274	591473	679519	679518	585066	546480	535256
CPD-7854	3,4,3',4'-tetradehydroisozeaxanthin	835982	132366	687687	50736.2	474147	503814	30516	30770	51289.6	47378.3	933643	130432	768665	119003	839486	817560	684041	639871	707448	690326	814148	840239	49665.3	643106	695433	593153	681294	646068	1.05238e+06	1.05187e+06	737079	763634	852813	74200.1	723930	683509	417317	652759	312646	352856	350838	357274	591473	679519	679518	585066	546480	535256
CPD-7857	(6<i>E</i>)-8-hydroxygeraniol	10287.2	1	11881.7	12021.2	1	1	1	1	1	1	19462.2	19855.1	1	1	18028.8	19498.9	17349.3	17710.9	1	1	1	1	1	1	1	1	23850.9	17443.1	1	1	25963.9	21410.5	1	1	1	11171.5	1	1	1	1	1	1	1	1	1	1	31858	35487.4
CPD-7901	2-tridecanone	1	1	1	1	1	1	1	1	1	14755.9	1	30296	10768	1	1	1	35883	36175.1	1	1	1	1	1	1	1	1	1	1	1	1	1	19448.8	1	1	1	1	1	1	12046	1	27354.6	27960.6	1	1	13583.6	12518	24121.4	22098.1
CPD-7988	Triton X-100	34379.8	36645	253667	264730	255407	39046.5	43065.3	43760	37208.5	288176	45349.8	305171	245094	36367.5	33480.7	36777.8	31682	1	39097.9	44176.6	37800.4	40315.9	45300.6	39036.1	32277.4	43685.5	269181	48700.1	275124	47138.9	37422.5	44227.6	38239.4	43925.5	46332.8	33349.2	200268	234177	202242	211368	44307.6	40032.9	233577	228613	46733.6	241459	47389	47965
CPD-7989	(+)-valencene	10008067	10250409	12130515	13071168	9177101	10182660	5.09701e+06	4965004	7.1737e+06	8.34335e+06	9380539	8891325	11676431	12379546	16091837	16193546	13567948	15169451	8663122	8.34959e+06	9128672	10175257	4798923	7.26119e+06	18550654	15642931	8027599	9404203	17919206	16227334	13125201	13129094	16775499	15338528	16180670	13519722	12654365	15479160	13357180	14510842	10943390	10250724	9170830	9609601	9355079	8966394	10698298	10272175
CPD-7994	N-methyl-&Delta;<sup>1</sup>-pyrrolinium cation	85733.4	81502	57903.1	59932.2	78950.3	72939	50424.2	47048.3	67381.9	55498.8	65724.2	71581.4	49152.7	52702.7	42682	45672.5	30375.8	23348.7	74642.1	72275.3	80413.3	78945.1	81615.4	84571.2	41718.1	22475.2	11711.7	58903.1	32534.7	19121.5	45040.8	45424.5	12117.5	17746.9	45659.3	38908.3	11028.2	18395.8	23401.5	1	1	16815.6	11229.9	1	1	12314.5	1	1
CPD-7995	hygrine	16587.5	12981.7	31903.5	29815.3	1	1	11281.7	11553.2	48441.7	12819.9	74682.7	41410.4	10840.7	36477.5	10758.8	17546.3	32132.1	21047.9	54036.3	27033.2	28269.4	64994.1	53804.1	28826.6	31716.4	26910.2	67393.3	45109.4	94122.8	30738.1	41194.5	42698.6	22471	21909.6	19933.8	28219.2	30808.5	92280.4	75934.9	39302.2	45754	87925.6	78092.1	32878.5	151654	147385	105351	217003
CPD-7996	littorine	158260	160162	237586	242194	122818	118457	1	1	1	105226	19626	18495.1	141809	144752	175765	172903	1	1	1	1	121220	1	99404.5	11329	1	1	194344	190970	11368.8	12189.9	198482	206478	16316.4	11838.3	16897.2	11060.4	22973.2	24060.7	19423.8	24467.4	1	17133	56195.9	62524.4	200094	189969	290721	1
CPD-8001	calystegine A3	41231.4	32635.9	61358.1	66527.2	36533.6	34662.8	11710.1	18249.8	26088.5	30308.7	11237.3	34252.3	29733.4	55280.8	70513.8	66436.4	60141.4	84406	32030.2	30604	39252.2	15712.7	38480.7	45192.7	1	1	1	35619.3	21961.6	1	65011.8	62880.4	66888.8	61608.9	66672.8	29374.6	1	32302.4	49000	65878.1	74197.4	65366.3	1	1	29747.8	23169.9	42435.8	48279.3
CPD-8050	<i>scyllo</i>-inositol	820412	878758	1.25882e+06	1.22293e+06	310300	65275.3	47496.3	26202.3	2134499	985698	107029	907661	1.14597e+06	639575	1.17112e+06	1.20168e+06	1.01073e+06	987522	296172	249093	268654	180608	132094	186752	81539	127229	1	133984	132312	119542	407991	519398	388860	31467.5	350478	353424	1167135	1.00522e+06	1.04997e+06	961638	1099263	1.07598e+06	1.39765e+06	1.39441e+06	1.36252e+06	1.41268e+06	1.58136e+06	1.51725e+06
CPD-8058	D-galactosylononitol	23678.1	31335	1	1	1	1	59192.3	17879.1	1	1	17211.1	11750.6	1	1	1	1	1	1	1	1	11865.3	1	1	1	210920	187613	11301.2	12686.5	1	1	1	1	1	1	1	1	1	1	1	1	1	1	1	1	1	1	1	1
CPD-8073	1-18:2-2-16:0-monogalactosyldiacylglycerol	8230053	8408434	7.79981e+06	8093519	7312759	7344842	4967104	5143686	6993877	6438476	5946910	5982396	8.28819e+06	8036750	8109875	8.20987e+06	6524153	6.47654e+06	6.9215e+06	6601711	6376784	6.36219e+06	6.64893e+06	6.71644e+06	5.87904e+06	5837422	6.1817e+06	6.06343e+06	6375206	6.6334e+06	8727438	8412321	6193688	6193737	7.15235e+06	7019677	5081706	4841714	5.1747e+06	5.05601e+06	6.17673e+06	6105539	4.7355e+06	4565522	4.8583e+06	4.96655e+06	6.68412e+06	6.81221e+06
CPD-8074	1-18:3-2-16:0-monogalactosyldiacylglycerol	4771021	4954791	4.42973e+06	4.38286e+06	4.10024e+06	4386994	3.86297e+06	3997113	1.76801e+06	1.69088e+06	1	1	3667538	4.01382e+06	4.50104e+06	4.47986e+06	1	1.40615e+06	1.8079e+06	1.53663e+06	1	1	1.51177e+06	1.53774e+06	2273423	2366773	1.57252e+06	1.86981e+06	4289070	4357610	3.44757e+06	3212741	1264786	1.22938e+06	1.4421e+06	1474498	1.76354e+06	1.80675e+06	1.71549e+06	1.74668e+06	2.92285e+06	3141364	1.60096e+06	1.6061e+06	1	1.05198e+06	1.73672e+06	1.77251e+06
CPD-8075	1-18:2-2-16:1-monogalactosyldiacylglycerol	4771021	4954791	4.42973e+06	4.38286e+06	4.10024e+06	4386994	3.86297e+06	3997113	1.76801e+06	1.69088e+06	1	1	3667538	4.01382e+06	4.50104e+06	4.47986e+06	1	1.40615e+06	1.8079e+06	1.53663e+06	1	1	1.51177e+06	1.53774e+06	2273423	2366773	1.57252e+06	1.86981e+06	4289070	4357610	3.44757e+06	3212741	1264786	1.22938e+06	1.4421e+06	1474498	1.76354e+06	1.80675e+06	1.71549e+06	1.74668e+06	2.92285e+06	3141364	1.60096e+06	1.6061e+06	1	1.05198e+06	1.73672e+06	1.77251e+06
CPD-8076	1-18:3-2-16:1-monogalactosyldiacylglycerol	7.51559e+06	7461102	7365475	7.45576e+06	7.14345e+06	6.6143e+06	5.75489e+06	5524491	4888174	4825961	4871529	4710003	7.62454e+06	6955174	7558961	7.38519e+06	4.5659e+06	4421602	5.06282e+06	5550544	4.88934e+06	4412936	4373536	4.50503e+06	4.48864e+06	5346771	4839790	4.73074e+06	6771986	6.77096e+06	7321992	7064199	4435314	4385514	5013349	4915778	4.56545e+06	3915843	4010146	3.91526e+06	5.16674e+06	5.22538e+06	3.66334e+06	3.68775e+06	2.61582e+06	2.56968e+06	4500512	4.69873e+06
CPD-8077	1-18:1-2-16:2-monogalactosyldiacylglycerol	4771021	4954791	4.42973e+06	4.38286e+06	4.10024e+06	4386994	3.86297e+06	3997113	1.76801e+06	1.69088e+06	1	1	3667538	4.01382e+06	4.50104e+06	4.47986e+06	1	1.40615e+06	1.8079e+06	1.53663e+06	1	1	1.51177e+06	1.53774e+06	2273423	2366773	1.57252e+06	1.86981e+06	4289070	4357610	3.44757e+06	3212741	1264786	1.22938e+06	1.4421e+06	1474498	1.76354e+06	1.80675e+06	1.71549e+06	1.74668e+06	2.92285e+06	3141364	1.60096e+06	1.6061e+06	1	1.05198e+06	1.73672e+06	1.77251e+06
CPD-8078	1-18:3-2-16:2-monogalactosyldiacylglycerol	9608084	10081759	10580124	10643411	10732607	9866518	10141938	9792016	10866955	11303247	11639733	11725341	11282864	10144186	10015789	10381477	10050824	9746161	10421502	11776436	10976644	11028560	10702986	11002893	8855346	9890232	10807727	10646147	10725326	10491012	9599452	9669402	10623401	10644028	10431502	10521557	8.21703e+06	6.69998e+06	8431505	7934220	8.03661e+06	8012502	8.12678e+06	7.66674e+06	7.33355e+06	7.50524e+06	7.86409e+06	8.29088e+06
CPD-8079	1-18:1-2-16:3-monogalactosyldiacylglycerol	7.51559e+06	7461102	7365475	7.45576e+06	7.14345e+06	6.6143e+06	5.75489e+06	5524491	4888174	4825961	4871529	4710003	7.62454e+06	6955174	7558961	7.38519e+06	4.5659e+06	4421602	5.06282e+06	5550544	4.88934e+06	4412936	4373536	4.50503e+06	4.48864e+06	5346771	4839790	4.73074e+06	6771986	6.77096e+06	7321992	7064199	4435314	4385514	5013349	4915778	4.56545e+06	3915843	4010146	3.91526e+06	5.16674e+06	5.22538e+06	3.66334e+06	3.68775e+06	2.61582e+06	2.56968e+06	4500512	4.69873e+06
CPD-8080	1-18:2-2-16:3-monogalactosyldiacylglycerol	9608084	10081759	10580124	10643411	10732607	9866518	10141938	9792016	10866955	11303247	11639733	11725341	11282864	10144186	10015789	10381477	10050824	9746161	10421502	11776436	10976644	11028560	10702986	11002893	8855346	9890232	10807727	10646147	10725326	10491012	9599452	9669402	10623401	10644028	10431502	10521557	8.21703e+06	6.69998e+06	8431505	7934220	8.03661e+06	8012502	8.12678e+06	7.66674e+06	7.33355e+06	7.50524e+06	7.86409e+06	8.29088e+06
CPD-8081	1-18:3-2-18:3-digalactosyldiacylglycerol	9657970	9176495	9189300	14745620	16090605	16406860	17798534	18201358	17851302	18208756	15847853	15527545	15709819	16044404	15013821	14346326	14331845	14172571	16405425	16450765	17196766	16740166	18231592	18228512	13773099	14397969	15168878	14846466	15381417	15998093	9708362	15689082	16368403	15717763	16186846	16064266	13355015	12487805	13786766	13348016	13293836	13460449	13101747	13707244	13221985	9084694	7759089	7.92801e+06
CPD-8082	1-18:2-2-18:2-digalactosyldiacylglycerol	1.52373e+06	1523661	1.51834e+06	1.51272e+06	1.14649e+06	1.13002e+06	713572	701652	1.3207e+06	1.286e+06	1.43218e+06	1.42872e+06	1.41065e+06	1.34858e+06	1.41866e+06	1.44858e+06	1.29352e+06	1.28154e+06	1.18983e+06	1.2123e+06	1404164	1.373e+06	1.38809e+06	1361200	877538	874586	1.35376e+06	1.32987e+06	1.25766e+06	1.26547e+06	1.6246e+06	1597707	1.46538e+06	1484929	1.47498e+06	1.47173e+06	974885	979071	979673	975378	1.14305e+06	1.14457e+06	1102609	1.08258e+06	1.4162e+06	1.33054e+06	1.57347e+06	1.5058e+06
CPD-8083	1-18:2-2-18:3-digalactosyldiacylglycerol	5.12405e+06	5.07252e+06	5031405	5.10288e+06	3.77215e+06	3.81446e+06	1.79059e+06	1.81625e+06	5004858	4.95696e+06	5.53716e+06	5.59381e+06	5353468	5.09251e+06	5.04442e+06	5100928	5.07109e+06	5.06441e+06	4757055	4852315	5.23634e+06	5.11288e+06	4942504	4875178	3.22263e+06	3.13195e+06	5.06462e+06	5.18577e+06	4407466	4.29334e+06	5971360	5.78149e+06	5058847	5.12431e+06	5345814	5106579	3.53825e+06	3.3527e+06	3.77541e+06	3.60484e+06	4.0874e+06	4.1231e+06	3682042	3.72538e+06	4.62218e+06	4503306	5.22374e+06	5377944
CPD-8084	1-18:3-2-18:2-digalactosyldiacylglycerol	5.12405e+06	5.07252e+06	5031405	5.10288e+06	3.77215e+06	3.81446e+06	1.79059e+06	1.81625e+06	5004858	4.95696e+06	5.53716e+06	5.59381e+06	5353468	5.09251e+06	5.04442e+06	5100928	5.07109e+06	5.06441e+06	4757055	4852315	5.23634e+06	5.11288e+06	4942504	4875178	3.22263e+06	3.13195e+06	5.06462e+06	5.18577e+06	4407466	4.29334e+06	5971360	5.78149e+06	5058847	5.12431e+06	5345814	5106579	3.53825e+06	3.3527e+06	3.77541e+06	3.60484e+06	4.0874e+06	4.1231e+06	3682042	3.72538e+06	4.62218e+06	4503306	5.22374e+06	5377944
CPD-8086	1-linoleoyl-2-palmitoyl-phosphatidylglycerol	613239	655852	1.22702e+06	1.26272e+06	740875	706011	202143	228875	1.58411e+06	853216	1.37847e+06	1.37188e+06	916091	964314	1.11333e+06	952364	1.31845e+06	1211809	1.0916e+06	821877	1.06115e+06	1.23388e+06	856797	837176	305533	319093	1.10117e+06	1.17312e+06	713137	750734	958070	1.01746e+06	1.13094e+06	1.46087e+06	1.18588e+06	997692	1.03237e+06	1.05397e+06	981202	1.16376e+06	1252637	839903	1.30444e+06	1.32107e+06	1.55027e+06	1.48045e+06	1.92561e+06	1.90371e+06
CPD-8087	1-&alpha;-linolenoyl-2-palmitoyl-phosphatidylglycerol	2.18798e+06	323147	1.96934e+06	576117	903560	697031	420074	451004	329447	569271	1.63728e+06	2.34263e+06	127141	1.99247e+06	321195	329007	453001	287386	447937	1.32547e+06	1086072	559597	544309	1.45833e+06	1.08451e+06	511563	531298	1.1149e+06	1.03793e+06	1.00648e+06	2.34928e+06	2.23312e+06	1.37545e+06	603135	352526	1.22765e+06	1	238550	643912	749474	280591	544962	441886	475666	1	832266	1264955	645550
CPD-8088	1-linoleoyl-2-oleoyl-phosphatidylcholine	3.59079e+06	3.44568e+06	3.80985e+06	3.77691e+06	3.17542e+06	3.09353e+06	1.10902e+06	1087901	6328997	2.08742e+06	9620372	9312257	4.19749e+06	3.89078e+06	3.14455e+06	3.1184e+06	2678430	2617055	7.24041e+06	7.62557e+06	8356453	2.67652e+06	2.1672e+06	6590270	1.08168e+06	3.24354e+06	2.33706e+06	2.27666e+06	2.43156e+06	2.44808e+06	5005548	4.83006e+06	2985355	2987234	2.70781e+06	2.60368e+06	954358	1710967	1.15924e+06	1.11461e+06	1.3975e+06	1.35938e+06	1.02759e+06	996746	2.05295e+06	2.06027e+06	1.70331e+06	1.70979e+06
CPD-8089	1-&alpha;-linolenoyl-2-oleoyl-phosphatidylcholine	20850882	20869118	22195764	21616816	18530326	18575938	11197744	11660204	35764432	36906420	49823816	49300828	24355850	23502624	21954236	22144480	41377788	41669748	38254192	39867224	44601320	44764020	39844400	39821916	21777030	22256606	39107960	38434892	18588024	18349394	27201794	27340960	47310204	47149660	41940480	41970728	24242862	22493486	26119524	25938534	21031900	21488652	21964048	21112974	37522608	37524964	28405360	27792806
CPD-8090	1-&alpha;-linolenoyl-2-linoleoyl-phosphatidylcholine	9836242	8746963	10679486	10196313	1.2514e+06	1252197	5.42821e+06	5131308	18852974	19678640	25687330	25448554	10795375	10766775	9901740	9342851	1627888	22452638	18505808	20272346	22772566	23176556	20816316	20995472	872430	909179	1.41871e+06	1.511e+06	1.11157e+06	1.04738e+06	14638421	14205275	1.72791e+06	1.82775e+06	1.68434e+06	1672076	15875799	14043630	17202580	17421736	1113623	827762	15148670	15431305	32353024	31508494	1.35648e+06	1.35267e+06
CPD-8091	1-oleoyl-2-linoleoyl-phosphatidylcholine	3.59079e+06	3.44568e+06	3.80985e+06	3.77691e+06	3.17542e+06	3.09353e+06	1.10902e+06	1087901	6328997	2.08742e+06	9620372	9312257	4.19749e+06	3.89078e+06	3.14455e+06	3.1184e+06	2678430	2617055	7.24041e+06	7.62557e+06	8356453	2.67652e+06	2.1672e+06	6590270	1.08168e+06	3.24354e+06	2.33706e+06	2.27666e+06	2.43156e+06	2.44808e+06	5005548	4.83006e+06	2985355	2987234	2.70781e+06	2.60368e+06	954358	1710967	1.15924e+06	1.11461e+06	1.3975e+06	1.35938e+06	1.02759e+06	996746	2.05295e+06	2.06027e+06	1.70331e+06	1.70979e+06
CPD-8092	1-oleoyl-2-&alpha;-linolenoyl-phosphatidylcholine	20850882	20869118	22195764	21616816	18530326	18575938	11197744	11660204	35764432	36906420	49823816	49300828	24355850	23502624	21954236	22144480	41377788	41669748	38254192	39867224	44601320	44764020	39844400	39821916	21777030	22256606	39107960	38434892	18588024	18349394	27201794	27340960	47310204	47149660	41940480	41970728	24242862	22493486	26119524	25938534	21031900	21488652	21964048	21112974	37522608	37524964	28405360	27792806
CPD-8093	1-linoleoyl-2-&alpha;-linolenoyl-phosphatidylcholine	9836242	8746963	10679486	10196313	1.2514e+06	1252197	5.42821e+06	5131308	18852974	19678640	25687330	25448554	10795375	10766775	9901740	9342851	1627888	22452638	18505808	20272346	22772566	23176556	20816316	20995472	872430	909179	1.41871e+06	1.511e+06	1.11157e+06	1.04738e+06	14638421	14205275	1.72791e+06	1.82775e+06	1.68434e+06	1672076	15875799	14043630	17202580	17421736	1113623	827762	15148670	15431305	32353024	31508494	1.35648e+06	1.35267e+06
CPD-8122	molybdopterin adenine dinucleotide	211491	216331	1	11437.2	1	1	1	1	174293	1	301709	295022	1	193401	1	1	306106	286342	1	1	1	226364	1	1	233071	1	243220	245086	395527	401398	263354	244267	272117	278453	227564	218600	233811	262288	1	1	1	169106	1	1	257684	1	1	218439
CPD-8123	MoO<sub>2</sub>-molybdopterin cofactor	30336.9	28880.1	21672.8	28437.2	12982.9	1	17709.2	11830.1	25944.1	26682.3	48041.6	45081	29733	22474.5	23471.2	31006.6	44437	45771.5	26748.6	28863.7	31235.2	30651.4	20061.6	26857.2	27106.3	31059	33601.7	41195.8	62294	61231.7	39572.6	33115.1	43076.6	42869.8	31063.2	31083.8	60830.9	45890.8	42473.3	34620.2	36870.4	31994.3	39242	33127.5	34711.3	40716.4	35091.1	32282.6
CPD-8124	thio-molybdenum cofactor	138212	139173	142507	141589	113522	105344	94644.8	84961.3	135554	125061	200874	191577	135595	131534	151472	154909	197582	207751	141576	130224	153119	165635	129666	133270	156337	136123	190378	182200	234743	243930	170323	162862	205517	201535	172743	153475	123695	167569	102833	119640	121655	128091	138895	152747	165552	156982	141916	130224
CPD-8134	24-<i>epi</i>-campesterol	72712.2	1.64382e+06	1.40994e+06	1.44322e+06	1.11834e+06	1.0471e+06	37172.9	44586.8	57004.5	54822.3	102811	103345	1.57064e+06	1.49076e+06	1.44443e+06	1.49957e+06	102907	93272.8	57989.8	58580.6	1.59267e+06	61719.2	50598.9	52947.1	1.57493e+06	1.66948e+06	80842.6	84453.8	113564	121313	77484.1	1.7035e+06	1.81592e+06	78094.1	72764.4	1.56606e+06	1.96645e+06	1.74994e+06	1.67967e+06	1631505	1.61968e+06	1.62027e+06	1.90397e+06	85358.1	75148.3	1938232	68698.4	1.94504e+06
CPD-8135	crinosterol	59769	59306.8	56152.3	60957.4	46955	49279.4	40943.6	41079.7	61542.2	60085.1	97492.9	102086	60005.9	54615.8	67125.4	62975.9	93972.8	88776	63181.5	60807.2	70026.2	74625.2	55870.1	58419.4	70986.3	70134.4	86880.8	86201.3	101937	105550	60621.5	56695.8	75516.1	76338.5	67319.5	63949.6	62474.3	61284.6	86883.1	92646.1	83350.2	77474	146376	147096	181554	180619	117161	119177
CPD-8155	pheophytin a	50886932	53418032	54211548	54607784	64087388	63867932	23308408	52117368	52709624	73806320	69020024	70505416	53902748	53291412	46869640	47114620	65876204	65450820	18499780	71884096	23195794	47997932	20688410	21320782	64869740	62986636	44017748	44276036	46774520	19457892	44765820	44893112	18729950	19029736	66454828	66942940	50922040	50921568	43599104	46363096	29442430	29064386	55935620	53969556	43740620	43457936	29469452	28270802
CPD-8157	1-palmitoyl-2-oleoyl-phosphatidylcholine	17430502	17356958	18497374	17970928	14974805	15086662	8430291	8722552	28452786	29676960	40662780	39992436	20110620	19381356	17916960	18345874	34033428	34274220	30488834	32334704	35895480	36334520	31631630	31850022	17418744	17641910	32111682	31196132	15015429	14970608	22970702	22682096	38949196	38732196	34040724	34294136	20357032	18557226	21653276	21568874	17555568	17946876	18001090	17197716	30792252	30842060	23877758	23441108
CPD-8158	1-palmitoyl-2-linoleoyl-phosphatidylcholine	8678147	8.03156e+06	8534253	8872161	7000679	6.68347e+06	4.96953e+06	4875803	16784932	16693571	23570450	23033222	10017368	10431595	9198173	8797911	18851614	19033430	16614058	16647306	19466154	19946526	17934850	18071088	8.15373e+06	9425930	18384808	17871660	7.63823e+06	7389344	13390883	12963022	21901932	22364804	18070574	17694722	13632730	12354215	14611387	15432734	12934413	12728872	13645804	14209477	27303744	27551870	19580436	19623472
CPD-8159	1-palmitoyl-2-&alpha;-linolenoyl-phosphatidylcholine	5075642	4918606	4882887	4766599	3.90079e+06	3652293	771702	779964	8505519	8826843	11243585	11447387	5835683	5692164	4706131	4602016	8421099	8135195	7540219	7847300	9594005	9311248	9649035	9892623	2.67711e+06	2.81119e+06	8.0119e+06	7.98453e+06	3.95652e+06	3.6868e+06	9031679	8654233	10521825	10738850	8867999	8964159	6944874	6.12299e+06	7.77149e+06	7483587	8036099	7.85485e+06	6954413	6703365	14451099	14799749	11960090	11929324
CPD-8160	1-18:1-2-16:0-digalactosyldiacylglycerol	368335	365872	355719	358211	314103	302669	308757	305978	258910	254542	244081	249080	346423	336588	360586	372252	261944	238986	232855	249997	235231	233640	233140	235331	242640	265627	241202	243007	297504	296598	405112	383976	251850	250506	260484	257746	262468	240336	258469	251855	300099	289593	302890	306784	310688	294934	370957	373840
CPD-8161	1-18:2-2-16:0-digalactosyldiacylglycerol	2037299	2.09278e+06	1.95826e+06	2.00809e+06	2.01559e+06	1.84913e+06	2.28521e+06	2.2553e+06	2.16364e+06	2.24747e+06	2.18255e+06	2.21372e+06	2.31488e+06	1990202	1.87507e+06	1.94327e+06	1883076	1.89637e+06	1.88953e+06	2145724	2.02492e+06	1.9689e+06	2.08819e+06	2115903	1.7751e+06	2.00849e+06	2.08761e+06	2.04064e+06	2.034e+06	2.00738e+06	2358041	2.33218e+06	1.9962e+06	1.99492e+06	1.9725e+06	1.97996e+06	2.08269e+06	1.79768e+06	2.03571e+06	1.9022e+06	1965152	1.93763e+06	2471555	2371748	2.44598e+06	2.43282e+06	2511364	2.53093e+06
CPD-8162	1-18:3-2-16:0-digalactosyldiacylglycerol	1.40748e+06	1.38006e+06	1.44003e+06	1.49877e+06	1.41792e+06	1.25976e+06	1.93737e+06	1.95124e+06	1.61176e+06	1.63138e+06	1.59145e+06	1.61805e+06	1.52272e+06	1.27694e+06	1.22867e+06	1.2644e+06	1.231e+06	1214714	1343245	1.52438e+06	1.57157e+06	1.42343e+06	1.58836e+06	1.54719e+06	1.42114e+06	1.74338e+06	1.68862e+06	1.63165e+06	1.66675e+06	1.63376e+06	1598885	1.52015e+06	1.35377e+06	1.37412e+06	1.34378e+06	1.33514e+06	1.42562e+06	1.21588e+06	1365604	1.29743e+06	1.27834e+06	1.26972e+06	1667039	1.55881e+06	1.64202e+06	1612148	1.71328e+06	1.63311e+06
CPD-8163	1-16:0-2-18:2-digalactosyldiacylglycerol	2037299	2.09278e+06	1.95826e+06	2.00809e+06	2.01559e+06	1.84913e+06	2.28521e+06	2.2553e+06	2.16364e+06	2.24747e+06	2.18255e+06	2.21372e+06	2.31488e+06	1990202	1.87507e+06	1.94327e+06	1883076	1.89637e+06	1.88953e+06	2145724	2.02492e+06	1.9689e+06	2.08819e+06	2115903	1.7751e+06	2.00849e+06	2.08761e+06	2.04064e+06	2.034e+06	2.00738e+06	2358041	2.33218e+06	1.9962e+06	1.99492e+06	1.9725e+06	1.97996e+06	2.08269e+06	1.79768e+06	2.03571e+06	1.9022e+06	1965152	1.93763e+06	2471555	2371748	2.44598e+06	2.43282e+06	2511364	2.53093e+06
CPD-8164	1-16:0-2-18:3-digalactosyldiacylglycerol	1.40748e+06	1.38006e+06	1.44003e+06	1.49877e+06	1.41792e+06	1.25976e+06	1.93737e+06	1.95124e+06	1.61176e+06	1.63138e+06	1.59145e+06	1.61805e+06	1.52272e+06	1.27694e+06	1.22867e+06	1.2644e+06	1.231e+06	1214714	1343245	1.52438e+06	1.57157e+06	1.42343e+06	1.58836e+06	1.54719e+06	1.42114e+06	1.74338e+06	1.68862e+06	1.63165e+06	1.66675e+06	1.63376e+06	1598885	1.52015e+06	1.35377e+06	1.37412e+06	1.34378e+06	1.33514e+06	1.42562e+06	1.21588e+06	1365604	1.29743e+06	1.27834e+06	1.26972e+06	1667039	1.55881e+06	1.64202e+06	1612148	1.71328e+06	1.63311e+06
CPD-8165	1-18:2-2-18:2-monogalactosyldiacylglycerol	2.44836e+06	2.5922e+06	2520662	2.44797e+06	2.25405e+06	2.22935e+06	1.71625e+06	1.70938e+06	2878118	2.85558e+06	3033438	3.12978e+06	2.59171e+06	2.4629e+06	2.63939e+06	2691125	2512953	2.45833e+06	2.66767e+06	2967781	2863534	2.76138e+06	2675211	2.68007e+06	1.77494e+06	1.86588e+06	3.019e+06	329153	3065021	3.10157e+06	3.05893e+06	285885	2.4932e+06	2416972	271043	253829	1.95457e+06	1816251	192443	201654	172690	2342654	301495	1.89458e+06	2.23505e+06	2.15762e+06	2.55433e+06	2483352
CPD-8166	1-18:2-2-18:3-monogalactosyldiacylglycerol	9178023	9136444	8647718	8491374	9170821	9106143	6646150	6.8151e+06	10542126	10122229	5837319	5742627	9527310	9035215	8833779	8382716	8508435	8504106	9383223	9824766	9648763	9375278	9904489	10006521	7194146	7630531	9552781	9318856	8916344	9024597	9874464	9562751	8.20153e+06	7936208	8683064	8.27981e+06	7.88997e+06	7.22937e+06	7935343	7883336	9003884	8932591	7070580	7.04504e+06	7785472	7959000	8700947	9176293
CPD-8167	1-18:3-2-18:2-monogalactosyldiacylglycerol	9178023	9136444	8647718	8491374	9170821	9106143	6646150	6.8151e+06	10542126	10122229	5837319	5742627	9527310	9035215	8833779	8382716	8508435	8504106	9383223	9824766	9648763	9375278	9904489	10006521	7194146	7630531	9552781	9318856	8916344	9024597	9874464	9562751	8.20153e+06	7936208	8683064	8.27981e+06	7.88997e+06	7.22937e+06	7935343	7883336	9003884	8932591	7070580	7.04504e+06	7785472	7959000	8700947	9176293
CPD-8168	1-18:3-2-18:3-monogalactosyldiacylglycerol	17165608	11640583	10843727	10386516	5664622	12661089	19933776	20011072	6.71877e+06	6.06268e+06	5829756	4945444	11405168	6176555	6345366	6045108	15755791	15794952	18729936	6146832	6.45012e+06	12358711	19058548	6.39631e+06	18671474	18855216	11123773	11233997	19109312	19372632	18153168	11844835	6.19334e+06	5317047	12020446	12081084	15914052	15311323	16356431	16992200	16728381	10455686	16564275	17047390	15815981	15967858	5.30893e+06	15251727
CPD-8178	pheophytin b	1.05755e+06	7.88623e+06	7.90726e+06	1.01503e+06	1.03326e+06	2.23705e+06	9267054	8865335	9132416	9113429	8821551	8941480	970812	945709	911275	1.01647e+06	988749	3.62961e+06	8686414	8820710	346722	342385	263054	8807657	1.70431e+06	1.71084e+06	1.48694e+06	1.46745e+06	1.68211e+06	1.59804e+06	1.0131e+06	954602	471797	463154	1.08344e+06	1.07791e+06	1594660	297634	1.47154e+06	270006	705342	1.97628e+06	1.29636e+06	1.26178e+06	1718360	1.76517e+06	2.21117e+06	2374598
CPD-8186	umbelliferone	550867	526210	55844.9	59610.6	1	1	56243	71734.9	682905	451174	447086	144162	90095.5	253825	332265	518743	573172	578220	560824	799732	990207	1.00736e+06	974093	777502	32318.2	26908.6	40998.2	39814.7	1	1	729112	143981	1.24823e+06	1320579	622820	495957	251677	234444	350006	352043	247090	172944	549640	462202	1.40266e+06	1.41329e+06	1.34949e+06	1.34033e+06
CPD-8230	(-)-&beta;-caryophyllene	10008067	10250409	12130515	13071168	9177101	10182660	5.09701e+06	4965004	7.1737e+06	8.34335e+06	9380539	8891325	11676431	12379546	16091837	16193546	13567948	15169451	8663122	8.34959e+06	9128672	10175257	4798923	7.26119e+06	18550654	15642931	8027599	9404203	17919206	16227334	13125201	13129094	16775499	15338528	16180670	13519722	12654365	15479160	13357180	14510842	10943390	10250724	9170830	9609601	9355079	8966394	10698298	10272175
CPD-8232	(-)-&beta;-elemene	10008067	10250409	12130515	13071168	9177101	10182660	5.09701e+06	4965004	7.1737e+06	8.34335e+06	9380539	8891325	11676431	12379546	16091837	16193546	13567948	15169451	8663122	8.34959e+06	9128672	10175257	4798923	7.26119e+06	18550654	15642931	8027599	9404203	17919206	16227334	13125201	13129094	16775499	15338528	16180670	13519722	12654365	15479160	13357180	14510842	10943390	10250724	9170830	9609601	9355079	8966394	10698298	10272175
CPD-8233	&alpha;-humulene	10008067	10250409	12130515	13071168	9177101	10182660	5.09701e+06	4965004	7.1737e+06	8.34335e+06	9380539	8891325	11676431	12379546	16091837	16193546	13567948	15169451	8663122	8.34959e+06	9128672	10175257	4798923	7.26119e+06	18550654	15642931	8027599	9404203	17919206	16227334	13125201	13129094	16775499	15338528	16180670	13519722	12654365	15479160	13357180	14510842	10943390	10250724	9170830	9609601	9355079	8966394	10698298	10272175
CPD-8239	(<i>E</i>)-&beta;-farnesene	10008067	10250409	12130515	13071168	9177101	10182660	5.09701e+06	4965004	7.1737e+06	8.34335e+06	9380539	8891325	11676431	12379546	16091837	16193546	13567948	15169451	8663122	8.34959e+06	9128672	10175257	4798923	7.26119e+06	18550654	15642931	8027599	9404203	17919206	16227334	13125201	13129094	16775499	15338528	16180670	13519722	12654365	15479160	13357180	14510842	10943390	10250724	9170830	9609601	9355079	8966394	10698298	10272175
CPD-8250	&alpha;-amyrin	1	54620.3	48835.1	50479.3	40340.2	47836.9	43398	41148.8	58515.4	55306.8	98288.8	93634.6	55058.7	56783.3	52432.6	52608.6	1	94201.2	63167.8	55951.4	58761.6	59669.7	46460.7	53100.8	1	62000.2	80373.9	79637.1	111136	108928	1	1	65935.9	66768.3	53597.8	53234.3	53200.3	61762.2	45369.4	52569.9	55185	53569.1	82234	92737.1	77099.7	71944.1	61318.3	59080.8
CPD-8268	dioleoyl phosphatidate	97842.3	1	92647.2	1	1	1	1	1	91279	1	211578	1	96676.4	120259	110277	110450	202447	198365	1	1	125188	135764	89189.4	89009.8	1	112089	152099	148287	219884	232230	145969	132700	161932	158655	118174	114437	1	100782	62553	72150.5	73546.6	1	111287	126627	136924	119265	114806	102581
CPD-862	(+)-camphor	136888	143313	91020.5	107322	77833.5	64912.3	74177.9	59944.8	87154.5	85983.1	149501	149610	104315	101941	95065.2	101845	171449	150146	92038	104115	98706.9	108639	100075	91725.6	107703	128698	133019	121040	165041	186062	153735	153868	142778	148084	126403	115506	143813	115088	109059	102882	142766	123131	157282	134474	123486	128969	150108	129000
CPD-8646	7-dehydrodesmosterol	1	1	201298	214260	105584	112055	36005.8	32466	42887.4	99903.9	64101.7	64123.4	106508	113133	291510	305562	154372	150461	1	1	45503.6	46005.9	35926.3	41545.2	584952	576328	55893.4	53637.7	68773.9	74242.6	1	1	40125.1	41169.4	40540.9	39542.4	1	1	36448.8	41488.7	40912.7	41655.7	60804	61602.7	53072.1	51623.9	42920.2	36336
CPD-8653	betanidin	39464.7	32656.1	24508.9	18044.8	32890	34751.2	17515.7	12130.4	42021.5	50935	25740.5	20463.7	24578.4	31306.2	1	11430.1	35803.8	25095.3	56407.6	46572.5	76392.4	73983.2	48287.7	46013.6	22051.4	10686.6	36613.6	39879.8	70179.3	63302	1	1	50890.8	42015.5	32242.6	30679.7	1	1	1	1	1	1	1	1	1	1	1	1
CPD-8659	miraxanthin V	928444	924276	1.18626e+06	1.20357e+06	637075	628634	206392	209342	801967	654502	1.26771e+06	1.24188e+06	953380	984605	926799	934335	951370	928037	785844	784793	879289	925100	775221	747764	595348	452862	1614321	1.60989e+06	1.00616e+06	971216	1099491	1.13208e+06	862630	990520	803607	816171	698950	690335	793226	793807	1.11563e+06	1.07698e+06	691992	680485	984274	970722	1.47088e+06	1.4872e+06
CPD-8663	&beta;-D-glucosyl crocetin	1	1	1	1	1	1	1	1	1	1	1	1	1	1	1	1	1	1	1	1	1	1	1	1	1	1	1	1	1	1	10710.9	1	1	1	1	1	16099.5	1	24751.9	24655.5	37801.4	35493.4	1	11236.6	25298.2	24378.3	68892.4	77993.9
CPD-8664	&beta;-D-gentiobiosyl crocetin	1	1	1	1	1	1	1	1	1	1	250673	1	1	1	1	1	1	1	1	1	1	223321	1	1	198127	1	292894	297196	281736	1	1	1	1	1	1	1	1	1	1	1	1	1	1	1	1	1	1	1
CPD-8665	&beta;-D-gentiobiosyl &beta;-D-glucosyl crocetin	1	1	1	1	1	1	1	1	15915.8	1	1	15757.4	1	1	1	1	1	1	1	1	1	1	15972.4	11182.7	17991.9	24034	60072.4	55911.1	47465.1	48058.1	10569.9	11080.6	1	1	1	1	73523.4	70071.8	80973.5	86888.5	80298	83429.4	72774.7	77024.9	92012	86238.8	90200.2	97937.8
CPD-8667	bis(&beta;-D-glucosyl) crocetin	1.2556e+06	1.25895e+06	1.41949e+06	1.37153e+06	1.05511e+06	1.0535e+06	114339	117958	259555	253699	308363	312267	1.24356e+06	1.23613e+06	1.22358e+06	1.23493e+06	652462	601753	244615	263646	283136	192755	213054	267367	250614	206844	935895	874780	971621	1.00854e+06	1.2772e+06	1261773	438099	437572	409257	425616	1.22352e+06	1.30757e+06	956517	962627	1.39337e+06	1.32466e+06	1.48422e+06	1.58373e+06	807447	748603	1	1
CPD-8670	portulacaxanthin II	99022.3	95225.8	111331	121131	55641.5	77403.1	17367.1	11325.8	74271.8	57853.4	105876	100726	102528	109675	134207	140716	19844	24114.1	98049.1	94004.3	119966	121767	17767.1	28970.1	200359	177174	11506.9	17616	11674.2	16141.6	117839	16500.8	16522.3	17729.9	161116	155202	12308.2	174264	120393	10889.2	83877.1	10867.7	121138	113050	12048.7	106362	11077.9	11753.2
CPD-8671	dopaxanthin	11130	1	1	1	1	1	1	1	1	11414.6	1	1	1	10777.4	1	1	1	1	18518.2	12531.1	20823.6	20332.2	16747.2	11821	1	1	1	1	18522.5	14418.2	1	1	12163.9	10949.8	1	10610.8	1	1	1	1	1	1	1	1	1	1	1	1
CPD-8674	1-<i>O</i>-(4-coumaroyl)-&beta;-D-glucose	69701.6	1	112056	110656	61087.7	1	1	1	1	47941.9	1	1	78625	86430.7	100749	100994	85164.9	77575.6	77817	75651.9	74514.9	69023.5	1	66276.9	17256.2	1	98076.1	102857	74396	1	76511.9	73549.5	86917.5	95601.5	66706.6	23598.5	86616.6	87092.5	99460.3	98561.9	118813	122258	82262.2	82090.7	109424	108272	123110	122300
CPD-8678	9(<i>S</i>)-HPOTE	56202.8	58504	80892.2	91215.7	62833.2	70085.1	1	1	59402.6	60103.7	84812.2	87101.7	71098.6	66627.2	76944.3	69793.5	100550	102365	65221	58080.3	60016.3	68475.1	61596	71922.8	45098.7	54846.5	100516	105918	113181	110298	74280.2	78003.6	89336.5	95926.9	87728.6	91541	140862	151015	169581	164525	146198	143503	129870	112230	142269	131612	140700	119765
CPD-8679	colneleate	88391.7	79976.5	61581.1	61872.6	42554.3	50342.5	36428.9	26754.1	1	55613.9	101138	98180.9	67518.6	65716.3	71167.5	72667.5	109423	103728	16057.6	24037.1	13956.1	14056.6	11709.4	11893.9	1	70445.8	1	80781	117952	107739	88634.4	84333.6	86906.6	93448	71318.9	74055.6	74929.5	75819.5	69267.2	67790	60758.3	60875.5	83169.1	78519.2	84554.4	81095.1	77998.8	82138.1
CPD-8680	colnelenate	51378	57497.4	67981.3	63769	12010.2	153540	23455.9	1	28618.4	29881.7	68790.3	64913.5	240250	50883.6	54682.8	58509.4	56165.9	54114.6	46471	44229.5	40367.3	46384	29630.4	27326	131044	112107	295516	52928.3	217014	25948.1	61420.3	257405	61517.6	244290	56224.5	55576.2	66923.4	92565.3	130194	107800	175359	153942	53514.8	44752.3	103435	76890.1	158461	147817
CPD-8681	9,10-epoxy-10,12Z-octadecadienoate	88391.7	79976.5	61581.1	61872.6	42554.3	50342.5	36428.9	26754.1	1	55613.9	101138	98180.9	67518.6	65716.3	71167.5	72667.5	109423	103728	16057.6	24037.1	13956.1	14056.6	11709.4	11893.9	1	70445.8	1	80781	117952	107739	88634.4	84333.6	86906.6	93448	71318.9	74055.6	74929.5	75819.5	69267.2	67790	60758.3	60875.5	83169.1	78519.2	84554.4	81095.1	77998.8	82138.1
CPD-8682	9,10-epoxy-10,12Z,15Z-octadecatrienoate	51378	57497.4	67981.3	63769	12010.2	153540	23455.9	1	28618.4	29881.7	68790.3	64913.5	240250	50883.6	54682.8	58509.4	56165.9	54114.6	46471	44229.5	40367.3	46384	29630.4	27326	131044	112107	295516	52928.3	217014	25948.1	61420.3	257405	61517.6	244290	56224.5	55576.2	66923.4	92565.3	130194	107800	175359	153942	53514.8	44752.3	103435	76890.1	158461	147817
CPD-8691	abieta-7,13-dien-18-ol	1	1	1	1	1	1	1	1	1	1	10857.2	39355.1	1	1	1	1	34538.8	17660.1	1	1	1	1	1	1	1	1	23390.7	1	26293.7	25365.9	1	1	1	1	1	1	1	1	1	1	1	1	1	1	1	1	1	1
CPD-8692	abieta-7,13-dien-18,18-diol	25266.2	20092.8	46939.7	53628	18540.5	24254.7	1	1	26923.2	19829.1	55351.6	62858.3	28836	30535.2	31468.1	31189.8	43426.6	40836.2	31407.5	29860.9	29969	30106.7	26394.6	28697.6	10361.3	1	46834.7	50728.3	1	1	42829.4	46058.7	41265.3	39728.5	33982.6	29989.2	36900.5	10557.7	48597.3	52370.8	71720	25249.1	47303.4	50957.6	72526.7	76423.9	1	1
CPD-8693	abieta-7,13-diene-18-al	60055.8	53218.9	28605.2	21934.9	34037.4	28506.6	1	11747.3	10626.6	38272.9	37638.8	37600.2	50661.7	11065	11259.7	48099.3	24763.2	20424.9	18442.5	16966.7	10982.8	11476.3	45385.9	45019.6	45483.3	53849.9	28888.9	28597.1	25719.9	17834.8	20792.7	24419.6	19857.2	25238.6	23015.4	17952.6	33537.7	39054.9	11208.7	11996.9	34133.9	36286.7	39850.9	35231.6	56124.3	20580.3	40295.2	39745.8
CPD-8694	abieta-7,13-diene-18-oate	46786.1	37914.8	60889.6	64815.2	44955.3	42023.4	1	1	28256.8	26877.1	63752.5	56490.3	40048.4	48136.6	56471.1	59001.9	51344.3	46416.1	28496.6	19276.3	31824.7	32698.7	38240.1	43218.4	1	1	67119.9	66767.9	35150	36727.9	63832.4	66001.4	57112.9	57882	48829.7	46708	26692.9	29281.1	34806.4	35483	65467.9	62639.1	33791.9	37775.2	88602.6	88991.5	1	1
CPD-8735	&alpha;-terpinene	93381.3	91920.6	194273	199298	46873.8	53528.7	58958.6	66681.4	62270.1	55622.9	91960.6	93612.2	74675.3	84757.4	88194.8	91882.5	92745	88046.9	55002.4	52855.9	76901	79563.5	122142	126843	76900.3	72956.1	156817	23789.7	117903	123786	110547	104825	95484.9	98713.5	102027	108991	66144.1	66224.4	62024.8	64721.4	89290.8	94484.5	54567.8	47853.5	110745	109047	140348	23313.5
CPD-8744	(<i>E,E</i>)-germacrene B	10008067	10250409	12130515	13071168	9177101	10182660	5.09701e+06	4965004	7.1737e+06	8.34335e+06	9380539	8891325	11676431	12379546	16091837	16193546	13567948	15169451	8663122	8.34959e+06	9128672	10175257	4798923	7.26119e+06	18550654	15642931	8027599	9404203	17919206	16227334	13125201	13129094	16775499	15338528	16180670	13519722	12654365	15479160	13357180	14510842	10943390	10250724	9170830	9609601	9355079	8966394	10698298	10272175
CPD-8745	germacrene C	10008067	10250409	12130515	13071168	9177101	10182660	5.09701e+06	4965004	7.1737e+06	8.34335e+06	9380539	8891325	11676431	12379546	16091837	16193546	13567948	15169451	8663122	8.34959e+06	9128672	10175257	4798923	7.26119e+06	18550654	15642931	8027599	9404203	17919206	16227334	13125201	13129094	16775499	15338528	16180670	13519722	12654365	15479160	13357180	14510842	10943390	10250724	9170830	9609601	9355079	8966394	10698298	10272175
CPD-8746	(-)-germacrene D	10008067	10250409	12130515	13071168	9177101	10182660	5.09701e+06	4965004	7.1737e+06	8.34335e+06	9380539	8891325	11676431	12379546	16091837	16193546	13567948	15169451	8663122	8.34959e+06	9128672	10175257	4798923	7.26119e+06	18550654	15642931	8027599	9404203	17919206	16227334	13125201	13129094	16775499	15338528	16180670	13519722	12654365	15479160	13357180	14510842	10943390	10250724	9170830	9609601	9355079	8966394	10698298	10272175
CPD-8764	(<i>E</i>,<i>E</i>)-&alpha;-farnesene	10008067	10250409	12130515	13071168	9177101	10182660	5.09701e+06	4965004	7.1737e+06	8.34335e+06	9380539	8891325	11676431	12379546	16091837	16193546	13567948	15169451	8663122	8.34959e+06	9128672	10175257	4798923	7.26119e+06	18550654	15642931	8027599	9404203	17919206	16227334	13125201	13129094	16775499	15338528	16180670	13519722	12654365	15479160	13357180	14510842	10943390	10250724	9170830	9609601	9355079	8966394	10698298	10272175
CPD-8767	(+)-camphene	93381.3	91920.6	194273	199298	46873.8	53528.7	58958.6	66681.4	62270.1	55622.9	91960.6	93612.2	74675.3	84757.4	88194.8	91882.5	92745	88046.9	55002.4	52855.9	76901	79563.5	122142	126843	76900.3	72956.1	156817	23789.7	117903	123786	110547	104825	95484.9	98713.5	102027	108991	66144.1	66224.4	62024.8	64721.4	89290.8	94484.5	54567.8	47853.5	110745	109047	140348	23313.5
CPD-8768	(-)-&beta;-phellandrene	93381.3	91920.6	194273	199298	46873.8	53528.7	58958.6	66681.4	62270.1	55622.9	91960.6	93612.2	74675.3	84757.4	88194.8	91882.5	92745	88046.9	55002.4	52855.9	76901	79563.5	122142	126843	76900.3	72956.1	156817	23789.7	117903	123786	110547	104825	95484.9	98713.5	102027	108991	66144.1	66224.4	62024.8	64721.4	89290.8	94484.5	54567.8	47853.5	110745	109047	140348	23313.5
CPD-8809	7-<i>epi</i>-&alpha;-selinene	10008067	10250409	12130515	13071168	9177101	10182660	5.09701e+06	4965004	7.1737e+06	8.34335e+06	9380539	8891325	11676431	12379546	16091837	16193546	13567948	15169451	8663122	8.34959e+06	9128672	10175257	4798923	7.26119e+06	18550654	15642931	8027599	9404203	17919206	16227334	13125201	13129094	16775499	15338528	16180670	13519722	12654365	15479160	13357180	14510842	10943390	10250724	9170830	9609601	9355079	8966394	10698298	10272175
CPD-8843	(3<i>R</i>,6<i>E</i>)-nerolidol	1	1	1	1	1	1	1	1	53295.4	51971.8	131419	86958.6	1	1	1	1	1	1	716614	669587	538146	620648	528676	549046	1	1	30848.8	30776.6	1	1	538183	547120	566314	568556	504916	489803	1	1	1	1	1	1	1	1	1	1	1	1
CPD-8898	17-<i>O</i>-acetylajmaline	1	1	1	1	1	1	1	1	1	1	23162.9	18194.8	10440.4	17909.4	1	1	1	11522.7	10525.4	1	1	1	1	1	1	1	30823.4	30526.3	1	1	23256.1	11529.6	1	11009.7	1	1	1	1	1	1	1	1	1	1	1	1	1	1
CPD-8907	(+)-lariciresinol	1	11224.1	18219.5	19830.7	12573.8	11103.8	1	1	21615.1	20704.4	29085.8	25300.2	17512.4	18951.7	12345.7	12045	20134.9	13702.3	14286	13267.6	21680.9	28826	21357.5	20947.9	1	1	29264	29852.8	27736.9	29282.5	12200.5	19956.6	28787.1	27175.5	27441	19346.4	16551.4	19537.3	13406.7	17652.4	16653.9	11262.4	19091.8	17121.5	49824.6	1	92017.9	98442.8
CPD-8908	(-)-lariciresinol	1	11224.1	18219.5	19830.7	12573.8	11103.8	1	1	21615.1	20704.4	29085.8	25300.2	17512.4	18951.7	12345.7	12045	20134.9	13702.3	14286	13267.6	21680.9	28826	21357.5	20947.9	1	1	29264	29852.8	27736.9	29282.5	12200.5	19956.6	28787.1	27175.5	27441	19346.4	16551.4	19537.3	13406.7	17652.4	16653.9	11262.4	19091.8	17121.5	49824.6	1	92017.9	98442.8
CPD-8909	(-)-secoisolariciresinol	1	1	1	1	1	1	1	1	1	1	1	1	1	1	1	1	1	1	1	1	1	1	1	1	1	1	1	1	1	1	1	1	1	1	1	1	1	1	10739.8	1	1	1	1	1	11380.8	1	1	1
CPD-8910	(+)-secoisolariciresinol	1	1	1	1	1	1	1	1	1	1	1	1	1	1	1	1	1	1	1	1	1	1	1	1	1	1	1	1	1	1	1	1	1	1	1	1	1	1	10739.8	1	1	1	1	1	11380.8	1	1	1
CPD-8911	(3R,4R)-3,4-bis(4-hydroxy-3-methoxybenzyl)tetrahydro-2-furanol	1	11224.1	18219.5	19830.7	12573.8	11103.8	1	1	21615.1	20704.4	29085.8	25300.2	17512.4	18951.7	12345.7	12045	20134.9	13702.3	14286	13267.6	21680.9	28826	21357.5	20947.9	1	1	29264	29852.8	27736.9	29282.5	12200.5	19956.6	28787.1	27175.5	27441	19346.4	16551.4	19537.3	13406.7	17652.4	16653.9	11262.4	19091.8	17121.5	49824.6	1	92017.9	98442.8
CPD-8924	(<i>S</i>)-laudanine	1	11224.1	18219.5	19830.7	12573.8	11103.8	1	1	21615.1	20704.4	29085.8	25300.2	17512.4	18951.7	12345.7	12045	20134.9	13702.3	14286	13267.6	21680.9	28826	21357.5	20947.9	1	1	29264	29852.8	27736.9	29282.5	12200.5	19956.6	28787.1	27175.5	27441	19346.4	16551.4	19537.3	13406.7	17652.4	16653.9	11262.4	19091.8	17121.5	20600.4	21377.9	20331.7	18475
CPD-8942	sinapoyltyramine	59780.2	126650	123592	125014	136549	128258	167114	162910	77720.2	69735.1	137155	73214.6	65209.5	66527.5	58460.4	122799	121975	106054	144450	142625	71561.1	76723.7	144218	73634.1	128959	61023.8	120832	52115.5	71296.7	133180	63296.1	61354.3	133398	68875.7	56166.7	55840.7	54490.3	52630	51834.6	110424	106009	111516	114385	120461	116373	111254	51190.7	113487
CPD-8943	p-coumaroyltyramine	1	1	1	1	1	1	95534.1	98374.2	263827	221325	30695.9	41641	57558.7	57819.3	1	1	1	1	1	1	1	1	1	1	1	1	1	1	1	1	865249	877735	16833.9	17528.6	1	1	134363	137232	109679	113870	191565	172606	927594	908905	2.34117e+06	2334589	2.89337e+06	2971483
CPD-8989	L-methionine-(<i>S</i>)-<i>S</i>-oxide	31481.4	31902.6	70181.5	73045.4	55092.4	40252.8	1	1	47001.5	47605.3	59983	58294.1	39080	33340.3	43435.7	46030.1	92707.8	91337.8	71969.4	72373	65947.6	64410	49832.7	50416.2	64997	59880.8	79472.9	83357.6	93134.3	83271	47751.9	49297.1	73145.9	66668.5	73770.3	64136.6	1	1	1	1	1	1	1	1	1	1	1	1
CPD-8990	L-methionine-(<i>R</i>)-<i>S</i>-oxide	31481.4	31902.6	70181.5	73045.4	55092.4	40252.8	1	1	47001.5	47605.3	59983	58294.1	39080	33340.3	43435.7	46030.1	92707.8	91337.8	71969.4	72373	65947.6	64410	49832.7	50416.2	64997	59880.8	79472.9	83357.6	93134.3	83271	47751.9	49297.1	73145.9	66668.5	73770.3	64136.6	1	1	1	1	1	1	1	1	1	1	1	1
CPD-8996	(3R)-linalool	22881.3	27368.9	1	737692	390741	392322	489818	1	369287	349998	1.69723e+06	1725079	603808	590614	864893	855153	1.03837e+06	1.04065e+06	973880	945468	1	546951	296107	1	2.51961e+06	2.51714e+06	1.15003e+06	1.14297e+06	780795	784895	893369	870730	411894	429137	1	436615	34683.1	37194.6	560427	582634	1	19934.1	708436	56407.3	459382	463870	404716	418187
CPD-8997	(3S)-linalool	22881.3	27368.9	1	737692	390741	392322	489818	1	369287	349998	1.69723e+06	1725079	603808	590614	864893	855153	1.03837e+06	1.04065e+06	973880	945468	1	546951	296107	1	2.51961e+06	2.51714e+06	1.15003e+06	1.14297e+06	780795	784895	893369	870730	411894	429137	1	436615	34683.1	37194.6	560427	582634	1	19934.1	708436	56407.3	459382	463870	404716	418187
CPD-90	lupeol	1	54620.3	48835.1	50479.3	40340.2	47836.9	43398	41148.8	58515.4	55306.8	98288.8	93634.6	55058.7	56783.3	52432.6	52608.6	1	94201.2	63167.8	55951.4	58761.6	59669.7	46460.7	53100.8	1	62000.2	80373.9	79637.1	111136	108928	1	1	65935.9	66768.3	53597.8	53234.3	53200.3	61762.2	45369.4	52569.9	55185	53569.1	82234	92737.1	77099.7	71944.1	61318.3	59080.8
CPD-9004	&beta;-<i>D</i>-apiofuranosyl-(1->6)-<i>D</i>-glucose	103402	57958.9	175525	121765	54663.6	67247.5	12752.7	11865.3	42113.7	56840.4	169425	152455	80794.1	136585	135168	135098	119956	117908	52508.2	47125.3	47444.1	33406.8	44970.7	35033	87203.9	107634	247072	252011	352564	356666	143209	139464	103832	119197	54359.8	98828.9	12076.7	108186	108005	106059	16839.4	119914	55119.9	54269.7	14204	29032	53982.6	60696.1
CPD-9006	(+)-germacrene A	10008067	10250409	12130515	13071168	9177101	10182660	5.09701e+06	4965004	7.1737e+06	8.34335e+06	9380539	8891325	11676431	12379546	16091837	16193546	13567948	15169451	8663122	8.34959e+06	9128672	10175257	4798923	7.26119e+06	18550654	15642931	8027599	9404203	17919206	16227334	13125201	13129094	16775499	15338528	16180670	13519722	12654365	15479160	13357180	14510842	10943390	10250724	9170830	9609601	9355079	8966394	10698298	10272175
CPD-9087	geranylgeraniol	162174	163404	675152	679769	174328	182139	198122	199496	328417	315112	164801	161106	928632	907441	255693	253743	382226	375326	1.70745e+06	1.7491e+06	53388.5	55472.4	1	1	1.05226e+06	1.03685e+06	142708	150512	89084.6	85199.8	1.10558e+06	1.11441e+06	243016	240300	65655.5	64434.3	614971	619069	457060	467173	92948.3	92364.1	1.30435e+06	1.33602e+06	384739	360336	300751	317249
CPD-9211	&alpha;-solanine	11385	1	1	11423.8	27176.1	27630	1	1	1	1	1	1	1	1	1	1	38308.4	34588.3	1	1	1	1	1	1	17666.1	1	38424	36944.2	27786.6	20843.7	1	1	72240	77822.8	47690.1	47872.9	146568	166562	147260	157965	11284.2	17389	279423	288437	64353.4	62746.8	49517.1	54668.7
CPD-9212	&beta;-solanine	24538.6	31175.5	181321	183160	67279.9	61163.6	1	1	30312.7	33094	92649.5	93959.2	92121.9	88273	83342.1	84726.2	53723	53613.8	29770.2	35265.8	58697.5	54140.2	19705.8	12587.8	11198.8	16011.6	150479	139403	142023	132163	61551.9	49309.7	64002.1	69982	74893.6	74568.8	116969	112927	93516.2	92904.2	123605	126049	97393.9	97566.4	137323	134617	196189	177944
CPD-9213	&gamma;-solanine	186422	105707	115771	142702	243682	88656.5	38132.5	44010.4	130905	146222	245952	1	57119.7	175537	75656.1	78644.5	308743	299674	183488	19426.3	341750	357122	279122	295567	224306	22059.5	366657	384914	111260	554842	237055	232458	274397	16512.1	356657	389204	1	93346.7	127218	107160	229915	226930	126377	96451.1	82784.8	173643	135596	146007
CPD-9214	&alpha;-chaconine	1	1	1	10357.9	1	1	1	1	1	1	1	1	1	1	1	1	1	1	1	1	1	1	1	1	17666.1	1	43587.2	42018.8	27786.6	20843.7	1	1	1	1	1	1	79754.7	98801.3	64775.5	61997.9	11284.2	17389	259142	270978	35932.7	31963.6	54737.7	64873.8
CPD-9215	&beta;-chaconine	1	1	1	1	1	1	1	1	1	1	1	1	1	1	1	1	1	1	1	1	1	1	11094.4	16371.6	1	1	102036	87860.8	661410	656769	12077.6	1	1	1	1	1	156462	1	182837	178576	139893	140743	1	134302	1	1	125419	126731
CPD-9216	&gamma;-chaconine	186422	105707	115771	142702	243682	88656.5	38132.5	44010.4	130905	146222	245952	1	57119.7	175537	75656.1	78644.5	308743	299674	183488	19426.3	341750	357122	279122	295567	224306	22059.5	366657	384914	111260	554842	237055	232458	274397	16512.1	356657	389204	1	93346.7	127218	107160	229915	226930	126377	96451.1	82784.8	173643	135596	146007
CPD-9217	solanidine	71687.4	1	50348.2	52835	55024.2	60916.3	1	75078.4	1	63027.7	98115.9	102020	49628.1	68487.2	60425.5	58617.3	1	102398	69746.1	57941.3	1	1	57532.9	59681.3	117487	87992.6	78712	1	139560	142542	70247.7	1	70767.6	63730.8	65439.3	60841.7	60699.6	72577.1	55768.3	58241	55534.9	57318.7	146376	81840.9	181554	180619	54438.6	46409.8
CPD-9240	dammarenediol II	1.26141e+06	1.26822e+06	1.08345e+06	1104347	1	810317	738477	762379	1	1.03708e+06	1.77429e+06	1.73197e+06	1196457	1156419	1	1188683	1.70029e+06	1.64644e+06	1.1558e+06	1195172	1227360	1.25034e+06	1.01051e+06	999684	1.26248e+06	1.29945e+06	1.50338e+06	1.54724e+06	1.86014e+06	1851551	1.3882e+06	1.35813e+06	1.47484e+06	1.49315e+06	1.26664e+06	1246791	1.45789e+06	1.38071e+06	1.21491e+06	1.20002e+06	1.18205e+06	1.16752e+06	1.36382e+06	1.40496e+06	1.44163e+06	1.42684e+06	1.40675e+06	1.40236e+06
CPD-9245	palmitoleate	1	1	12262.8	10792.5	1	1	1	1	1	1	15759.3	22205.3	1	1	1	1	1	1	1	1	1	1	1	1	1	1	18427.5	18778	1	1	10630.4	1	1	1	1	1	1	1	1	1	10525.2	37992.7	1	10692.3	33224.1	40203	1	32454.7
CPD-9247	<i>cis</i>-vaccenate	155883	142871	64604.8	179328	123683	67339.7	59104	49263.9	119525	105965	192961	201562	136230	139150	157128	157445	148334	143996	45693.3	135369	148023	159758	48715.4	140044	53506.6	80182.7	186963	187131	132989	51734	74608.7	63741.1	165994	161332	136772	132226	129789	139166	137769	136063	180828	186189	55951.6	48811.8	217970	210871	262921	276631
CPD-9338	(Z,E)-&alpha;-farnesene	10008067	10250409	12130515	13071168	9177101	10182660	5.09701e+06	4965004	7.1737e+06	8.34335e+06	9380539	8891325	11676431	12379546	16091837	16193546	13567948	15169451	8663122	8.34959e+06	9128672	10175257	4798923	7.26119e+06	18550654	15642931	8027599	9404203	17919206	16227334	13125201	13129094	16775499	15338528	16180670	13519722	12654365	15479160	13357180	14510842	10943390	10250724	9170830	9609601	9355079	8966394	10698298	10272175
CPD-9370	(+)-germacrene D	10008067	10250409	12130515	13071168	9177101	10182660	5.09701e+06	4965004	7.1737e+06	8.34335e+06	9380539	8891325	11676431	12379546	16091837	16193546	13567948	15169451	8663122	8.34959e+06	9128672	10175257	4798923	7.26119e+06	18550654	15642931	8027599	9404203	17919206	16227334	13125201	13129094	16775499	15338528	16180670	13519722	12654365	15479160	13357180	14510842	10943390	10250724	9170830	9609601	9355079	8966394	10698298	10272175
CPD-9410	(+)-costunolide (12,6&alpha;)	20899.9	25120.7	21807.5	25103.7	28191.9	30015.7	15943.1	26535	36876.6	32833	34318.2	24671	25118.6	28938.7	32838.1	20839.4	40742.6	25733	35451.5	28604.3	30786.6	42313.7	37629.5	49390.7	108984	1	233070	240696	169335	171159	10531.9	31045.5	1	1	29511.2	24241.6	12214.6	19205.2	115686	52972.9	161525	151662	51859.6	130699	266647	258037	401708	446724
CPD-9412	germacra-1(10),4,11(13)-trien-12-al	201543	77592.4	282613	295717	48524.7	160920	58419.6	62502.4	1	195562	1	1	59685	247300	294251	1	258611	79042.2	1	1	87880.4	66743.9	61764	84415.8	128798	70850	330203	338116	342001	97791.4	343142	330904	68674.2	75542.9	220160	64003.5	642734	593118	645594	71188.1	461682	450260	73209.9	71121.3	539336	550808	388211	381700
CPD-9413	germacra-1(10),4,11(13)-trien-12-oate	1	1	13253.4	26871.3	1	1	1	1	1	1	1	1	1	1	1	11904	1	1	1	11077.3	17203.5	1	1	1	95493.4	87788.8	29839.8	22399.1	11414.7	19048.6	1	1	1	11430.8	11780.4	12976.7	1	1	1	1	1	11877.1	1	1	29271.7	24222.6	48852.3	18900.6
CPD-9451	2-isopropylmaleate	81004.1	85881.3	49318.5	46022.9	36999.2	33238	1	1	1	1	1	1	17508.5	23562.5	30001	33845.7	22413.4	11267.4	10170.2	1	1	1	1	1	1	1	1	1	1	1	1	1	1	1	1	1	1	1	1	1	1	1	1	1	1	1	1	1
CPD-9459	oleanolate	13305059	13253397	11407309	11648771	9158257	8550569	7660979	7.9137e+06	10139342	10694174	16847532	16313521	12786426	11806642	11978053	12134887	16111192	16092937	11320679	12532653	12010087	12023634	10579291	10307648	11987986	13248945	14844457	14873165	16402924	16339866	13881829	13856681	14205187	14575644	12840814	12335752	16430594	14485590	14698961	14471452	14196542	14161371	14766343	14305491	14929308	15094090	15329547	15363659
CPD-9494	3,5-dihydroxyanisole	428841	429264	76541.6	59610.6	1	1	65338.7	35284.4	682905	297715	613163	425141	145352	66894.8	528806	329991	541401	528191	560824	799732	990207	1.00736e+06	974093	777502	32318.2	26908.6	40998.2	39814.7	1	1	377123	256663	1.24823e+06	1320579	514700	616772	251677	234444	350006	352043	247090	172944	549640	77750.5	1.40266e+06	1.41329e+06	1.34949e+06	1.34033e+06
CPD-9499	3,5-dimethoxyphenol	189796	1	191644	186579	174586	175586	54479.7	154695	181665	165961	185959	172462	187617	188868	174734	196276	181957	172853	159633	176507	1	141194	194365	187265	176593	177759	183406	168657	188535	11105.4	166323	1	168650	177481	167802	183956	198836	187122	191970	209918	194797	197819	198693	186104	183597	437456	1	197422
CPD-9500	1,3,5-trimethoxybenzene	73408.5	16163.6	44674.4	42935	60628.1	65589.6	1	1	26665.1	30084.7	12363.9	17618	49728.6	49816.4	49624.2	59782	41040	46522.6	38205.4	31174.4	27139.6	25153.4	11137.9	19973.4	12351.9	15826.5	18004.7	17900.5	27759.6	26247.5	23908.1	23650.7	39372	39053.9	38214.3	34750.1	1	1	1	1	1	1	1	1	1	1	1	1
CPD-9502	3,5-dimethoxytoluene	65027.5	64083.2	33570.8	36294.5	24474	17236.1	1	1	1	1	1	1	10381	10351.4	22786	18150.8	1	1	1	1	1	1	1	1	1	1	1	1	1	1	1	1	1	1	1	1	1	1	1	1	1	1	1	1	1	1	1	1
CPD-9539	calycosin	1	1	1	1	1	1	1	1	1	1	1	1	1	1	1	1	1	1	1	1	1	1	1	1	1	1	11413.7	17915.6	1	1	1	1	1	1	1	1	1	1	1	1	1	1	1	1	1	1	1	1
CPD-9582	(indol-3-yl)acetyl-L-phenylalanine	34223.4	33459.6	40746.1	48950.3	24846.9	25480.6	1	1	11031.4	16482.5	25907.6	24820.8	30914	42488.4	36006.5	37307.8	41094.5	44475	26018.8	19516.2	11883.5	12552.5	1	12486.7	1	1	13924.9	25254.1	16878.6	16482.7	19518.3	19196	33442.4	38530.8	35319.7	27674.2	12591.5	1	11534.6	1	1	10189.2	1	1	1	1	11345.5	11752.2
CPD-9603	<i>N</i>-[&beta;-glucosyl-(1,4)-&beta;-glucosyl]-(oxindol-3-yl)acetyl-aspartate	56008.4	49342.2	37946	45568	34752.1	27446.7	65128.2	62635.4	39780.1	42564.1	73164.2	76143.4	57194.7	56590	45151.6	49460.4	71964.8	78284.9	38406.9	47956.2	48353.3	46202.6	49071	54247.9	69023	76213	70795.3	71075	82851.5	83008.3	66801.4	57012.5	62229.3	70955	48547.9	42171.8	72984.4	70674.7	70118.3	73877	56447.6	52771	73696.4	73722.1	69341.2	68231.4	61532.8	57315.2
CPD-9639	hydratedusnate	329294	327968	399841	410971	266797	262010	147454	142649	277573	278698	302355	303013	366155	373292	420295	424739	424248	416015	243320	239302	234958	219585	252357	261733	168348	172547	287225	285698	195609	197285	502527	509274	378172	387244	403643	399331	203256	192852	205659	199414	212982	211769	219940	220381	351356	351239	240910	230373
CPD-9758	geranyl acetate	1	1	1	1	1	1	1	1	40183	41020.3	81819.6	71297.6	1	1	1	1	1	1	349532	341984	299731	314090	262247	266201	1	1	1	1	1	1	55896.7	52744.5	168211	81034.7	147230	146688	1	1	1	1	1	1	1	1	1	1	1	1
CPD-9762	neral	136888	143313	91020.5	107322	77833.5	64912.3	74177.9	59944.8	87154.5	85983.1	149501	149610	104315	101941	95065.2	101845	171449	150146	92038	104115	98706.9	108639	100075	91725.6	107703	128698	133019	121040	165041	186062	153735	153868	142778	148084	126403	115506	143813	115088	109059	102882	142766	123131	157282	134474	123486	128969	150108	129000
CPD-9775	methyl ecgonone	300358	297212	286198	308299	321661	333721	310042	316904	293213	294555	272468	287440	301326	290631	295603	289633	297870	267771	263851	259931	303908	324045	312561	306668	263589	259102	266079	271044	287023	275369	295009	284583	290970	301978	314506	326936	257412	268897	257984	263835	250760	260743	278800	287555	244674	247904	228592	212543
CPD-9777	ecgonine methyl ester	53304.8	59718.7	64648.5	61729.1	33752.1	31320.7	75937	75224.6	55845.1	54101	41894.1	42617.8	82089	82008.5	89362.1	1	94478.1	78401.4	267572	274507	55832.2	48343.7	1	26121.7	220125	505589	124312	290272	68172.4	1	190452	94726.9	47433.2	46143.1	62972	54221.8	222561	213287	244380	232162	52354	54932	304275	305675	128272	128034	1	1
CPD-9875	coniferyl acetate	1.09623e+06	1.02438e+06	2.74899e+06	2.63682e+06	1.11068e+06	1.18571e+06	1.19367e+06	1.17836e+06	1.15957e+06	1.10881e+06	1.03076e+06	1.05755e+06	1.03579e+06	1107540	2.71972e+06	2.75507e+06	1.07116e+06	2.16656e+06	1.05031e+06	1.09121e+06	1.18395e+06	1.16551e+06	1.20013e+06	1.23152e+06	1.14396e+06	1.13645e+06	1.52712e+06	1.51825e+06	1.08711e+06	1080206	1.77065e+06	1759171	977982	1.14324e+06	1.15452e+06	1.13714e+06	1.05889e+06	1.09097e+06	1026850	990930	1.01603e+06	1.00989e+06	1118892	1.08993e+06	900226	1.00324e+06	3.97601e+06	914981
CPD-9893	chelirubine	53722.4	52555.5	12369	1	43300	39340.8	11713	10781.1	10677	11291.7	16516.7	10984.3	19703.8	14230.3	1	1	1	1	1	10387.8	17250.2	10599.6	10738	16200.9	46301.6	17345.3	1	1	21234.9	15271.7	1	1	31007.6	11657.3	14377.3	18956.5	53521.7	59936.5	50143.7	44300.6	32422.4	29920.6	73698.5	70538.6	63004.2	64772.9	12745.6	18578.5
CPD-9935	(S)-corytuberine	490906	472923	544348	555560	265200	257810	81728.5	80461.8	352660	300402	584396	577107	434307	445169	482486	492227	458201	443894	432510	414358	427108	436086	363051	359327	211005	1	1	1	1	317797	515453	507016	526693	549061	475044	465881	128321	135657	138910	143170	192793	189228	125869	126293	148656	141487	215398	206794
CPD-9956	ubiquinol-<i>8</i>	303737	319284	262249	270647	195573	6452494	180762	179930	283435	261250	467306	461622	292277	298238	280287	289150	424100	420908	303651	293630	308897	310812	240652	238594	329672	321614	365137	350173	446563	441893	332151	10389670	360811	11737093	292305	9738446	11884430	276696	10458467	10136853	227054	9981370	358469	377218	360014	338174	11451363	283693
CPD-9978	(6<i>E</i>)-8-oxogeranial	60532.2	57261.1	63122.5	68945.6	24131.7	29322.7	1	1	33495.7	39981.6	72620.3	67970.3	44107.6	45596.5	69672.7	66633.5	50959.6	48784.2	37274.8	31884.6	36982.8	40375.7	38736.6	43105.9	1	1	82847	83328.7	61795	60487.4	60978.6	61645.3	44791.1	44381.9	60291.6	56278.6	1	1	1	1	17388.8	11544.3	1	1	17473.7	12474	56110.6	55203.5
CPD-9980	7-deoxyloganetate	23146.8	18282	10585.2	10310.6	1	1	1	1	1	1	1	1	16139.6	15746.8	48227.8	48105.7	1	1	1	1	1	1	1	1	1	1	1	1	1	1	29477	28203.7	1	1	1	1	14123.9	14085.1	14095.3	14030.4	17846.5	21493.5	1	11649	1	1	30118.8	31610.8
CPD-9981	7-deoxyloganate	385845	379960	277978	269773	340700	324421	322816	297662	212600	205940	172644	170998	266684	283229	259937	276696	274528	262534	187127	202476	189027	192701	225415	239973	252109	276076	185686	178876	189497	189540	288179	279909	321803	303520	329238	320692	285506	285018	289300	309559	313864	307516	361483	355123	436325	384866	192439	187630
CPDMETA-13651	perakine	45264	54434.1	73043	70255.3	1	25949.6	1	1	29032.5	25652.6	45404.9	46117	52692.7	71904.2	57971.9	52251	61633	58993.1	27907.8	22450.6	35134.6	30505.5	21785.2	21777.5	19819.1	20256.7	20682.2	19198.9	29218.4	28112.2	91021.4	87739.7	55512.3	67209.7	48554.3	54021.4	22823.2	28764.7	26612.8	30483.4	60465.5	54323	32838.1	29995.4	51483.8	54416.3	93444.2	85590.3
CPDMETA-13652	raucaffrinoline	1	1	764053	775541	507933	73090.9	193279	200912	194564	209378	200813	201547	861418	893273	705744	188801	842547	832886	230759	206402	247166	234726	205914	228828	650937	594388	1.23939e+06	1.23448e+06	782649	775395	1	1	856458	861286	764926	772259	1	1	572421	550712	761757	741180	630516	646992	837865	846000	1.07082e+06	138464
CPDQT-296	7-(methylsulfanyl)heptyl-glucosinolate	1	1	1	1	1	1	1	1	1	1	1	1	1	1	1	1	1	1	1	1	1	1	1	1	1	1	11346.2	10709.2	11278.2	1	1	1	1	1	1	1	1	1	1	1	1	1	1	1	1	1	1	1
CPDQT-299	8-(methylsulfinyl)octyl-glucosinolate	21516.3	6518.11	48365.3	30674.8	16232.1	22666.8	1	1	10741.5	1	21858.4	10996.1	31243.8	32014.5	40647.1	42118.7	31728.3	40225.4	1	1	1	11260.1	1	10770.8	1	1	1.08272e+06	1.18193e+06	1	679641	62043.5	64349.5	31082.2	25152.4	29637	24015.6	1	1	517513	543848	796229	784254	1	1	606774	610011	1.26604e+06	1.35696e+06
CPDQT-300	8-(methylsulfanyl)octyl-glucosinolate	131788	111352	161807	156335	84344	93135.4	1	1	108382	89986	139306	102138	137060	140784	122565	134516	174188	183696	83469.6	80956.6	148027	143483	103013	99620.4	32849	25782	112608	124487	85153	91256.4	210469	215594	216235	182238	143730	148641	1	1	1	1	1	1	1	1	1	1	1	1
CPDQT-326	(<i>22R,23R</i>)-28-homobrassinolide	60192.8	68453.7	23814.9	11167.8	11239	18005.6	151460	168705	41369.7	35957.5	1	1	251030	234705	31195.9	30216.2	46301.1	43176.9	80465	86310.9	70085.8	63330.1	50846	49057.8	1	244373	1	328352	55018.8	464015	11478.6	11652.9	76204.4	79427.3	39446.3	33588.2	18143.1	1	11413.5	17482.1	34820.7	1	23017.8	23631.7	1	275421	12263.2	17189.2
CPDQT-412	(<i>E</i>)-&omega;-(methylsulfanyl)hexyl-thiohydroximate	34536.4	25345.7	24050.8	21090.1	20057.7	19212.9	1	1	1	1	1	1	12218.6	13285.3	1	17598.7	11900.5	1	1	1	1	1	1	1	1	1	1	1	1	1	1	1	20851	13256.4	11791.7	1	1	1	1	1	1	1	1	1	1	1	1	1
CPDQT-413	(<i>E</i>)-&omega;-(methylsulfanyl)heptyl-thiohydroximate	1	99861.2	103839	100492	1	99571.4	93165.2	94741.3	108069	121755	105568	107245	100856	109007	117133	113509	1	1	107712	101434	109545	114248	86110.9	85297.2	137471	1	1	91096.7	123499	1	1	93913.2	1	1	117353	1	107889	108096	92152.1	94373.6	1	1	1	1	89028.6	87007.6	78853.2	90815.4
CPDQT-458	2-<i>R</i>-hydroperoxy-linolenate	11834.1	18776.2	1	1	1	1	1	1	12256.9	1	35614.8	30221.8	11197.9	16952	1	1	22683.7	26123.6	17140.4	1	17391.5	17081.6	10878.9	11207.3	18670	18176.6	20534.8	20560	27146.5	29175.1	13628.1	12636.5	20137.2	20028.9	11414.8	17067.7	10328.3	18807.6	10953.1	10474.7	1	10977.5	21154.3	20021.8	18243.1	19364.8	18521.9	12658.1
CPDQT-522	castasterone-23-O-glucoside	1	161606	1	1	1	1	1	1	1	1	1	1	1	1	1	1	1	1	1	1	1	1	1	1	1	1	1	1	1	1	1	1	237623	219607	184924	172450	1	1	1	1	1	1	1	1	1	1	1	1
CPDQT-523	brassinolide-23-O-glucoside	59306.2	61610.3	123844	133479	40618.3	36840.3	1	1	12944.1	11586.3	58782.8	55098.7	55755.6	48240.1	70597	66823.6	36688.3	36431.5	22345.5	21202.5	22968.1	23216.3	22376.7	21449.7	1	1	24844	22554.6	12076.6	11999.4	127164	119430	35973.3	37389	35855.9	33509.4	32254.4	31173.1	37716.3	41015.2	132330	124778	29990.1	31315.5	53238.7	44501	139063	139608
CPDQT-8	hamamelose	820412	878758	1.25882e+06	1.22293e+06	310300	65275.3	47496.3	26202.3	2134499	985698	107029	907661	1.14597e+06	639575	1.17112e+06	1.20168e+06	1.01073e+06	987522	296172	249093	268654	180608	132094	186752	81539	127229	1	133984	132312	119542	407991	519398	388860	31467.5	350478	353424	1167135	1.00522e+06	1.04997e+06	961638	1099263	1.07598e+06	1.39765e+06	1.39441e+06	1.36252e+06	1.41268e+06	1.58136e+06	1.51725e+06
CYCLOARTENOL	cycloartenol	1	54620.3	48835.1	50479.3	40340.2	47836.9	43398	41148.8	58515.4	55306.8	98288.8	93634.6	55058.7	56783.3	52432.6	52608.6	1	94201.2	63167.8	55951.4	58761.6	59669.7	46460.7	53100.8	1	62000.2	80373.9	79637.1	111136	108928	1	1	65935.9	66768.3	53597.8	53234.3	53200.3	61762.2	45369.4	52569.9	55185	53569.1	82234	92737.1	77099.7	71944.1	61318.3	59080.8
CYCLOEUCALENOL	cycloeucalenol	1	54620.3	48835.1	50479.3	40340.2	47836.9	43398	41148.8	58515.4	55306.8	98288.8	93634.6	55058.7	56783.3	52432.6	52608.6	1	94201.2	63167.8	55951.4	58761.6	59669.7	46460.7	53100.8	1	62000.2	80373.9	79637.1	111136	108928	1	1	65935.9	66768.3	53597.8	53234.3	53200.3	61762.2	45369.4	52569.9	55185	53569.1	82234	92737.1	77099.7	71944.1	61318.3	59080.8
CYSTINE	L-cystine	1682134	1.68007e+06	2.19682e+06	2.18131e+06	1.18398e+06	1.1939e+06	392774	385361	1.3423e+06	1.36279e+06	1.84182e+06	1.80111e+06	1.97711e+06	2.01317e+06	2.64348e+06	2.66085e+06	2.16465e+06	2.09213e+06	1.29522e+06	1.28904e+06	1.12768e+06	1.18225e+06	994585	1.0479e+06	613095	629448	1.45465e+06	1.51746e+06	1.02843e+06	1.03796e+06	2274110	2.26879e+06	1870337	1.82886e+06	1.71575e+06	1.69296e+06	104671	359022	504944	121119	183039	158922	347947	347043	186943	171110	158110	171784
DADP	dADP	101692	90341.7	38723.7	38739.1	48756.3	46675	1	1	1	1	1	1	16746.5	17383.1	17659.4	22590.9	10878.2	1	1	1	1	1	1	1	1	1	1	1	1	1	1	1	1	1	1	1	1	1	1	1	1	1	1	1	1	1	1	1
DAIDZEIN	daidzein	1	1	1	1	1	1	1	1	1	1	1	1	1	1	1	1	1	1	144944	144364	138376	133544	114248	103704	45484.8	41122.6	143433	151264	153959	161005	1	1	1	1	1	1	1	1	1	1	1	1	1	1	1	1	1	1
DEACETOXYVINDOLINE	deacetoxyvindoline	1.19759e+06	1.2126e+06	913266	918326	471304	458807	1.26249e+06	1.33504e+06	743581	736364	1.65901e+06	1642055	1.29018e+06	1.25887e+06	997752	998630	1.20886e+06	1.17098e+06	1.83876e+06	1	619616	638129	347249	343632	2.21098e+06	2.2077e+06	502631	487824	683724	667361	1.63873e+06	1.17694e+06	849512	862894	422757	415251	1.06819e+06	1029597	1.14868e+06	871420	421555	417978	1.44496e+06	1.48226e+06	1085117	1071625	792704	751471
DEHYDROSPHINGANINE	3-dehydrosphinganine (C18)	212137	214422	28354.2	1	1	1	1	1	14070.5	11541.6	49095.5	47218.7	1	45775.2	19626.7	19982.3	44061.5	37545.3	100548	94443.2	1	1	1	1	86443.7	82162.9	1	1	1	1	215481	202375	19682	1	1	1	212952	198356	26529.1	20532.6	1	1	47632.5	48114.6	1	1	10648.5	1
DELTA1-PIPERIDEINE-2-6-DICARBOXYLATE	(<i>S</i>)-2,3,4,5-tetrahydrodipicolinate	1	1	1	1	1	1	1	1	1	1	1	1	1	1	1	1	1	1	1	1	1	1	1	1	1	1	1	1	1	1	1	1	1	1	1	1	111135	115756	122737	132775	149283	145954	109478	115569	92700.6	94631.3	137863	124932
DELTA1-PIPERIDEINE-2-CARBOXYLATE	1-piperideine-2-carboxylate	26218.7	27582.9	19087.9	12290	1	1	1	1	19323.1	1	38658.9	36499.8	25281	13999.7	19482.2	27055.3	50696.9	38967	18563.6	12221.1	17996.8	1	11605.4	17229.1	41329.6	26248.4	45682.2	38840.8	50880.6	47955.8	21930.7	19826.5	30651.2	30128.8	20913.6	25518	11633.1	17372.9	1	1	18824.3	12157.3	21751.3	26306.8	21418	31040.4	22154.5	34054.8
DELTA3-ISOPENTENYL-PP	isopentenyl diphosphate	32261	29790.2	34080.4	33832.6	29057.6	27835.8	1	1	16671.9	22353	34879.6	29251.7	30912.4	32305.3	30915	33962.3	26067	20682.4	23448.5	19294.1	32103.3	21746	28885.5	18103.2	1	1	28621.8	30493.3	21777.6	16608.2	34687.8	34685.2	32025.8	25142.3	18131.7	25688.1	17686.8	16568.5	11353.6	11669.9	1	18209.4	18031.9	17410.6	17579.4	23439.5	26524.2	20608
DELTA-TOCOPHEROL	&delta;-tocopherol	79316.1	1	71034.6	1	34369.8	1	11293.8	33313.5	1	1	156217	160571	1	54921.1	1	1	1	18109	1	1	1	1	1	1	1	1	1	1	1	113523	1	1	1	1	1	1	49746	75833.7	1	1	1	1	78379.9	1	1	71684.2	79951.6	1
DEOXYADENOSINE	2'-deoxyadenosine	35661.8	29409.6	1	1	1	1	1	1	1	1	1	1	1	1	1	1	1	1	1	1	1	1	1	1	1	1	20645.8	19879	17030.4	12257.1	1	1	1	1	1	1	1	1	1	1	1	1	1	1	1	1	1	1
DEOXYGUANOSINE	2'-deoxyguanosine	2.42906e+06	2.45347e+06	2.66166e+06	2.53276e+06	2.00033e+06	2.00659e+06	954194	954034	482948	475705	889542	907318	1.33437e+06	1.37915e+06	2.14742e+06	2.22393e+06	945659	941387	478679	1	574135	566420	503827	499421	1.38095e+06	1.33367e+06	2.19694e+06	2140703	4.34107e+06	4317624	1.53109e+06	1.51583e+06	919374	889627	867119	872361	1.29297e+06	1.23965e+06	1.24172e+06	1.24442e+06	1709707	1.72852e+06	887551	920985	1.47044e+06	1.39364e+06	1.75545e+06	1.76503e+06
DEOXYXYLULOSE-5P	1-deoxy-D-xylulose 5-phosphate	84608.8	83644.3	84433.4	77319.9	82064.4	82873.6	1	1	81257.7	72470.5	87051.8	1	80651.1	82994.2	72164.5	77171.3	78204.3	79624.1	1	88696.6	1	1	86320.6	1	71095.7	58262.7	78513.6	78833.3	69328.9	70405.4	79913.3	81980.8	84920	80058.3	78129	70074.4	58508.9	57973.8	52587.8	55715.1	52677.2	55048.5	58831.3	64869.3	59371.7	62004.8	62456.9	62207.9
D-ERYTHRO-IMIDAZOLE-GLYCEROL-P	D-erythro-imidazole-glycerol-phosphate	70431.5	12082.4	53242.9	57604.6	22198.8	59575.6	57662.3	41478.4	54168	41086.6	77975.4	64749.2	30171.7	71284.9	73978.6	77542.2	65759.7	53425.4	72783.4	22913.9	81504.4	86556.9	51827.3	17329.2	87971	62273.3	11410.9	38253.1	92073.8	75216.1	35296.4	32843.7	42022	24220.6	83638.8	29624.5	17379.5	34697.1	39467	33834.2	12308.4	11482.8	48190.9	65051.7	28418.6	11426.8	17231.7	11459.2
DESMOSTEROL-CPD	desmosterol	1	1	37461.2	33256.8	19338.1	20033.6	20158.5	20059.6	23768.6	29386.3	55811	55730	39870.3	32108.7	30045	32812.1	52834	51578.8	29171.6	1	33402.7	34489.8	28460.7	29768.7	30770.9	31823.3	49270.1	48980.8	63874	63944.7	1	1	50378.8	51453.3	43122	35776.3	1	126516	35777.5	37123	38704.7	36268.4	17373.6	42166.3	47649.4	47779.2	46716.8	46560.1
D-GLUCARATE	D-glucarate	113098	113575	110594	117658	111775	105395	114172	105686	119169	115734	114417	113244	103700	113199	119673	113589	109473	114088	127231	115705	129222	131221	95813.7	93317.5	145156	143610	88812.8	1	131649	1	104369	105284	129996	125134	128288	124952	136720	134470	116259	117421	99683.9	98090.3	124465	118825	109790	116344	100778	100074
DIACETYL	diacetyl	835743	827437	827414	852999	832376	851069	443617	321372	685532	688807	777812	767539	750232	781411	809752	819796	772647	754568	697580	655588	694700	708807	713118	710716	744837	712287	941192	951644	865509	862955	808605	792282	813814	808855	709391	683087	714833	1	728734	452063	837983	817754	826495	776335	999156	976567	1.03744e+06	1.06075e+06
DIFLUOROMETHYLORNITHINE	difluoromethylornithine	38038.4	40038.4	33119.9	32328.5	37974.5	28904.8	31994.5	31632.4	35592.6	37389.4	41424.6	38924.5	48581.9	37351.3	36593.6	38539.3	40469.4	38956.1	29513.1	41722.8	32608	39165.1	35380.3	39032.9	39420.2	28309.4	48790.9	38718.5	38163	36806.5	38970.2	30919.5	35067	41077.8	37962.4	37306.6	50062.8	48185.3	49402.3	41452.1	38205.4	39815.3	48713.6	48746.7	50716.2	47493.2	48612	40947.3
DI-H-OROTATE	(<i>S</i>)-dihydroorotate	37749.6	39405.1	37927.8	39948.4	25973.2	26907.4	1	1	26931.6	19752.1	30823.8	37793.6	39060.6	31361.1	29858	31953.9	27165.6	28120	27914.6	28631.4	28119.3	24352.7	27037.3	27245	11645.8	1	36611.6	29962.5	18958.8	19743.8	42381.9	40846.4	34629.3	36953.2	27396.7	21255.5	38207.7	26953.3	29802	34087.8	29687.7	28101.7	26677.6	26999.7	34739.3	27890.3	30299	29516.7
DI-H-URACIL	5,6-dihydrouracil	11373.1	37792.6	24610	12164.1	15176.7	1	18389.9	11196.4	18696.4	22744.8	1	19850.6	9561.27	31052.2	1	19731.6	1	13019.8	1	23426.3	47965	17030.5	25759.8	16548.6	20732.9	24523.5	24944.6	26466.2	1	1	23251.6	34303.5	1	16022.2	10845.4	10459.5	29727.6	11578.9	18691.2	17664.1	63446.3	24244.5	18280.1	11721.7	23535.6	97604.5	1	12439.3
DIHYDRO-NEO-PTERIN	7,8-dihydroneopterin	869760	631713	758012	732640	815579	851834	168507	161917	454980	466568	417839	422162	692839	730692	803594	861032	675118	681117	542471	537924	440947	710008	568833	702588	344472	1	433837	1	530245	428470	522061	517059	655976	631936	598805	316291	269321	346479	1	290393	271972	283120	168375	180359	156739	108712	93584.2	100158
DIHYDROSANGUINARINE	dihydrosanguinarine	154957	1.18012e+06	1.18448e+06	584056	1.30033e+06	1.2776e+06	1.2373e+06	1.26544e+06	1.24905e+06	1.10091e+06	1.32672e+06	590011	1.15813e+06	1.1793e+06	1.18887e+06	177843	371251	1.14966e+06	1.26339e+06	1.21839e+06	1.24077e+06	1285326	1.3148e+06	1.30194e+06	1.22328e+06	1.1396e+06	407369	1224392	1.23182e+06	1.23335e+06	1.25218e+06	1.25272e+06	1.26597e+06	1.24227e+06	1	1.21152e+06	1.19363e+06	1.16652e+06	1207468	1.19483e+06	1.16344e+06	1.15894e+06	1.29158e+06	1.31039e+06	1264861	463551	1.26127e+06	1
DIHYDROXY-BUTANONE-P	1-deoxy-L-glycero-tetrulose 4-phosphate	41642.3	39202.7	25950.3	23265.5	100306	112814	84758.9	80324.4	40446.1	60021.1	15807.1	10773.4	40048.6	44648.8	36064.7	50915.9	28293.1	40926.6	50281.5	41858.5	36589.9	18990.2	24544.3	60693.5	103310	95863.8	37075.5	41441.5	83437.9	51850.9	1	1	27279.2	27903.7	43419.4	31513.5	1	1	1	1	1	1	1	1	1	1	1	1
DIHYDROXYINDOLE	5,6-dihydroxyindole	165630	152947	171163	179192	163272	177009	18412.3	18745.2	87850	91252	112304	125226	811231	834208	843178	859395	192702	805939	130729	131042	122686	99555.1	97008.3	100669	98152.2	97257.1	123159	139989	100892	99822.3	169569	158365	149083	129967	727071	152870	78929.6	79953.5	71145.9	83240.1	99083.9	95597.2	31402.3	25882.4	33952.9	24360.3	48136.2	41515.1
DIHYDROXYNAPHTHOATE	1,4-dihydroxy-2-naphthoate	104760	113167	106473	105115	90949.6	94628.9	42838.1	45900.3	76279.1	75292.4	107213	104560	103512	101781	103588	104131	94679.8	88737	93206.7	95054.2	99328.1	100058	86008.4	80488.9	46236	45333.8	83930.4	81505.5	73833.5	78699.8	107484	108936	95051.3	97685.9	84923.9	87276.1	89585.6	84341.1	87323.2	82548	89881.9	92982.9	83125.1	81704.3	87007.6	89379.5	93643.8	91400
DIMETHYL-D-RIBITYL-LUMAZINE	6,7-dimethyl-8-(1-D-ribityl)lumazine	1	1	1	1	1	204872	100089	100216	174024	378136	201270	430372	1	1	1	1	1	1	160694	373051	180934	184530	186449	182590	1	1	1	1	1	1	1	1	1	1	1	1	1	1	1	1	1	12381.4	1	1	16948.7	11343.4	1	17475
D-LACTATE	(<i>R</i>)-lactate	1	1	1	1	1	1	1	1	1	1	1	1	1	1	1	1	1	1	1	1	1	1	1	1	1	1	1	1	1	1	1	1	1	1	1	1	1	1	1	1	1	1	1	1	1	1	1	1
DMPBQ	2,3-dimethyl-6-phytyl-1,4-benzoquinol	1	1	23270.4	111766	155585	137368	141737	120284	28725.7	105603	84272	50046.3	116218	105515	120934	131451	103350	117172	1	24402.9	108553	24723.7	110595	125374	94568.2	100805	87895.2	36411.8	48800.9	50065.6	1	1	120460	115499	118733	123147	1	1	20456.5	107171	101285	102406	110554	110057	83331.2	1	26109.4	66580.1
DOPAMINE	dopamine	69974.3	10796.6	11353.6	11402.8	68881.5	60201.5	25454.4	35695.7	10242.8	51257.6	12175.5	16835.4	62132.8	57247.7	64167.8	64402.3	58045.1	54552.2	64929.2	54134.8	60540.8	62004.5	10713.2	11290.9	56449.7	50763.2	30206.1	31051.3	17440	57401.7	57889.9	11918.9	63979.3	64645.9	57166.1	40803.4	10858.2	58228.4	10730.9	53206.7	24320	54917	23113.2	17433.3	46161.5	41674	47764.7	86244.7
DPG	3-phospho-D-glyceroyl-phosphate	1	1	1	1	1	1	1	1	1	1	1	1	1	1	1	1	1	1	1	1	1	1	1	1	1	1	1	1	1	1	1	1	1	1	1	1	1	1	1	1	1	10398.5	1	15740.9	1	1	1	1
D-SERINE	D-serine	170643	156333	222999	236152	222308	261521	112359	85718.1	122876	158545	154608	161522	234639	250371	213000	231323	293507	290895	164578	138468	162562	160804	169919	257042	234860	239027	186228	214583	233257	215588	156804	163130	258174	222151	276131	233208	242981	278661	277576	312999	214884	207997	190971	185181	136276	132683	44048.6	40704
DTDP-DEOH-DEOXY-GLUCOSE	dTDP-4-dehydro-6-deoxy-&alpha;-D-glucopyranose	33299.7	34780.5	30175.7	29424.6	17061.9	21834.9	1	17341.8	33856	25298.3	49576.7	49626.4	23117.9	33707.6	34049.9	40629.7	56767.4	42611.9	33063.3	26431.7	43228.3	45088.2	31971.2	21189.3	44503	36418.7	36881.3	40698.6	67975	68458.8	37904.7	40148.1	46111	39017.4	34089.8	34216.2	21586.3	38615.1	1	1	1	1	35333.4	42969.1	42242	26583.1	28771.1	16923
DTDP-DEOH-DEOXY-MANNOSE	dTDP-4-dehydro-&beta;-L-rhamnose	33299.7	34780.5	30175.7	29424.6	17061.9	21834.9	1	17341.8	33856	25298.3	49576.7	49626.4	23117.9	33707.6	34049.9	40629.7	56767.4	42611.9	33063.3	26431.7	43228.3	45088.2	31971.2	21189.3	44503	36418.7	36881.3	40698.6	67975	68458.8	37904.7	40148.1	46111	39017.4	34089.8	34216.2	21586.3	38615.1	1	1	1	1	35333.4	42969.1	42242	26583.1	28771.1	16923
DTDP-D-GLUCOSE	dTDP-&alpha;-D-glucose	616848	614621	581002	577602	497232	454574	421727	455455	504570	553924	795109	749381	597609	511684	585984	603635	739326	746792	484160	565461	593094	572421	552959	527796	645308	767446	681302	666801	1.03884e+06	1.02158e+06	701174	702856	705923	710940	638828	609581	1.10884e+06	875400	808326	776907	787755	781856	789644	727264	702396	751797	730332	711564
DTDP-RHAMNOSE	dTDP-&beta;-L-rhamnose	47071.1	45033.3	45304.2	46272.5	34516.1	22615.6	28206	27617.9	41179.8	46820.9	72459	60272.4	49104.5	43039	51640	45761.4	54598.2	64942.6	40974.9	47898.9	46686.7	51948.4	49696.3	42539.2	53370.9	59444.3	63012.2	51833.2	96669	93684.8	59169.2	51396.6	57286.7	61535.4	50419	49281.7	99715.1	71740.1	60523.9	61372.3	58520.2	60771.3	67368.6	54044.6	25784.3	25169.3	28261.8	23076.7
DUDP	dUDP	109282	106198	109205	116862	77314.5	87973.9	12437.1	1	46791.9	42951.8	75701	73862.9	101139	106015	111614	113054	90541.4	87360.9	59619.7	57202.6	72247.7	71662.5	55089.2	57485.9	29007.8	22228.7	70502.3	79319.7	54694.3	62454.7	104042	103491	87910.7	86228.9	75657.5	73259.6	69232.7	68337.2	68105.4	71212.8	72265.9	76670.5	52400.5	53653.2	58167.5	58892.9	67032.1	64984.2
EDTA	EDTA	102312	105695	71099.4	88792.3	87089.8	12061.1	11836.7	11963.8	126110	58759.7	186791	174511	75050.1	176152	84708.8	162121	167239	171186	120408	122163	122271	117905	107704	109127	39965.8	87622.6	179442	174260	128396	125518	197047	193912	87162.4	85034.1	129948	130464	43873.1	41636.2	57440	44687.7	59088.6	65582.4	35290.2	33867.4	39584.8	42467.1	72665.4	68064.1
ENT-COPALYL-DIPHOSPHATE	(-)-<i>ent</i>-copalyl diphosphate	31619.1	29618	63304.4	67476.3	1	1	1	1	40970.9	39539.1	133036	119162	54423.7	57788.8	53501.8	45678.2	82181	86247.7	47812.2	53046.7	55568.8	49723.4	63583.1	62416.8	1	1	97988.4	88848.3	28935.4	18559.8	142408	142887	59967	64843.8	61358.1	55350.3	1	1	1	19118.3	73662.3	70560.8	1	1	54021.2	60400.8	131965	128885
ENT-KAUR-16-EN-19-AL	<i>ent</i>-kaurenal	60055.8	53218.9	28605.2	21934.9	34037.4	28506.6	1	11747.3	10626.6	38272.9	37638.8	37600.2	50661.7	11065	11259.7	48099.3	24763.2	20424.9	18442.5	16966.7	10982.8	11476.3	45385.9	45019.6	45483.3	53849.9	28888.9	28597.1	25719.9	17834.8	20792.7	24419.6	19857.2	25238.6	23015.4	17952.6	33537.7	39054.9	11208.7	11996.9	34133.9	36286.7	39850.9	35231.6	56124.3	20580.3	40295.2	39745.8
ENT-KAUR-16-EN-19-OL	<i>ent</i>-kaurenol	1	1	1	1	1	1	1	1	1	1	10857.2	39355.1	1	1	1	1	34538.8	17660.1	1	1	1	1	1	1	1	1	23390.7	1	26293.7	25365.9	1	1	1	1	1	1	1	1	1	1	1	1	1	1	1	1	1	1
EPISTEROL	episterol	59769	59306.8	56152.3	60957.4	46955	49279.4	40943.6	41079.7	61542.2	60085.1	97492.9	102086	60005.9	54615.8	67125.4	62975.9	93972.8	88776	63181.5	60807.2	70026.2	74625.2	55870.1	58419.4	70986.3	70134.4	86880.8	86201.3	101937	105550	60621.5	56695.8	75516.1	76338.5	67319.5	63949.6	62474.3	61284.6	86883.1	92646.1	83350.2	77474	146376	147096	181554	180619	117161	119177
EPOXYSQUALENE	(3<i>S</i>)-2,3-epoxy-2,3-dihydrosqualene	1	54620.3	48835.1	50479.3	40340.2	47836.9	43398	41148.8	58515.4	55306.8	98288.8	93634.6	55058.7	56783.3	52432.6	52608.6	1	94201.2	63167.8	55951.4	58761.6	59669.7	46460.7	53100.8	1	62000.2	80373.9	79637.1	111136	108928	1	1	65935.9	66768.3	53597.8	53234.3	53200.3	61762.2	45369.4	52569.9	55185	53569.1	82234	92737.1	77099.7	71944.1	61318.3	59080.8
ESTRONE	estrone	19470.6	17312.2	12500.8	12615.3	20685.7	18967.8	20443.2	18507.6	1	1	12480.5	1	17227.7	11877.2	11816.7	13038.1	1	1	1	1	1	1	1	1	115680	121699	154850	152751	12270.2	1	17024.3	11469.1	1	1	1	1	1	1	11194.1	11278.2	27576.9	27500	1	1	17991.6	17400.8	25407.5	21564.4
ETHANOL-AMINE	ethanolamine	206852	208160	198729	197987	179411	181079	143468	138656	172121	159914	190929	192421	193336	184852	183860	188250	172327	174481	182917	180191	189594	207470	171153	173922	138051	131276	177861	179207	155765	168495	202085	201833	187869	188038	171968	177737	164800	149144	162649	152180	157958	159720	163046	160720	159006	166140	164098	174617
FORMYL-COA	formyl-CoA	662657	669951	626134	643695	494710	452107	403885	417708	545544	582349	961456	921000	626173	591538	646890	644132	885063	868824	569210	617209	668535	696720	589662	572980	726664	759429	760079	760211	1.18986e+06	1.19059e+06	802095	789402	821695	816700	689339	674301	988649	890382	711426	699466	704396	703988	789434	779891	799346	802311	760238	774042
GALACTITOL	galactitol	40670.5	44435.6	31365.3	31223.1	36533.6	40790.1	11710.1	18249.8	31766.9	30308.7	24516.5	34252.3	29733.4	25257.1	1	23064	22956.2	1	32030.2	30604	39252.2	41317.3	38480.7	37899.3	15084	1	1	23262.8	30375	23818.4	1	1	1	1	1	1	1	1	1	1	1	1	1	1	1	1	1	1
GALACTOSE	&beta;-D-galactopyranose	820412	878758	1.25882e+06	1.22293e+06	310300	65275.3	47496.3	26202.3	2134499	985698	107029	907661	1.14597e+06	639575	1.17112e+06	1.20168e+06	1.01073e+06	987522	296172	249093	268654	180608	132094	186752	81539	127229	1	133984	132312	119542	407991	519398	388860	31467.5	350478	353424	1167135	1.00522e+06	1.04997e+06	961638	1099263	1.07598e+06	1.39765e+06	1.39441e+06	1.36252e+06	1.41268e+06	1.58136e+06	1.51725e+06
GAMA-TOCOPHEROL	&gamma;-tocopherol	1	1	23270.4	111766	155585	137368	141737	120284	28725.7	105603	84272	50046.3	116218	105515	120934	131451	103350	117172	1	24402.9	108553	24723.7	110595	125374	94568.2	100805	87895.2	36411.8	48800.9	50065.6	1	1	120460	115499	118733	123147	1	1	20456.5	107171	101285	102406	110554	110057	83331.2	1	26109.4	66580.1
GDP	GDP	11184.5	23037	27601.7	11273.6	30079.1	31526	22702.7	11251.6	17816	36285.9	11717.2	1	23160.1	22473	28614.1	12300.8	22932.8	11504	25967.7	17374.6	24212.8	23516.1	17470	18010.8	15767.6	1	1	1	27573.3	15730.3	1	16424	16267.2	1	21735.1	16317.1	1	1	1	1	1	1	1	1	1	1	1	1
GERANIAL	geranial	136888	143313	91020.5	107322	77833.5	64912.3	74177.9	59944.8	87154.5	85983.1	149501	149610	104315	101941	95065.2	101845	171449	150146	92038	104115	98706.9	108639	100075	91725.6	107703	128698	133019	121040	165041	186062	153735	153868	142778	148084	126403	115506	143813	115088	109059	102882	142766	123131	157282	134474	123486	128969	150108	129000
GERANIOL	geraniol	22881.3	27368.9	1	737692	390741	392322	489818	1	369287	349998	1.69723e+06	1725079	603808	590614	864893	855153	1.03837e+06	1.04065e+06	973880	945468	1	546951	296107	1	2.51961e+06	2.51714e+06	1.15003e+06	1.14297e+06	780795	784895	893369	870730	411894	429137	1	436615	34683.1	37194.6	560427	582634	1	19934.1	708436	56407.3	459382	463870	404716	418187
GERANYLGERANYL-PP	geranylgeranyl diphosphate	31619.1	29618	63304.4	67476.3	1	1	1	1	40970.9	39539.1	133036	119162	54423.7	57788.8	53501.8	45678.2	82181	86247.7	47812.2	53046.7	55568.8	49723.4	63583.1	62416.8	1	1	97988.4	88848.3	28935.4	18559.8	142408	142887	59967	64843.8	61358.1	55350.3	1	1	1	19118.3	73662.3	70560.8	1	1	54021.2	60400.8	131965	128885
GERMANICOL	germanicol	1	54620.3	48835.1	50479.3	40340.2	47836.9	43398	41148.8	58515.4	55306.8	98288.8	93634.6	55058.7	56783.3	52432.6	52608.6	1	94201.2	63167.8	55951.4	58761.6	59669.7	46460.7	53100.8	1	62000.2	80373.9	79637.1	111136	108928	1	1	65935.9	66768.3	53597.8	53234.3	53200.3	61762.2	45369.4	52569.9	55185	53569.1	82234	92737.1	77099.7	71944.1	61318.3	59080.8
GLC	&beta;-D-glucopyranose	820412	878758	1.25882e+06	1.22293e+06	310300	65275.3	47496.3	26202.3	2134499	985698	107029	907661	1.14597e+06	639575	1.17112e+06	1.20168e+06	1.01073e+06	987522	296172	249093	268654	180608	132094	186752	81539	127229	1	133984	132312	119542	407991	519398	388860	31467.5	350478	353424	1167135	1.00522e+06	1.04997e+06	961638	1099263	1.07598e+06	1.39765e+06	1.39441e+06	1.36252e+06	1.41268e+06	1.58136e+06	1.51725e+06
GLN	L-glutamine	6227990	6013235	6.93362e+06	7067519	7637426	8283439	2.54112e+06	2.23415e+06	3.47103e+06	4048696	2.99451e+06	2.95549e+06	7.50183e+06	7757545	6776715	7156387	7006969	6973235	4.11332e+06	3.86526e+06	3.27388e+06	3404223	3.4548e+06	1	3.56263e+06	3.7064e+06	3.93004e+06	4143859	4.36501e+06	3.86479e+06	4.95686e+06	5.04816e+06	4450935	4163029	5718140	5178690	1.95172e+06	2.08855e+06	2153117	2.29944e+06	1.80256e+06	1.77456e+06	1.37404e+06	1.34149e+06	1.10065e+06	1.06172e+06	784519	755103
GLUCOSAMINE-1P	&alpha;-D-glucosamine 1-phosphate	3.21007e+06	3.23814e+06	2.616e+06	2.59972e+06	1.41357e+06	1.44662e+06	596010	1	833683	772097	1.01657e+06	945024	1.53051e+06	1.55587e+06	2.15935e+06	2.18341e+06	1.54616e+06	1.49934e+06	955903	934831	541540	549073	305227	307499	1	1	720451	1	459007	458700	1.43644e+06	1.45296e+06	1062025	1066585	820206	829309	145469	143269	162736	160501	356266	1	205938	195757	513558	515155	1	765413
GLUTACONATE	(<i>E</i>)-glutaconate	220427	218150	201023	204934	190884	189055	126517	134749	164671	155794	197035	197138	198666	193834	196936	199760	168959	176932	192416	178920	195813	192987	173175	167344	126913	116434	168604	176039	152050	161434	206177	204041	188491	197999	179240	177689	175519	171692	187304	177800	176255	187871	188537	179876	184767	183819	191055	185438
GLUTAMATE-1-SEMIALDEHYDE	(S)-4-amino-5-oxopentanoate	1	1	1	1	1	1	1	1	1	1	1	1	1	1	1	1	1	1	1	1	1	1	1	1	1	1	1	1	1	1	1	1	1	1	1	1	49715.9	51290.2	51365.8	57555.8	35258.5	42050.4	39571.2	37281.6	17560.5	17331.5	1	11572.7
GLUTATHIONE	glutathione	112548	115013	159006	157926	92123.9	95785.8	63079.9	48934.3	133234	131450	167246	164448	161672	160446	172233	171477	150650	147861	152156	138721	120636	124978	116023	111396	113761	107748	162876	174668	134372	120035	194115	178970	164029	165962	126393	127778	107903	104718	114468	110065	120078	119039	63341.6	66384.8	68951.6	67711.4	48075.4	52046.1
GLYCEROL	glycerol	1	793917	861146	786857	859948	898139	431976	139422	1	680096	778525	1	1.11779e+06	830123	828340	1.20966e+06	834055	1	707948	909127	264992	716076	1	722158	723460	696726	871187	918869	856241	1	765384	1.14748e+06	1.14608e+06	830004	721498	701354	725742	828592	730510	783511	866588	847090	680660	797697	728692	264060	490043	768302
GTP	GTP	598351	561369	1.00634e+06	979681	1.07547e+06	986261	900407	905413	1.11968e+06	1.15966e+06	1.41049e+06	1.30705e+06	862467	997581	1.19183e+06	1.20981e+06	1.50222e+06	1480030	825307	710789	1.59489e+06	1.61764e+06	1.47112e+06	1.41958e+06	878392	638340	1.82563e+06	1.78874e+06	2742678	2696220	673205	702303	1.53426e+06	1.51892e+06	1.60165e+06	1.61282e+06	849627	958191	1233328	1.2421e+06	1.63411e+06	1.65883e+06	892027	847420	1.46821e+06	1.51698e+06	1.43962e+06	1.46236e+06
GUANINE	guanine	101215	94682.1	334848	316158	350734	141541	74393.1	76436.1	48050.9	110962	167997	164341	180245	183857	99443.1	195909	135706	125833	131535	124923	120292	121708	137813	138429	245184	232087	320552	311084	566463	566060	184759	182537	74360.1	158301	154967	147932	57389.1	34463	56089	55836.7	80844.9	84376.6	39898.8	42007.8	73265.9	65927.5	100560	102115
GUANOSINE	guanosine	20581.7	19351.1	149122	39751.8	179467	183877	46485.2	43400.6	48283.9	49815.6	70882	71673.3	76660.8	86620.5	18705.8	18046.8	67720.3	55715.2	59800.1	51178.4	53087.2	50171.8	58482.9	67256.8	16928.7	91127.8	139126	37731.3	266276	252719	80284.3	73378.8	10810.3	68977.5	68743	66912.3	11368	11495.7	11297.6	11875.3	27958.6	28354.4	1	1	20531.7	14040.1	28887.2	37456.1
GUANOSINE-5DP-3DP	ppGpp	255946	252809	235514	242701	211764	255365	192950	210703	289246	273660	387057	381905	240559	280441	300840	274095	382526	370085	307320	264016	311204	327813	254021	258523	332937	275636	323954	307040	474841	492400	313660	315137	357423	343833	291676	303145	220343	299313	155061	180805	164705	167240	262637	309846	273527	260923	232902	222684
HEXANAL	1-hexanal	1	1	10563.6	16765.1	10259.8	16828.5	1	1	1	1	1	17353.6	6137.95	10346.2	10625.1	33234.4	1	49987.5	1	29946.2	44881.3	1979.34	1	1	10577.7	1	1	1	1	28056.6	22955	1	1	10352.3	1	1	27650.4	1	44541.9	16591.9	16301.9	5648.87	42194	21423.9	10562.7	21879.6	11032.5	21471
HEXANOYL-COA	hexanoyl-CoA	1	1	1	1	1	1	1	1	1	1	36115.6	22704	1	1	1	1	28666.3	17865.9	1	1	1	1	1	1	1	1	10767.8	1	50678.1	38821.7	1	1	1	21670	1	1	1	1	1	1	1	1	1	1	1	1	1	1
HIS	L-histidine	18669.4	18919.5	17300.1	11118.5	17327.7	13727.6	16952	1	19566.8	30017.3	18449.6	24208.1	12190.2	17595.3	11632.9	1	11265	11765.2	29126.1	37553.7	32831.1	20029.1	21232.6	21634.3	1	1	1	15883.6	10928.2	1	12358.1	23753	23675	18480.3	11810.8	22899.1	1	1	1	1	1	1	1	1	1	1	1	1
HISTIDINAL	histidinal	56732.8	122542	131254	17837.4	124157	112635	95710.1	17748.5	52600.7	54801.9	22504.1	142022	11002.9	109724	63806.8	122636	1	125523	116627	63593.1	58948.9	17071.1	103456	136114	50468	17583.5	22942.2	74939.2	17196.5	23188.7	128724	11058.2	117306	16467.1	119576	12728.6	24024.8	76394.3	17240	140980	138433	22721	18847.7	17189	18209.8	29792.6	30077.9	22607.7
HOMO-SER	L-homoserine	1.21372e+06	1.14775e+06	1.33869e+06	1.39625e+06	1.15857e+06	1.31482e+06	561376	457678	718053	918575	756796	773260	1.29401e+06	1.38412e+06	1.29536e+06	1.35814e+06	1.38909e+06	1.36383e+06	880756	805985	869938	922022	737579	1.02564e+06	1.10372e+06	1.13824e+06	930889	1.03015e+06	1.14285e+06	1.01684e+06	833851	822383	1.13864e+06	1.02289e+06	1.26663e+06	1.05953e+06	294337	334053	329124	368038	261635	248196	197058	182473	116287	106708	61262.7	58015.6
HYDROXYMETHYLBILANE	preuroporphyrinogen	16965	22277.3	15502.4	1	1	1	1	1	1	1	40931.2	40331.8	16068.2	1	1	1	47333.6	46359.8	1	1	1	10398.8	1	1	15898.4	22024.7	41872.6	28493.1	55807.4	50256.1	34833.3	29197.8	42514.5	49537.4	33659.2	21318.1	65341.8	46604.8	44195.7	35864.2	38095	30869.8	10875.1	15867.2	27856.9	39569.5	40522.5	47761.6
HYDRPHENYLAC-CPD	(4-hydroxyphenyl)acetaldehyde	35471.2	31712.8	39481.3	30730.7	22773.5	27542	1	1	1	1	1	1	1	1	1	1	1	1	1	1	1	1	1	1	13123.8	11039.4	14707.3	14075.1	68477	63192.4	17895.8	1	1	1	1	1	16851.4	1	1	1	44986.3	49718	1	1	74283.9	72560.1	95553.1	1
HYPOXANTHINE	hypoxanthine	303775	302863	204486	192471	157708	142697	57234.6	60194.1	68371.8	51995	77895.2	74988.6	106100	113692	135744	144856	122281	112259	56200.3	65574.6	32549.1	29679.7	1	1	131813	122953	124544	1	116011	109940	95615.3	105094	79822.6	69925.5	62519.3	66971	1	1	1	1	1	1	1	1	1	1	22461.3	31724.4
ILE	L-isoleucine	3.81359e+06	3.57352e+06	3.88095e+06	3.72864e+06	3.31599e+06	3.62999e+06	1.17659e+06	1.0946e+06	2.22441e+06	2592868	2729737	2.54884e+06	3583101	3.6577e+06	3.56799e+06	3732843	3.53285e+06	3549583	2.55516e+06	2.33988e+06	2.38557e+06	2.48352e+06	2.34293e+06	2.99366e+06	2061642	1948070	2.91779e+06	3163098	3223069	2.99715e+06	3.09179e+06	3.03604e+06	3.15568e+06	2.96168e+06	2.99868e+06	2.72928e+06	1063823	1.16897e+06	1.37007e+06	1.35818e+06	1.46903e+06	1.42547e+06	1.03109e+06	1.09252e+06	1.25569e+06	1.16992e+06	1.10472e+06	1.11789e+06
IMIDAZOLE-ACETOL-P	imidazole acetol-phosphate	1	1	1	1	1	1	1	1	1	1	1	1	1	1	1	1	1	1	1	1	1	1	1	1	1	1	1	1	1	1	1	1	1	1	1	1	1	1	1	1	1	1	1	1	1	1	1	1
IMINOASPARTATE	2-iminosuccinate	166758	192134	194743	176771	150990	175001	118299	112769	137952	122097	194138	191374	191618	182526	175101	180530	153076	154662	160615	147116	181297	185004	149947	144310	93810.5	87569.7	142820	135567	121274	137934	166847	169454	160439	160819	147081	152732	155259	149346	143980	155914	166864	144942	141794	173140	155602	168124	156827	159293
INDOLE	indole	25128.4	20004	11930.6	11312.7	248712	252515	106756	95370.2	23407.2	17799.9	11809.2	341807	11635.7	18466.4	17110.5	15975.5	286615	11436.2	10917	11358.8	16579.8	12603	12732.6	17395.3	167298	12060	19774.1	18241.1	11880.7	207497	10732.9	392229	32505.6	316689	16846.3	16263.4	360038	370810	21604.2	365081	16578.5	438188	31933.5	641132	1.13281e+06	1.15225e+06	993583	995440
INDOLE_ACETATE_AUXIN	(indol-3-yl)acetate	84608.8	83644.3	84433.4	77319.9	82064.4	82873.6	68313.2	71579.4	81257.7	72470.5	87051.8	87646.8	80651.1	82994.2	72164.5	77171.3	78204.3	79624.1	85470.7	88696.6	87023.4	86804.9	86320.6	85657.8	71095.7	58262.7	78513.6	78833.3	69328.9	70405.4	79913.3	81980.8	84920	80058.3	78129	70074.4	58508.9	57973.8	52587.8	55715.1	52677.2	55048.5	58831.3	64869.3	59371.7	62004.8	62456.9	62207.9
INDOLE_PYRUVATE	(indol-3-yl)pyruvate	1.12475e+06	1.13105e+06	912972	869003	835094	812340	1	1	813621	717330	651311	649506	813647	816346	837764	862009	741197	719861	828658	843937	365055	692896	605271	1	540049	1	572158	561667	588948	585510	648034	636204	780344	779696	738879	752172	1	1	1	1	1	1	1	1	1	1	1	1
INDOLE-3-ACETYL-ASP	(indol-3-yl)acetyl-L-aspartate	72218.8	29574.9	76207.7	84134.9	30185.4	29118.3	36467.7	37179.1	67792.3	59152.8	81600.7	73649.1	65109.2	11637.9	16924	11572.7	22006.8	65331.9	60486.2	11238.8	10568.7	67269.7	17080.6	62331.1	63789.6	63900.1	84614.4	78616.5	76367.3	74445.3	77162	74863.2	22025.1	79536.6	62786.4	66105.1	75290.3	37919.6	76094.7	31228.9	83393.5	39434.4	83450	81385.2	134779	122842	125208	65938.1
INDOLE-3-ACETYL-BETA-4-D-GLUCOSE	4-<i>O</i>-(indol-3-ylacetyl)-&beta;-D-glucose	76597.7	27014.3	111929	47191.4	13667.3	50379.2	58949.7	65788.7	139798	137105	176209	115364	59562.5	64664.2	32242.5	31035.1	106355	58347.5	157809	136111	98692.1	163472	93287.4	91402.9	93521.5	131895	218620	135470	205532	130389	77856.4	113962	88282.3	99308.4	90206.4	98615.9	109131	93542.6	115953	131718	147096	77792.6	141782	87272.1	140005	136372	206561	214967
INDOLE-3-ACETYL-BETA-6-D-GLUCOSE	6-<i>O</i>-(indol-3-ylacetyl)-&beta;-D-glucose	76597.7	27014.3	111929	47191.4	13667.3	50379.2	58949.7	65788.7	139798	137105	176209	115364	59562.5	64664.2	32242.5	31035.1	106355	58347.5	157809	136111	98692.1	163472	93287.4	91402.9	93521.5	131895	218620	135470	205532	130389	77856.4	113962	88282.3	99308.4	90206.4	98615.9	109131	93542.6	115953	131718	147096	77792.6	141782	87272.1	140005	136372	206561	214967
INDOLE-3-ACETYL-GLN	(indol-3-yl)acetyl-L-glutamine	3929763	3.98521e+06	4004563	3938115	3979311	3.8335e+06	2.3551e+06	2378884	3.49842e+06	3.38676e+06	3.91267e+06	1.66388e+06	3.4843e+06	3651661	3.70031e+06	3.84543e+06	3.69226e+06	3.41417e+06	3.45199e+06	3396691	3.56418e+06	3.59828e+06	1.59804e+06	3557916	1.49358e+06	3.27094e+06	4.06537e+06	4007709	3.75148e+06	3.73939e+06	3706924	3587775	3.71063e+06	3841059	3.12837e+06	3251634	4.4107e+06	4.04076e+06	4248014	4.01229e+06	4.4879e+06	4.24862e+06	2.0417e+06	4401263	5093869	8082524	8.14575e+06	8122140
INDOLE-3-ACETYL-LEU	(indol-3-yl)acetyl-L-leucine	644911	200353	325423	445497	449774	430785	161802	1	130551	378136	170276	166611	265538	411051	416579	442067	412345	381992	162151	140135	182017	185922	81942.1	71237.8	367752	373756	720668	696514	645006	373175	420509	422436	616386	626044	362749	376234	491102	231795	495760	473628	499023	268415	182336	496263	859207	314595	882016	195967
INOSITOL-1456-TETRAKISPHOSPHATE	D-<i>myo</i>-inositol (1,4,5,6)-tetrakisphosphate	83442.2	87659.1	81310.8	87055.7	59170.5	54285.2	58768.1	62045.2	71961.3	75176.6	122689	118960	88128.1	76985.1	82602.9	85555.8	122813	124341	78476.3	80965.2	86517	85339.7	79114.6	75905	87222.7	90134.7	96633.6	101175	151234	147384	101978	95402.3	109836	109259	94768.7	96458.2	146318	114554	112591	105149	100062	96270.5	105894	103105	110603	104020	107639	107492
ISOEUGENOL	isoeugenol	175526	67161	190795	193914	352696	80333.3	49950.6	33420.7	2700987	2.33895e+06	121451	2073498	190563	82935.9	124626	147766	192131	186545	107006	119652	112598	109989	103987	112217	77508.5	79194.8	145859	142829	152620	148926	108744	103192	126256	133478	119639	119378	270887	784665	260546	240924	905331	886302	1.25449e+06	245416	263359	260820	1344368	224656
ISOMETHYLEUGENOL	isomethyleugenol	48765.6	24989.5	12128.5	16946.4	17720	41797.6	1	11735.1	12283.6	10954.7	55915.2	61385.4	6053.78	10935.2	18464.9	11842.6	47931.1	40175.7	17770.9	23815.2	12453.9	23671.2	26883.5	26900.9	26546.6	26167.6	63560.3	67301	44126.3	28862.7	47616.8	47187.7	30885.4	37792.1	39064.9	37074.3	111871	109837	122655	117326	13840.6	13668.3	78054.3	77339.4	110453	105227	37052.4	111447
ISOVALERATE	isovalerate	227752	214326	209284	216057	219327	227615	103372	86083.3	112319	130612	130676	130067	227249	234826	241087	232785	207657	191908	130662	122937	129871	131503	114638	140675	148483	140975	183258	202230	190229	171645	219497	216236	218586	194530	207883	192264	130121	142265	146389	167762	170727	170854	113483	108148	120316	124926	122361	119722
L-1-GLYCERO-PHOSPHORYLCHOLINE	<i>sn</i>-glycero-3-phosphocholine	217153	210218	208685	197373	235907	251697	174896	170927	341459	334821	345732	339052	189896	210361	183944	185459	176292	167869	330395	325971	308831	324087	318758	326014	240500	221536	286902	283772	295575	290832	259737	253555	199954	190987	237549	177229	2171150	2.20093e+06	2.17114e+06	2.1742e+06	1.93538e+06	1.91779e+06	1.87826e+06	1.85064e+06	1512916	1.52709e+06	1.00922e+06	998966
L-1-LYSOPHOSPHATIDATE	1-oleoyl-<i>sn</i>-glycerol 3-phosphate	11097.5	16103.4	25425.8	20658.1	11217.2	1	1	1	12217.5	12784	20226	20138.3	17339	22317.1	11673.6	13034.4	13057.7	18383.7	11156.1	18374.6	17958.9	13030.2	11756.7	12358	1	1	23405.9	28692.6	31506.5	28649.1	18508.7	18997.8	13918.5	19343.3	17538.3	17961.1	29300.1	21922.3	20848.6	26970.4	21336.2	26632.9	18769	18655.2	19624.8	21074.1	27722.4	30511.5
L-2-AMINOPENTANOIC-ACID	L-norvaline	3.6415e+06	3530721	3.30355e+06	3323063	2.98628e+06	3.23693e+06	1.96444e+06	1.77944e+06	4014064	4.31102e+06	4741673	4.82034e+06	2.86007e+06	3.02898e+06	3.22003e+06	3372386	5172679	5095992	2.28117e+06	2.15584e+06	2.31351e+06	2.28576e+06	2.02234e+06	2582710	2.06487e+06	2.08617e+06	2.36644e+06	2659389	2457760	2.23225e+06	2.7995e+06	2.80093e+06	2.88241e+06	2.76565e+06	2.75535e+06	2.42543e+06	2042481	2.12753e+06	2.15786e+06	2.34686e+06	1918379	1.88595e+06	1.3614e+06	1.32022e+06	2.42275e+06	2.3757e+06	1.20702e+06	1171972
L-ASPARTATE-SEMIALDEHYDE	L-aspartate 4-semialdehyde	26913.8	25536.2	26352.1	20891.2	1	16264.1	1	1	19060.4	23844.5	19100.7	19104.2	16490.5	19710	11699.9	17058	11348.6	11123.5	30525.5	36829.1	1	16983.9	15905.9	1	1	1	19203.6	20147.2	18948.1	17495.6	18349.8	10438.5	10558	10738.9	11925.7	10769	1	1	1	1	1	1	1	1	1	1	1	1
L-CITRULLINE	L-citrulline	1.61006e+06	1565436	1.42196e+06	1.44839e+06	1.3012e+06	1.38096e+06	430106	400827	806680	854642	792144	791448	1.47829e+06	1.54396e+06	1375266	1.42785e+06	1.4424e+06	1444145	800649	753194	808584	823941	721087	860887	764487	782668	955389	997698	963749	923068	1.27966e+06	1.24379e+06	966126	927311	1.25355e+06	1.15033e+06	75070.7	93885.3	92276.2	108573	70905.4	77113.4	44564.4	55969.2	1	10529.2	49392.8	53524.1
L-DOPACHROME	L-dopachrome	862512	847480	684625	708976	568990	568860	141657	132031	5926.82	23016	416235	57015.4	505108	512264	542454	541829	545913	548992	294475	277895	27849.1	237172	180147	173809	175317	44194.2	345258	48613	256506	258287	33591.3	38013.5	395349	376548	249835	44828.3	109458	108769	115546	117505	69715	70388.6	43183.3	47320.9	1	1	1	1
LEU	L-leucine	3.81359e+06	3.57352e+06	3.88095e+06	3.72864e+06	3.31599e+06	3.62999e+06	1.17659e+06	1.0946e+06	2.22441e+06	2592868	2729737	2.54884e+06	3583101	3.6577e+06	3.56799e+06	3732843	3.53285e+06	3549583	2.55516e+06	2.33988e+06	2.38557e+06	2.48352e+06	2.34293e+06	2.99366e+06	2061642	1948070	2.91779e+06	3163098	3223069	2.99715e+06	3.09179e+06	3.03604e+06	3.15568e+06	2.96168e+06	2.99868e+06	2.72928e+06	1063823	1.16897e+06	1.37007e+06	1.35818e+06	1.46903e+06	1.42547e+06	1.03109e+06	1.09252e+06	1.25569e+06	1.16992e+06	1.10472e+06	1.11789e+06
L-GALACTOSE	&beta;-L-galactopyranose	820412	878758	1.25882e+06	1.22293e+06	310300	65275.3	47496.3	26202.3	2134499	985698	107029	907661	1.14597e+06	639575	1.17112e+06	1.20168e+06	1.01073e+06	987522	296172	249093	268654	180608	132094	186752	81539	127229	1	133984	132312	119542	407991	519398	388860	31467.5	350478	353424	1167135	1.00522e+06	1.04997e+06	961638	1099263	1.07598e+06	1.39765e+06	1.39441e+06	1.36252e+06	1.41268e+06	1.58136e+06	1.51725e+06
L-GAMMA-GLUTAMYLCYSTEINE	&gamma;-L-glutamyl-L-cysteine	1	1	1	1	1	1	1	1	1	1	1	1	1	1	1	1	1	1	1	1	1	1	1	1	1	1	1	1	1	1	1	1	1	1	1	1	44887	41673.8	41350	39462.9	1	1	52296	56486.1	38645.4	32516.2	1	1
L-GLUTAMATE_GAMMA-SEMIALDEHYDE	L-glutamate-5-semialdehyde	1	1	1	1	1	1	1	1	1	1	1	1	1	1	1	1	1	1	1	1	1	1	1	1	1	1	1	1	1	1	1	1	1	1	1	1	49715.9	51290.2	51365.8	57555.8	35258.5	42050.4	39571.2	37281.6	17560.5	17331.5	1	11572.7
L-HISTIDINOL-P	L-histidinol phosphate	130188	11196.2	11550.1	57604.6	16680.7	95825.5	57662.3	41478.4	11339.7	1	1	1	88160.1	16855.4	73978.6	77542.2	87999.6	89776	1	1	1	1	17722.9	1	19300	62273.3	10620.8	47519	1	37264.4	60162.5	59678.1	82178.8	80437.7	83638.8	1	29444.3	20685.5	22366.1	24022.8	27395.6	22829	11554.1	11837.7	25124.5	17905	11546.4	18138.5
L-HYOSCYAMINE	(<i>S</i>)-atropine	158260	160162	237586	242194	122818	118457	1	1	1	105226	19626	18495.1	141809	144752	175765	172903	1	1	1	1	121220	1	99404.5	11329	1	1	194344	190970	11368.8	12189.9	198482	206478	16316.4	11838.3	16897.2	11060.4	22973.2	24060.7	19423.8	24467.4	1	17133	56195.9	62524.4	200094	189969	290721	1
LINAMARIN	linamarin	46138.4	10716.1	28564.2	69556.3	28060.8	30278.7	11581.4	11348.2	69257.5	88543.6	138723	143662	41974.3	84773.2	10904.8	37443.4	55051.3	69965.5	70192	111418	118138	71720.2	66500.1	107471	128905	117926	227132	230030	187599	184475	65431.1	82331.9	50471.5	53441.2	31352.4	53828.4	62769.7	104490	141814	149180	167741	174593	1	135053	246773	228826	315497	335330
LINOLEIC_ACID	linoleate	46786.1	37914.8	60889.6	64815.2	44955.3	42023.4	1	1	28256.8	26877.1	63752.5	56490.3	40048.4	48136.6	56471.1	59001.9	51344.3	46416.1	28496.6	19276.3	31824.7	32698.7	38240.1	43218.4	1	1	67119.9	66767.9	35150	36727.9	63832.4	66001.4	57112.9	57882	48829.7	46708	26692.9	29281.1	34806.4	35483	65467.9	62639.1	33791.9	37775.2	88602.6	88991.5	1	1
LINOLENIC_ACID	&alpha;-linolenate	70961.8	69671.4	74084.6	81797.7	74670.3	79773.8	49507.4	54689.3	215177	224474	58328.7	261354	82340.4	77977.9	77630	74934.7	63787.8	81272.1	1	223537	209052	229623	196894	204815	64069.9	74254.9	73716	67569.3	82665.5	74213.6	66044.7	77081.6	63245.9	69270.2	77696.3	71648.3	67378.3	65009	85905.7	82747.5	89733.9	78890.9	68208	55301.7	59528.8	52747.5	66649	70418.5
LIPOIC-ACID	(<i>R</i>)-lipoate	26774.9	24525.9	28340.7	27398.2	23963.2	22603.3	1	1	16671.9	17048.3	29367.3	22659.3	25316.8	26829.2	25614.4	28201.1	19901.5	20682.4	18216.4	19294.1	32103.3	21746	23396.3	18103.2	1	1	23363.5	24934.7	10587.8	1	28753.2	22138.1	26183.7	25142.3	18131.7	19887	17686.8	16568.5	11353.6	11669.9	1	18209.4	18031.9	17410.6	17579.4	23439.5	20797.3	20608
L-LACTATE	(<i>S</i>)-lactate	1	1	1	1	1	1	1	1	1	1	1	1	1	1	1	1	1	1	1	1	1	1	1	1	1	1	1	1	1	1	1	1	1	1	1	1	1	1	1	1	1	1	1	1	1	1	1	1
LOGANIN	loganin	705407	700435	711506	716692	489604	417846	202598	203560	536266	475286	862502	807371	791939	823186	657128	661942	775445	771678	676618	658974	742663	766673	656352	657124	609544	563108	1.10817e+06	1.10828e+06	724562	725551	718622	702470	782961	791214	713987	720982	483653	481492	535720	531432	707239	684917	589121	599337	765651	768435	962722	964414
L-PANTOATE	(R)-pantoate	41311	40554.9	75637.6	83232.1	1	19002.8	1	1	1	1	46397.9	38090.5	31558.4	32104.9	47183.9	43784.4	23569.2	18421.3	1	1	1	1	1	1	1	1	11047.7	1	1	1	66461.8	65322.2	48046.9	30568.8	20210.1	18272.9	54255.3	47779.6	60406.5	63481.7	82238.4	84465	147937	139220	266948	272147	228000	237698
L-PIPECOLATE	L-pipecolate	1	1	37783.8	19552.9	72806.9	95011.9	1	1	1	1	1	141459	24885.2	11691.5	1	88887.1	1	7212.86	1	1	107046	1	14014.5	16459.6	100974	134386	31216.8	1	1	1	18820.7	13419.7	1	1	13601.4	3190.63	244556	204114	303889	286756	274432	277415	14304	165.126	215062	1	159608	1
L-SELENOCYSTEINE	L-selenocysteine	148562	1	90556.3	85186.5	154279	1	210538	40584.5	104065	122394	74301.2	39436.3	92268.6	23371.6	36258.9	58209.5	97471.1	1	23610.5	115526	1	1	109900	7697.7	137907	96147.9	1	1	31857.1	1	1	80457.6	131874	1	135821	1	1	11431	1	35600	7420.03	1	1	1	10384.7	10518.2	17466.3	10736.4
MALONYL-COA	malonyl-CoA	1	1	1	1	1	1	1	1	1	1	18952.6	12918.6	1	1	1	1	17345.6	17088.8	1	1	10797.5	1	1	1	11328.4	1	1	1	27764.2	26938.8	10998.7	1	11302.7	10758.3	1	1	1	16066.3	1	1	1	1	10649.3	1	1	17147.2	1	1
MALTOTETRAOSE	maltotetraose	1	10704.2	26857.5	22358.3	1	1	1	1	1	1	28997.6	29702.7	11288.6	11990.6	10722.1	11166.3	20307.5	13699.6	1	1	1	10423.6	1	1	1	1	49253.1	49572.7	10996.3	10630.4	18482.7	18951.4	18017.3	19483.8	1	1	13705.7	1	12577.2	1	20197	15819.6	12517.5	12141.8	12306.2	10985.2	44377.2	44968
MALTOTRIOSE	maltotriose	12548.2	1	12349.6	12659.3	1	1	32890.4	28601.3	27918.4	25180.8	38558.6	37465.3	1	12709.1	1	1	1	1	20219.7	20027.7	13539.1	14830.6	12413.4	19974.5	111752	122314	131837	132003	99805.2	115083	14124.6	13236.7	1	1	13348.4	11601.2	1	1	1	1	1	1	1	1	55044.1	47821.4	39862.3	38387.7
MANNITOL	D-mannitol	40670.5	44435.6	31365.3	31223.1	36533.6	40790.1	11710.1	18249.8	31766.9	30308.7	24516.5	34252.3	29733.4	25257.1	1	23064	22956.2	1	32030.2	30604	39252.2	41317.3	38480.7	37899.3	15084	1	1	23262.8	30375	23818.4	1	1	1	1	1	1	1	1	1	1	1	1	1	1	1	1	1	1
MEK	butan-2-one	1	545146	578344	585497	417388	477846	291115	273130	723242	748532	875974	866764	661799	741727	770165	1	812245	802891	869258	839555	1.27906e+06	1.31602e+06	1.42388e+06	1.61392e+06	370672	1	726329	668166	822843	1	926024	971609	1.31848e+06	1.18426e+06	1.10784e+06	1.1561e+06	852174	862805	865258	885387	837480	814493	934776	922396	869171	856146	817862	816404
MET	L-methionine	618858	602607	776786	748992	556934	591669	165588	159527	416194	435814	557364	544768	811231	834208	843178	859395	839374	805939	511171	477196	537320	563710	441245	528317	393999	382892	514345	542381	475290	435124	680547	662213	660452	634874	727071	672008	78929.6	79953.5	71145.9	83240.1	99083.9	95597.2	31402.3	25882.4	33952.9	24360.3	48136.2	41515.1
MEVALONATE	(<i>R</i>)-mevalonate	41311	40554.9	75637.6	83232.1	1	19002.8	1	1	1	1	46397.9	38090.5	31558.4	32104.9	47183.9	43784.4	23569.2	18421.3	1	1	1	1	1	1	1	1	11047.7	1	1	1	66461.8	65322.2	48046.9	30568.8	20210.1	18272.9	54255.3	47779.6	60406.5	63481.7	82238.4	84465	147937	139220	266948	272147	228000	237698
MI-HEXAKISPHOSPHATE	phytate	41107.8	36181.8	46555.4	51742.3	34972.4	33912.3	1	1	44322.8	37989.8	58830.7	61970.9	56208.4	59580.4	57043	62099.9	56955.7	57782.2	43244.7	37611.9	48033.2	49424.3	44884.7	43144.9	1	1	49880	51913.9	34368.7	35406.3	61094.2	61848.3	47395	44072.7	50302.7	44312.9	1	1	1	1	1	1	1	1	1	1	1	1
MONOTRANS-CIS-DECAPRENYL-GROUP	mono-<i>trans</i>, poly-<i>cis</i>-decaprenyl group	65048.5	64092.3	48300.3	56588	33917.1	30855.3	29015.7	28687	44442.9	51384	102625	91794.7	59668.8	58450.6	55595.4	65263.6	11686.2	97953.3	49033.5	55590.3	57168	60888.1	43109.6	45225.5	62616.7	72325.7	11472.6	80866.4	106156	106758	72304.1	69437	85125.7	78380.6	63425.4	64387.6	79286.1	75517.9	63198.8	68300.8	64179.6	66533.9	65155.8	72111.7	73635.2	80347.7	78230.6	84151.4
MORPHINE	morphine	1228241	3.98898e+06	1.44337e+06	1.47786e+06	3979311	930453	637604	628810	1.00487e+06	1.03965e+06	1.31889e+06	1.24657e+06	3491184	1.35107e+06	3.70031e+06	1.60257e+06	3.69226e+06	3.41098e+06	1.19016e+06	1.15523e+06	1.39408e+06	1.40877e+06	601894	614668	2.38602e+06	3.27094e+06	4.06293e+06	3.96842e+06	3.72957e+06	3.75315e+06	3.70209e+06	3.74187e+06	3.68379e+06	3.67138e+06	3.07283e+06	3.02763e+06	1.92615e+06	2.01085e+06	4354152	4.1794e+06	4.5448e+06	4.19087e+06	4248701	4401263	5093869	1.26539e+06	8.14575e+06	1.45228e+06
MPBQ	2-methyl-6-phytyl-1,4-benzoquinol	79316.1	1	71034.6	1	34369.8	1	11293.8	33313.5	1	1	156217	160571	1	54921.1	1	1	1	18109	1	1	1	1	1	1	1	1	1	1	1	113523	1	1	1	1	1	1	49746	75833.7	1	1	1	1	78379.9	1	1	71684.2	79951.6	1
MYO-INOSITOL	<I>myo</I>-inositol	820412	878758	1.25882e+06	1.22293e+06	310300	65275.3	47496.3	26202.3	2134499	985698	107029	907661	1.14597e+06	639575	1.17112e+06	1.20168e+06	1.01073e+06	987522	296172	249093	268654	180608	132094	186752	81539	127229	1	133984	132312	119542	407991	519398	388860	31467.5	350478	353424	1167135	1.00522e+06	1.04997e+06	961638	1099263	1.07598e+06	1.39765e+06	1.39441e+06	1.36252e+06	1.41268e+06	1.58136e+06	1.51725e+06
N-ACETYL-5-METHOXY-TRYPTAMINE	melatonin	1	1	1	1	1	1	1	1	1	1	64401.7	56014.7	1	1	1	1	1	28369.6	1	1	1	1	1	1	1	1	10419.9	1	1	1	37158.7	43833.1	1	1	1	1	1	10711.6	10784.3	1	55039.9	36566.1	1	1	10413.7	1	56805.2	64675.9
N-ACETYL-BETA-GLUCOSAMINYLAMINE	<i>N</i>-acetyl-&beta;-glucosaminylamine	335267	346092	1	148024	86710.1	71725.7	67794.2	71775.6	103891	107669	170902	176851	121050	106894	113793	126768	192406	185399	131476	129850	96784.9	109959	98248.6	99165	138609	146946	168911	161426	172685	181344	288101	282671	157157	145207	120897	124078	305833	282147	144296	130686	137185	138856	159672	157755	146825	156913	1	1
N-ACETYL-GLUTAMYL-P	<i>N</i>-acetylglutamyl-phosphate	542291	518162	532052	555498	477112	520662	182952	169079	258754	292920	353812	359172	517456	557669	578789	597375	505802	475116	327260	308422	350104	351675	292912	355474	247992	256168	387880	428852	384443	351264	520843	495232	484974	439076	441119	406405	368804	381892	385228	417192	436513	431359	315149	302250	331903	335989	356394	351601
N-ACETYL-SEROTONIN	<i>N</i>-acetyl-serotonin	1	1	1	1	1	1	1	1	1	1	1	1	1	1	18099.7	18218.7	1	1	1	1	1	1	1	1	17711.7	16390	1	11008.2	1	1	1	1	1	1	1	1	1	1	1	1	1	1	1	1	1	1	1	1
NADPH	NADPH	53457.7	50874.3	45002.2	41896.3	31990	36162	22327.6	23102.1	43534.7	43438.4	92025.3	97380.6	49523.7	45998.2	69507.7	55651.5	103420	87369.3	52093.8	44511.9	59022.9	68636.6	42425.4	43723.7	71858.8	61444.4	72511.2	69980.8	134776	136136	71209.6	77355.2	83935.7	70246.7	63210.9	63737.6	46102	79421.1	33453.6	33270.6	38739	31278.1	64790.6	81373.2	70815.3	51849.7	49309.6	45515.9
NARINGENIN-CMPD	(2<i>S</i>)-naringenin	107480	101635	40245.1	29710.2	65539.6	61541.8	64880	58605.1	28332.8	26453.5	14276.1	15361.3	40862.8	43617.1	31957.5	20344.7	26841.3	25250.6	32217.9	31667.2	41605.6	44122.4	29482.8	31624.9	38792.5	34700.6	17770.4	15420.4	38398.8	38922.3	23744.1	22895.2	39048.4	38796.8	37743.1	47054.4	22367.3	44889.7	35570	17268	1	1	66334	62702	48776.4	42729.6	11513.8	18260.4
NEOKESTOSE	neokestose	12548.2	1	12349.6	12659.3	1	1	32890.4	28601.3	27918.4	25180.8	38558.6	37465.3	1	12709.1	1	1	1	1	20219.7	20027.7	13539.1	14830.6	12413.4	19974.5	111752	122314	131837	132003	99805.2	115083	14124.6	13236.7	1	1	13348.4	11601.2	1	1	1	1	1	1	1	1	55044.1	47821.4	39862.3	38387.7
NEUROSPORENE	<i>all-trans</i> neurosporene	166381	158136	171016	179173	1	121056	1	1	138519	148832	243182	236688	173421	178299	172698	162918	133610	1	183457	171987	165887	193962	175372	167100	1	90947.1	173358	179014	157787	163203	197303	200321	183979	180277	177891	171790	1	130683	130076	121816	163587	171385	1	128970	1	1	165348	154914
NIACINAMIDE	nicotinamide	1	1	1	1	233918	119871	347669	304723	81311.3	86627	65427.5	74323.2	1	74743.4	1	56391.3	62154.6	57860.5	85012.6	110173	1	42296.5	75269.9	90266.3	364859	335538	97395.9	107562	86435.3	1	48683.8	1	1	1	76818.1	1	97907.5	87512.6	179955	104203	130050	100792	82386.5	63257.5	74821.9	43317.5	31215.5	52942.3
NICOTINE	(<i>S</i>)-nicotine	1	1	1	1	1	1	1	1	1	1	1	1	1	1	1	1	1	1	1	1	1	1	1	1	1	1	1	1	1	1	1	1	1	1	1	1	1	1	1	1	1	1	1	1	22464.8	18440.6	16690.8	11048.3
NMNH	reduced &beta;-nicotinamide D-ribonucleotide	1	1	38304.3	44821	1	1	1	1	41611.1	38516.9	31635.7	41902	17377.2	30617.1	33327	48377.3	42880.3	41089.5	37109.5	42029.7	32580	32712.8	32607.9	18505.5	1	1	53354.7	53215.1	44588.8	48781.6	47155.7	44962.1	11316.4	11232.6	23469.2	17874.5	22921.9	50123.3	47594.8	44520.8	63821.5	60192.7	11964.3	24047.3	26050.3	71524.6	101175	103982
NONAPRENYL-4-HYDROXYBENZOATE	3-nonaprenyl-4-hydroxybenzoate	384344	344906	395385	390732	315725	302808	206410	1	1.20163e+06	1.20604e+06	1	1	431286	413315	1	225179	1.06457e+06	1.0477e+06	1.12062e+06	1.10619e+06	1.39294e+06	1.45861e+06	1.19717e+06	1.14135e+06	615952	605718	1280749	1.23415e+06	564194	530652	524568	473811	1.1939e+06	1.16375e+06	1109284	1.14109e+06	705370	723185	823596	815506	535840	507298	713959	693960	1.52563e+06	1.552e+06	715263	717368
NUKED-PENTOSE-RING	nt-pentose-ring	81004.1	85881.3	49318.5	46022.9	36999.2	33238	1	1	1	1	1	1	17508.5	23562.5	30001	33845.7	22413.4	11267.4	10170.2	1	1	1	1	1	1	1	1	1	1	1	1	1	1	1	1	1	1	1	1	1	1	1	1	1	1	1	1	1
OBTUSIFOLIOL	obtusifoliol	1	54620.3	48835.1	50479.3	40340.2	47836.9	43398	41148.8	58515.4	55306.8	98288.8	93634.6	55058.7	56783.3	52432.6	52608.6	1	94201.2	63167.8	55951.4	58761.6	59669.7	46460.7	53100.8	1	62000.2	80373.9	79637.1	111136	108928	1	1	65935.9	66768.3	53597.8	53234.3	53200.3	61762.2	45369.4	52569.9	55185	53569.1	82234	92737.1	77099.7	71944.1	61318.3	59080.8
OCTADEC-9-ENE-118-DIOIC-ACID	&alpha;,&omega;-9<i>Z</i>-octadecenedioate	11834.1	18776.2	1	1	1	1	1	1	12256.9	1	35614.8	30221.8	11197.9	16952	1	1	22683.7	26123.6	17140.4	1	17391.5	17081.6	10878.9	11207.3	18670	18176.6	20534.8	20560	27146.5	29175.1	13628.1	12636.5	20137.2	20028.9	11414.8	17067.7	10328.3	18807.6	10953.1	10474.7	1	10977.5	21154.3	20021.8	18243.1	19364.8	18521.9	12658.1
OCTANOL	1-octanol	109214	105500	137819	144738	10935.4	18677.7	1	1	1	17998.7	98737.5	47455.1	51088.4	97952.4	62928.7	118710	96910.7	102122	10983.6	1	18373.9	12371.5	23882.5	24889.1	29728	1	138105	153755	108118	99834.3	110273	56857.7	103025	108681	98725.4	95988.1	12263.2	19000.7	42347.4	36328.2	69443.5	61056.8	16944.9	1	77402.4	65313.9	160993	148964
OCTAPRENYL-DIPHOSPHATE	all-<i>trans</i>-octaprenyl diphosphate	21532.2	16710.8	18424.4	12522.3	389554	370132	37669	36328.5	18200.1	12879.5	74408.7	74140.6	53941.1	49578.1	11989.3	12141.3	43106.6	30054.7	106021	98246	345165	330906	329260	996681	93811.7	103717	1664216	2534998	502347	1.3533e+06	68470.8	62647.3	600886	263829	801197	792086	12039.1	16932.8	1.67076e+06	1.67009e+06	1950462	1.94186e+06	31370.7	27036.7	2.53046e+06	2509294	3.26456e+06	3.20057e+06
OLEATE-CPD	oleate	155883	142871	64604.8	179328	123683	67339.7	59104	49263.9	119525	105965	192961	201562	136230	139150	157128	157445	148334	143996	45693.3	135369	148023	159758	48715.4	140044	53506.6	80182.7	186963	187131	132989	51734	74608.7	63741.1	165994	161332	136772	132226	129789	139166	137769	136063	180828	186189	55951.6	48811.8	217970	210871	262921	276631
ORCINOL-CPD	orcinol	1	45448.9	65282.8	10366.5	22361.8	19744.2	1	1	25044.7	25851.5	41022.6	61325	23336.8	18078.6	26719.6	28271.8	24721.2	23677.7	17346.2	22893.2	12104.9	30251.4	24272.3	24892	1	1	50858.6	39315.4	11317.3	12219.8	1	1	24455.8	26881.7	11479.9	11323.8	19455	17104.8	25041.6	22979.2	53224.1	60588	152340	1	137512	39138.7	400888	418147
O-SINAPOYLCHOLINE	<i>O</i>-sinapoylcholine	796426	778297	912498	906230	535535	533889	1	1	678201	643062	990857	960142	834397	859744	769535	767802	823098	811824	782038	752987	765527	786447	690841	716857	1	1	1.04702e+06	1.00374e+06	718681	708722	858638	848518	902053	882344	728045	748983	394460	392786	437472	436149	599518	584489	421036	440366	522155	501286	653074	634377
OXALACETIC_ACID	oxaloacetate	11297.8	1	1	1	1	1	1	18257.8	25215.5	29665.3	1	1	1	1	1	1	1	1	25880.2	13775.6	25863.8	26492.4	1	1	1	1	1	1	1	1	1	1	1	1	1	1	1	1	1	1	1	1	1	1	1	1	1	1
OXIDIZED-GLUTATHIONE	glutathione disulfide	3.25983e+06	3.31203e+06	1.70184e+06	1.76876e+06	921418	949949	590422	605980	2594936	2.33578e+06	1.78634e+06	1.74985e+06	2.15593e+06	2.18004e+06	2.83184e+06	2.76875e+06	2323002	2.21016e+06	1.85414e+06	1.82096e+06	1.94858e+06	1.94176e+06	1.75039e+06	1.74493e+06	727055	650475	567007	577823	1	1	2.62494e+06	2.63051e+06	2.70314e+06	2.79618e+06	1.85905e+06	1.82309e+06	1.28981e+06	1.27569e+06	1.79732e+06	1.77764e+06	1867021	1.76724e+06	1.06346e+06	1.05205e+06	2048291	2.00892e+06	3105568	3096655
PALMITALDEHYDE	palmitaldehyde	32007.4	31156.4	28802.8	28287	1	1	1	1	1	1	1	1	1	1	1	11928.9	1	1	1	1	1	1	1	1	1	1	1	1	1	1	1	13618.6	1	1	1	1	1	1	1	1	1	1	1	1	1	1	1	1
PALMITATE	palmitate	363934	375772	155608	169881	95911.8	83251.1	65526.7	66706.5	108430	104739	178830	188565	136825	117916	131936	139696	217401	197447	129306	128606	103069	113122	104108	112274	138060	157934	172190	172054	186909	191970	300167	303093	156571	165981	130218	133623	348162	320091	165100	160543	160833	163066	168632	170116	150752	176079	176727	176852
P-AMINO-BENZOATE	4-aminobenzoate	303775	302863	204486	192471	157708	142697	57234.6	60194.1	68371.8	51995	77895.2	74988.6	106100	113692	135744	144856	122281	112259	56200.3	65574.6	32549.1	29679.7	1	1	131813	122953	124544	1	116011	109940	95615.3	105094	79822.6	69925.5	62519.3	66971	1	1	1	1	1	1	1	1	1	1	22461.3	31724.4
PANTETHEINE-P	4'-phosphopantetheine	1	1	1	1	1	1	1	1	1	1	1	1	1	1	1	1	1	1	1	11127.5	1	1	1	1	1	1	1	1	1	1	16499.9	11074.3	10940.1	28558.8	1	1	1	1	1	1	1	1	1	1	1	1	1	1
PANTOTHENATE	(<i>R</i>)-pantothenate	1	1	1	1	1	1	1	1	1	1	1	1	1	1	18099.7	18218.7	1	1	1	1	1	1	1	1	17711.7	16390	1	11008.2	1	1	1	1	1	1	1	1	1	1	1	1	1	1	1	1	1	1	1	1
PHE	L-phenylalanine	2.22238e+06	2.18127e+06	2.95349e+06	2.9022e+06	1.60097e+06	1.60407e+06	593452	597735	1.325e+06	1256394	2221363	2.2184e+06	2027523	2110897	2334134	2.31265e+06	1903223	1.84375e+06	1.26518e+06	1.22129e+06	1.49532e+06	1.50179e+06	1225979	1.16688e+06	748280	695561	1.54526e+06	1.51607e+06	1.10553e+06	1.08628e+06	2547336	2.56129e+06	1.99113e+06	1.96788e+06	1.80077e+06	1.85339e+06	2.53328e+06	2570839	2583240	2610383	3.3343e+06	3.34622e+06	5.43448e+06	5.2494e+06	9247369	9410495	8036402	8050169
PHENYLACETALDEHYDE	phenylacetaldehyde	13972312	15242505	13184967	1	9986147	9996219	6.58711e+06	6663947	1	13369540	11547923	11766241	13433927	1	1	13023074	12719957	12564647	10341199	10045060	1	11292870	11261309	11253737	11291622	11294574	13542861	13710268	12691466	12430417	12549727	12701695	13348318	13343307	11806642	11684069	7080640	7118674	8.10254e+06	8.06752e+06	6.59143e+06	6492763	5.93388e+06	5898409	7476882	7.39996e+06	5.58602e+06	5936456
PHENYLACETONITRILE	phenylacetonitrile	25128.4	20004	11930.6	11312.7	248712	252515	106756	95370.2	23407.2	17799.9	11809.2	341807	11635.7	18466.4	17110.5	15975.5	286615	11436.2	10917	11358.8	16579.8	12603	12732.6	17395.3	167298	12060	19774.1	18241.1	11880.7	207497	10732.9	392229	32505.6	316689	16846.3	16263.4	360038	370810	21604.2	365081	16578.5	438188	31933.5	641132	1.13281e+06	1.15225e+06	993583	995440
PHENYLACETOTHIOHYDROXIMATE	(<i>Z</i>)-2-phenyl-1-thioacetohydroximate	41642.3	39202.7	25950.3	23265.5	100306	112814	84758.9	80324.4	40446.1	60021.1	15807.1	10773.4	40048.6	44648.8	36064.7	50915.9	28293.1	40926.6	50281.5	41858.5	36589.9	18990.2	24544.3	60693.5	103310	95863.8	37075.5	41441.5	83437.9	51850.9	1	1	27279.2	27903.7	43419.4	31513.5	1	1	1	1	1	1	1	1	1	1	1	1
PHENYLETHYLAMINE	2-phenylethylamine	1	1	1	1	1	1	1	1	95518	82109.4	133244	132083	1	1	1	1	1	1	78180.4	77656.9	113566	116778	106735	106059	1	1	1	1	1	1	1	1	1	1	1	1	1	1	1	1	1	1	1	1	1	1	1	1
PHLORETIN	phloretin	1	1	1	1	1	219553	1	1	1	1	506964	482216	1	1	233929	1	1	291012	1	1	1	1	1	1	1	1	501630	504250	361947	1	287573	292248	320517	295914	336286	339172	86595.9	81446.2	89927	99790.7	163340	169802	130513	130733	138291	137183	97484.5	104830
PHOSPHO-ENOL-PYRUVATE	phospho<i>enol</i>pyruvate	29037.3	28100.2	39659.9	46787.5	26977.7	25206.6	1	1	10753	10895.2	14172.3	15007.5	39156.8	47666.5	47297.6	45317.9	49474.2	49983.9	1	1	13866.6	13781	11141.7	12915.7	1	1	16376.2	16000.6	13775.7	13625.3	42520	46785.6	39091.1	33142.5	43764.2	45993.3	1	1	1	1	1	1	1	1	1	1	1	1
PHOSPHOPANTOTHEINE-GROUP	4'-phosphopantetheine group	1	1	1	1	1	1	1	1	1	1	1	1	1	1	1	1	1	1	1	11127.5	1	1	1	1	1	1	1	1	1	1	16499.9	11074.3	10940.1	28558.8	1	1	1	1	1	1	1	1	1	1	1	1	1	1
PHOSPHORIBOSYL-AMP	1-(5-phospho-&beta;-D-ribosyl)-AMP	20761.5	20620.7	18570.6	14328.4	16728.7	11583.9	11045.5	10661	19842.3	13437.3	35078.2	32725	18614.1	21368	26197.6	26556.9	36960.4	32584.6	18883.4	18508.4	23460.7	30743.6	22826.6	20183.1	36629.4	28717.8	28429.7	21531.7	48188.8	52056.2	29557	24831.5	30536.2	31152.5	21689.2	27223.2	27583.4	31409.4	12163	12102.5	17602	17645.6	27367.8	28052.8	21577.5	20009.4	13203.5	19533.7
PHOSPHORIBOSYL-ATP	1-(5-phospho-&beta;-D-ribosyl)-ATP	27169.6	24084	28549.8	27908.5	17605.8	16957.4	1	1	25898.9	19658.9	47817.9	45527	25729.6	28264.2	40457.9	29554.7	60396.7	50940.8	26645.2	20966	31176.5	30773.4	26689.5	20096.4	30212.3	44512.1	38310.4	32560.1	76299.4	76362.1	39756.3	49719.3	72469.1	40586	29912.1	42459.1	31206.4	46432.4	17145.3	17624.2	19196	17231.6	34572.7	35102.1	50111.3	30061.9	23297.4	27680
PHOSPHORIBOSYL-FORMIMINO-AICAR-P	1-(5-phospho-&beta;-D-ribosyl)-5-[(5-phosphoribosylamino)methylideneamino]imidazole-4-carboxamide	74740.5	69661.8	64540.6	73095.5	46117.2	66150.4	38989.4	45518.6	73096.2	54199.5	101421	103884	63743	66595.6	77862.9	74577.4	101455	99563.2	72614.6	64621.3	83463.2	89000.3	57305.1	60676.2	96491.6	85391.3	72571.7	71261.1	126536	124190	96763.9	84148.1	84360.2	87062.7	77418.6	69985.2	35888.2	77341.1	25262.2	24298.1	34963.7	30162.3	78530.6	73572.6	78842.7	68151.2	51119.3	51310.4
PHOSPHORIBULOSYL-FORMIMINO-AICAR-P	phosphoribulosylformimino-AICAR-phosphate	74740.5	69661.8	64540.6	73095.5	46117.2	66150.4	38989.4	45518.6	73096.2	54199.5	101421	103884	63743	66595.6	77862.9	74577.4	101455	99563.2	72614.6	64621.3	83463.2	89000.3	57305.1	60676.2	96491.6	85391.3	72571.7	71261.1	126536	124190	96763.9	84148.1	84360.2	87062.7	77418.6	69985.2	35888.2	77341.1	25262.2	24298.1	34963.7	30162.3	78530.6	73572.6	78842.7	68151.2	51119.3	51310.4
PHOSPHORYL-CHOLINE	phosphocholine	17475.3	17163	12197.7	1	1	1	1	1	1	1	1	1	13881.8	13016.7	1	11592.1	11846.2	1	1	1	1	1	1	1	1	1	1	1	1	1	1	1	1	1	1	1	14770.7	14870.7	14019.4	20088.7	11230.1	1	17180	17102.7	10672	17352.2	1	1
PHYTOALEXIN-CMPD	psoralen	1.18142e+06	1.17659e+06	1.1416e+06	1.1583e+06	967165	919231	389628	396718	659637	651209	933294	948872	1.04231e+06	1.06031e+06	1.05597e+06	1.0827e+06	908842	949387	802683	774446	904868	897959	744115	732318	467899	420429	892262	831011	697430	720065	1149651	1.14322e+06	952874	989582	808352	841712	995735	969127	984388	960162	997637	998308	858766	896434	939313	964109	982855	984776
PHYTOL	phytol	59412.4	65114.6	189411	204228	79242.7	74792	64670.9	63451.9	58251.2	57951.6	123408	1	1	1	217418	214483	150518	151380	1	1	87817.1	91107.9	42608.7	42665.7	305146	297958	299257	276847	1	1	1	1	56559.1	57918.1	63984.5	68466	128850	123773	122279	134526	83245.6	79601.3	1	233124	192330	199466	1	184943
PHYTOSPINGOSINE	phytosphingosine (C18)	1	1	227309	233985	46407.5	48989	48934.6	45760.5	1	90809.5	1	1	321808	321438	1	79506.7	1	1	573681	573553	51069	41208.2	50696	53310.9	338633	339997	32481.3	66800.4	1	1	399813	389568	1	106861	91079.3	93209.1	206133	212410	152839	131888	166812	163116	142377	142796	110836	170065	100322	235311
PHYTYL-PYROPHOSPHATE	phytyl diphosphate	61973.9	64208.1	27649.7	27909.2	1	1	1	1	42833.7	40983	50814.2	46596.4	22226.6	22476.3	48746.1	55693.4	31552.2	31738	37809.2	38183.4	36990.9	42834.4	26916.4	27961.2	1	1	32885.1	40751.5	1	1	53627.3	54460.2	73741	74120.8	43615.7	43782.5	44308.9	39832.2	61366.6	58587.9	65355.5	63188.2	54869.6	50452.2	154333	141858	180705	182798
POLYNEURIDINE-ALDEHYDE	polyneuridine aldehyde	45264	54434.1	73043	70255.3	1	25949.6	1	1	29032.5	25652.6	45404.9	46117	52692.7	71904.2	57971.9	52251	61633	58993.1	27907.8	22450.6	35134.6	30505.5	21785.2	21777.5	19819.1	20256.7	20682.2	19198.9	29218.4	28112.2	91021.4	87739.7	55512.3	67209.7	48554.3	54021.4	22823.2	28764.7	26612.8	30483.4	60465.5	54323	32838.1	29995.4	51483.8	54416.3	93444.2	85590.3
PORPHYRIN-RING	porphyrin-ring	1	16572.5	16916.6	18286.7	1	1	1	1	16912.5	1	16624.4	26806.6	17223.7	28911.1	1	16398.6	11979.9	11148.4	1	1	11998.6	29039.2	1	11688.9	10607	1	110302	107103	64384.1	51494.1	42073.8	65967.2	17167.1	11935.2	1	11306.4	66189.5	75495.5	90148.7	89581.8	135608	124404	81487.8	86167.2	132403	139061	200476	201901
PRENAL	3-methyl-2-butenal	45151.8	30744.1	1	1	51223.1	43148.2	29690.3	33183.6	61021.1	35094.2	65213.3	51080.3	1	54261.6	43794	57572.8	1	50950.5	43414.3	67655.5	46861.6	45733.2	60710.7	57429	29390.3	39807.9	57977.8	59190.1	46278.3	52384.2	47227.4	1	50513.8	56379.1	72983.8	56854.5	52152.5	46717	44999.4	44346.3	54616.2	58610.1	45195.7	40863.6	37123.2	46307.8	51464.4	40309.5
PRO	L-proline	122223568	121916304	123462776	122724248	109692248	111161624	68268352	65967128	109277088	111619096	141623760	140352880	113836696	116157560	113078072	114199928	120335112	118619176	124439288	122585512	128720080	129703224	122024584	128442048	99812176	100429024	142740480	146410976	126765808	122685400	123117160	121912832	123898888	121762200	121689616	119883408	128370184	131131200	134112168	137895120	124683568	123749800	112518456	111218776	104365952	103149568	85184568	85400584
PROGESTERONE	progesterone	2.9127e+06	2.8924e+06	127328	532152	118844	1	1.25066e+06	1.32898e+06	572181	551206	31203.8	139619	1288564	1.27142e+06	147825	159255	703399	669015	1.89805e+06	1.94485e+06	1	1	1	11117.6	7.19944e+06	7.24716e+06	218928	224078	765933	782761	1.01101e+06	949141	1	242342	1	96710.4	187290	169800	640255	637751	112715	119059	1.06436e+06	1.05935e+06	326423	323573	198873	185398
PROPIONYL-COA	propanoyl-CoA	50339.2	60667.6	43639.3	51251.1	26832.4	11396.3	1	1	45237.5	37880.6	78625.6	92367.8	40221	52558.1	47912.1	53223.8	96252.7	89107.2	52932.6	44556.7	55666.6	56522	37009.5	42107.5	51760.7	54507.3	69881.4	63490.4	125715	128335	57138.5	54963.2	70622	70426.7	56401.7	56773	44866.7	65311.6	23656.8	29967.8	28929.4	35121.3	54584.5	52232.7	65839.2	54538.3	50358.2	52557
PROTOPORPHYRIN_IX	protoporphyrin IX	39443.6	40164.8	41233.4	47507.1	17942.2	23038.2	1	1	1	1	1	1	1	33472.7	40508.3	42280.8	30515.1	32781.3	1	1	1	1	1	1	17400.8	1	40911.9	39933.6	26011.8	32120.5	33829.9	40440.5	40804.9	45903.1	1	25409.8	1	1	1	10426.4	11062.2	10623.1	11274.5	22349.5	25642.1	24422.2	31854.1	29659.5
[truncated: 76 more rows]
[truncated: 29 more columns]

## Sheet: Dataset Root exudates
	Low salt																																				High salt
[truncated: 252 more rows]
[truncated: 28 more columns]
