# Supplementary material for: Integrated Metabolomics and Morpho-Biochemical Analyses Reveal a Better Performance of Azospirillum brasilense over Plant-Derived Biostimulants in Counteracting Salt Stress in Tomato
Source: Int J Mol Sci. 2022 Nov 17;23(22):14216. doi: 10.3390/ijms232214216 (PMC9698407; doi:10.3390/ijms232214216)
Supplement: Supplementary file 1 [file ijms-23-14216-s001.zip › Supplementary Table S4.xlsx]

## Sheet: Discriminant compounds
Compound	Log FC Ab	Log FC C	Log FC D	Log FC H	Log FC P	Log FC NaCl	Log FC NaCl+Ab	Log FC NaCl+C	Log FC NaCl+D	Log FC NaCl+H	Log FC NaCl+P
ethanolamine		0.38	0.44							0.35
butan-2-one			1.10		0.58			0.57		0.99	0.62
pyridine-ring								3.07	1.90
N-methyl-&Delta;<sup>1</sup>-pyrrolinium cation	1.01	1.11	1.44				-1.65	-1.13	-1.08	-1.59
diacetyl										0.33
1-pentan-3-one							-3.58
2-aminoprop-2-enoate		4.00	4.00
(<i>E</i>)-2-methylpropanal-oxime			1.65
4-aminobutanal						1.54
toluene							2.57		1.39		2.31
(Z)-3-hexanal							-1.30
(2Z)-2-aminobut-2-enoate	1.05	-4.00	-4.00	-4.00	-0.70	-4.00	-4.00	-4.00	-4.00	-4.00	-4.00
3-methyl-4-<i>cis</i>-hydroxy-2-butenal		-0.66					-0.95			-0.52	-0.72
2-oxobutanoate								2.68
1-aminocyclopropane-1-carboxylate						-2.26	-3.30	-2.09	-3.79	-1.92	-2.74
isovalerate		-0.43					-0.86				-0.54
ethyl propanoate			5.72
urea-1-carboxylate		0.59	0.67	0.98	0.50	-4.00	-4.00	-4.00	-4.00	-4.00	-4.00
<i>N,N</i>-dimethylglycine		-1.62	-1.48		-1.06	-1.59	-1.84	-1.45	-1.28	-2.14	-1.74
choline						1.36	3.80	1.61	3.43		3.48
<i>N</i>-methylputrescine	0.64	-4.00	-4.00	0.51	-4.00	-4.00	-4.00	-4.00	-4.00	-4.00	-4.00
D-serine							-1.24
benzaldehyde		0.61	0.71			0.55
benzyl alcohol						0.78	1.03			1.15	0.99
catechol						-4.00	-4.00	-2.14	-1.91	-4.00	-4.00
uracil	1.07		-1.35			-1.05	-1.82	-1.82	-4.00	-4.00	-2.34
histamine						-1.20	-1.34	-0.84	-1.33
3-methyl-2-oxobutanoate					-3.71
L-proline			0.55			0.54				0.53
succinate	1.05	-4.00	-4.00	-4.00	-0.70	-4.00	-4.00	-4.00	-4.00	-4.00	-4.00
L-aspartate 4-semialdehyde						-4.00	-4.00	-4.00	-4.00	-4.00	-4.00
indole							4.56
L-valine							-1.18	-0.74	-1.18	-0.54	-1.13
L-<I>allo</I>-threonine						-1.78	-3.59	-1.90	-2.80	-1.89	-2.98
phenylacetaldehyde						-0.45	-0.96	-0.49	-0.47
3-methyl-3-sulfanylbutan-1-ol			-2.31	-1.43	-0.92	-4.00	-4.00	-2.49	-4.00	-4.00	-4.00
salicylaldehyde			1.17
nicotinamide		1.55
2-phenylethanol						4.18	4.31	4.09	4.64	3.68	4.30
2-phenylethylamine		4.00	4.00								4.00
nitrobenzene			0.39				-0.65				-0.43
3-methylcatechol							2.84
phloroglucinol		0.99	0.84			0.65	0.74			0.70	0.71
1-piperideine-2-carboxylate				0.80
(2<i>Z</i>,4<i>Z</i>)-2-hydroxyhexa-2,4-dienoate		1.05	1.01			0.63	0.66			0.65	0.75
(<i>E</i>)-glutaconate			0.39							0.58	0.34
furaneol (enol form)		-0.63	-0.52				-0.92
1-octanal							-0.81
4-methyl-2-oxopentanoate										-1.84
1-octanol			-1.87
<i>N</i>-carbamoylsarcosine								1.04
<i>cis</i>-4-hydroxy-D-proline						4.00	4.00	4.00		4.00
L-leucine						-1.10	-1.62	-0.99	-0.98	-1.31	-1.36
pteridine-ring		1.49		1.78		1.99	2.16	2.27	1.86	2.03	1.69
L-asparagine							-2.18		-1.51
<i>N</i>-hydroxy-L-valine		2.67		1.20	-0.13	-4.00	-4.00	-4.00	-4.00	-4.00	-4.00
(<i>S</i>)-ureidoglycolate	-0.67	-3.05	-2.73	-0.37		-4.24	-4.64		-2.78	-3.99	-3.45
indolin-2-one							-1.86	-1.60	-1.76	-1.38	-1.62
(<i>S</i>)-ureidoglycine		1.80		2.48
nt-pentose-ring		-4.00	-0.74	-4.00	-4.00	-4.00	-4.00	-4.00	-4.00	-4.00	-4.00
adenine-ring			-2.69
hypoxanthine	0.90		-1.11		-0.61	-4.00	-2.23	-1.16	-4.00	-1.49	-1.73
(4-hydroxyphenyl)acetaldehyde	4.00			4.00			4.00	4.00	4.00
2-nitrotoluene		0.33	0.55				-0.67
<i>N,N</i>-dimethylaniline-<i>N</i>-oxide	-0.80			-1.44		-2.69	-2.65	-2.61	-2.37	-1.70	-2.25
<i>cis</i>-dienelactone			-4.00						-1.74	-4.00	-1.19
3,5-dihydroxyanisole			2.01
pseudotropine			1.49	1.40		1.94	2.50			2.02
(<i>S</i>)-2-aceto-2-hydroxybutanoate				-1.38			1.80		1.45		1.53
coumarin							3.20				3.08
L-glutamine		-0.74				-1.47	-2.73	-1.62	-2.70	-1.15	-2.50
4-(methylsulfanyl)-2-oxobutanoate	-0.79			1.45				0.18			-0.85
<i>O</i>-acetyl-L-serine						-1.29	-2.57	-1.35	-2.01	-1.31	-2.06
(<i>R</i>)-mevalonate						1.41	2.80	1.24	2.40		2.49
D-arabinono-1,4-lactone		1.43		1.11
4-coumaraldehyde						-1.35	-2.66	-1.37	-2.01	-1.29	-2.06
phenylglyoxylate						-4.00	-4.00	-4.00	-4.00	-4.00	-4.00
5,6-dihydroxyindole	-1.83	-2.96	-2.10	-2.39	-1.70	-2.58	-4.24	-2.28	-2.80	-2.96	-3.81
L-methionine		-0.78		-0.68		-2.93	-4.59	-2.63	-3.15	-3.32	-4.17
4-coumaryl alcohol				3.97	3.77
(-)-isopiperitenone				-1.05		0.79	1.88		1.47		1.62
guanine				1.42				-1.70	-1.51	-2.38	-1.94
methylsalicylate							4.00		4.00	4.00	4.00
3,5-dimethoxytoluene	1.38	-4.00	-4.00	-4.00	-4.00	-4.00	-4.00	-4.00	-4.00	-4.00	-4.00
gentisate						1.34	0.84	1.26	1.64	1.29	1.23
N-methylethanolamine phosphate						1.38	1.02	1.36	1.84	1.33	1.51
L-histidine		1.13	1.49					2.09	1.99
2-maleylacetate						-2.57	-3.13	-4.00	-4.00	-4.00	-4.00
2-isopropylmaleate		-4.00	-0.74	-4.00	-4.00	-4.00	-4.00	-4.00	-4.00	-4.00	-4.00
2-oxoadipate			-1.01			-4.00	-4.00	-4.00	-4.00	-4.00	-4.00
(<i>S</i>)-(+)-allantoin		-4.00	-4.00	-0.61		-0.79	-4.00
3,4-dichloroaniline						4.00	4.00	4.00	4.00	4.00	4.00
2-dehydro-3-deoxy-L-rhamnonate						-1.66	-1.73				-3.09
4-oxo-4-(pyridin-3-yl)butanal						1.64
eugenol								2.36		2.41
phospho<i>enol</i>pyruvate		-1.71	-1.40	-1.52		-4.00	-4.00	-4.00	-4.00	-4.00	-4.00
L-methionine-(<i>S</i>)-<i>S</i>-oxide		0.18				-4.00	-4.00	-4.00	-4.00	-4.00	-4.00
HBOA		0.18				-4.00	-4.00	-4.00	-4.00	-4.00	-4.00
L-phenylalanine				-0.77		0.81	1.88	0.60	1.51		1.62
(<i>Z</i>)-2-phenyl-1-thioacetohydroximate					-0.18	-4.00	-4.00	-4.00	-4.00	-4.00	-4.00
D-quinovitol				-1.05		0.79	1.88		1.47		1.62
(6<i>E</i>)-8-oxogeranial										-1.58
N-dimethylethanolamine phosphate						2.53	3.28
1,3,5-trimethoxybenzene		-1.09				-4.00	-4.00	-4.00	-4.00	-4.00	-4.00
(<i>S</i>)-2,3,4,5-tetrahydrodipicolinate						4.00	4.00	4.00	4.00	4.00	4.00
2-undecanone				0.83		0.68		1.12	0.69	1.31	1.23
<i>cis</i>-aconitate	-0.13		-0.34	0.68	0.09	-4.00	-4.00	-4.00	-4.00	-4.00	-4.00
(indol-3-yl)acetate		0.51	0.58					-0.59			-0.65
(2<i>S</i>)-2-isopropylmalate			0.60					-0.59	-0.31		-0.65
allantoate		0.87	0.57			0.64				0.52	0.66
L-citrulline						-3.71	-5.23	-3.61	-6.54	-2.99	-5.09
L-arginine		0.50	0.53
4-methylumbelliferone	0.95
D-alanyl-D-serine								4.00		4.00
cinnamyl acetate							-1.34	-1.68	-1.75	-1.91	-1.29
isomethyleugenol						2.08	2.28			1.89	3.49
coniferyl alcohol radical		0.55
<I>myo</I>-inositol			-1.82	-2.91	-1.92
coniferyl alcohol									-2.44	-2.44	-2.16
preQ<sub>1</sub>						-2.38		-3.07	-3.11	-2.74	-2.23
olivetol			1.02
3-phosphooxypyruvate	-0.58					-0.96	-4.00	-4.00	-1.17	-1.03	-4.00
L-tyrosine							-2.58	-2.87		-2.18	-2.12
1-deoxy-L-glycero-tetrulose 4-phosphate					-0.18	-4.00	-4.00	-4.00	-4.00	-4.00	-4.00
phosphocholine						0.59		0.55	0.96	0.67	1.01
D-sorbitol	0.68	0.42	0.96		-4.00	-4.00	-4.00	-4.00	-4.00	-4.00	-4.00
<i>O</i>-phospho-L-serine								1.17
difluoromethylornithine						0.52
(<i>S</i>)-5-hydroxyisourate		-0.77	-0.51	-0.85		-1.63	-2.97	-2.11	-2.87	-1.24	-2.82
(E)-2-(methoxycarbonylmethyl)butenedioate		-0.59		-0.66		-4.00	-4.00	-4.00	-4.00	-4.00	-4.00
psoralen				-0.46		0.33				0.37
2,3-dioxo-L-gulonate		0.71
N<sup>&omega;</sup>-hydroxy-L-arginine				1.68
2,2,2,2'-tetra-fluoroacetophenone			-2.79				-3.35		-2.44		-2.64
dehydroascorbate (bicyclic form)		-2.56			-2.21	-2.09	-3.35	-2.10	-2.44		-2.64
L-dopachrome		-2.56			-2.21	-2.09	-3.35	-2.10	-2.44		-2.64
&beta;-ionone				0.83		0.68		1.12	0.69	1.31	1.23
(<i>E</i>)-&omega;-(methylsulfanyl)hexyl-thiohydroximate	0.91	-4.00	-4.00	-4.00		-4.00	-4.00	-4.00	-4.00	-4.00	-4.00
geranyl acetate		4.00	4.00		4.00				4.00
7-deoxyloganetate		-4.00	-4.00	-4.00					-4.00		-4.00
methyl ecgonone		0.55
(indol-3-yl)pyruvate						-4.00	-4.00	-4.07	-3.62	-2.11	-2.15
4-(indol-3-yl)butanoate								-1.35
1,4-dihydroxy-2-naphthoate			0.33	-0.39						0.41
L-tryptophan				-0.89		0.71	1.72	0.58	1.37		1.44
(Z,E)-&alpha;-farnesene										-0.70
(<i>R</i>)-lipoate											-0.89
&alpha;-monofluoromethylarginine		0.59	0.51
(<i>E</i>)-&omega;-(methylsulfanyl)heptyl-thiohydroximate		0.40
2-carboxy-L-<i>threo</i>-pentonate		0.54
sinapaldehyde											-1.70
3-hydroxy-&beta;-ionone			0.88	1.24		1.31	1.31	1.26	0.80	1.19
1,3,7-trimethylurate			0.56			1.83	1.12	2.16	1.09	1.97	1.80
1-deoxy-D-xylulose 5-phosphate								-0.59			-0.65
benzylbenzoate						4.00	4.00	4.00	4.00	4.00	4.00
4-phosphooxy-L-threonine		0.71	0.61
2-C-methyl-D-erythritol 4-phosphate		-0.82	-1.19				-1.51	-0.76		-1.20	-1.88
kinetin		-4.00	-0.12			-4.00	-4.00	-4.00	-4.00	-4.00	-4.00
4,9-dimethyldodeca-2,4,6,8,10-pentaene-1,12-dial							-1.79	-1.38	-1.92	-0.93	-1.48
<i>cis</i>-zeatin						-1.55				-1.86	-1.40
L-histidinol phosphate							-2.00
<i>N</i>-acetyl-&beta;-glucosaminylamine						0.74
(<i>2E,6E</i>)-farnesol		4.00	4.00		4.00				4.00
sinapate							-3.10	-2.62	-3.82	-2.77	-4.17
4-amino-4-deoxychorismate							-1.52	-2.18	-1.72	-3.24	-3.05
(2S)-flavanone						1.63	1.21	1.25	1.48		1.04
(-)-methyl jasmonate		0.63	0.52
<i>trans</i>-tuberonic acid		-0.31			0.01	-4.00	-4.00	-4.00	-4.00	-4.00	-4.00
(2S)-flavan-4-ol						0.83
5-phospho-&beta;-D-ribosylamine						4.00	4.00	4.00	4.00
4,5-<i>seco</i>-dopa		-0.53		-0.49			-0.64				-0.45
4-(&gamma;-L-glutamylamino)butanoate						-2.50
1,2-dibutyrin									1.36	0.93
melatonin								0.12	0.07	-0.41
inunolide				2.80			2.94	2.04		2.21
artemisinate				1.60
capsidiol				0.92		0.85	0.98			1.08	0.91
3-[(3a<i>S</i>,4<i>S</i>,7a<i>S</i>)-7a-methyl-1,5-dioxo-octahydro-1<i>H</i>-inden-4-yl]propanoate		-4.00	0.49			1.58	1.28	1.14	1.08	1.25	1.22
L-<i>erythro</i>-7,8-dihydrobiopterin							4.00	4.00	4.00		4.00
L-cystine						-3.10	-3.31	-3.66	-3.91	-3.83	-4.21
anserine		-1.57	-4.00			-1.08	-1.95	-1.30	-4.00	-4.00	-4.00
(6<i>R</i>)-L-<i>erythro</i>-5,6,7,8-tetrahydrobiopterin						4.00	4.00	4.00	4.00	4.00	4.00
3-oxo-myristate			4.00					4.00	4.00
prenyl diphosphate											-1.13
6-sulfo-&alpha;-D-quinovose		-0.55		-0.50			-0.66				-0.46
D-octopine			4.00						4.00
linamarin			1.50	2.24		1.96	2.54	1.99	1.76	2.33
&gamma;-L-glutamyl-L-cysteine						4.00	4.00			4.00	4.00
5'-deoxyadenosine				4.00				4.00		4.00	4.00
L-djenkolate				-1.16			-1.49	-2.55	-2.35	-2.59	-2.83
daidzein			4.00	4.00				4.00	4.00	4.00	4.00
7,8-dihydromonapterin		-0.69		-0.62		-0.97	-2.45	-3.47	-3.75	-4.28	-4.24
palmitate						0.81
a phenolic steroid				1.01
<i>sn</i>-glycero-3-phosphocholine		1.08	1.23	0.73		3.87	2.99	3.87	3.74	4.04	3.57
5-(methylsulfanyl)-ribulose 1-phosphate						1.36		2.56	1.56	1.56	1.66
&alpha;-D-glucosamine 1-phosphate				-1.58		-2.88	-2.10	-4.45	-5.32	-4.00	-6.28
13-apo-&beta;-carotenone								1.15	0.69		0.63
2,3-diphospho-D-glycerate						-4.00	-4.00	-4.00	-4.00	-4.00	-4.00
3-phospho-D-glyceroyl-phosphate								4.00	4.00	4.00	4.00
petivericin						1.06	1.39
<i>S</i>-(3-methylbutan-3-yl)-L-cysteinylglycine						1.63	1.85	1.18	1.48	1.78
<i>N</i>-acetylglutamyl-phosphate		-0.53		-0.49			-0.64				-0.45
1-nonadecene				-4.00
<i>S</i>-ribosyl-L-homocysteine								4.00		4.00	4.00
2'-deoxyguanosine	0.85		-1.00	0.92						-1.35	-1.12
6,7-dehydrobaicalein		1.13	1.78			-4.00	-4.00	-4.00	-4.00	-4.00	-4.00
16-oxo-palmitate							4.00		4.00	4.00	4.00
estrone				2.81
16-hydroxypalmitate				1.21
(S)-norcoclaurine				4.00				4.00		4.00	4.00
17&beta;-estradiol		0.86	0.67			0.61
2-carboxy-D-arabinitol 1-phosphate		-0.94		-0.54		-4.00	-4.00	-4.00	-4.00	-4.00	-4.00
L-saccharopine				4.00		4.00	4.00			4.00	4.00
&epsilon;-(&gamma;-L-glutamyl)-L-lysine		-2.27	-4.00	-4.00		-4.00	-4.00	-4.00	-4.00	-4.00	-4.00
5-amino-6-(D-ribitylamino)uracil			1.53		0.87				0.96
&alpha;-linolenate		1.09	1.93
queuine								4.00	4.00
p-coumaroyltyramine							5.00		3.66		5.57
genkwanin				4.00				4.00		4.00	4.00
benzoyl-&beta;-D-glucopyranose							-1.35	-0.79	-0.87		-1.27
androsta-1,4-diene-3,17-dione						4.00	4.00	4.00	4.00	4.00	4.00
<i>all-trans</i>-retinal						-1.37	-2.34	-2.61	-4.00	-1.97	-1.67
3-deoxy-D-arabino-heptulosonate 7-phosphate	0.65		0.83			-4.00	-4.00	-4.00	-4.00	-4.00	-4.00
(3R)-vestitone						-1.32
salicin											1.42
(indol-3-yl)acetyl-L-leucine			-1.14
(indol-3-yl)acetyl-L-aspartate		1.73		1.78		1.49	2.07	1.39	1.36	1.82	1.47
p-coumaroyltriacetate								4.00		4.00	4.00
EDTA							-1.45		-1.24		-1.24
furaneol glucopyranoside						4.00	4.00	4.00	4.00	4.00	4.00
17-&beta;-hydroxy-5-&alpha;-androstan-3-one		0.55	0.52	0.57
5-&alpha;-androstan-3&beta;,17&beta;-diol				0.46
8-[(1R,2R)-3-oxo-2-{(Z)-pent-2-enyl}cyclopentyl]octanoate			-2.00
18-oxo-oleate				2.12
phytol					-1.40
apigenin-7,4'-dimethyl ether									0.77
<i>N</i><sup>7</sup>-methylguanosine		0.93	0.88	1.15		2.00	1.82	1.46	1.42	1.69	1.21
salicylate &beta;-D-glucose ester						1.79
salidroside						-2.16					-1.32
(2<i>E</i>,6<i>E</i>)-farnesyl phosphate			4.00				4.00				4.00
9&alpha;-hydroxyandrosta-1,4-diene-3,17-dione								-0.58	-0.81	-0.22
(<i>S</i>)-6-<i>O</i>-methylnorlaudanosoline		0.74	0.66
sphinganine (C18)		0.61		0.48
(+)-taxifolin				-1.87
L-nicotianamine							-1.01	-0.78	-1.24	-1.03	-1.34
scopolamine		4.22	4.08			2.87
arachidonate				2.91
(indol-3-yl)acetyl-L-methionine		1.54					4.30		3.37		4.92
a glutathione group							-1.35	-0.76	-0.87		-1.27
(6S)-hydroxyhyoscyamine						-2.16				1.66	1.52
porphyrin-ring				1.88		2.92	3.09	3.41	3.32	3.52	2.92
9(<i>R</i>)-HPOTE						1.30	0.74	0.99	0.60	0.68	0.63
cinnamoyl-&beta;-D-glucoside		-3.31	-5.87
<i>O</i>-sinapoylcholine						-0.42	-0.58				-0.44
<i>N</i><sup>2</sup>-formyl-<i>N</i><sup>1</sup>-(5-phospho-&beta;-D-ribosyl)glycinamide		-4.00	-4.00	-0.61	-0.87	-4.00	-4.00	-4.00	-4.00	-4.00	-4.00
2-(formamido)-N<sup>1</sup>-(5-phospho-&beta;-D-ribosyl)acetamidine				4.00				4.00	4.00	4.00	4.00
7,8-dihydropteroate		-2.27	-4.00	-1.93		-4.00	-4.00	-4.00	-4.00	-4.00	-4.00
<i>N</i>-feruloyltyramine					3.69	2.95	6.47	4.25	5.87	4.66	6.89
3,4'-dimethylkaempferol			0.41
methylsalicylate-2-<i>O</i>-&beta;-<i>D</i>-glucoside				0.65			-0.68	-0.66	-0.73		-0.99
gibberellin A<sub>9</sub>			0.57			1.18	0.91	0.79	0.69	0.97	0.89
rhamnetin						1.84
2-<i>S</i>-cysteinyldopa								4.00	4.00	4.00
(<i>S</i>)-3'-hydroxy-<i>N</i>-methylcoclaurine						-2.14	-1.97	-2.06	-2.37	-1.84	-2.29
leukotriene A<sub>4</sub>									2.89	2.43
(4-octanoyl-5-oxo-2H-furan-3-yl)methyl phosphate						4.00	4.00	4.00	4.00	4.00	4.00
[(3S)-4-octanoyl-5-oxooxolan-3-yl]methyl phosphate	1.62	1.65	1.67	2.01		4.35	4.32	3.87	3.83	3.97	3.63
(indol-3-yl)acetyl-L-phenylalanine		-0.88	-0.87	-1.00		-1.36	-1.78	-1.71	-4.00	-4.00	-4.00
2-(8-hydroxy-2-oxotridecyl)-6-oxopyran-4-olate							1.40		1.17
6,7-dimethyl-8-(1-D-ribityl)lumazine		4.00	4.00				4.00				4.00
2-(2,8-dihydroxytridecyl)-6-oxopyran-4-olate		2.77	2.74
eugenyl-<i>O</i>-&beta;-<i>D</i>-glucopyranoside						3.56	4.17	2.63	3.34	2.76	3.57
(<i>S</i>)-scoulerine						3.98	4.62	3.04	3.76	3.19	4.02
(S)-corytuberine				-0.61		-1.21	-1.49	-0.90	-0.97	-0.83	-1.27
(9Z)-12,13,17-trihydroxyoctadeca-9-enoate			1.18		-0.97	-1.29	-1.64	-1.20	1.27	-1.11	-1.57
1-<i>O</i>-vanilloyl-&beta;-D-glucose									-2.17		-2.13
(+)-5-deoxystrigol				2.31
gibberellin A<sub>12</sub>						-1.48	-1.38		-0.70	-0.98	-0.77
sphinganine (C20)		1.80
gibberellin A<sub>4</sub>				1.13			0.93
9,10,18-trihydroxystearate						-2.19	-2.32	-2.62	-2.71	-2.50	-2.60
sanguinarine		1.01				1.56	1.27
(L-cysteinylglycin-<i>S</i>-yl)(1<i>H</i>-indol-3-yl)acetonitrile		1.01				1.56	1.27
[4-(6-methyloctanoyl)-5-oxo-2H-furan-3-yl]methyl phosphate						6.49
[(3S)-4-(6-methyloctanoyl)-5-oxooxolan-3-yl]methyl phosphate						1.81	1.81	1.97	1.87	1.89	1.77
vinorine		-4.00	-4.00			-4.00	-1.63	-0.88	-1.68	-0.83	-0.64
<i>N</i><sup>4</sup>-(&beta;-<i>N</i>-acetyl-D-glucosaminyl)-L-asparagine		-0.76				-4.00	-4.00	-4.00	-4.00	-4.00	-4.00
5-amino-1-(5-phospho-D-ribosyl)imidazole-4-carboxamide		0.18		0.44		-4.00	-4.00	-4.00	-4.00	-4.00	-4.00
(+)-7-<i>epi</i>-12-oxojasmonoyl-L-isoleucine			1.46
(indol-3-yl)acetyl-L-tyrosine		1.29	1.36	1.50			1.36	1.43	1.01	1.51
(+)-7-<i>epi</i>-12-hydroxyjasmonoyl-L-isoleucine		-1.01	-1.53	-1.42		-1.57		-4.00	-2.63	-4.00	-4.00
sucrose				-0.78		1.27	1.75		1.01	0.56	1.23
caffeoyl-4'-hydroxyphenyllactate								-1.97		-1.52	-1.56
gibberellin A<sub>34</sub>-catabolite						4.00	4.00	4.00	4.00	4.00	4.00
(<i>S</i>)-laudanine		0.81	0.76	1.03						0.77
CDTA		0.74	0.68
gibberellin A<sub>53</sub>									1.35		1.13
gibberellin A<sub>1</sub>						-1.00	-1.73			-1.27	-1.00
anandamide	-0.92			0.88		-4.00	-0.67	-0.40	-0.72	-4.00	-0.84
dihydrochelerythrine		4.00	4.00
polyneuridine aldehyde				-1.19
<i>trans</i>-zeatin riboside									1.35
(+)-7-<i>epi</i>-12-hydroxy-12-oxojasmonoyl-L-isoleucine		0.45	0.59	0.61						0.55
scopolin	-3.83		2.00		1.46		1.97			1.68	1.71
17-<i>O</i>-acetylnorajmaline						0.81
D-galactosylononitol		4.00		4.00				4.00		4.00
(+)-7-<i>epi</i>-jasmonoyl-L-phenylalanine	0.11	-0.61		-0.50		-4.00	-4.00	-4.00	-4.00	-4.00	-4.00
Fe(II)-nicotianamine		-0.21	-4.00	-0.77		-0.60	-0.57	-1.64	-0.99	-1.06	-0.78
(<i>S</i>)-laudanosine				1.63
cannabigerolate				-0.51		0.54			0.60
hydratedusnate				-0.73		-0.61	-0.56	-1.63	-1.00	-1.03	-0.80
(-)-lariciresinol				1.03			1.55	1.07	1.34	1.84	2.63
chelirubine						1.70				1.73
4,5&beta;-dihydrocortisone							-0.66
desulfoglucobrassicin			-2.02					-2.28
all-<i>trans</i>-geranyl-geranyl monophosphate								3.14	0.84	3.14	1.83
17-<i>O</i>-acetylajmaline								2.17	0.84	3.14	1.83
<i>N</i>-acetyl-D-muramate 6-phosphate	1.86	-4.00	-4.00	-4.00	-4.00	-4.00	-4.00	-4.00	-4.00	-4.00	-4.00
(-)-bursehernin										1.15
(+)-7-<i>epi</i>-12-hydroxyjasmonoyl-L-phenylalanine				2.46		3.02	3.60		2.13	3.32
7,3',4',5'-tetramethylmyricetin							-1.29		-0.82		-0.96
gibberellin A<sub>13</sub>		-1.13	-1.27	-1.24		-1.31	-1.24	-2.48	-2.19	-3.42	-2.67
<i>N</i><sup>7</sup>-methylguanosine 5'-phosphate		0.96	2.08		1.57		2.00			1.72	1.75
9-<i>cis</i>-10'-apo-&beta;-carotenal									2.65
reduced riboflavin								4.00	4.00	4.00
sphingosine 1-phosphate										1.47
aurachin C						0.97
<i>cis</i>-zeatin-<i>O</i>-glucoside						2.14	2.30	1.72	1.88	2.37	1.70
5&alpha;-cholesta-7,24-dien-3-one			-1.57		-1.96	-1.69	-1.71		-1.64	-1.56	-1.68
5-phospho-&alpha;-D-ribose 1-diphosphate				-0.83			-0.70		-0.99	-1.15
dUDP		-0.87		-0.88			-0.72	-0.79			-1.10
betanidin			1.68	0.70		-4.00	-4.00	-4.00	-4.00	-4.00	-4.00
1-<i>O</i>-sinapoyl-&beta;-D-glucose				-1.45						0.87
(-)-5'-demethylyatein							4.00			4.00	4.00
dopaxanthin			1.02
L-alanyl-&gamma;-D-glutamyl-<i>meso</i>-diaminopimelate						4.00	4.00	4.00	4.00	4.00	4.00
(9S,10S)-10-hydroxy-9-(phosphooxy) octadecanoate		-0.97		-0.86		-1.51	-1.60	-2.64	-2.21	-1.89	-2.03
phytosphingosine 1-phosphate		1.65
&delta;-tocotrienol		0.39	0.39	0.45
episterone		0.41	0.40	0.47
campest-4-en-3-one							1.12			0.91	1.19
benzyl 6-<i>O</i>-&beta;-<i>D</i>-apiofuranosyl-&beta;-<i>D</i>-glucopyranoside								0.72	0.93	0.76	0.65
<i>all-trans</i>-4,4'-diapo-&zeta;-carotene							1.27
<i>all-trans</i>-4,4'-diapophytofluene	-3.34
dADP	1.86	-4.00	-4.00	-4.00	-4.00	-4.00	-4.00	-4.00	-4.00	-4.00	-4.00
1-palmitoyl-<i>sn</i>-glycerol 3-phosphate							1.21				1.56
15-<i>cis</i>-4,4'-diapophytoene								0.52
squalene				0.40
4&alpha;-formyl-5&alpha;-cholesta-7,24-dien-3&beta;-ol						0.48
<i>N</i><sup>6</sup>-(&Delta;<sup>2</sup>-isopentenyl)-adenosine 5'-monophosphate						-0.63
sitosterol				0.90				1.34		1.03
guaiacol <i>O</i>-&beta;-<i>D</i>-xylopyranosyl-(1->6)-<i>O</i>-&beta;-<i>D</i>-glucopyranoside			1.44	1.30				1.42		1.12
4-(3-methylbutanoyl)sucrose								-1.51		-1.78
&beta;-D-glucopyranosyl abscisate								1.17		1.10
4&alpha;-formyl-ergosta-7,24(24<sup>1</sup>)-dien-3&beta;-ol	4.00	4.00	4.00
(3<i>S</i>)-2,3-epoxy-2,3-dihydrosqualene		0.52		0.66
4&alpha;-carboxy-5&alpha;-cholesta-8,24-dien-3&beta;-ol				0.48		0.58
3&beta;-hydroxy-4&beta;-methyl-5&alpha;-cholest-7-ene-4&alpha;-carbaldehyde						0.57
4&alpha;-carboxy-5&alpha;-cholesta-8-en-3&beta;-ol				0.32		0.46
furostanol-26-aldehyde						-1.90	-1.79				-2.83
26-amino-furostanol								-1.25	-1.45		-1.28
1-oleoyl-<i>sn</i>-glycerol 3-phosphate				0.96		1.02
6-deoxotyphasterol				0.34		0.49
GDP				0.15	-0.11	-4.00	-4.00	-4.00	-4.00	-4.00	-4.00
4&alpha;-carboxy-ergosta-7,24(24<sup>1</sup>)-dien-3&beta;-ol				0.36		0.44
4&alpha;-hydroxymethyl-stigmasta-7,24(24<sup>1</sup>)-dien-3&beta;-ol		0.41		0.55
dammarenediol II				0.38
methylsalicylate <i>O</i>-&beta;-<i>D</i>-xylopyranosyl-(1->6)-<i>O</i>-&beta;-<i>D</i>-glucopyranoside			2.97					3.09	4.19	3.86	3.59
geranylgeranyl diphosphate								1.12
16-feruloyloxypalmitate		-4.00	-4.00				-4.00	-1.82	-4.00	-4.00	-4.00
linalyl 6-<i>O</i>-&alpha;-<i>L</i>-arabinopyranosyl- &beta;-<i>D</i>-glucopyranoside				0.93				1.12	1.39	0.99	0.99
teasterone				0.41
1-(18-hydroxyoleoyl)-<i>sn</i>-glycrol 3-phosphate					-4.00			-3.26	-3.29	-3.43
tetrahydrogeranylgeranyl diphosphate								-2.01	-1.79		-3.76
phylloquinol				0.39
3'-<i>O</i>-demethyl-staurosporine							4.00				4.00
phytyl diphosphate						1.09	1.81	1.16	1.65	0.81	1.11
betulinate				0.31		0.51
ursolate				0.37		0.53
4&alpha;-hydroxymethyl,4&beta;,14&alpha;-dimethyl-9&beta;,19-cyclo-5&alpha;-ergost-24(24<sup>1</sup>)-en-3&beta;-ol				0.37		0.41
(R)-amygdalin								-0.94
(3&beta;,9&beta;)-4&alpha;-demethyl-4&alpha;-carboxy-9,19-cyclolanost-3-ol							0.63	-0.57		-0.68
(20<i>S</i>)-protopanaxadiol								-6.02		-5.95	-6.08
7-(methylsulfanyl)heptyl-glucosinolate				4.00				4.00		4.00
8-(methylsulfanyl)octyl-glucosinolate		-0.26				-4.00	-4.00	-4.00	-4.00	-4.00	-4.00
16-sinapoyloxypalmitate		-0.90				-1.03		-1.25		-1.23
(<i>22R,23R</i>)-28-homocastasterone		0.49		0.52
(<i>E</i>)-1-(glutathion-<i>S</i>-yl)-<i>N</i>-hydroxy-&omega;-(methylsulfanyl)heptan-1-imine						4.00	4.00	4.00	4.00	4.00	4.00
UTP		4.00	4.00
brassinolide		0.53	0.45	0.64						0.40
prochaetoglobosin I									1.25
kanamycin B				1.08		1.24	1.49			1.32
&beta;-D-glucosyl crocetin						4.00	4.00	4.00	4.00	4.00	4.00
D-<i>myo</i>-inositol (3,4,5,6)-tetrakisphosphate				0.40		0.60
8-(methylsulfinyl)octyl-glucosinolate						4.57	4.61	4.71		5.10	4.90
26-hydroxybrassinolide							0.66				0.52
raffinose				3.40	0.02			4.04		4.24	3.29
MoO<sub>2</sub>-molybdopterin cofactor						0.76
(+)-secoisolariciresinol monoglucoside		-1.07	-4.00			-0.82	-1.95	-1.39	-4.00	-4.00	-4.00
4-dodecanoylsucrose				0.42		0.82	0.51		0.35
dTDP-4-dehydro-2,6-dideoxy-&alpha;-D-threo-hexopyranose				0.58
C34-phenolphthiodiolenone A			0.62			-1.01	-1.17			-1.12	-1.61
thio-molybdenum cofactor				0.41
C34-phenolphthiodiolone A	-0.48
pyropheophorbide <i>a</i>							0.85
m<sup>7</sup>GTP		4.00	4.00
(lipoyl)adenylate				0.69
&gamma;-carotene			0.58
methanophenazine		2.37
7,9,9'-<i>cis</i>-neurosporene			0.52
dihydromethanophenazine				0.68		0.75
CMP-3-deoxy-&beta;-D-<i>manno</i>-octulosonate				0.50
15,9'-di-<i>cis</i>-phytofluene				0.61
<i>trans</i>-zeatin-<i>O</i>-glucoside-7-<i>N</i>-glucoside							1.34
dihydrozeatin-9-<i>N</i>-glucoside-<i>O</i>-glucoside						4.00	4.00	4.00	4.00	4.00	4.00
dTDP-&beta;-L-rhamnose						0.78
UDP-&beta;-L-rhamnose		0.43		0.55		0.87
C35-phenolphthiocerol A						-0.72
echinenone			0.81			-1.72	-1.94	-0.63		-1.58	-2.53
&alpha;-cryptoxanthin		0.76	1.33				-1.01				-1.24
ADP-D-ribose		0.35		0.52
protoporphyrin IX						-1.31
C36-phenolphthiodiolone A				0.41		0.38
dTDP-&alpha;-D-glucose		0.37		0.53		0.82
UDP-&alpha;-D-galactofuranose		0.38		0.47
3,4,3',4'-tetradehydroisozeaxanthin		-2.24
4'-hydroxyechinenone						-2.08	-2.04
D-<i>myo</i>-inositol 1,3,4,5,6-pentakisphosphate						4.00	4.00	4.00	4.00	4.00	4.00
1-(5-phospho-&beta;-D-ribosyl)-5-[(5-phosphoribosylamino)methylideneamino]imidazole-4-carboxamide						-0.81
pelargonidin 3-<i>O</i>-&beta;-D-p-coumaroylglucoside				0.59		0.46
C-13<sup>2</sup>-carboxypyropheophorbide <i>a</i>								-1.48	-0.65
pelargonidin-3-<i>O</i>-rutinoside						0.89
3-isobutanoyl-3',4-di(3-methylbutanoyl)sucrose								-2.59	-3.44
3-decanoyl-4-(3-methylbutanoyl)sucrose				2.08			2.72	2.09
(3E)-phytochromobilin				4.00			4.00				4.00
presqualene diphosphate					-3.82
antheraxanthin						-1.54	-1.49	-0.88		-1.41	-2.11
pheophorbide <i>a</i>		-1.84		-2.56		-1.82	-1.65	-1.52			-2.02
ubiquinone-<i>6</i>						1.93	3.00	4.63	5.06	5.05	5.18
pelargonidin-3,5-di-<i>O</i>-&beta;-<i>D</i>-glucoside				-2.34
3-(2-methylbutanoyl)-3',4-di(3-methylbutanoyl)sucrose		1.41	1.41	2.24		2.20	2.94	2.18	1.73	2.18	1.59
cyanidin 3,5-di-<i>O</i>-&beta;-D-glucoside				-1.69				-0.77
glutathione disulfide				-1.69				-0.77
3,5-di-<i>C</i>-glucosyl-2,4,4',6-tetrahydroxydibenzoylmethane		1.16
CMP-<i>N</i>-acetyl-&beta;-neuraminate	0.65	-0.94	-2.19	-4.00		0.41	-4.00	-4.00	-4.00	0.28	-4.00
<i>O</i>-methyl-4-<i>O</i>-[2-<i>O</i>-methyl-&alpha;-L-fucopyranosyl-(1&rarr;3)-&alpha;-L-rhamnopyranosyl-(1&rarr;3)-2-<i>O</i>-methyl-&alpha;-L-rhamnopyranosyl]-hydroxybenzoate		1.85	1.69	2.23		2.43	1.89	2.49	2.05	1.85	1.80
eugenol 2-<i>O</i>-&beta;-<i>D</i>-glucopyranosyl-(1 -> 2)-[<i>O</i>-&beta;-<i>D</i>-xylopyranosyl-(1 -> 6)]-<i>O</i>-&beta;-<i>D</i>-glucopyranoside					4.00
red chlorophyll catabolite						0.61			-1.92	-0.85	-0.88
2-acetyl-3-(2-methylbutanoyl)-3',4-di(3-methylbutanoyl)sucrose		0.63	0.61	1.15		1.30	1.18	0.82	0.73	1.12
demethylmenaquinol-7				0.43		0.58
steviolbioside		-4.00	-4.00		1.13			-4.00	-4.00	-0.33	-4.00
phytate		-0.05		-0.35		-4.00	-4.00	-4.00	-4.00	-4.00	-4.00
1-[18-hydroxyoeoyl]-2-[18-hydroxy-linoleoyl]-<i>sn</i>-glycerol				0.53		0.62
bis(&beta;-D-glucosyl) crocetin		-1.71	-1.59						-1.62	-1.17
3-(<i>all-trans</i>-octaprenyl)benzene-1,2-diol								2.85
coproporphyrinogen III			-2.34	-2.06				-3.50	-4.55	-3.30	-3.53
3-decanoyl-3',4-di(3-methylbutanoyl)sucrose			0.95	1.33		1.83	2.33	1.66	1.38	1.78	1.16
stachyose								1.47	1.31
3-dodecanoyl-3'-isobutanoyl-4-(3-methylbutanoyl)sucrose				1.51		1.99	2.49	1.74	1.43	2.01	1.19
(<i>R</i>)-NADHX				0.80
3-octaprenyl-4-hydroxybenzoate	-1.25
selenodiglutathione			5.04
2-methoxy-6-<i>all trans</i>-octaprenyl-1,4-benzoquinol		0.43		0.34		0.39
3-dodecanoyl-3',4-di(3-methylbutanoyl)sucrose			0.84	1.14		1.21	1.25	1.12	0.83	1.22	0.55
6-methoxy-3-methyl-2-<i>all-trans</i>-octaprenyl-1,4-benzoquinol		0.78	0.67
demethylmenaquinol-8				0.50
2-acetyl-3-decanoyl-3',4-di(3-methylbutanoyl)sucrose						1.56	1.78	1.56	0.98	1.77
&beta;-chaconine				4.00		4.00	4.00	4.00	4.00	4.00	4.00
lipid X			0.79	1.29		1.72	1.74	1.38	1.01	1.30	0.76
&beta;-solanine								1.63	1.51
cyanidin 3-<i>O</i>-&beta;-<i>D</i>-(p-coumaroyl)-sambubioside						1.86	1.89		1.01	0.95
1D-<i>myo</i>-inositol 3-diphosphate 1,2,4,5,6-pentakisphosphate						1.58
1-[18-hydroxyoeoyl]-2-[18-hydroxy-lioleoyl]-<i>sn</i>-glycerol 3-phosphate			-3.30							-3.07
ubiquinol-<i>8</i>						3.58
2-acetyl-3-dodecanoyl-3',4-di(3-methylbutanoyl)sucrose			0.90	1.37		2.09	2.19	1.81	1.44	2.07	1.09
&gamma;-tomatine							0.65			0.67
1-&alpha;-linolenoyl-2-(3E)-hexadecenoyl-phosphatidylglycerol						-5.22
1-18:3-2-16:3-monogalactosyldiacylglycerol		1.19
1-18:2-2-16:3-monogalactosyldiacylglycerol		0.61	0.53
3-nonaprenyl-4-hydroxybenzoate			1.64						1.14	1.41
1-18:2-2-16:2-monogalactosyldiacylglycerol							-0.77			-0.70
plastoquinol-9										-3.09
1-18:1-2-16:1-monogalactosyldiacylglycerol							-0.44			-0.50
1-palmitoyl-2-&alpha;-linolenoyl-phosphatidylcholine			0.99						1.13	1.08
1-18:1-2-16:0-monogalactosyldiacylglycerol						-2.70	-2.47	-2.39	-2.53	-2.24	-2.30
1-palmitoyl-2-linoleoyl-phosphatidylcholine			1.02				0.76		0.87	0.97	0.70
(<i>R</i>)-NADPHX				0.43		0.70
1-palmitoyl-2-oleoyl-phosphatidylcholine			0.95
a coenzyme-A group				1.02
demethylmenaquinol-9	-4.34								-4.19
1-palmitoyl-2-vernoloyl-phosphatidylcholine						4.00	4.00		4.00
1-18:3-2-18:2-monogalactosyldiacylglycerol			0.57
1-&alpha;-linolenoyl-2-&alpha;-linolenoyl-phosphatidylcholine			0.93						1.04	0.99	0.83
1-oleoyl-2-&alpha;-linolenoyl-phosphatidylcholine			0.99
1-linoleoyl-2-oleoyl-phosphatidylcholine			1.10			-0.98	-1.02				-0.98
1-oleoyl-2-oleoyl-phosphatidylcholine			1.60
menaquinol-<i>9</i>				0.36
formyl-CoA				0.51		0.52
stevioside								4.00	4.00		4.00
&beta;-D-gentiobiosyl &beta;-D-glucosyl crocetin						4.00	4.00			4.00
3-hydroxypropanoyl-CoA		0.60		0.58		0.49
&alpha;-chaconine							4.00		4.00	4.00
(2S,3S)-3-hydroxy-2-methylbutanoyl-CoA				0.64		0.50
UDP-<i>N</i>-acetyl-&alpha;-D-muramoyl-L-alanyl-D-glutamate						0.83
pheophytin b		3.43
chlorophyll <i>a</i>		4.00								4.00	4.00
cyanidin 3-<i>O</i>-glucoside-7-<i>O</i>-(6-<i>O</i>-(4-<i>O</i>-(glucosyl)-oxybenzoyl)-glucoside)				-0.03
&beta;1-tomatine		-0.58				-0.54		-0.83	-0.77		-0.95
chlorophyll <i>b</i>							3.56
7<sup>1</sup>-hydroxychlorophyll <i>a</i>		1.52	1.40	1.19		1.48		1.28	1.20	1.43	1.29
1-16:0-2-18:3-digalactosyldiacylglycerol		0.94	0.65	0.53					0.58	0.66	0.79
1-16:0-2-18:2-digalactosyldiacylglycerol		0.69	0.48					0.47	0.59	0.53	0.70
indole-3-acetyl-CoA										4.00
1-18:2-2-18:3-digalactosyldiacylglycerol			0.39
1-18:2-2-18:2-digalactosyldiacylglycerol			0.38
soyasaponin I			1.37
CDP-1,2-dipalmitoylglycerol	4.00	4.00			4.00
palmitoleoyl-CoA										-1.01	-0.94
delphinidin 3-<i>O</i>-rutinoside-7-<i>O</i>-(6-<i>O</i>-(4-<i>O</i>-(glucosyl)-oxybenzoyl)-glucoside)									-1.44
