# Supplementary material for: Integrated Metabolomics and Morpho-Biochemical Analyses Reveal a Better Performance of Azospirillum brasilense over Plant-Derived Biostimulants in Counteracting Salt Stress in Tomato
Source: Int J Mol Sci. 2022 Nov 17;23(22):14216. doi: 10.3390/ijms232214216 (PMC9698407; doi:10.3390/ijms232214216)
Supplement: Supplementary file 1 [file ijms-23-14216-s001.zip › Supplementary Table S5.xlsx]

## Sheet: Root exudates Low Salt
Class	Compound	Log FC Ab	Log FC C	Log FC D	Log FC H	Log FC P
acids, carbocyclic	Homoveratric acid
acids, carbocyclic	Vanillic acid		0.970967		2.11623
acids, carbocyclic	Methoxyphenylacetic acid					0.930713
acids, carbocyclic	Homovanillic acid	1.66907
acids, carbocyclic	Media Sum	1.66907	0.970967	0	2.11623	0.930713
amino acids	L-threonine	3.09056
amino acids	L-valine
amino acids	L-ornithine
amino acids	L-citrulline	4		4	4	4
amino acids	L-lysine
amino acids	L-arginine
amino acids	Media Sum	7.09056	0	4	4	4
amino acids, aromatic	L-tryptophan
amino acids, aromatic	L-phenylalanine
amino acids, sulfur	L-homocysteine
anisoles	Anethole
anthocyanins	Methylgalangin		-2.31695	-3.05194	-4
anthocyanins	Peonidin	4				4
anthocyanins	Quercetin 3-O-acetyl-rhamnoside		-2.55888
anthocyanins	Cyanidin 3,5-O-diglucoside
caffeic acids	Eugenol
caffeic acids	Caffeic acid ethyl ester		-0.768221
caffeic acids	Caffeoyl tartaric acid	-2.0555	-0.408497			-0.0656929
caffeic acids	4-Ethylguaiacol	-0.435044
caffeic acids	Caffeic acid	4				4
caffeic acids	Hydroxycaffeic acid			2.47401	1.90895
caffeic acids	Media Sum	1.50945	-1.17672	2.47401	1.90895	3.93431
carotenoids	Neurosporene	0.56559	0.577874			-0.326877
catechols	Acetyl eugenol
catechols	4-Ethylcatechol
catechols	3,4-Dihydroxyphenylglycol
coumaric acids	24-Methyllathosterol ferulate	-2.59226
coumaric acids	Sitostanyl ferulate	-1.54914
coumarins	scopoletin
coumarins	Esculin	4			4
coumarins	Coumarin		4			4
coumarins	4-Hydroxycoumarin
deoxy sugars	deoxyribose	4		4	4
flavonoids	(-)-Epicatechin
flavonoids	Formononetin		-4	-4
flavonoids	isosakuranetin		-2.4044			-1.65864
flavonoids	Cirsimaritin	4		4	4
flavonoids	Tetramethylscutellarein			3.36183	4.16351	3.11969
flavonoids	Pelargonidin 3-O-arabinoside
flavonoids	6-Prenylnaringenin
flavonoids	6''-O-Acetylglycitin	-1.6338	-4	-4	-4.68012
flavonoids	Petunidin 3-O-rutinoside
flavonoids	Hesperidin
furans	tetronic acid
gluconates	gluconic acid	2.15044
glutamates	L-glutamate	4	4			4
glycosides	Phlorin
hydroxybenzoates	protocatechuic acid	-1.49722	-4	-4	-4
indoles	Indol
lignans	Episesamin
lignans	Secoisolariciresinol
lignans	Arctigenin
lignans	1-Acetoxypinoresinol	4
lignans	Dimethylmatairesinol
lignans	Syringaresinol
lignans	Secoisolariciresinol-sesquilignan
lignans	Media Sum	4	0	0	0	0
malates	citramalic acid	4
malonates	malonic acid		4	4	4
naphthoquinones	1,4-Naphtoquinone			1.11562
ortho-aminobenzoates	Avenanthramide 2c
ortho-aminobenzoates	Avenanthramide K	-4			-4
ortho-aminobenzoates	Avenanthramide 2f			1.15711
ortho-aminobenzoates	Media Sum	-4	0	1.15711	-4	0
Others	Benzoic acid			4	4
Others	3-hydroxymugineic acid
Others	brachialactone
Others	epsilon-carotene
Others	deoxymugineic acid
Others	Feruloyl tartaric acid
Others	Cinnamoyl glucose
Others	p-Coumaroyl glucose
Others	Anhydro-secoisolariciresinol			1.24082
Others	Naringenin 7-O-glucoside
Others	3-Methoxysinensetin	-0.937262
Others	Strigyl acetate	-2.3583
Others	Malvidin 3-O-(6''-acetyl-galactoside)	-0.873659
Others	Kaempferol 3,7-O-diglucoside
Others	Peonidin 3-O-rutinoside	-0.802809
Others	Delphinidin 3-O-feruloyl-glucoside
Others	24-Methylcholestanol ferulate
Others	aminocyclopropane-1-carboxilic
Others	ribose/xylose
Others	avenacin A2				4
Others	glucose/fructose				1.54697
phenols	p-Coumaric acid ethyl ester	0.130989				0.993281
phenols	p-Coumaroyl malic acid			4	4
pyrrolidinones	pyroglutamate		-4	-4	-4	-4
saponins	avenacin A1
Saturated FA	Lauric acid
Saturated FA	Palmitic acid
Saturated FA	Behenic acid
Saturated FA	Caprylic acid			1.03066
stilbenes	4-Vinylsyringol	1.80107
stilbenes	Piceatannol	-1.8585			-1.71002
stilbenes	Resveratrol 3-O-glucoside	-4	-4	-4	-4
terpenes	Carnosol
terpenes	Epirosmanol
terpenes	avenacin B2
UnSaturated FA	5-Nonadecylresorcinol
UnSaturated FA	5-Tricosenylresorcinol
UnSaturated FA	5-Pentacosenylresorcinol
xanthophylls	Cryptoxanthin	-0.763338
xanthophylls	Lutein			1.5389
xanthophylls	Capsanthin
xanthophylls	Violaxanthin

## Sheet: Root exudates High salt
Class	Compound	Log FC NaCl	Log FC NaCl+Ab	Log FC NaCl+C	Log FC NaCl+D	Log FC NaCl+H	Log FC NaCl+P
acids, carbocyclic	Homoveratric acid			4			4
acids, carbocyclic	Vanillic acid
acids, carbocyclic	Methoxyphenylacetic acid
acids, carbocyclic	Homovanillic acid						1.44995
amino acids	L-threonine		2.47332		1.57445	2.0175
amino acids	L-valine					2.87396
amino acids	L-ornithine				4	4
amino acids	L-citrulline			4	4	4
amino acids	L-lysine			1.87924
amino acids	L-arginine	2.27592		1.87214	1.68284		1.84461
amino acids, aromatic	L-tryptophan				4	4
amino acids, aromatic	L-phenylalanine				3.29673
amino acids, sulfur	L-homocysteine	4	4		4
anthocyanins	Methylgalangin	-1.66537	0.22967	-4	-3.34532	-4	-4
anthocyanins	Peonidin			4
anthocyanins	Quercetin 3-O-acetyl-rhamnoside
anthocyanins	Cyanidin 3,5-O-diglucoside				-0.883961
anthocyanins	Cyanidin 3-O-glucosyl-rutinoside				-0.884215
caffeic acids	Eugenol					2.63802
caffeic acids	Caffeic acid ethyl ester	-4	-2.43955	-4	-4	-4	-4
caffeic acids	Caffeoyl tartaric acid
caffeic acids	4-Ethylguaiacol						-0.277585
caffeic acids	Caffeic acid
caffeic acids	Hydroxycaffeic acid				1.89431	2.9081
catechols	Acetyl eugenol	4	4
catechols	4-Ethylcatechol	4					4
catechols	3,4-Dihydroxyphenylglycol	4		4	4		4
coumaric acids	24-Methyllathosterol ferulate
coumaric acids	Sitostanyl ferulate	3.33433	3.71768				2.85819
coumarins	scopoletin	4		4	4		4
coumarins	Esculin
coumarins	Coumarin
coumarins	4-Hydroxycoumarin				4		4
flavonoids	(-)-Epicatechin	0.545428		0.748319	-0.0204792	0.0897464
flavonoids	Formononetin	-4				2.1642
flavonoids	isosakuranetin	-4	-4	-2.65944	-1.15723	-0.976246	-4
flavonoids	Cirsimaritin			4
flavonoids	Tetramethylscutellarein			3.85709	2.56716	4.00778
flavonoids	Pelargonidin 3-O-arabinoside				4	4	4
flavonoids	6-Prenylnaringenin	4	4				4
flavonoids	6''-O-Acetylglycitin	-1.75587					-2.11262
flavonoids	Petunidin 3-O-rutinoside			-0.77546
flavonoids	Hesperidin	4		4			4
lignans	Episesamin				-2.45917
lignans	Secoisolariciresinol	4					4
lignans	Arctigenin	4	4		4		4
lignans	1-Acetoxypinoresinol					4
lignans	Dimethylmatairesinol				-0.839574
lignans	Syringaresinol	1.5888			2.20094		1.77067
lignans	Secoisolariciresinol-sesquilignan	4			4		4
ortho-aminobenzoates	Avenanthramide 2c	0.75885			1.09422
ortho-aminobenzoates	Avenanthramide K	0.115924	1.50253	-4		-4	0.418121
ortho-aminobenzoates	Avenanthramide 2f
Others	3-hydroxymugineic acid	4	4		4	4	4
Others	brachialactone				1.86421
Others	epsilon-carotene	-2.24192	-3.59301		-2.05559		-3.37997
Others	Anethole				-1.26667
Others	Benzoic acid
Others	Neurosporene
Others	deoxyribose			4		4
Others	tetronic acid		-0.122297
Others	gluconic acid					2.60356
Others	L-glutamate
Others	Phlorin		1.68504
Others	protocatechuic acid	-4	-1.4114	-4	-4	0.47127	-0.50782
Others	Indol	0.764625		0.903308
Others	citramalic acid
Others	malonic acid
Others	1,4-Naphtoquinone				-1.87431
Others	pyroglutamate		-4			-4	-0.997326
Others	deoxymugineic acid				-1.69546		-1.38567
Others	Feruloyl tartaric acid	1.41266		1.01785	0.960318		0.92498
Others	Cinnamoyl glucose			-3.12643	-1.49163
Others	p-Coumaroyl glucose				4		4
Others	Anhydro-secoisolariciresinol
Others	Naringenin 7-O-glucoside				-0.875729
Others	3-Methoxysinensetin	-1.3272		-1.4057	-1.67953	-1.14721	-1.11509
Others	Strigyl acetate	-1.97962		-2.07366	-1.83586	-1.51396	-1.34571
Others	Malvidin 3-O-(6''-acetyl-galactoside)				-1.17115
Others	Kaempferol 3,7-O-diglucoside			-1.65409
Others	Peonidin 3-O-rutinoside				-1.00393
Others	Delphinidin 3-O-feruloyl-glucoside			-0.77546
Others	24-Methylcholestanol ferulate		-3.54117		-2.04109
Others	aminocyclopropane-1-carboxilic	-1.96837
Others	ribose/xylose			4	4
Others	avenacin A2	4	4	4	4	4	4
Others	glucose/fructose			1.98217	2.05318	2.86795
phenols	p-Coumaric acid ethyl ester
phenols	p-Coumaroyl malic acid
saponins	avenacin A1	4	4	4	4	4	4
Saturated FA	Lauric acid		-4.49327	-4.11192	-2.77974	-4.48895	-4.40914
Saturated FA	Palmitic acid			2.6428	2.87729	2.21439
Saturated FA	Behenic acid	1.51387	2.09112
Saturated FA	Caprylic acid				-1.05735
stilbenes	4-Vinylsyringol					3.0457
stilbenes	Piceatannol
stilbenes	Resveratrol 3-O-glucoside
terpenes	Carnosol	4	4		4	4	4
terpenes	Epirosmanol	4		4	4		4
terpenes	avenacin B2	4	4	4	4	4	4
UnSaturated FA	5-Nonadecylresorcinol	4		4	4
UnSaturated FA	5-Tricosenylresorcinol	-2.08833			-2.60793
UnSaturated FA	5-Pentacosenylresorcinol			-1.68913	-2.75893
xanthophylls	Cryptoxanthin			-0.917535	-1.28852	-0.795637	-1.27078
xanthophylls	Lutein	-4	-4	-1.56409		-4	-2.65937
xanthophylls	Capsanthin				-3.01536
xanthophylls	Violaxanthin		-3.02159		-2.021
