# Supplementary figures and images for: Integrated Metabolomics and Morpho-Biochemical Analyses Reveal a Better Performance of Azospirillum brasilense over Plant-Derived Biostimulants in Counteracting Salt Stress in Tomato
Source: MDPI journal article supplement (doi:10.3390/ijms232214216), 2022-11-17

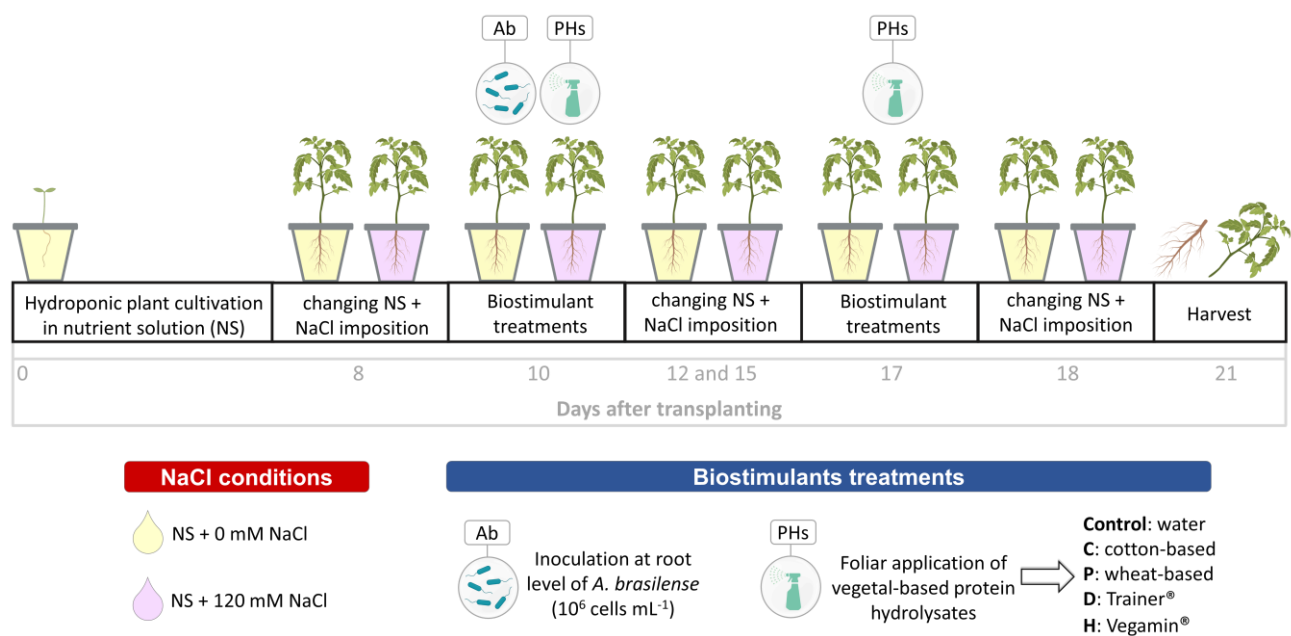

**Supplementary Figure S3.** Schematic representation of the experimental setup

Supplement: s1 [file s1]
